# Supplementary material for: Decoding the spatial chromatin organization and dynamic epigenetic landscapes of macrophage cells during differentiation and immune activation
Source: Nat Commun. 2022 Oct 4;13:5857. doi: 10.1038/s41467-022-33558-5 (PMC9532393; doi:10.1038/s41467-022-33558-5)
Supplement: Supplementary file 4 — Supplementary Dataset 1 [file 41467_2022_33558_MOESM4_ESM.xlsx]

## Sheet: All gene
genename	id	baseMean	baseMeanTHP	baseMeanTHPP	foldChange	log2FoldChange	pval	padj
FGR	ENSG00000000938	586.886	96.226	1077.55	11.1981	3.48518	9.79495e-82	1.50355e-79
LAP3	ENSG00000002549	1562.48	608.655	2516.31	4.13421	2.04761	2.35427e-47	1.4534e-45
CD99	ENSG00000002586	6310.31	2900.32	9720.3	3.35146	1.74479	3.13539e-41	1.63075e-39
HS3ST1	ENSG00000002587	68.985	15.941	122.029	7.65503	2.93641	7.28611e-16	1.2457e-14
LASP1	ENSG00000002834	4992.51	2715.31	7269.71	2.6773	1.42078	9.5394e-28	3.05067e-26
SNX11	ENSG00000002919	1093.44	442.309	1744.57	3.94424	1.97975	1.73661e-40	8.80649e-39
M6PR	ENSG00000003056	2385.01	1221.1	3548.92	2.90632	1.53919	2.12639e-31	7.81179e-30
KLHL13	ENSG00000003096	458.573	672.669	244.477	0.363444	-1.4602	1.19496e-17	2.30063e-16
CYP26B1	ENSG00000003137	312.67	567.109	58.2312	0.102681	-3.28376	1.70067e-52	1.24473e-50
ALS2	ENSG00000003393	1276.21	299	2253.42	7.53651	2.9139	3.45135e-82	5.35581e-80
TFPI	ENSG00000003436	26.8528	12.1414	41.5643	3.42336	1.77541	0.000387401	0.00192756
SLC7A2	ENSG00000003989	86.6522	136.533	36.7714	0.269322	-1.89259	5.92033e-10	6.40966e-09
FKBP4	ENSG00000004478	600.67	814.079	387.261	0.475704	-1.07186	2.33795e-06	1.67702e-05
HSPB6	ENSG00000004776	10.8191	18.0886	3.54955	0.196231	-2.34937	0.00566949	0.0221217
ARHGAP33	ENSG00000004777	403.469	600.392	206.545	0.344018	-1.53945	1.75502e-17	3.33595e-16
SKAP2	ENSG00000005020	1439.4	777.65	2101.14	2.70191	1.43398	5.0298e-24	1.37343e-22
CCDC109B	ENSG00000005059	120.42	48.8978	191.943	3.92539	1.97283	3.26927e-13	4.58926e-12
LIG3	ENSG00000005156	349.23	468.986	229.473	0.489296	-1.03122	1.32994e-08	1.25515e-07
ACSM3	ENSG00000005187	45.5407	79.7062	11.3752	0.142714	-2.80881	2.28925e-10	2.5849e-09
AC004381.6	ENSG00000005189	655.174	1039.15	271.196	0.260979	-1.938	2.93196e-33	1.15802e-31
FAM214B	ENSG00000005238	979.076	348.147	1610	4.6245	2.2093	8.31213e-48	5.2223e-46
MSL3	ENSG00000005302	757.69	300.899	1214.48	4.03617	2.01299	2.13181e-37	9.84378e-36
BZRAP1	ENSG00000005379	390.907	524.812	257.002	0.489702	-1.03002	0.0129188	0.0460949
MPO	ENSG00000005381	110.052	191.625	28.4794	0.14862	-2.7503	4.69624e-19	9.82061e-18
ABCB4	ENSG00000005471	231.36	66.4901	396.229	5.95922	2.57512	8.03092e-32	2.99294e-30
RHBDD2	ENSG00000005486	1642.6	968.534	2316.67	2.39194	1.25818	7.17014e-16	1.22809e-14
ITGAL	ENSG00000005844	2202.01	888.747	3515.27	3.95531	1.98379	5.97652e-47	3.62652e-45
ITGA3	ENSG00000005884	349.343	125.714	572.972	4.55773	2.18832	2.7514e-30	9.79126e-29
ITGA2B	ENSG00000005961	16.2604	25.3567	7.16413	0.282534	-1.82351	0.01195	0.0430435
C19orf60	ENSG00000006015	1125.71	734.697	1516.72	2.06441	1.04573	1.23693e-13	1.79216e-12
YBX2	ENSG00000006047	32.3905	46.419	18.3621	0.395574	-1.33798	0.00814229	0.0305893
MAP3K14	ENSG00000006062	146.856	61.3689	232.343	3.78601	1.92068	1.5129e-14	2.349e-13
CCL3	ENSG00000006075	29.9798	10.49	49.4695	4.71585	2.23752	2.09984e-05	0.000131202
TMEM132A	ENSG00000006118	16.7224	4.04724	29.3976	7.26361	2.86069	8.81569e-05	0.000492229
TNFRSF12A	ENSG00000006327	660.194	100.685	1219.7	12.114	3.59861	4.53214e-70	5.31834e-68
DLX6	ENSG00000006377	32.6898	55.5045	9.87505	0.177914	-2.49075	2.709e-06	1.92614e-05
RALA	ENSG00000006451	1028	622.116	1433.88	2.30484	1.20466	4.96436e-17	9.18424e-16
TBXA2R	ENSG00000006638	433.942	151.071	716.812	4.74486	2.24636	7.21499e-35	3.01754e-33
CEACAM21	ENSG00000007129	108.402	69.2161	147.588	2.13227	1.09239	4.47431e-05	0.000264601
NOS2	ENSG00000007171	20.571	5.45134	35.6906	6.54712	2.71086	2.01219e-05	0.000126002
GAS7	ENSG00000007237	4922.54	1690.85	8154.23	4.82257	2.2698	6.12319e-66	6.41647e-64
SCN4A	ENSG00000007314	84.5103	163.212	5.80866	0.0355897	-4.8124	4.26654e-31	1.54938e-29
TKTL1	ENSG00000007350	1002.84	1706.37	299.307	0.175406	-2.51123	4.68642e-58	3.94911e-56
RHBDF1	ENSG00000007384	1359.65	349.47	2369.83	6.78122	2.76154	9.59292e-76	1.29109e-73
E2F2	ENSG00000007968	347.579	528.788	166.369	0.314623	-1.6683	6.42505e-10	6.92875e-09
ADAM22	ENSG00000008277	61.3643	88.2959	34.4327	0.389969	-1.35857	0.000172856	0.000916327
CELSR3	ENSG00000008300	293.621	392.006	195.235	0.498042	-1.00566	1.95124e-07	1.60612e-06
ST3GAL1	ENSG00000008513	3127.05	1284.3	4969.81	3.86966	1.95221	2.15937e-48	1.37185e-46
RHOBTB2	ENSG00000008853	1302.79	647.15	1958.43	3.02624	1.59752	4.2056e-29	1.43719e-27
MASP2	ENSG00000009724	43.966	61.5347	26.3974	0.428984	-1.221	0.00392245	0.0158661
FAM76A	ENSG00000009780	100.548	66.8217	134.275	2.00946	1.00681	0.000478509	0.00233767
TRAF3IP3	ENSG00000009790	1023.82	636.737	1410.9	2.21583	1.14785	1.10454e-15	1.86588e-14
MLXIPL	ENSG00000009950	383.329	549.353	217.306	0.395568	-1.338	5.24303e-14	7.76285e-13
CD9	ENSG00000010278	1832.76	110.184	3555.33	32.2671	5.01199	1.8197e-197	1.98754e-194
NCAPD2	ENSG00000010292	2534.94	3684.9	1384.98	0.375853	-1.41176	6.10443e-20	1.35327e-18
GIPR	ENSG00000010310	233.951	366.975	100.927	0.275024	-1.86237	6.62496e-12	8.46695e-11
PHF7	ENSG00000010318	339.504	535.971	143.037	0.266875	-1.90577	1.25029e-23	3.33701e-22
SEMA3G	ENSG00000010319	109.518	158.835	60.2011	0.379016	-1.39967	0.000174689	0.000925525
STAB1	ENSG00000010327	9.85621	1.89965	17.8128	9.3769	3.22911	0.00101091	0.00462953
SLC6A13	ENSG00000010379	5.64273	0.991088	10.2944	10.3869	3.3767	0.00908297	0.0337351
IDS	ENSG00000010404	1312.31	478.07	2146.56	4.49004	2.16673	4.52472e-50	3.07399e-48
SCMH1	ENSG00000010803	4667.56	6844.74	2490.38	0.363838	-1.45863	9.10089e-18	1.76294e-16
HIVEP2	ENSG00000010818	221.415	391.424	51.4068	0.131333	-2.9287	4.14309e-35	1.75083e-33
LYPLA2	ENSG00000011009	1487.61	930.952	2044.26	2.19588	1.1348	4.32883e-16	7.53249e-15
MRC2	ENSG00000011028	13446.1	7923.2	18969	2.39411	1.25949	4.17338e-24	1.14287e-22
TSPAN9	ENSG00000011105	33.0121	13.8763	52.1479	3.75805	1.90998	8.77002e-05	0.000490258
MKS1	ENSG00000011143	289.219	393.822	184.616	0.46878	-1.09302	6.68672e-09	6.54565e-08
DPF1	ENSG00000011332	32.6325	55.4224	9.84254	0.177592	-2.49337	1.39567e-06	1.02732e-05
PLAUR	ENSG00000011422	8272.5	573.97	15971	27.8255	4.79834	3.74008e-233	5.59004e-230
MAP4K3	ENSG00000011566	183.565	108.034	259.095	2.39826	1.26199	5.10196e-06	3.49459e-05
TYROBP	ENSG00000011600	7706.25	2107.05	13305.5	6.31473	2.65872	7.05431e-90	1.2679e-87
BRCA1	ENSG00000012048	710.587	1040.71	380.469	0.365587	-1.45171	0.000186305	0.000980847
CD22	ENSG00000012124	384.989	0	769.979	Inf	Inf	4.4119e-152	2.19806e-149
SEMA3B	ENSG00000012171	54.6047	82.8445	26.3649	0.318245	-1.65179	1.47927e-05	9.46559e-05
ALOX5	ENSG00000012779	158.678	214.174	103.183	0.48177	-1.05358	3.55175e-06	2.48921e-05
MAN2B2	ENSG00000013288	3866.62	1845.8	5887.44	3.18964	1.67339	2.38748e-37	1.09886e-35
MVP	ENSG00000013364	2068.46	741.888	3395.04	4.57622	2.19416	5.65288e-56	4.58659e-54
CLK1	ENSG00000013441	789.372	434.042	1144.7	2.6373	1.39906	1.61932e-20	3.69065e-19
DNASE1L1	ENSG00000013563	314.486	199.554	429.418	2.15189	1.10561	2.75832e-09	2.78164e-08
DDX11	ENSG00000013573	1026.57	1436.93	616.199	0.428829	-1.22152	1.21932e-16	2.19015e-15
MAMLD1	ENSG00000013619	70.302	21.6403	118.964	5.49732	2.45873	1.44204e-12	1.93074e-11
CD6	ENSG00000013725	71.2675	35.9296	106.605	2.96706	1.56903	1.02563e-06	7.71135e-06
ACPP	ENSG00000014257	331.785	193.029	470.542	2.43768	1.28551	2.48757e-09	2.52293e-08
MTMR11	ENSG00000014914	316.241	190.965	441.517	2.31202	1.20916	3.21779e-10	3.58348e-09
BID	ENSG00000015475	1756.43	1071.78	2441.09	2.27761	1.18752	2.34213e-18	4.68393e-17
ISL1	ENSG00000016082	15.3378	25.1091	5.56649	0.221692	-2.17337	0.00247995	0.0104831
SRCIN1	ENSG00000017373	58.4187	88.2133	28.624	0.324486	-1.62377	1.35243e-05	8.70101e-05
SLC38A5	ENSG00000017483	456.204	714.965	197.444	0.276159	-1.85643	2.98279e-07	2.39755e-06
MAGIX	ENSG00000017621	68.5409	40.8033	96.2785	2.35958	1.23853	0.000159137	0.000848991
RUFY3	ENSG00000018189	120.505	169.323	71.6884	0.423383	-1.23996	3.54941e-06	2.48818e-05
SLC11A1	ENSG00000018280	405.171	259.766	550.576	2.11951	1.08373	4.23594e-10	4.67336e-09
WWTR1	ENSG00000018408	59.0661	39.2327	78.8996	2.01107	1.00796	0.00396949	0.0160418
ATP1A2	ENSG00000018625	8.07263	15.6934	0.451822	0.0287905	-5.11826	0.000328981	0.00165881
VSIG2	ENSG00000019102	109.496	39.8122	179.179	4.50062	2.17012	3.30669e-14	4.96843e-13
PHLDB1	ENSG00000019144	991.329	466.511	1516.15	3.24998	1.70043	3.83179e-30	1.35174e-28
MARCO	ENSG00000019169	44.3015	19.6581	68.9449	3.50719	1.81032	1.27565e-05	8.22941e-05
SAMD4A	ENSG00000020577	57.9005	24.9444	90.8566	3.64236	1.86487	3.4881e-07	2.77854e-06
CPS1	ENSG00000021826	118.955	188.65	49.2598	0.261118	-1.93723	1.07559e-12	1.4552e-11
ALAS1	ENSG00000023330	4767.73	1996.29	7539.17	3.7766	1.91709	2.7128e-48	1.7196e-46
BIRC3	ENSG00000023445	29.0476	10.8198	47.2754	4.36934	2.12742	2.60562e-05	0.000160496
PLEKHO1	ENSG00000023902	872.795	227.472	1518.12	6.67387	2.73852	1.491e-66	1.58582e-64
TYMP	ENSG00000025708	853.839	349.137	1358.54	3.89114	1.96019	1.60022e-37	7.4497e-36
VIM	ENSG00000026025	4267.87	427.276	8108.46	18.9771	4.24619	5.09131e-67	5.47663e-65
CD44	ENSG00000026508	13128	4595.55	21660.5	4.71337	2.23676	1.00675e-59	8.87874e-58
KCNG1	ENSG00000026559	525.492	800.535	250.448	0.312852	-1.67645	2.55529e-08	2.3446e-07
AGPAT4	ENSG00000026652	334.254	160.153	508.354	3.17417	1.66638	8.1819e-20	1.79837e-18
SLAMF7	ENSG00000026751	193.268	3.71676	382.819	102.998	6.68647	8.92756e-81	1.35575e-78
PRKCH	ENSG00000027075	295.614	121.087	470.141	3.88267	1.95705	5.16013e-23	1.33702e-21
IFNGR1	ENSG00000027697	1513	488.062	2537.95	5.20006	2.37853	4.34017e-46	2.5571e-44
TNFRSF1B	ENSG00000028137	3752.17	1167.76	6336.58	5.42628	2.43996	5.64355e-73	7.02919e-71
POU2F2	ENSG00000028277	1626.48	692.818	2560.14	3.69526	1.88568	4.13179e-42	2.19727e-40
ARNTL2	ENSG00000029153	157.413	88.7914	226.036	2.54569	1.34806	1.16358e-08	1.1055e-07
BAK1	ENSG00000030110	1938.37	1130.26	2746.49	2.42997	1.28094	4.26024e-21	1.00735e-19
GRN	ENSG00000030582	9609.88	4104.93	15114.8	3.68212	1.88054	1.94828e-48	1.24331e-46
ARHGAP31	ENSG00000031081	324.259	54.9272	593.59	10.8069	3.43387	1.04075e-58	8.95613e-57
CHPF2	ENSG00000033100	2848.23	1147.27	4549.18	3.96521	1.9874	3.06544e-49	2.0151e-47
FUT8	ENSG00000033170	1512.95	367.886	2658.02	7.22511	2.85302	1.49571e-82	2.35974e-80
GAB2	ENSG00000033327	3666.47	5111.44	2221.51	0.434615	-1.20219	3.90223e-15	6.33956e-14
ATP6V0A1	ENSG00000033627	2177.62	751.471	3603.76	4.79561	2.26171	2.10287e-47	1.30672e-45
APBA2	ENSG00000034053	758.436	1065.92	450.954	0.423067	-1.24104	2.1582e-09	2.20621e-08
MAP2K3	ENSG00000034152	1328.54	855.705	1801.38	2.10514	1.07392	2.4928e-14	3.78762e-13
TMSB10	ENSG00000034510	15450.7	4628.06	26273.4	5.67697	2.50512	4.67439e-84	7.71764e-82
VCL	ENSG00000035403	2563.77	1510.54	3617.01	2.39452	1.25974	3.36908e-21	8.01298e-20
DAPK2	ENSG00000035664	249.391	110.184	388.598	3.52681	1.81836	4.39986e-19	9.2144e-18
STAP1	ENSG00000035720	40.2833	7.1034	73.4631	10.342	3.37044	3.46131e-12	4.50478e-11
TIMP2	ENSG00000035862	2159.44	967.712	3351.18	3.46299	1.79202	8.18098e-17	1.4883e-15
MYOM2	ENSG00000036448	30.1789	46.9981	13.3596	0.284258	-1.81473	0.000182081	0.000960034
USP2	ENSG00000036672	781.672	171.639	1391.71	8.10834	3.01941	1.6484e-69	1.8952e-67
MSR1	ENSG00000038945	537.429	5.20375	1069.65	205.554	7.68338	3.65696e-169	2.30778e-166
RAI14	ENSG00000039560	217.55	67.9764	367.124	5.40076	2.43316	9.61655e-19	1.97749e-17
PQLC2	ENSG00000040487	1764.54	1146.03	2383.05	2.07939	1.05616	8.02838e-15	1.26872e-13
RAB27B	ENSG00000041353	239.518	45.1799	433.857	9.60287	3.26347	1.25794e-46	7.56844e-45
TNC	ENSG00000041982	130.624	47.3282	213.919	4.51991	2.17629	1.38494e-16	2.47979e-15
AIFM2	ENSG00000042286	330.842	204.593	457.091	2.23415	1.15973	2.34194e-10	2.64019e-09
CAPG	ENSG00000042493	36000.8	10178.4	61823.1	6.07397	2.60264	8.09191e-91	1.48254e-88
AP2S1	ENSG00000042753	3058.64	1882.97	4234.3	2.24873	1.16911	1.55856e-13	2.24328e-12
TG	ENSG00000042832	65.7456	23.8701	107.621	4.50862	2.17269	3.32225e-10	3.69691e-09
ADAM28	ENSG00000042980	33.9193	4.46026	63.3784	14.2096	3.82879	4.01653e-12	5.19406e-11
JADE2	ENSG00000043143	1660.93	2349.81	972.05	0.413672	-1.27344	1.15744e-09	1.21109e-08
ZIC2	ENSG00000043355	891.089	1229.3	552.882	0.449755	-1.15279	7.44807e-07	5.70878e-06
ADRB1	ENSG00000043591	632.276	865.457	399.096	0.461139	-1.11673	0.000210818	0.00109991
PHKA2	ENSG00000044446	422.282	578.674	265.89	0.459482	-1.12192	1.15017e-10	1.33371e-09
CNTLN	ENSG00000044459	231.108	327.988	134.228	0.409247	-1.28896	2.20044e-05	0.000137096
DSG2	ENSG00000046604	1279.79	2182.45	377.14	0.172806	-2.53277	1.43608e-63	1.39187e-61
OFD1	ENSG00000046651	545.531	771.441	319.621	0.414317	-1.27119	0.00742164	0.0281388
GPM6B	ENSG00000046653	43.841	70.95	16.732	0.235828	-2.08419	1.22236e-06	9.08945e-06
WDR37	ENSG00000047056	1380.89	826.962	1934.82	2.33967	1.22631	2.08322e-18	4.17497e-17
CTPS2	ENSG00000047230	289.817	388.451	191.184	0.492169	-1.02277	9.31959e-08	8.0078e-07
ATP6V1H	ENSG00000047249	1928.34	1019.25	2837.42	2.78384	1.47708	4.52223e-27	1.41903e-25
SCML1	ENSG00000047634	16.3456	7.68183	25.0094	3.25566	1.70295	0.0135072	0.047958
ARHGAP6	ENSG00000047648	32.9104	10.6547	55.166	5.1776	2.37228	7.86121e-07	6.00437e-06
USP28	ENSG00000048028	208.091	289.169	127.014	0.439236	-1.18693	1.70913e-08	1.5971e-07
HDAC9	ENSG00000048052	811.476	281.323	1341.63	4.76899	2.25368	6.90989e-47	4.18394e-45
TSPAN17	ENSG00000048140	1185.18	622.615	1747.75	2.80711	1.48909	2.94088e-25	8.58326e-24
CC2D2A	ENSG00000048342	38.4515	57.7347	19.1682	0.332006	-1.59072	0.000283149	0.00144564
MRPS10	ENSG00000048544	1822.86	1194.85	2450.87	2.0512	1.03647	4.83145e-14	7.1872e-13
CELF2	ENSG00000048740	4423.56	2447.08	6400.04	2.61537	1.38702	2.75438e-27	8.71035e-26
KITLG	ENSG00000049130	41.1488	25.3567	56.9408	2.24559	1.16709	0.00348651	0.0142645
ADAMTS6	ENSG00000049192	13.0656	3.13869	22.9925	7.32551	2.87293	0.000405063	0.00200645
PER3	ENSG00000049246	46.1625	61.7815	30.5434	0.494377	-1.01632	0.0102436	0.0375497
TNFRSF9	ENSG00000049249	19.1132	0.826027	37.4003	45.2774	5.50072	1.89839e-09	1.95186e-08
HEXB	ENSG00000049860	2236.31	638.721	3833.89	6.00245	2.58555	1.07589e-75	1.44119e-73
PTCD2	ENSG00000049883	115.457	165.937	64.9761	0.39157	-1.35266	5.17943e-07	4.04526e-06
KIAA2022	ENSG00000050030	21.4894	40.7197	2.25911	0.0554795	-4.1719	5.74709e-08	5.07797e-07
LIMA1	ENSG00000050405	957.021	633.762	1280.28	2.02013	1.01445	3.28608e-12	4.28851e-11
LETMD1	ENSG00000050426	1115.24	1583.55	646.931	0.408532	-1.29148	1.20417e-19	2.61238e-18
SLC4A8	ENSG00000050438	53.7423	30.8913	76.5934	2.47945	1.31002	0.00034192	0.00171886
PTGER3	ENSG00000050628	29.3959	0.495544	58.2963	117.641	6.87825	1.07396e-16	1.93518e-15
BCAR1	ENSG00000050820	1000.86	394.732	1606.99	4.0711	2.02542	1.51016e-40	7.68559e-39
RAD51	ENSG00000051180	618.528	870.242	366.813	0.421508	-1.24637	3.74845e-15	6.1107e-14
POLQ	ENSG00000051341	479.072	749.223	208.92	0.278849	-1.84244	0.000473411	0.00231592
CYBA	ENSG00000051523	15285.9	7517.58	23054.1	3.06669	1.61668	1.6606e-37	7.70551e-36
RRP12	ENSG00000052749	1463.01	854.137	2071.89	2.42571	1.27841	4.24049e-20	9.48201e-19
FNIP2	ENSG00000052795	265.768	69.3809	462.156	6.66114	2.73577	6.49251e-38	3.08318e-36
MSMO1	ENSG00000052802	941.062	388.948	1493.17	3.839	1.94073	3.90886e-25	1.12694e-23
ALX4	ENSG00000052850	494.043	802.678	185.407	0.230986	-2.11412	5.53819e-34	2.24356e-32
MCF2L2	ENSG00000053524	21.5891	34.0296	9.14856	0.268841	-1.89518	0.00157089	0.00693567
LAMA3	ENSG00000053747	4485.69	681.172	8290.21	12.1705	3.60532	1.99492e-145	9.13739e-143
ENTPD2	ENSG00000054179	11.4838	3.79929	19.1682	5.04522	2.33492	0.0047671	0.0189311
PLEKHH1	ENSG00000054690	118.501	180.722	56.2793	0.311414	-1.68309	6.26868e-10	6.77647e-09
KCNH2	ENSG00000055118	240.559	461.885	19.2333	0.0416408	-4.58586	8.93051e-22	2.18064e-20
CYFIP2	ENSG00000055163	92.2012	149.583	34.8195	0.232777	-2.10298	7.92556e-12	1.00478e-10
EIF2AK2	ENSG00000055332	1476.95	894.683	2059.21	2.30161	1.20264	1.15971e-18	2.37445e-17
MCOLN3	ENSG00000055732	140.099	214.254	65.9447	0.307787	-1.69999	6.86014e-10	7.36936e-09
PHF21B	ENSG00000056487	44.7573	73.3466	16.168	0.220433	-2.18159	2.03861e-05	0.000127601
TRAF1	ENSG00000056558	288.552	142.231	434.873	3.05751	1.61236	6.15957e-17	1.12997e-15
DCBLD2	ENSG00000057019	213.831	102.915	324.747	3.15549	1.65786	2.22723e-11	2.73568e-10
PRDM1	ENSG00000057657	173.24	53.9354	292.544	5.42398	2.43935	4.33054e-24	1.18477e-22
MTA3	ENSG00000057935	268.222	369.785	166.658	0.450691	-1.14979	5.05526e-09	4.99858e-08
USP13	ENSG00000058056	438.968	660.856	217.079	0.328481	-1.60612	1.09651e-20	2.52955e-19
RASGRF1	ENSG00000058335	882.525	359.545	1405.51	3.90912	1.96684	1.70688e-37	7.90736e-36
TBXAS1	ENSG00000059377	160.061	50.0536	270.069	5.39559	2.43178	1.02573e-22	2.61948e-21
PARP12	ENSG00000059378	810.254	475.263	1145.24	2.4097	1.26885	1.5394e-16	2.7477e-15
TARBP1	ENSG00000059588	2082.72	2952.81	1212.63	0.410669	-1.28395	9.29042e-15	1.46166e-13
SLC2A3	ENSG00000059804	292.019	106.137	477.901	4.5027	2.17079	3.19337e-27	1.0065e-25
GNA15	ENSG00000060558	3657.61	1796.16	5519.06	3.0727	1.61951	1.22867e-34	5.08626e-33
PTPRU	ENSG00000060656	147.306	212.276	82.337	0.387877	-1.36633	6.63744e-05	0.000378798
COL11A1	ENSG00000060718	7.59969	0	15.1994	Inf	Inf	2.87471e-05	0.000175826
MPC1	ENSG00000060762	2186.91	955.482	3418.34	3.57761	1.83899	8.97575e-41	4.60928e-39
SPAG4	ENSG00000061656	74.3153	101.677	46.9536	0.461792	-1.11469	0.000706221	0.0033498
NCKAP1	ENSG00000061676	57.5372	24.2827	90.7916	3.73894	1.90263	1.3322e-07	1.12427e-06
LTK	ENSG00000062524	224.735	410.341	39.128	0.0953548	-3.39055	9.47467e-44	5.23466e-42
ELMO2	ENSG00000062598	1433.47	925.09	1941.85	2.09909	1.06977	2.61255e-14	3.95897e-13
VMP1	ENSG00000062716	2168.29	1154.62	3181.97	2.75586	1.4625	3.61098e-27	1.1356e-25
POLD1	ENSG00000062822	3240.34	4484.78	1995.89	0.445036	-1.168	4.90316e-09	4.85665e-08
MTMR1	ENSG00000063601	320.758	430.825	210.691	0.489042	-1.03197	3.1451e-08	2.85807e-07
GPC1	ENSG00000063660	1069.14	532.174	1606.1	3.018	1.59359	1.55641e-27	4.93844e-26
ADCK1	ENSG00000063761	185.464	121.336	249.592	2.05703	1.04056	4.99819e-06	3.43012e-05
DLX3	ENSG00000064195	367.392	8.92051	725.863	81.3701	6.34643	3.00144e-116	8.35635e-114
DMRT3	ENSG00000064218	49.8848	82.1014	17.6681	0.215199	-2.21626	8.0092e-08	6.94066e-07
ST3GAL6	ENSG00000064225	254.167	70.7857	437.548	6.1813	2.62791	6.16465e-34	2.4867e-32
NGFR	ENSG00000064300	48.2519	18.0886	78.4153	4.33506	2.11605	2.59957e-07	2.10321e-06
HIPK2	ENSG00000064393	1061.95	421.327	1702.57	4.04097	2.0147	1.37938e-41	7.26746e-40
CTSA	ENSG00000064601	3965.73	1231.77	6699.69	5.43907	2.44336	2.46095e-73	3.0923e-71
ABCA7	ENSG00000064687	1505.56	2065.74	945.37	0.457642	-1.12771	6.21164e-16	1.07103e-14
FAR2	ENSG00000064763	2525.69	678.528	4372.85	6.44461	2.68809	2.0305e-82	3.16825e-80
CHI3L2	ENSG00000064886	30.2324	9.99413	50.4707	5.05003	2.33629	3.57146e-06	2.50116e-05
PMS1	ENSG00000064933	253.228	360.53	145.925	0.404751	-1.30489	0.000350906	0.00175998
ANKS1A	ENSG00000064999	1569.88	1042.46	2097.3	2.01188	1.00855	1.64149e-13	2.35906e-12
IPO5	ENSG00000065150	2242.62	3066.16	1419.07	0.462817	-1.11149	3.37203e-17	6.30407e-16
TRAM2	ENSG00000065308	2146.83	1339.81	2953.86	2.20469	1.14057	2.11033e-17	3.99262e-16
NTN1	ENSG00000065320	345.826	478.652	213.001	0.445002	-1.16812	2.65818e-05	0.000163427
MCM10	ENSG00000065328	454.881	642.353	267.408	0.416294	-1.26432	4.57123e-13	6.35408e-12
ANKRD44	ENSG00000065413	299.435	158.914	439.955	2.7685	1.46911	6.46234e-15	1.02926e-13
MYLK	ENSG00000065534	351.942	45.5104	658.374	14.4665	3.85464	4.33232e-73	5.41979e-71
SNAP91	ENSG00000065609	27.2331	46.9152	7.55093	0.160948	-2.63533	1.20974e-06	9.00739e-06
SEC61A2	ENSG00000065665	278.605	153.465	403.744	2.63085	1.39553	2.54445e-12	3.33753e-11
SLC9A7	ENSG00000065923	404.741	95.8948	713.587	7.44136	2.89557	4.52416e-52	3.26914e-50
CTNNA2	ENSG00000066032	45.4285	70.1236	20.7334	0.295669	-1.75795	0.000120871	0.000657083
TIE1	ENSG00000066056	204.357	11.5637	397.15	34.3447	5.10202	1.04763e-69	1.21431e-67
DIP2B	ENSG00000066084	629.041	352.935	905.147	2.56463	1.35875	5.0621e-18	9.95522e-17
ZMYND12	ENSG00000066185	112.91	154.373	71.4462	0.462814	-1.11149	3.92187e-05	0.000234125
NGEF	ENSG00000066248	193.857	95.2349	292.479	3.07113	1.61877	5.68149e-13	7.83218e-12
ELOVL1	ENSG00000066322	6094.98	3817.65	8372.31	2.19305	1.13294	2.90402e-15	4.78077e-14
SPI1	ENSG00000066336	8711.99	5690.29	11733.7	2.06206	1.04408	1.88092e-16	3.34467e-15
MPPED2	ENSG00000066382	14.472	26.927	2.01694	0.0749042	-3.73881	1.71576e-05	0.000108711
CLDN18	ENSG00000066405	18.9529	32.1296	5.77615	0.179776	-2.47572	0.00014679	0.000786369
KIF26A	ENSG00000066735	255.251	393.412	117.091	0.297631	-1.7484	1.35111e-09	1.40597e-08
IDI1	ENSG00000067064	1069.87	635.002	1504.74	2.36966	1.24468	5.84029e-18	1.1446e-16
SP100	ENSG00000067066	1098.48	683.892	1513.07	2.21244	1.14564	2.29858e-11	2.81966e-10
KLF6	ENSG00000067082	1131.54	404.806	1858.27	4.59052	2.19866	2.87798e-49	1.90067e-47
PPAP2A	ENSG00000067113	84.6765	51.293	118.06	2.30168	1.20269	7.21914e-05	0.00040905
PHKA1	ENSG00000067177	109.912	199.719	20.1044	0.100663	-3.31239	1.61541e-25	4.75384e-24
PKM	ENSG00000067225	47276.4	14997.2	79555.6	5.3047	2.40727	2.65974e-78	3.66656e-76
TRO	ENSG00000067445	137.759	194.68	80.8369	0.415229	-1.26802	5.04963e-07	3.94832e-06
SYT1	ENSG00000067715	66.5024	0.826027	132.179	160.017	7.32209	6.41496e-35	2.69087e-33
NAV3	ENSG00000067798	41.6387	59.1391	24.1383	0.408161	-1.29279	0.00267585	0.0112343
HYAL2	ENSG00000068001	340.514	189.394	491.633	2.59582	1.37619	1.22139e-13	1.77055e-12
IFI35	ENSG00000068079	1583.12	614.027	2552.21	4.15651	2.05537	2.25819e-47	1.39713e-45
MEF2A	ENSG00000068305	955.083	390.681	1519.48	3.88932	1.95952	7.48274e-39	3.67638e-37
TFE3	ENSG00000068323	1590.81	899.155	2282.46	2.53845	1.34395	8.83947e-22	2.16149e-20
TBC1D25	ENSG00000068354	605.432	326.425	884.439	2.70947	1.43801	1.45775e-18	2.96966e-17
ACSL4	ENSG00000068366	1508.2	762.362	2254.03	2.95664	1.56396	2.61413e-29	8.9874e-28
PRR11	ENSG00000068489	1740.35	2511.78	968.92	0.38575	-1.37426	3.39969e-17	6.35161e-16
LAPTM4A	ENSG00000068697	1155.68	693.155	1618.2	2.33454	1.22314	7.91189e-08	6.86051e-07
CYFIP1	ENSG00000068793	5648.53	2733.55	8563.5	3.13274	1.64743	2.71248e-37	1.24441e-35
MAST4	ENSG00000069020	273.095	72.2723	473.918	6.55739	2.71312	1.15441e-37	5.42764e-36
BCL3	ENSG00000069399	617.415	302.967	931.862	3.07579	1.62096	1.62048e-23	4.28875e-22
KCNAB2	ENSG00000069424	10269.9	6147.3	14392.5	2.34127	1.22729	2.66008e-22	6.63222e-21
GAL	ENSG00000069482	426.402	82.0181	770.785	9.39774	3.23231	3.22117e-63	3.11139e-61
RORA	ENSG00000069667	11.328	18.8318	3.82423	0.203073	-2.29993	0.0130804	0.046607
DRD4	ENSG00000069696	15.9548	26.1009	5.80866	0.222546	-2.16782	0.00219462	0.00939162
TGFBR3	ENSG00000069702	85.2709	142.644	27.8975	0.195574	-2.35421	3.97224e-13	5.55136e-12
GNB5	ENSG00000069966	523.26	765.756	280.764	0.36665	-1.44753	1.39981e-18	2.85368e-17
PFN2	ENSG00000070087	96.5348	179.403	13.6668	0.0761793	-3.71446	1.0748e-07	9.17682e-07
SPTB	ENSG00000070182	87.333	122.243	52.4226	0.428838	-1.2215	3.81114e-05	0.000228042
FSTL3	ENSG00000070404	180.613	246.716	114.511	0.46414	-1.10737	9.97568e-07	7.51431e-06
JMJD6	ENSG00000070495	991.674	612.043	1371.3	2.24053	1.16384	1.2872e-15	2.15785e-14
WIPI1	ENSG00000070540	91.6359	41.4635	141.808	3.42007	1.77403	0.000368939	0.00184262
NDST1	ENSG00000070614	1729.84	329.645	3130.03	9.49513	3.24719	3.33991e-104	7.46825e-102
ASNS	ENSG00000070669	3252.71	4751.81	1753.6	0.369037	-1.43816	7.22405e-16	1.23658e-14
ST6GALNAC2	ENSG00000070731	160.981	58.396	263.566	4.51342	2.17422	5.12449e-19	1.06847e-17
TESK2	ENSG00000070759	316.551	100.934	532.167	5.27241	2.39846	9.94937e-34	3.98508e-32
PTPN21	ENSG00000070778	59.1685	33.4516	84.8854	2.53756	1.34344	0.00021549	0.00112181
CAMK2A	ENSG00000070808	4.79704	0.413013	9.18107	22.2295	4.4744	0.00721562	0.0274273
OSBPL3	ENSG00000070882	408.916	116.296	701.536	6.03231	2.59271	3.83998e-44	2.13819e-42
ATP2B1	ENSG00000070961	543.712	176.259	911.165	5.16945	2.37001	1.55819e-44	8.81465e-43
NCK2	ENSG00000071051	2676.95	1624.93	3728.97	2.29485	1.1984	7.93227e-20	1.74621e-18
MAP4K4	ENSG00000071054	4881.27	1860.15	7902.39	4.24825	2.08687	7.99087e-58	6.69395e-56
WDR1	ENSG00000071127	17134.4	9450.53	24818.3	2.62613	1.39294	2.20058e-28	7.24126e-27
ARHGAP10	ENSG00000071205	227.687	56.5789	398.795	7.04848	2.81731	4.1792e-36	1.84287e-34
VASH1	ENSG00000071246	1145.75	378.376	1913.12	5.05614	2.33804	1.10758e-55	8.93556e-54
TRIP13	ENSG00000071539	870.546	1164.12	576.973	0.495631	-1.01266	1.21122e-11	1.51192e-10
ATP6AP1	ENSG00000071553	8546.99	3592.81	13501.2	3.75782	1.9099	1.38905e-49	9.28148e-48
HLTF	ENSG00000071794	326.13	498.3	153.96	0.308971	-1.69446	1.36058e-06	1.0041e-05
CYBRD1	ENSG00000071967	151.126	236.888	65.3629	0.275923	-1.85766	4.8398e-14	7.19585e-13
LPHN1	ENSG00000072071	889.665	1238.71	540.621	0.436439	-1.19615	9.05951e-16	1.53595e-14
ACTN1	ENSG00000072110	19016.6	11700.7	26332.4	2.2505	1.17025	2.85784e-21	6.8314e-20
LIMS2	ENSG00000072163	164.903	25.192	304.613	12.0917	3.59594	1.77531e-40	8.98666e-39
SPEG	ENSG00000072195	31.2871	44.5193	18.0549	0.405553	-1.30204	0.00629817	0.0243076
TFRC	ENSG00000072274	2197.68	1028.16	3367.2	3.27498	1.71149	8.10605e-37	3.6539e-35
UBE2D1	ENSG00000072401	127.234	70.9515	183.517	2.58652	1.37101	0.000925928	0.00427553
RHOBTB1	ENSG00000072422	71.7812	104.402	39.1605	0.375094	-1.41468	3.74562e-05	0.000224358
NFATC3	ENSG00000072736	1787.53	1115.63	2459.42	2.20451	1.14046	9.48447e-17	1.71664e-15
ACAP1	ENSG00000072818	412.339	584.459	240.219	0.411011	-1.28275	2.33485e-07	1.90313e-06
NDE1	ENSG00000072864	1660.24	1032.05	2288.42	2.21736	1.14884	1.56802e-16	2.79527e-15
XRCC1	ENSG00000073050	3096.28	1768.98	4423.59	2.50064	1.3223	5.88257e-24	1.60013e-22
MCM2	ENSG00000073111	5465.73	7819.64	3111.82	0.39795	-1.32934	2.34063e-15	3.88254e-14
PANX2	ENSG00000073150	222.897	128.934	316.86	2.45753	1.29721	6.83425e-10	7.34591e-09
TP63	ENSG00000073282	11.0229	18.254	3.79172	0.207719	-2.26729	0.00842434	0.0315197
CLCN4	ENSG00000073464	995.823	268.439	1723.21	6.41936	2.68243	4.31001e-67	4.65383e-65
NLE1	ENSG00000073536	250.963	338.896	163.029	0.48106	-1.05571	1.74429e-07	1.44415e-06
GSDMB	ENSG00000073605	133.076	209.63	56.5215	0.269625	-1.89097	9.45418e-13	1.28214e-11
ADAM11	ENSG00000073670	41.7333	69.3805	14.0861	0.203027	-2.30026	4.38453e-07	3.45004e-06
FERMT2	ENSG00000073712	94.5786	3.13869	186.018	59.2663	5.88914	8.41138e-23	2.15973e-21
ST6GAL1	ENSG00000073849	1072.03	521.766	1622.29	3.10923	1.63656	2.20742e-28	7.25536e-27
PICALM	ENSG00000073921	1920.24	1121.25	2719.24	2.42519	1.2781	2.55954e-21	6.13901e-20
PPP2R2C	ENSG00000074211	22.434	11.6462	33.2218	2.85259	1.51227	0.00867088	0.0323654
CDHR2	ENSG00000074276	20.1098	33.782	6.43763	0.190564	-2.39166	0.000106239	0.000583669
MGLL	ENSG00000074416	215.678	79.1285	352.228	4.45135	2.15424	1.60342e-22	4.03669e-21
NUAK1	ENSG00000074590	260.005	123.814	396.196	3.19994	1.67805	1.22868e-16	2.20556e-15
IPCEF1	ENSG00000074706	525.583	160.319	890.847	5.55671	2.47423	2.15895e-46	1.28802e-44
SLC12A1	ENSG00000074803	5.55346	10.6551	0.451822	0.0424043	-4.55965	0.00600167	0.023274
C19orf10	ENSG00000074842	2598.97	1635.83	3562.11	2.17755	1.12271	9.06326e-18	1.75685e-16
TUBE1	ENSG00000074935	713.346	1015.52	411.168	0.404883	-1.30442	4.66894e-17	8.65413e-16
TXK	ENSG00000074966	107.988	45.4282	170.548	3.75422	1.90851	8.22494e-12	1.04041e-10
SEMA3A	ENSG00000075213	30.0064	15.528	44.4849	2.86481	1.51844	0.00123533	0.00556487
GTSE1	ENSG00000075218	1104.97	1499.71	710.233	0.473579	-1.07832	6.50007e-14	9.55924e-13
GRAMD4	ENSG00000075240	3319.41	1864.3	4774.52	2.56103	1.35672	3.43877e-25	9.9851e-24
ADD2	ENSG00000075340	919.314	1531.35	307.277	0.200658	-2.31719	4.7464e-38	2.26535e-36
RASAL2	ENSG00000075391	1953.45	1286.93	2619.97	2.03583	1.02561	6.61301e-15	1.05267e-13
FNDC3B	ENSG00000075420	3253.05	1311.88	5194.23	3.95939	1.98528	6.21189e-51	4.3773e-49
FSCN1	ENSG00000075618	19482.8	5530.31	33435.2	6.04581	2.59594	1.44603e-88	2.53484e-86
ACTB	ENSG00000075624	176720	100954	252487	2.50102	1.32252	8.60452e-15	1.35751e-13
MOCOS	ENSG00000075643	152.502	226.151	78.8525	0.348672	-1.52006	5.39808e-10	5.87561e-09
WDR62	ENSG00000075702	653.923	901.712	406.133	0.450402	-1.15071	9.60937e-14	1.40158e-12
RAB7A	ENSG00000075785	8950.03	5693.65	12206.4	2.14386	1.10021	1.80595e-18	3.64501e-17
BCAP29	ENSG00000075790	611.07	361.11	861.031	2.3844	1.25363	1.60634e-15	2.67704e-14
SEC31B	ENSG00000075826	349.037	514.488	183.586	0.356832	-1.48668	0.000412283	0.00203937
PLXNA2	ENSG00000076356	25.5379	5.86436	45.2113	7.70951	2.94664	2.08592e-05	0.000130418
SPAG5	ENSG00000076382	649.736	910.795	388.678	0.426746	-1.22855	1.05258e-14	1.64963e-13
TPD52	ENSG00000076554	1770.82	2655.23	886.423	0.333841	-1.58277	1.86583e-30	6.65653e-29
ACACB	ENSG00000076555	388.338	631.702	144.974	0.229498	-2.12345	7.49748e-30	2.61244e-28
PAG1	ENSG00000076641	963.842	503.426	1424.26	2.82913	1.50036	1.94668e-24	5.41447e-23
GPC4	ENSG00000076716	757.821	258.859	1256.78	4.85508	2.2795	1.38072e-39	6.87888e-38
MBNL3	ENSG00000076770	193.713	284.709	102.716	0.360775	-1.47083	7.09421e-11	8.36634e-10
IL4R	ENSG00000077238	1546.86	407.12	2686.6	6.59904	2.72226	3.12619e-77	4.28877e-75
POLD3	ENSG00000077514	823.056	1148.58	497.528	0.433166	-1.20701	7.14791e-15	1.13464e-13
CAPZB	ENSG00000077549	7950.28	5106.14	10794.4	2.11401	1.07998	7.5554e-18	1.47361e-16
GPR137B	ENSG00000077585	341.757	190.718	492.797	2.5839	1.36955	1.80458e-13	2.58559e-12
JADE1	ENSG00000077684	441.088	650.201	231.974	0.356773	-1.48692	2.1717e-17	4.09881e-16
FGFR1	ENSG00000077782	2713.68	1313.63	4113.72	3.13158	1.64689	1.104e-34	4.58455e-33
SMC1B	ENSG00000077935	93.0615	164.034	22.0888	0.13466	-2.89261	4.38417e-05	0.000259595
FBLN1	ENSG00000077942	66.4465	102.834	30.0591	0.292307	-1.77444	1.22386e-07	1.03964e-06
NEBL	ENSG00000078114	36.0297	68.7195	3.3399	0.0486019	-4.36284	1.36985e-10	1.57621e-09
ACER3	ENSG00000078124	384.946	209.217	560.675	2.67988	1.42217	1.39358e-15	2.33205e-14
C12orf5	ENSG00000078237	24.4523	9.00304	39.9016	4.43201	2.14796	0.000152026	0.00081273
ADCY2	ENSG00000078295	20.4151	34.3601	6.47014	0.188304	-2.40887	0.000157515	0.000840812
SDF4	ENSG00000078808	6737.06	3976.32	9497.8	2.38859	1.25616	6.86594e-23	1.76932e-21
MYH7B	ENSG00000078814	74.2573	117.534	30.9806	0.263589	-1.92364	4.10886e-05	0.000244414
TOLLIP	ENSG00000078902	2352.42	1356.66	3348.19	2.46797	1.30332	1.29028e-22	3.27449e-21
OSBPL6	ENSG00000079156	70.4873	102.75	38.2244	0.372012	-1.42658	2.66162e-05	0.000163568
SLC1A3	ENSG00000079215	165.981	8.25955	323.702	39.1912	5.29246	5.37811e-62	5.074e-60
SAR1A	ENSG00000079332	1739.09	981.579	2496.61	2.54346	1.34679	2.48898e-22	6.2275e-21
LIPE	ENSG00000079435	76.4551	115.058	37.8522	0.328983	-1.60392	2.56821e-07	2.08021e-06
PGM1	ENSG00000079739	434.133	727.684	140.583	0.193192	-2.37189	1.93719e-11	2.39081e-10
EPB41L2	ENSG00000079819	2217.03	3021.63	1412.43	0.467441	-1.09714	3.8378e-16	6.68625e-15
PTPRH	ENSG00000080031	133.832	216.322	51.3418	0.237339	-2.07498	1.97211e-13	2.81426e-12
SESN1	ENSG00000080546	893.231	524.322	1262.14	2.40718	1.26735	3.1759e-17	5.94916e-16
COL5A3	ENSG00000080573	34.4291	3.88218	64.9761	16.737	4.06497	5.18751e-13	7.18259e-12
HSP90AA1	ENSG00000080824	12444.8	8143.78	16745.8	2.05628	1.04003	6.47131e-12	8.27803e-11
DLGAP4	ENSG00000080845	1830.07	853.643	2806.49	3.28767	1.71706	4.75543e-35	2.00363e-33
NDC80	ENSG00000080986	497.68	700.99	294.369	0.419933	-1.25177	0.00012695	0.000687869
MAGI3	ENSG00000081026	174.074	252	96.1484	0.381542	-1.39009	1.35275e-05	8.70109e-05
CXCL2	ENSG00000081041	9.14402	3.05616	15.2319	4.98401	2.31731	0.0115688	0.041803
COL4A4	ENSG00000081052	25.0803	8.17702	41.9836	5.13434	2.36018	2.01038e-05	0.000125945
TCF7	ENSG00000081059	130.572	198.976	62.1676	0.312437	-1.67836	4.13594e-11	4.96838e-10
OSTM1	ENSG00000081087	813.084	333.936	1292.23	3.86969	1.95222	1.85758e-31	6.84197e-30
PTPRC	ENSG00000081237	2290.92	1493.09	3088.75	2.06869	1.04872	1.34141e-15	2.2474e-14
UBA5	ENSG00000081307	480.069	294.454	665.683	2.26073	1.17679	1.07721e-12	1.45669e-11
STK17B	ENSG00000081320	746.965	242.422	1251.51	5.16253	2.36808	9.32699e-49	6.04721e-47
ZNF506	ENSG00000081665	215.347	326.752	103.942	0.318105	-1.65242	1.74546e-14	2.69976e-13
ATP8B1	ENSG00000081923	40.3517	14.3719	66.3315	4.61538	2.20645	4.41774e-07	3.47232e-06
IL12RB2	ENSG00000081985	247.178	355.498	138.858	0.390603	-1.35622	3.07017e-11	3.73391e-10
FYB	ENSG00000082074	208.065	127.197	288.933	2.27155	1.18367	7.97222e-05	0.000448396
STRADB	ENSG00000082146	805.819	527.55	1084.09	2.05495	1.0391	5.77622e-06	3.92612e-05
DLG3	ENSG00000082458	283.479	47.9885	518.97	10.8145	3.43489	1.96021e-55	1.56806e-53
NFE2L1	ENSG00000082641	5410.16	3458.5	7361.82	2.12862	1.08992	6.53507e-18	1.27636e-16
ITGB5	ENSG00000082781	3938.6	389.114	7488.09	19.2439	4.26633	1.29274e-183	1.04889e-180
RNF13	ENSG00000082996	512.429	268.025	756.832	2.82374	1.49761	8.9829e-20	1.96986e-18
ZCCHC6	ENSG00000083223	654.214	274.219	1034.21	3.77148	1.91513	2.40685e-33	9.53272e-32
PLOD1	ENSG00000083444	3929.95	2131.01	5728.89	2.68835	1.42672	1.75243e-27	5.55419e-26
P2RX5	ENSG00000083454	39.0353	21.2273	56.8433	2.67784	1.42107	0.00114054	0.00517231
CYLD	ENSG00000083799	612.855	399.434	826.276	2.06862	1.04867	1.52652e-11	1.89385e-10
ZMPSTE24	ENSG00000084073	9241.74	5548.36	12935.1	2.33134	1.22116	3.50696e-15	5.74009e-14
HAL	ENSG00000084110	412.286	673.08	151.492	0.225072	-2.15154	6.47188e-32	2.42785e-30
SSH1	ENSG00000084112	1247.73	698.936	1796.52	2.57037	1.36197	1.62198e-21	3.91341e-20
KIAA1467	ENSG00000084444	176.802	80.037	273.568	3.41801	1.77316	5.28095e-14	7.81086e-13
AGBL5	ENSG00000084693	865.071	1168.34	561.807	0.480861	-1.05631	1.22458e-12	1.64424e-11
EFR3B	ENSG00000084710	34.9024	5.03833	64.7664	12.8547	3.68423	3.72628e-12	4.83412e-11
MAPRE3	ENSG00000084764	224.003	128.935	319.072	2.47467	1.30723	4.42736e-10	4.87318e-09
CAD	ENSG00000084774	2206.14	2966.73	1445.55	0.487254	-1.03725	1.61859e-07	1.34636e-06
CD59	ENSG00000085063	574.18	262.822	885.538	3.36934	1.75247	1.51588e-26	4.68421e-25
CD82	ENSG00000085117	11362.7	2981.41	19744	6.62237	2.72735	7.31774e-97	1.48435e-94
ABCB1	ENSG00000085563	89.4085	1.81711	177	97.4071	6.60596	8.10929e-43	4.42011e-41
WNT11	ENSG00000085741	38.1489	55.9186	20.3791	0.364442	-1.45624	0.00162003	0.00713265
ORC1	ENSG00000085840	1531.32	2055.35	1007.3	0.490085	-1.0289	7.58188e-10	8.08828e-09
ATG16L1	ENSG00000085978	755.823	399.604	1112.04	2.78286	1.47657	1.05107e-21	2.56208e-20
RAD54L	ENSG00000085999	972.303	1539.78	404.828	0.262913	-1.92734	1.70783e-18	3.45188e-17
CHMP5	ENSG00000086065	1789.97	1156.85	2423.1	2.09458	1.06666	1.49978e-15	2.50534e-14
SEPHS1	ENSG00000086475	1119.66	1529.28	710.038	0.464296	-1.10688	1.26418e-14	1.97362e-13
CEACAM6	ENSG00000086548	192.492	96.4736	288.51	2.99056	1.58042	1.56916e-12	2.09305e-11
TXLNG	ENSG00000086712	300.478	403.979	196.978	0.487594	-1.03625	9.49516e-08	8.14633e-07
LAT2	ENSG00000086730	15346.9	7562.74	23131.1	3.05856	1.61285	1.22869e-37	5.75781e-36
PPP1R15A	ENSG00000087074	3280.01	1485.09	5074.93	3.41725	1.77284	3.89365e-41	2.01406e-39
FTL	ENSG00000087086	92105.8	59293.5	124918	2.10678	1.07504	7.70846e-18	1.50038e-16
MMP2	ENSG00000087245	698.391	365.905	1030.88	2.81734	1.49433	5.23269e-21	1.23523e-19
CASS4	ENSG00000087589	584.432	84.9925	1083.87	12.7526	3.67271	3.41601e-88	5.91511e-86
SULT2B1	ENSG00000088002	25.4799	48.0717	2.88808	0.0600784	-4.05701	7.47919e-10	7.98775e-09
TPX2	ENSG00000088325	2762.38	3963	1561.77	0.394088	-1.34341	9.85264e-25	2.78127e-23
EPB41L1	ENSG00000088367	104.176	49.971	158.381	3.16946	1.66424	3.83493e-09	3.82792e-08
ATRN	ENSG00000088812	1825.18	806.888	2843.48	3.524	1.81722	2.43958e-39	1.21016e-37
SMOX	ENSG00000088826	268.396	95.565	441.227	4.61704	2.20697	1.67715e-26	5.16011e-25
SIGLEC1	ENSG00000088827	424.243	50.1368	798.349	15.9234	3.99308	1.49485e-84	2.48251e-82
C20orf194	ENSG00000088854	799.409	515.071	1083.75	2.10407	1.07318	3.59673e-13	5.03649e-12
EBF4	ENSG00000088881	54.0443	93.5832	14.5054	0.155	-2.68966	5.16981e-08	4.59219e-07
CPXM1	ENSG00000088882	638.434	264.393	1012.48	3.82943	1.93713	6.81199e-33	2.63911e-31
PLK1S1	ENSG00000088970	324.515	472.53	176.501	0.373524	-1.42073	0.000297834	0.00151494
P2RX7	ENSG00000089041	54.7056	98.4554	10.9558	0.111277	-3.16777	1.13702e-13	1.655e-12
RBBP9	ENSG00000089050	60.6252	81.6055	39.6449	0.485811	-1.04153	0.00578315	0.0225157
OAS1	ENSG00000089127	1449.49	242.091	2656.88	10.9747	3.45611	1.60715e-111	4.03893e-109
PXN	ENSG00000089159	2054.79	741.559	3368.02	4.54182	2.18327	4.78563e-55	3.78558e-53
CHGB	ENSG00000089199	10.9389	1.32157	20.5562	15.5544	3.95925	6.28856e-05	0.000360846
FXYD5	ENSG00000089327	3613.79	2054.78	5172.8	2.51745	1.33196	5.56313e-13	7.67646e-12
CMTM1	ENSG00000089505	57.4288	28.082	86.7756	3.09008	1.62764	0.000715065	0.00338892
LTBP4	ENSG00000090006	1464.75	1953.18	976.315	0.499859	-1.00041	2.30342e-06	1.65434e-05
SLC9A1	ENSG00000090020	1026.1	572.731	1479.47	2.58318	1.36915	2.72616e-20	6.14424e-19
RGS1	ENSG00000090104	635.115	4.12977	1266.1	306.579	8.26011	3.42083e-192	3.03577e-189
NDUFB2	ENSG00000090266	435.763	272.652	598.874	2.19647	1.13519	1.50662e-07	1.26135e-06
ICAM1	ENSG00000090339	1054.28	86.1483	2022.41	23.4759	4.55311	1.97109e-148	9.32915e-146
MUL1	ENSG00000090432	711.195	465.023	957.367	2.05875	1.04177	6.29704e-10	6.80196e-09
SPG21	ENSG00000090487	1937.89	1230.29	2645.48	2.15029	1.10453	1.2962e-07	1.09715e-06
DNAJB11	ENSG00000090520	1212.77	780.124	1645.42	2.10918	1.07668	1.85595e-14	2.86131e-13
LEPREL1	ENSG00000090530	14.8789	2.97362	26.7842	9.00725	3.17109	6.35644e-05	0.000364299
GNPTG	ENSG00000090581	1444.02	938.466	1949.57	2.0774	1.05478	1.86934e-14	2.88038e-13
CD209	ENSG00000090659	1309.12	78.6336	2539.6	32.2966	5.01331	3.70485e-59	3.21744e-57
MCOLN1	ENSG00000090674	740.079	316.514	1163.64	3.67645	1.87831	9.61211e-33	3.70876e-31
AARS	ENSG00000090861	8407.06	12136.7	4677.47	0.3854	-1.37557	1.8571e-15	3.0877e-14
KIF4A	ENSG00000090889	833.248	1122.24	544.254	0.48497	-1.04403	7.5216e-12	9.55271e-11
PITPNM2	ENSG00000090975	271.271	162.303	380.238	2.34276	1.22821	4.36858e-10	4.81221e-09
OSBPL8	ENSG00000091039	1286.06	710.9	1861.22	2.61812	1.38853	3.13603e-13	4.41532e-12
NRCAM	ENSG00000091129	12.8154	1.73458	23.8961	13.7763	3.78411	2.55815e-05	0.000157775
WDR7	ENSG00000091157	583.801	385.974	781.629	2.02508	1.01798	1.9872e-10	2.25729e-09
CMTM6	ENSG00000091317	2727.98	1040.88	4415.08	4.24167	2.08463	3.28687e-53	2.43709e-51
ITGA6	ENSG00000091409	790.326	52.9443	1527.71	28.855	4.85075	2.1878e-143	9.55833e-141
RAPGEF4	ENSG00000091428	12.8849	25.7697	0	0	#NAME?	1.1919e-07	1.0134e-06
SEL1L3	ENSG00000091490	1288.75	1897.58	679.928	0.358313	-1.48071	1.45443e-25	4.29343e-24
CDV3	ENSG00000091527	4172.37	2530.76	5813.99	2.29733	1.19996	1.21184e-20	2.79106e-19
NLRP1	ENSG00000091592	56.1833	84.7438	27.6228	0.325957	-1.61725	9.02704e-06	5.96162e-05
HAUS4	ENSG00000092036	506.356	701.745	310.968	0.443135	-1.17418	4.12701e-13	5.76483e-12
SLC7A8	ENSG00000092068	135.209	12.3893	258.029	20.8267	4.38036	5.04901e-23	1.30942e-21
GEMIN2	ENSG00000092208	160.336	222.184	98.4871	0.443269	-1.17375	3.40029e-07	2.71393e-06
SEMA6A	ENSG00000092421	92.6519	146.693	38.6112	0.263211	-1.92571	1.81721e-10	2.07083e-09
TYRO3	ENSG00000092445	302.652	417.362	187.941	0.450307	-1.15102	1.38093e-09	1.43647e-08
WDR76	ENSG00000092470	547.924	787.396	308.452	0.391737	-1.35204	8.58407e-17	1.55864e-15
PHGDH	ENSG00000092621	18561.1	28650.7	8471.47	0.295681	-1.75789	1.71034e-12	2.27496e-11
COL9A3	ENSG00000092758	276.531	459.156	93.9072	0.204522	-2.28968	1.49875e-27	4.7608e-26
MYL6	ENSG00000092841	13694.8	6218.23	21171.4	3.40473	1.76754	6.17922e-45	3.53785e-43
DPYSL2	ENSG00000092964	2696.96	1369.05	4024.86	2.9399	1.55577	3.904e-31	1.41954e-29
TGFB2	ENSG00000092969	18.169	2.1476	34.1905	15.9203	3.9928	1.73269e-07	1.43589e-06
CDC45	ENSG00000093009	875.322	1258.36	492.28	0.391206	-1.354	1.61038e-19	3.47505e-18
HDAC6	ENSG00000094631	1153.31	1559.27	747.359	0.479301	-1.061	3.21084e-12	4.19418e-11
PTGS1	ENSG00000095303	11098.5	678.702	21518.3	31.7051	4.98664	7.86765e-252	1.39641e-248
TBC1D2	ENSG00000095383	441.168	129.347	752.99	5.82149	2.54139	2.80403e-44	1.57369e-42
DFNB31	ENSG00000095397	589.626	84.9099	1094.34	12.8883	3.68799	5.3206e-89	9.44339e-87
CREM	ENSG00000095794	222.918	82.1017	363.734	4.43028	2.1474	4.00102e-23	1.04431e-21
TPSD1	ENSG00000095917	4.93753	0	9.87505	Inf	Inf	0.00567956	0.022158
TREM2	ENSG00000095970	4418.74	281.903	8555.57	30.3493	4.92359	2.8388e-229	4.03082e-226
ITPR3	ENSG00000096433	219.473	314.364	124.581	0.396294	-1.33536	1.10767e-09	1.16115e-08
SH3GLB1	ENSG00000097033	3253.13	1139.42	5366.84	4.71014	2.23577	1.05905e-61	9.95861e-60
CDC7	ENSG00000097046	427.912	621.203	234.62	0.377687	-1.40474	9.23238e-06	6.0845e-05
SYDE2	ENSG00000097096	42.6687	62.4425	22.8949	0.366656	-1.4475	0.00028574	0.00145786
ERMP1	ENSG00000099219	2827.42	1428.77	4226.08	2.95786	1.56455	3.13318e-24	8.63845e-23
NRP1	ENSG00000099250	1886.53	56.0008	3717.06	66.3751	6.05257	6.69243e-246	1.11795e-242
PRTFDC1	ENSG00000099256	36.3094	59.4689	13.1499	0.221123	-2.17708	3.77363e-06	2.63431e-05
H2AFY2	ENSG00000099284	82.6489	125.96	39.3377	0.312303	-1.67898	1.40975e-07	1.1862e-06
HSD3B7	ENSG00000099377	588.924	172.877	1004.97	5.81322	2.53934	5.85405e-50	3.95817e-48
2019-03-02	ENSG00000099785	498.823	237.798	759.847	3.19535	1.67597	7.79208e-23	2.00253e-21
PALM	ENSG00000099864	389.358	661.029	117.688	0.178038	-2.48975	1.45497e-09	1.51183e-08
ARVCF	ENSG00000099889	36.707	56.1651	17.2488	0.307109	-1.70318	0.000389855	0.00193788
CECR2	ENSG00000099954	70.8177	109.606	32.0289	0.292217	-1.77489	3.64196e-07	2.89704e-06
OSM	ENSG00000099985	120.093	61.6179	178.568	2.89799	1.53505	2.42762e-07	1.97478e-06
SUSD2	ENSG00000099994	10.5813	1.81711	19.3454	10.6462	3.41227	0.000897102	0.00415662
YPEL1	ENSG00000100027	47.6196	82.2664	12.9728	0.157692	-2.66482	1.03495e-09	1.08814e-08
PRODH	ENSG00000100033	27.3307	37.9944	16.667	0.43867	-1.18879	0.0129135	0.0460875
SLC35E4	ENSG00000100036	100.733	14.0414	187.424	13.348	3.73855	2.94724e-29	1.01204e-27
CYTH4	ENSG00000100055	6124.08	3564.81	8683.36	2.43586	1.28443	7.66801e-24	2.07387e-22
SH3BP1	ENSG00000100092	2206.91	1101.03	3312.79	3.00883	1.5892	3.13511e-31	1.14289e-29
LGALS1	ENSG00000100097	52726.9	16545	88908.8	5.37375	2.42593	1.69469e-80	2.53293e-78
HPS4	ENSG00000100099	1498.54	2282.72	714.364	0.312944	-1.67602	3.85482e-32	1.45765e-30
PATZ1	ENSG00000100105	1302.61	1877.6	727.623	0.387528	-1.36763	1.65316e-13	2.37463e-12
CRYBB1	ENSG00000100122	136.3	79.0445	193.555	2.44868	1.292	2.40674e-07	1.95948e-06
PICK1	ENSG00000100151	451.032	276.12	625.944	2.26693	1.18074	2.22489e-12	2.93598e-11
CENPM	ENSG00000100162	615.209	890.808	339.61	0.381238	-1.39124	3.38417e-18	6.71114e-17
JOSD1	ENSG00000100221	1446.5	881.808	2011.19	2.28076	1.18951	1.25951e-17	2.42164e-16
SUN2	ENSG00000100242	8656.17	3635.18	13677.2	3.76244	1.91167	1.10751e-50	7.74656e-49
MIOX	ENSG00000100253	23.0549	40.0591	6.05083	0.151048	-2.72692	1.73384e-05	0.000109758
PACSIN2	ENSG00000100266	3392.16	1874.62	4909.71	2.61905	1.38904	1.12529e-26	3.48864e-25
TOM1	ENSG00000100284	1757.4	609.155	2905.65	4.76998	2.25398	2.9541e-57	2.44579e-55
BIK	ENSG00000100290	1965.77	1221.45	2710.1	2.21876	1.14975	5.36923e-17	9.90099e-16
HMOX1	ENSG00000100292	654.12	95.5654	1212.67	12.6895	3.66556	9.95701e-92	1.87258e-89
ARSA	ENSG00000100299	1049.18	578.758	1519.61	2.62564	1.39267	2.75415e-21	6.59464e-20
RASD2	ENSG00000100302	108.724	12.2246	205.223	16.7876	4.06933	3.52665e-34	1.43687e-32
TAB1	ENSG00000100324	926.605	594.451	1258.76	2.11752	1.08237	2.24922e-13	3.20168e-12
APOL1	ENSG00000100342	481.147	240.686	721.608	2.99813	1.58406	6.45343e-21	1.51709e-19
MYH9	ENSG00000100345	47997.9	27261.9	68733.9	2.52125	1.33414	2.31289e-27	7.32233e-26
UPK3A	ENSG00000100373	8.92095	17.1804	0.661477	0.0385018	-4.69893	0.000117037	0.000638176
KCTD17	ENSG00000100379	364.835	239.118	490.552	2.05151	1.03668	9.72062e-09	9.31016e-08
IL2RB	ENSG00000100385	257.329	52.0364	462.622	8.89035	3.15224	5.19555e-45	2.9867e-43
ABHD4	ENSG00000100439	1057.43	260.182	1854.69	7.12842	2.83358	1.98953e-73	2.51105e-71
CTSG	ENSG00000100448	35881	60606.4	11155.6	0.184066	-2.4417	1.07084e-79	1.54365e-77
GZMB	ENSG00000100453	36.9772	1.73458	72.2198	41.6352	5.37973	2.14569e-17	4.05681e-16
COCH	ENSG00000100473	44.0498	61.8648	26.2348	0.424067	-1.23763	0.00124538	0.00560747
POLE2	ENSG00000100479	159.366	241.429	77.302	0.320185	-1.64302	3.81576e-12	4.94343e-11
PYGL	ENSG00000100504	7681.42	3954.24	11408.6	2.88515	1.52865	2.77919e-33	1.09921e-31
TRIM9	ENSG00000100505	128.317	61.9481	194.686	3.14273	1.65202	1.62472e-10	1.85894e-09
CDKN3	ENSG00000100526	407.092	567.192	246.993	0.435467	-1.19937	3.08676e-12	4.03395e-11
ATP6V1D	ENSG00000100554	802.52	508.796	1096.24	2.15459	1.10741	3.06194e-13	4.31742e-12
TIMM9	ENSG00000100575	309.274	419.345	199.204	0.475037	-1.07389	1.69346e-08	1.58298e-07
SAMD15	ENSG00000100583	17.1406	6.02942	28.2518	4.68566	2.22825	0.00283583	0.0118429
DAAM1	ENSG00000100592	228.195	123.894	332.496	2.68372	1.42424	2.30776e-12	3.03829e-11
SPTLC2	ENSG00000100596	840.775	509.291	1172.26	2.30175	1.20273	9.71059e-16	1.64339e-14
ITPK1	ENSG00000100605	1735.13	1091.36	2378.91	2.17977	1.12418	5.12507e-16	8.8583e-15
CEP128	ENSG00000100629	194.254	273.061	115.447	0.422787	-1.242	0.00195703	0.00845002
HIF1A	ENSG00000100644	1032.64	664.813	1400.47	2.10657	1.0749	9.79702e-12	1.2305e-10
KIAA0247	ENSG00000100647	1739.92	841.335	2638.51	3.1361	1.64897	1.67262e-32	6.39286e-31
PCK2	ENSG00000100889	3151.54	4446.54	1856.54	0.417525	-1.26006	3.01077e-11	3.66323e-10
PLTP	ENSG00000100979	1166.43	1596.85	735.998	0.460905	-1.11746	4.58318e-08	4.0903e-07
MMP9	ENSG00000100985	2274.58	9.82907	4539.34	461.828	8.85121	0	0
PYGB	ENSG00000100994	5318.78	2845.47	7792.1	2.73842	1.45334	2.13488e-29	7.35757e-28
PROCR	ENSG00000101000	133.791	54.1008	213.482	3.94601	1.98039	2.3716e-14	3.61506e-13
GINS1	ENSG00000101003	509.214	729.499	288.93	0.396066	-1.33619	4.58806e-10	5.04225e-09
NINL	ENSG00000101004	300.458	414.056	186.86	0.451292	-1.14787	2.57886e-09	2.61085e-08
CD40	ENSG00000101017	497.215	286.117	708.314	2.4756	1.30778	5.82174e-15	9.32463e-14
SGK2	ENSG00000101049	16.7622	26.1831	7.34127	0.280382	-1.83453	0.00519958	0.020437
MYBL2	ENSG00000101057	5266.95	7652.89	2881	0.376459	-1.40943	1.85729e-08	1.72702e-07
SLA2	ENSG00000101082	55.0919	86.5624	23.6214	0.272884	-1.87364	3.32248e-06	2.33718e-05
C20orf24	ENSG00000101084	685.764	435.202	936.326	2.15147	1.10533	3.10776e-07	2.49094e-06
RIMS4	ENSG00000101098	143.367	223.179	63.5556	0.284774	-1.81211	2.20932e-07	1.8086e-06
SALL4	ENSG00000101115	42.993	83.3401	2.64591	0.0317484	-4.97717	1.22357e-18	2.49978e-17
TPD52L2	ENSG00000101150	4887.91	2983.74	6792.08	2.27637	1.18673	3.40647e-20	7.65929e-19
CTSZ	ENSG00000101160	2791.34	1095.65	4487.03	4.09532	2.03398	1.36307e-51	9.70134e-50
SLCO4A1	ENSG00000101187	812.454	416.537	1208.37	2.901	1.53655	5.77175e-24	1.573e-22
NTSR1	ENSG00000101188	2975.01	441.814	5508.21	12.4673	3.64007	1.1934e-137	4.77326e-135
TCFL5	ENSG00000101190	459.742	614.774	304.711	0.495647	-1.01261	0.000569052	0.00274455
ISM1	ENSG00000101230	35.4361	9.33353	61.5386	6.59329	2.721	3.49108e-08	3.1533e-07
TRIB3	ENSG00000101255	9708.42	14601.3	4815.53	0.329802	-1.60033	7.97891e-13	1.08674e-11
RASSF2	ENSG00000101265	1000.12	1345.34	654.904	0.486794	-1.03862	6.14849e-13	8.44317e-12
HM13	ENSG00000101294	5246.55	3121.11	7371.99	2.36198	1.24	7.3279e-22	1.80327e-20
FERMT1	ENSG00000101311	23.8762	39.8944	7.85811	0.196973	-2.34393	0.00012352	0.000670564
CCM2L	ENSG00000101331	5.78183	11.5637	0	0	#NAME?	0.000800801	0.00375577
MYL9	ENSG00000101335	3108.32	625.425	5591.21	8.93986	3.16025	9.79951e-112	2.4847e-109
PAK7	ENSG00000101349	18.468	0.826027	36.1099	43.7152	5.45006	2.00965e-09	2.06253e-08
MROH8	ENSG00000101353	96.7081	159.742	33.6736	0.2108	-2.24606	1.05227e-13	1.53321e-12
CHMP4B	ENSG00000101421	2469.74	1603.21	3336.27	2.08099	1.05727	8.81627e-16	1.49739e-14
CST3	ENSG00000101439	9207.44	5879.12	12535.8	2.13225	1.09238	1.02358e-17	1.97873e-16
PPP1R16B	ENSG00000101445	300.141	162.055	438.227	2.70418	1.43519	8.04202e-14	1.1772e-12
FAM83D	ENSG00000101447	318.177	442.556	193.797	0.437904	-1.19131	6.5116e-09	6.38523e-08
PIGU	ENSG00000101464	699.026	950.615	447.437	0.470682	-1.08718	0.000146114	0.000782896
APMAP	ENSG00000101474	1971.11	1172.05	2770.17	2.36352	1.24094	1.10291e-19	2.40003e-18
MYOM1	ENSG00000101605	22.5063	8.83762	36.1749	4.09329	2.03326	0.000309327	0.00156694
MYL12A	ENSG00000101608	6654.12	2872.8	10435.4	3.63249	1.86096	3.10653e-46	1.84559e-44
ST8SIA5	ENSG00000101638	399.045	148.428	649.663	4.37696	2.12993	2.31369e-31	8.48892e-30
LIPG	ENSG00000101670	26.4603	8.92015	44.0005	4.93271	2.30238	1.27847e-05	8.24571e-05
POLI	ENSG00000101751	525.936	712.551	339.321	0.476205	-1.07034	0.00988429	0.0363593
STS	ENSG00000101846	131.041	47.2453	214.838	4.54727	2.185	1.58874e-16	2.83042e-15
GUCY2F	ENSG00000101890	146.726	288.095	5.35684	0.018594	-5.74902	4.98596e-28	1.6145e-26
XIAP	ENSG00000101966	540.012	334.103	745.92	2.23261	1.15873	1.63212e-12	2.17192e-11
ABCD1	ENSG00000101986	2009.74	1297.61	2721.88	2.09761	1.06875	1.47273e-13	2.12298e-12
SYP	ENSG00000102003	67.3246	25.7701	108.879	4.22502	2.07896	1.85434e-09	1.90933e-08
PLP2	ENSG00000102007	5178.76	1602.8	8754.72	5.46214	2.44947	6.52931e-68	7.15904e-66
RENBP	ENSG00000102032	770.783	499.466	1042.1	2.08643	1.06104	2.94137e-12	3.84926e-11
ZC3H12B	ENSG00000102053	38.3823	57.3217	19.4429	0.33919	-1.55984	0.00058171	0.00279705
SCML2	ENSG00000102098	105.192	172.71	37.675	0.21814	-2.19667	3.8156e-14	5.70592e-13
PHEX	ENSG00000102174	6.37092	0.495544	12.2463	24.7128	4.62719	0.00150471	0.0066621
CD99L2	ENSG00000102181	2273.06	1377.81	3168.32	2.29954	1.20135	5.67101e-19	1.17551e-17
JADE3	ENSG00000102221	154.196	226.233	82.1599	0.363165	-1.4613	1.55885e-09	1.6174e-08
TIMP1	ENSG00000102265	9991.31	1351.87	18630.8	13.7815	3.78466	4.66855e-164	2.8208e-161
KLHL4	ENSG00000102271	51.358	0	102.716	Inf	Inf	3.89472e-30	1.37224e-28
PCDH11X	ENSG00000102290	7.56649	1.32157	13.8114	10.4508	3.38553	0.00389693	0.0157845
PORCN	ENSG00000102312	91.3407	50.6327	132.049	2.60797	1.38293	4.5375e-06	3.13137e-05
SRPX2	ENSG00000102359	11.1323	1.32157	20.943	15.8471	3.98614	7.25316e-05	0.000410554
SYTL4	ENSG00000102362	53.7762	71.9415	35.611	0.494999	-1.0145	0.0113814	0.0412255
CENPI	ENSG00000102384	109.083	149.994	68.1713	0.454493	-1.13767	0.000215321	0.00112114
DRP2	ENSG00000102385	17.8942	27.0917	8.69674	0.321012	-1.6393	0.0108055	0.0393708
GLA	ENSG00000102393	2182.67	1152.14	3213.2	2.78888	1.47969	5.63111e-28	1.81512e-26
NDFIP2	ENSG00000102471	1388.29	796.809	1979.76	2.48461	1.31302	1.41393e-20	3.23552e-19
FNDC3A	ENSG00000102531	1010.3	497.392	1523.2	3.06238	1.61465	3.42009e-24	9.39301e-23
CAB39L	ENSG00000102547	153.548	85.239	221.857	2.60276	1.38004	4.37849e-09	4.35061e-08
KLF5	ENSG00000102554	251.631	44.1896	459.073	10.3887	3.37695	4.22871e-49	2.77337e-47
ACP5	ENSG00000102575	39.0873	1.4041	76.7705	54.6759	5.77283	1.30199e-19	2.82027e-18
SLC25A15	ENSG00000102743	271.555	374.661	168.448	0.4496	-1.15328	3.67345e-07	2.92045e-06
FLT1	ENSG00000102755	42.2254	3.46917	80.9815	23.3432	4.54493	3.68975e-17	6.86642e-16
RGCC	ENSG00000102760	979.995	117.454	1842.54	15.6873	3.97153	3.00958e-120	8.63293e-118
TSC22D1	ENSG00000102804	2335.82	576.773	4094.87	7.09962	2.82774	1.65192e-88	2.87799e-86
CLN5	ENSG00000102805	347.904	152.638	543.17	3.55855	1.83129	5.96611e-23	1.54163e-21
HSF4	ENSG00000102878	79.1644	108.697	49.632	0.45661	-1.13097	0.000486602	0.0023735
CORO1A	ENSG00000102879	22752.2	12693.2	32811.2	2.58494	1.37013	3.81418e-28	1.2393e-26
CENPT	ENSG00000102901	675.224	901.21	449.237	0.498481	-1.00439	5.26786e-10	5.74047e-09
CCL22	ENSG00000102962	119.289	65.4997	173.078	2.64242	1.40186	0.000135076	0.000728861
USB1	ENSG00000103005	1807.77	1158.67	2456.87	2.12042	1.08435	4.89811e-15	7.8853e-14
SLC38A7	ENSG00000103042	309.395	132.239	486.551	3.67933	1.87944	8.50137e-22	2.08302e-20
VAC14	ENSG00000103043	2200.09	1378.47	3021.71	2.19208	1.1323	4.26151e-17	7.90969e-16
SMPD3	ENSG00000103056	37.0084	61.9477	12.0691	0.194828	-2.35973	7.79736e-07	5.96042e-06
PLA2G15	ENSG00000103066	1605.11	624.353	2585.87	4.14167	2.05021	3.24772e-47	2.00062e-45
FA2H	ENSG00000103089	30.8668	0	61.7337	Inf	Inf	2.88811e-15	4.75734e-14
MPG	ENSG00000103152	3692.78	2142.16	5243.4	2.44772	1.29144	4.89425e-23	1.27278e-21
NECAB2	ENSG00000103154	125.401	206.657	44.1452	0.213616	-2.22691	2.37004e-16	4.183e-15
NAGPA	ENSG00000103174	379.079	246.387	511.77	2.07709	1.05457	4.59481e-09	4.55758e-08
NOMO3	ENSG00000103226	431.366	245.727	617.005	2.51094	1.32823	1.60693e-14	2.48956e-13
RHBDL1	ENSG00000103269	136.883	215	58.766	0.27333	-1.87128	1.99856e-08	1.85232e-07
TCEB2	ENSG00000103363	3420.54	2179.97	4661.1	2.13814	1.09636	1.46967e-17	2.81618e-16
CPPED1	ENSG00000103381	1132.17	577.932	1686.4	2.91799	1.54497	3.45441e-26	1.05143e-24
USP31	ENSG00000103404	1498.68	805.977	2191.38	2.71891	1.44303	4.32839e-25	1.24537e-23
XYLT1	ENSG00000103489	1947.67	649.707	3245.63	4.99553	2.32064	2.4522e-61	2.29071e-59
NOMO1	ENSG00000103512	4539.2	2463.88	6614.52	2.6846	1.42471	6.20401e-28	1.99526e-26
IL21R	ENSG00000103522	50.2594	10.9852	89.5336	8.15037	3.02687	5.46551e-13	7.55277e-12
CCP110	ENSG00000103540	328.737	461.544	195.929	0.424508	-1.23614	0.00173902	0.00761051
AAGAB	ENSG00000103591	953.98	620.219	1287.74	2.07627	1.05399	3.52117e-13	4.93555e-12
LACTB	ENSG00000103642	476.167	115.716	836.618	7.22991	2.85398	3.99702e-56	3.2617e-54
CORO2B	ENSG00000103647	198.65	64.1775	333.122	5.19064	2.37591	7.30346e-25	2.08236e-23
RASL12	ENSG00000103710	3.56581	0	7.13162	Inf	Inf	0.0103548	0.037909
AP3B2	ENSG00000103723	62.6239	41.2156	84.0322	2.03885	1.02775	0.00166772	0.00732785
IGDCC4	ENSG00000103742	12.4924	3.79965	21.1852	5.57556	2.47912	0.00308004	0.0127673
CTSH	ENSG00000103811	6620.75	863.388	12378.1	14.3367	3.84164	1.14184e-163	6.75543e-161
CD276	ENSG00000103855	7268.75	1281.5	13256	10.3441	3.37074	2.11447e-133	7.79829e-131
KIAA1199	ENSG00000103888	181.624	17.3451	345.903	19.9424	4.31777	2.75057e-54	2.09975e-52
HOMER2	ENSG00000103942	1005.22	224.664	1785.78	7.94866	2.99071	1.17017e-79	1.6783e-77
EHD4	ENSG00000103966	1726	545.722	2906.28	5.32557	2.41294	9.50474e-64	9.27545e-62
CEP152	ENSG00000103995	190.165	293.378	86.9528	0.296385	-1.75446	0.00595238	0.0230891
TGM5	ENSG00000104055	1481.5	802.595	2160.4	2.69177	1.42855	2.88209e-24	7.9539e-23
BMF	ENSG00000104081	848.747	532.172	1165.32	2.18975	1.13076	3.86371e-14	5.77483e-13
DMXL2	ENSG00000104093	383.482	250.43	516.534	2.06259	1.04446	6.71301e-07	5.17049e-06
SCG3	ENSG00000104112	30.1928	14.9499	45.4356	3.03918	1.60368	0.0014383	0.00639599
RHOV	ENSG00000104140	31.3027	7.68147	54.9239	7.15017	2.83798	4.45319e-08	3.98304e-07
VPS18	ENSG00000104142	1674.4	1098.46	2250.35	2.04863	1.03466	1.19868e-13	1.73941e-12
OIP5	ENSG00000104147	133.728	201.125	66.3315	0.329803	-1.60033	5.74896e-07	4.46917e-06
MYEF2	ENSG00000104177	387.367	562.478	212.257	0.37736	-1.40599	6.59822e-07	5.09036e-06
ZFAND1	ENSG00000104231	700.258	962.904	437.613	0.454472	-1.13774	5.2077e-06	3.56357e-05
CPQ	ENSG00000104324	1068.39	468.076	1668.7	3.56501	1.83391	3.34611e-35	1.41614e-33
SFRP1	ENSG00000104332	101.395	172.875	29.9144	0.173041	-2.53081	1.44267e-16	2.57829e-15
JPH1	ENSG00000104369	22.3491	34.8557	9.84254	0.28238	-1.82429	0.00240913	0.0102142
ESRP1	ENSG00000104413	77.7421	152.144	3.3399	0.0219522	-5.50949	7.58892e-32	2.83193e-30
NDRG1	ENSG00000104419	5908.82	3133.08	8684.55	2.77189	1.47087	3.18273e-30	1.12557e-28
TRPS1	ENSG00000104447	261.038	128.85	393.225	3.05181	1.60966	1.26683e-15	2.12495e-14
NCALD	ENSG00000104490	198.823	266.953	130.693	0.489573	-1.0304	1.24521e-06	9.24728e-06
SQLE	ENSG00000104549	4098.6	1418.6	6778.59	4.77836	2.25652	3.00293e-64	3.00272e-62
GSR	ENSG00000104687	1310.01	693.237	1926.79	2.77941	1.47478	1.13401e-24	3.18533e-23
ARHGEF10	ENSG00000104728	509.689	836.538	182.841	0.218569	-2.19384	1.01467e-36	4.53775e-35
ASAH1	ENSG00000104763	2507.17	1206.65	3807.7	3.1556	1.65792	2.09747e-35	8.984e-34
MAN2B1	ENSG00000104774	3573.25	2260.94	4885.56	2.16085	1.1116	2.28604e-17	4.30782e-16
KCNN4	ENSG00000104783	6298.31	772.531	11824.1	15.3056	3.93599	1.00999e-170	6.829e-168
NUCB1	ENSG00000104805	4246.78	2788.81	5704.74	2.04558	1.03251	1.15041e-15	1.93883e-14
MAP4K1	ENSG00000104814	455.678	806.478	104.878	0.130044	-2.94293	3.33224e-55	2.64326e-53
TUBB4A	ENSG00000104833	11.6468	22.6321	0.661477	0.0292274	-5.09654	0.00124267	0.00559616
RELB	ENSG00000104856	734.255	390.191	1078.32	2.76357	1.46653	9.89394e-21	2.28988e-19
FCGRT	ENSG00000104870	2158.21	1089.29	3227.13	2.96261	1.56687	2.38882e-31	8.75325e-30
PPP1R13L	ENSG00000104881	108.006	160.073	55.9396	0.349463	-1.51679	2.43985e-08	2.24344e-07
DOT1L	ENSG00000104885	5602.93	3094.33	8111.53	2.62142	1.39035	1.2047e-27	3.83963e-26
SLC17A7	ENSG00000104888	469.645	89.8661	849.425	9.45211	3.24064	1.76796e-65	1.82569e-63
RNASEH2A	ENSG00000104889	1149.47	1551.51	747.442	0.481752	-1.05364	8.93816e-07	6.76328e-06
SF3A2	ENSG00000104897	3726.71	5185.15	2268.27	0.437455	-1.19279	0.000167651	0.000892231
AMH	ENSG00000104899	62.2397	105.311	19.1682	0.182015	-2.45787	3.25932e-11	3.94873e-10
FCER2	ENSG00000104921	245.954	61.535	430.372	6.99394	2.80611	1.25155e-37	5.85529e-36
IL4I1	ENSG00000104951	1078.17	71.199	2085.13	29.286	4.87214	1.00295e-162	5.8126e-160
LILRB1	ENSG00000104972	62.6725	5.86436	119.481	20.374	4.34866	1.25196e-23	3.33833e-22
LILRA1	ENSG00000104974	28.7086	4.54279	52.8744	11.6392	3.54092	1.05587e-09	1.1089e-08
ASF1B	ENSG00000105011	1734.43	2376.98	1091.88	0.459356	-1.12232	2.49276e-16	4.39413e-15
FAM32A	ENSG00000105058	3041.29	1979.01	4103.58	2.07355	1.0521	1.52649e-16	2.72637e-15
RASAL3	ENSG00000105122	1098.39	600.397	1596.39	2.65888	1.41082	2.19529e-22	5.49751e-21
AKAP8	ENSG00000105127	1780.08	999.666	2560.5	2.56135	1.3569	8.73124e-24	2.35246e-22
ZNF419	ENSG00000105136	193.14	304.121	82.1599	0.270155	-1.88814	1.56759e-16	2.79527e-15
PLD3	ENSG00000105223	10524.9	6038.19	15011.5	2.4861	1.31388	3.07242e-25	8.95795e-24
EBI3	ENSG00000105246	67.7664	3.38664	132.146	39.0199	5.28614	2.01395e-29	6.95768e-28
TJP3	ENSG00000105289	47.7661	81.6884	13.8439	0.169472	-2.56088	2.06313e-09	2.11435e-08
TGFB1	ENSG00000105329	9091.73	1883.14	16300.3	8.65591	3.11369	1.24638e-82	1.97736e-80
MYH14	ENSG00000105357	481.543	746.843	216.243	0.289543	-1.78815	9.49051e-25	2.68438e-23
ICAM5	ENSG00000105376	48.1784	17.9236	78.4332	4.37598	2.12961	8.82952e-08	7.61205e-07
NAPA	ENSG00000105402	4211.45	2587.69	5835.21	2.25498	1.17312	2.72679e-19	5.81711e-18
RABAC1	ENSG00000105404	673.536	394.236	952.835	2.41691	1.27316	1.23906e-15	2.0833e-14
ATP1A3	ENSG00000105409	423.373	762.458	84.2889	0.110549	-3.17724	7.78232e-15	1.23052e-13
CNFN	ENSG00000105427	71.7102	110.763	32.6579	0.294846	-1.76197	2.69105e-07	2.1735e-06
CCDC114	ENSG00000105479	9.56064	16.0236	3.09773	0.193324	-2.37091	0.00844363	0.0315877
LIG1	ENSG00000105486	1784.21	2527.14	1041.29	0.412045	-1.27913	1.3107e-20	3.00898e-19
SIGLEC6	ENSG00000105492	264.942	70.2905	459.593	6.53848	2.70895	3.31133e-37	1.5167e-35
ZNF175	ENSG00000105497	298.213	195.506	400.921	2.05069	1.03611	6.41461e-08	5.62576e-07
PLA2G4C	ENSG00000105499	97.5624	34.7739	160.351	4.61125	2.20516	1.4368e-13	2.07223e-12
RASIP1	ENSG00000105538	12.2222	23.5407	0.903643	0.0383864	-4.70326	0.00177645	0.00774332
DNASE2	ENSG00000105612	1150.19	752.375	1548.01	2.05749	1.04089	5.24846e-13	7.26344e-12
MAST1	ENSG00000105613	153.075	249.693	56.4565	0.226103	-2.14495	1.13611e-05	7.37784e-05
TMEM147	ENSG00000105677	926.049	605.768	1246.33	2.05744	1.04085	4.70173e-12	6.07184e-11
HAMP	ENSG00000105697	3.79172	0	7.58344	Inf	Inf	0.00724881	0.0275387
PBX4	ENSG00000105717	24.9323	38.4895	11.3752	0.295539	-1.75858	0.00153515	0.00679053
GRIK5	ENSG00000105737	28.8742	47.906	9.84254	0.205456	-2.2831	2.49222e-05	0.000154024
ZNF85	ENSG00000105750	169.419	251.918	86.9203	0.345034	-1.53519	8.43968e-10	8.95628e-09
ETHE1	ENSG00000105755	1166.71	387.299	1946.12	5.02484	2.32908	5.70103e-55	4.4847e-53
CADM4	ENSG00000105767	172.092	50.797	293.386	5.77565	2.52998	3.65977e-20	8.20285e-19
TFPI2	ENSG00000105825	410.99	2.06507	819.915	397.04	8.63314	2.17786e-149	1.06633e-146
ITGB8	ENSG00000105855	6.36531	0	12.7306	Inf	Inf	0.000176836	0.000935677
DUS4L	ENSG00000105865	94.1151	126.869	61.3615	0.483662	-1.04793	0.000260075	0.00133821
PTN	ENSG00000105894	5.599	0	11.198	Inf	Inf	0.000425816	0.00210009
MPP6	ENSG00000105926	90.2823	131.659	48.9055	0.371456	-1.42874	2.09647e-06	1.51182e-05
DFNA5	ENSG00000105928	130.024	69.3809	190.667	2.74812	1.45844	1.27447e-08	1.20561e-07
CAV1	ENSG00000105974	59.6361	84.6623	34.6098	0.408798	-1.29054	0.000264907	0.00136086
MET	ENSG00000105976	15.5301	0	31.0602	Inf	Inf	4.69126e-10	5.15061e-09
HOXA1	ENSG00000105991	81.3395	51.5409	111.138	2.15631	1.10856	0.000338455	0.00170265
LFNG	ENSG00000106003	150.538	44.2724	256.803	5.80052	2.53618	1.21733e-20	2.80144e-19
HOXA5	ENSG00000106004	65.8466	97.7123	33.9808	0.347764	-1.52382	1.31843e-05	8.49106e-05
HOXA6	ENSG00000106006	8.13619	15.6109	0.661477	0.0423728	-4.56072	0.000318164	0.00160797
IQCE	ENSG00000106012	652.448	430.99	873.906	2.02767	1.01982	6.97184e-11	8.22544e-10
VIPR2	ENSG00000106018	10.9181	18.254	3.58206	0.196234	-2.34935	0.00866056	0.0323311
HOXA13	ENSG00000106031	535.009	784.833	285.185	0.36337	-1.46049	5.90188e-19	1.22248e-17
CPVL	ENSG00000106066	142.403	71.7764	213.03	2.96797	1.56948	2.62233e-10	2.93879e-09
STX1A	ENSG00000106089	486.008	93.4156	878.601	9.40529	3.23347	2.599e-68	2.88306e-66
NOD1	ENSG00000106100	335.079	462.047	208.111	0.45041	-1.15069	6.45319e-10	6.95475e-09
CCL24	ENSG00000106178	54.6283	16.9325	92.3242	5.45249	2.44692	5.33393e-10	5.80802e-09
HSPB1	ENSG00000106211	18653.6	12049.4	25257.7	2.09617	1.06776	5.93299e-18	1.16197e-16
SNX8	ENSG00000106266	1310.86	679.032	1942.69	2.86097	1.5165	2.85507e-26	8.70873e-25
TFR2	ENSG00000106327	104.355	156.852	51.8586	0.330622	-1.59675	2.8445e-08	2.59153e-07
PCOLCE	ENSG00000106333	51.296	75.0812	27.5107	0.366412	-1.44846	0.000201431	0.001055
FBXO24	ENSG00000106336	10.8989	18.0061	3.79172	0.21058	-2.24756	0.0098664	0.0363014
SERPINE1	ENSG00000106366	70.39	25.6876	115.092	4.48047	2.16365	1.06465e-10	1.23758e-09
AP1S1	ENSG00000106367	1466.48	950.115	1982.84	2.08695	1.0614	4.93136e-14	7.32048e-13
PLOD3	ENSG00000106397	4374.72	2907.59	5841.84	2.00917	1.0066	9.90956e-15	1.55562e-13
EZH2	ENSG00000106462	1180.86	1622.03	739.696	0.456032	-1.13279	4.25022e-15	6.87737e-14
MEST	ENSG00000106484	201.425	332.535	70.315	0.211451	-2.2416	1.3402e-23	3.56691e-22
AHR	ENSG00000106546	598.275	147.436	1049.11	7.11572	2.83101	8.39515e-60	7.42696e-58
GLI3	ENSG00000106571	13.0426	4.62532	21.4599	4.63965	2.21402	0.00312139	0.0129183
YKT6	ENSG00000106636	1821.54	1162.8	2480.27	2.13301	1.09289	1.84465e-15	3.0688e-14
CLIP2	ENSG00000106665	1484.47	439.665	2529.27	5.75272	2.52424	5.96625e-67	6.39357e-65
LIMK1	ENSG00000106683	3617.99	1329.98	5905.99	4.44066	2.15077	8.17428e-58	6.82745e-56
CNTNAP3	ENSG00000106714	89.9138	154.786	25.0419	0.161785	-2.62785	1.22916e-15	2.06786e-14
PRUNE2	ENSG00000106772	127.713	213.345	42.0811	0.197245	-2.34194	2.34766e-06	1.68356e-05
MEGF9	ENSG00000106780	131.84	176.923	86.7577	0.490371	-1.02805	3.21213e-05	0.000194744
TGFBR1	ENSG00000106799	2749.66	726.601	4772.72	6.56855	2.71558	4.76544e-85	8.00763e-83
C5	ENSG00000106804	308.381	417.688	199.074	0.47661	-1.06912	1.38451e-05	8.88928e-05
SUSD1	ENSG00000106868	1314.92	541.009	2088.84	3.861	1.94898	2.25802e-41	1.17874e-39
ENG	ENSG00000106991	3022.56	1692.5	4352.62	2.5717	1.36272	9.80304e-25	2.77002e-23
PLGRKT	ENSG00000107020	310.743	199.554	421.932	2.11438	1.08024	5.69993e-09	5.60868e-08
KANK1	ENSG00000107104	2112.83	859.001	3366.66	3.91928	1.97059	1.61749e-47	1.00731e-45
NCS1	ENSG00000107130	2023.33	1123.9	2922.76	2.60055	1.37882	7.40813e-24	2.00549e-22
TESK1	ENSG00000107140	873.183	333.197	1413.17	4.24124	2.08448	3.25856e-41	1.69171e-39
CREB3	ENSG00000107175	933.494	506.898	1360.09	2.68317	1.42394	6.00234e-22	1.47964e-20
MPDZ	ENSG00000107186	55.8695	83.4222	28.3168	0.33944	-1.55877	2.30192e-05	0.00014301
LHX3	ENSG00000107187	364.267	726.276	2.25911	0.00311054	-8.32862	2.81224e-125	9.07522e-123
DDX58	ENSG00000107201	369.074	155.529	582.62	3.74606	1.90537	2.82608e-25	8.25669e-24
GLIS3	ENSG00000107249	73.3361	11.3161	135.356	11.9614	3.58032	6.15424e-21	1.44796e-19
RAPGEF1	ENSG00000107263	8084.12	3234.76	12933.5	3.99828	1.99938	3.1611e-54	2.39384e-52
APBA1	ENSG00000107282	106.307	162.386	50.2285	0.309316	-1.69285	2.09671e-09	2.14567e-08
SH3GL2	ENSG00000107295	21.4778	34.8553	8.10028	0.232397	-2.10533	0.00336607	0.0138235
PTGDS	ENSG00000107317	391.199	155.861	626.537	4.01984	2.00714	1.20775e-27	3.84503e-26
SHB	ENSG00000107338	209.892	89.2866	330.497	3.70153	1.88812	1.82756e-13	2.61588e-12
ZFAND5	ENSG00000107372	1897.31	1171.55	2623.07	2.23897	1.16283	1.21208e-17	2.33201e-16
PHYH	ENSG00000107537	714.021	992.977	435.064	0.438141	-1.19053	1.25914e-14	1.96684e-13
CXCL12	ENSG00000107562	37.0462	13.2153	60.8771	4.60655	2.20369	1.65363e-06	1.20472e-05
DDX50	ENSG00000107625	473.338	645.16	301.516	0.46735	-1.09742	1.07561e-10	1.2498e-09
PALD1	ENSG00000107719	175.853	81.6055	270.101	3.30984	1.72676	5.00164e-14	7.42093e-13
UNC5B	ENSG00000107731	429.694	158.752	700.636	4.4134	2.14189	3.0135e-33	1.18858e-31
LIPA	ENSG00000107798	2654.4	1359.96	3948.83	2.90363	1.53786	6.37416e-18	1.24579e-16
NEURL1	ENSG00000107954	425.244	593.215	257.273	0.433693	-1.20525	9.76386e-07	7.36256e-06
DKK1	ENSG00000107984	4.88876	0	9.77752	Inf	Inf	0.00200609	0.00864475
EBF3	ENSG00000108001	510.459	907.987	112.931	0.124375	-3.00723	1.10322e-58	9.46503e-57
SORCS1	ENSG00000108018	133.96	8.09485	259.825	32.0975	5.00439	1.11885e-45	6.51091e-44
ZMIZ1	ENSG00000108175	7757.44	4267.71	11247.2	2.63541	1.39803	4.87259e-28	1.57959e-26
PPIF	ENSG00000108179	17300.9	8583.16	26018.6	3.03136	1.59996	5.34087e-37	2.42284e-35
TSPAN14	ENSG00000108219	7027.79	2915.44	11140.1	3.82109	1.93398	3.33516e-50	2.28773e-48
PSMB3	ENSG00000108294	1811.62	1181.47	2441.77	2.06673	1.04735	2.6825e-14	4.06064e-13
2019-09-04	ENSG00000108387	46.0306	21.9704	70.0907	3.19023	1.67366	2.29345e-05	0.000142546
TRIM16L	ENSG00000108448	52.9538	88.6263	17.2813	0.194991	-2.35852	1.54048e-08	1.4433e-07
HOXB6	ENSG00000108511	29.2699	40.3077	18.2321	0.452323	-1.14458	0.01178	0.0425122
PFN1	ENSG00000108518	29987.1	19360.9	40613.3	2.0977	1.06881	4.40301e-16	7.65218e-15
CPD	ENSG00000108582	1579.77	1032.62	2126.92	2.05972	1.04245	3.98573e-14	5.95093e-13
ALDH3A1	ENSG00000108602	25.0442	48.0714	2.01694	0.0419572	-4.57494	2.57689e-10	2.89129e-09
C17orf75	ENSG00000108666	69.6328	95.8941	43.3716	0.452286	-1.14469	0.00088597	0.00411184
CYTH1	ENSG00000108669	1118.23	536.383	1700.08	3.16952	1.66426	8.09712e-31	2.91435e-29
LGALS3BP	ENSG00000108679	202.316	28.3311	376.302	13.2823	3.73143	9.57885e-49	6.19636e-47
CCL2	ENSG00000108691	41.3548	4.9558	77.7538	15.6894	3.97172	1.17929e-14	1.84414e-13
CCL1	ENSG00000108702	33.3266	0	66.6533	Inf	Inf	5.71951e-20	1.27191e-18
DHX58	ENSG00000108771	575.108	374.993	775.224	2.0673	1.04775	1.4086e-10	1.61949e-09
RAB5C	ENSG00000108774	1717.33	999.427	2435.23	2.43663	1.28489	3.59225e-14	5.38042e-13
NAGLU	ENSG00000108784	623.507	384.903	862.111	2.23982	1.16338	2.64984e-13	3.75126e-12
COL1A1	ENSG00000108821	11.9385	4.04724	19.8297	4.89956	2.29265	0.00591099	0.0229505
ABCC3	ENSG00000108846	81.9406	4.04724	159.834	39.4921	5.30349	4.28927e-35	1.8099e-33
MPP2	ENSG00000108852	102.308	166.765	37.8522	0.226979	-2.13937	1.4789e-06	1.08438e-05
DUSP3	ENSG00000108861	5183.07	2018.59	8347.55	4.13534	2.04801	8.24218e-55	6.46579e-53
MAP2K6	ENSG00000108984	30.4947	54.7614	6.22797	0.113729	-3.13632	1.14225e-08	1.08705e-07
RCVRN	ENSG00000109047	16.9216	1.73458	32.1085	18.5108	4.21029	3.04932e-07	2.44776e-06
PMP22	ENSG00000109099	40.9355	13.2982	68.5727	5.15653	2.3664	1.75888e-05	0.000111294
ALDOC	ENSG00000109107	49.8381	69.7942	29.8819	0.428143	-1.22383	0.00124753	0.00561628
GABRA4	ENSG00000109158	18.0549	0	36.1099	Inf	Inf	2.63183e-11	3.21456e-10
DCUN1D4	ENSG00000109184	300.159	423.719	176.599	0.416782	-1.26264	7.34822e-11	8.65512e-10
CHIC2	ENSG00000109220	417.643	266.542	568.743	2.13378	1.09341	5.23143e-10	5.70296e-09
KIAA1211	ENSG00000109265	32.1661	11.1506	53.1816	4.76937	2.2538	3.73795e-06	2.61132e-05
LAMTOR3	ENSG00000109270	427.217	261.665	592.769	2.26537	1.17975	5.12722e-12	6.60031e-11
NFKB1	ENSG00000109320	1023.41	643.842	1402.97	2.17906	1.12371	1.38058e-14	2.14825e-13
AREG	ENSG00000109321	8.94451	0.495544	17.3935	35.0997	5.13339	5.00517e-05	0.000292945
INPP4B	ENSG00000109452	471.729	287.021	656.437	2.28707	1.1935	8.72446e-13	1.18544e-11
GAB1	ENSG00000109458	113.399	165.194	61.6036	0.372917	-1.42307	1.51679e-07	1.26912e-06
KLHL2	ENSG00000109466	525.999	266.787	785.211	2.94321	1.55739	6.6682e-21	1.5637e-19
CPE	ENSG00000109472	258.746	130.09	387.402	2.97795	1.57432	5.93895e-15	9.50165e-14
AADAT	ENSG00000109576	44.6067	66.7377	22.4756	0.336776	-1.57014	8.39228e-05	0.000470717
TRIM2	ENSG00000109654	177.426	17.1797	337.673	19.6553	4.29685	4.91106e-53	3.62245e-51
NEIL3	ENSG00000109674	419.264	737.588	100.941	0.136853	-2.8693	3.57575e-50	2.44096e-48
WHSC1	ENSG00000109685	3581.49	4957.22	2205.76	0.44496	-1.16825	3.2135e-19	6.80514e-18
NKX3-2	ENSG00000109705	405.664	569.012	242.316	0.425853	-1.23157	7.0662e-10	7.56944e-09
UFSP2	ENSG00000109775	202.124	287.85	116.397	0.404368	-1.30626	1.04151e-09	1.09463e-08
KLHL5	ENSG00000109790	338.254	213.596	462.911	2.16723	1.11585	2.62069e-09	2.65037e-08
NCAPG	ENSG00000109805	612.376	873.702	351.05	0.401796	-1.31546	2.06753e-12	2.73214e-11
CTSC	ENSG00000109861	4264.85	2239.45	6290.24	2.80883	1.48997	3.28298e-30	1.15958e-28
CCDC34	ENSG00000109881	316.59	509.697	123.482	0.242265	-2.04534	1.69926e-05	0.000107737
SIAE	ENSG00000110013	781.847	467.415	1096.28	2.34541	1.22984	5.23706e-16	9.04636e-15
LPXN	ENSG00000110031	835.663	156.934	1514.39	9.64987	3.27051	1.15346e-49	7.74376e-48
DTX4	ENSG00000110042	269.854	80.1196	459.589	5.7363	2.52012	5.35944e-33	2.08205e-31
UNC93B1	ENSG00000110057	3819.18	2331.31	5307.05	2.27643	1.18677	9.77377e-20	2.13669e-18
MS4A6A	ENSG00000110077	3320.81	5511.67	1129.95	0.20501	-2.28623	3.95555e-64	3.90034e-62
MS4A4A	ENSG00000110079	326.286	477.329	175.243	0.367132	-1.44563	1.92644e-13	2.75325e-12
CCND1	ENSG00000110092	2391.75	278.102	4505.4	16.2005	4.01797	3.50245e-156	1.98925e-153
PANX1	ENSG00000110218	428.083	159.99	696.176	4.35138	2.12147	4.01985e-32	1.51601e-30
ARHGEF17	ENSG00000110237	947.414	1497.32	397.505	0.265477	-1.91334	1.26191e-15	2.11795e-14
RNF141	ENSG00000110315	399.168	247.954	550.381	2.21969	1.15036	4.73266e-11	5.64697e-10
IL10RA	ENSG00000110324	1264.48	202.942	2326.01	11.4615	3.51872	7.60287e-110	1.87745e-107
GALNT18	ENSG00000110328	18.0934	5.36881	30.8181	5.7402	2.5211	0.000148824	0.000796363
SLC15A3	ENSG00000110446	545.963	183.779	908.147	4.9415	2.30495	1.94178e-41	1.01739e-39
ACCS	ENSG00000110455	1042.43	1603.69	481.165	0.300035	-1.7368	4.47557e-31	1.62321e-29
SLC22A18	ENSG00000110628	1004.72	651.279	1358.16	2.08538	1.06031	5.59212e-13	7.71272e-12
CD81	ENSG00000110651	13260.5	4590.93	21930.1	4.77682	2.25605	1.00545e-67	1.09818e-65
PITPNM1	ENSG00000110697	1585.41	916.915	2253.91	2.45815	1.29757	2.68526e-20	6.06168e-19
NDUFS8	ENSG00000110717	2536.41	1638.32	3434.5	2.09636	1.06788	1.46826e-15	2.45412e-14
TCIRG1	ENSG00000110719	5137.7	2961.18	7314.23	2.47004	1.30453	1.70335e-24	4.75164e-23
EXPH5	ENSG00000110723	8.87774	14.8674	2.88808	0.194256	-2.36397	0.0134452	0.0477599
VWF	ENSG00000110799	68.0395	6.11231	129.967	21.2631	4.41028	7.08349e-25	2.02168e-23
LEPREL2	ENSG00000110811	81.0778	135.129	27.0264	0.200004	-2.3219	2.0721e-12	2.73691e-11
PPFIBP1	ENSG00000110841	1402.82	377.881	2427.75	6.42465	2.68362	6.73836e-73	8.35615e-71
SELPLG	ENSG00000110876	628.692	988.187	269.197	0.272415	-1.87612	2.50658e-30	8.93121e-29
CORO1C	ENSG00000110880	4358.03	2338.07	6377.98	2.72788	1.44778	1.01532e-28	3.38164e-27
ASIC1	ENSG00000110881	129.873	188.156	71.5908	0.380486	-1.39408	3.60536e-08	3.25342e-07
CAPRIN2	ENSG00000110888	323.062	135.787	510.338	3.75838	1.91011	1.14554e-19	2.48899e-18
KCTD10	ENSG00000110906	1158.05	667.382	1648.73	2.47044	1.30477	7.22444e-20	1.59533e-18
SLC11A2	ENSG00000110911	329.194	198.315	460.074	2.31992	1.21407	5.62538e-11	6.6757e-10
CSRNP2	ENSG00000110925	532.569	352.277	712.861	2.02358	1.01691	7.60262e-10	8.10737e-09
BIN2	ENSG00000110934	4004.74	1736.26	6273.23	3.61307	1.85322	3.92177e-46	2.32022e-44
LIN7A	ENSG00000111052	102.493	160.566	44.4198	0.276645	-1.85389	6.09896e-06	4.12672e-05
ACSS3	ENSG00000111058	21.6527	33.9471	9.35821	0.27567	-1.85898	0.0015521	0.00685909
ELK3	ENSG00000111145	328.881	186.751	471.012	2.52214	1.33465	9.57074e-13	1.29733e-11
SLC6A12	ENSG00000111181	27.3136	6.69039	47.9369	7.16504	2.84097	4.80918e-07	3.76436e-06
WNT5B	ENSG00000111186	469.016	23.8704	914.162	38.2968	5.25915	3.8582e-121	1.15332e-118
FOXM1	ENSG00000111206	1162.22	1735.62	588.83	0.339263	-1.55953	2.23789e-12	2.9504e-11
RAD51AP1	ENSG00000111247	206.518	309.901	103.135	0.332801	-1.58727	7.09934e-13	9.72068e-12
CUX2	ENSG00000111249	109.877	39.9772	179.776	4.49695	2.16895	3.65486e-14	5.47085e-13
SH2B3	ENSG00000111252	3013.71	1548.62	4478.8	2.89213	1.53213	6.33329e-31	2.2882e-29
MANSC1	ENSG00000111261	42.2729	60.957	23.5889	0.386977	-1.36968	0.000532451	0.00257897
DUSP16	ENSG00000111266	47.5693	66.1604	28.9783	0.438001	-1.19099	0.00176526	0.00770043
ALDH2	ENSG00000111275	1209.47	2015.61	403.328	0.200102	-2.32119	2.81147e-54	2.14049e-52
GSG1	ENSG00000111305	25.81	2.23013	49.3899	22.1466	4.46902	2.44526e-11	2.99313e-10
LTBR	ENSG00000111321	1680.8	999.431	2362.17	2.36351	1.24093	4.79915e-19	1.0021e-17
OAS3	ENSG00000111331	4593.26	860.831	8325.7	9.6717	3.27377	8.79145e-123	2.71369e-120
OAS2	ENSG00000111335	3263.71	693.157	5834.26	8.41694	3.0733	6.28059e-92	1.18904e-89
MGP	ENSG00000111341	28.8866	0.413013	57.3601	138.882	7.11772	2.60254e-16	4.57912e-15
RERGL	ENSG00000111404	4.24354	0	8.48708	Inf	Inf	0.00355869	0.0145222
RFC5	ENSG00000111445	720.909	1011.65	430.174	0.425222	-1.23371	6.90538e-16	1.1856e-14
GPR133	ENSG00000111452	85.139	3.63423	166.644	45.854	5.51897	1.16618e-37	5.4739e-36
TIMELESS	ENSG00000111602	1931.74	2793.43	1070.05	0.383058	-1.38436	3.43048e-19	7.25923e-18
UHRF1BP1L	ENSG00000111647	658.761	367.471	950.051	2.58538	1.37038	8.82366e-19	1.81839e-17
CDCA3	ENSG00000111665	305.655	442.471	168.838	0.381579	-1.38995	6.08089e-13	8.36247e-12
CHPT1	ENSG00000111666	288.374	425.871	150.877	0.354279	-1.49704	8.20053e-15	1.29449e-13
GOLT1B	ENSG00000111711	442.134	285.455	598.814	2.09775	1.06885	9.87483e-06	6.48083e-05
RP11-22B23.1	ENSG00000111788	91.2176	149.665	32.77	0.218956	-2.19129	1.18008e-12	1.58824e-11
SMIM8	ENSG00000111850	60.2714	83.175	37.3678	0.449268	-1.15435	0.000469002	0.00229594
NEDD9	ENSG00000111859	452.587	198.233	706.94	3.5662	1.83439	1.15197e-25	3.4148e-24
ADTRP	ENSG00000111863	9.64699	1.23904	18.0549	14.5717	3.8651	0.000358496	0.00179583
FAM184A	ENSG00000111879	65.5894	99.28	31.8989	0.321302	-1.638	3.69506e-05	0.000221563
MAN1A1	ENSG00000111885	451.929	153.629	750.229	4.88337	2.28788	1.34171e-37	6.26677e-36
GABRR2	ENSG00000111886	49.2724	12.1414	86.4034	7.11645	2.83116	7.47628e-12	9.49939e-11
SERINC1	ENSG00000111897	2311.79	1465.59	3157.99	2.15476	1.10753	5.83044e-17	1.07306e-15
NCOA7	ENSG00000111912	1855.43	1077.05	2633.8	2.44537	1.29005	1.53327e-21	3.70254e-20
FAM65B	ENSG00000111913	23.6504	3.88218	43.4187	11.1841	3.48338	1.0178e-07	8.70327e-07
SASH1	ENSG00000111961	528.033	294.788	761.279	2.58246	1.36875	2.78498e-16	4.88799e-15
UST	ENSG00000111962	638.817	415.959	861.674	2.07153	1.0507	3.99212e-11	4.80782e-10
ULBP1	ENSG00000111981	256.199	375.896	136.502	0.363137	-1.46141	4.74884e-13	6.58806e-12
PPARD	ENSG00000112033	5284.66	1416.29	9153.03	6.46268	2.69213	1.13492e-89	2.027e-87
SLC26A8	ENSG00000112053	51.4738	23.8708	79.0767	3.3127	1.72801	2.70604e-05	0.000166226
SOD2	ENSG00000112096	1194.37	724.458	1664.28	2.29727	1.19992	8.39215e-17	1.52476e-15
MCM3	ENSG00000112118	4309.1	5883.95	2734.24	0.464694	-1.10565	1.36928e-17	2.63091e-16
MDGA1	ENSG00000112139	894.94	281.573	1508.31	5.35672	2.42135	9.01901e-55	7.0557e-53
CD83	ENSG00000112149	489.246	131.659	846.832	6.43199	2.68527	5.67554e-51	4.00931e-49
RBM24	ENSG00000112183	75.8639	10.9027	140.825	12.9165	3.69115	1.62416e-18	3.2992e-17
CAP2	ENSG00000112186	389.103	190.633	587.572	3.08221	1.62396	2.30383e-19	4.93024e-18
TREML2	ENSG00000112195	39.0549	20.8147	57.2951	2.75263	1.46081	0.000999689	0.00458482
GPR63	ENSG00000112218	97.9015	163.21	32.5929	0.199699	-2.3241	3.57011e-14	5.35008e-13
PRDM13	ENSG00000112238	17.1337	27.5876	6.67979	0.242131	-2.04614	0.00190919	0.00826482
SIM1	ENSG00000112246	83.722	141.321	26.1227	0.184846	-2.4356	6.43621e-08	5.642e-07
AIM1	ENSG00000112297	51.7035	31.0571	72.3498	2.32957	1.22007	0.00134139	0.00600074
TRIM38	ENSG00000112343	324.844	191.046	458.642	2.40069	1.26345	3.67306e-12	4.77162e-11
PERP	ENSG00000112378	947.011	612.87	1281.15	2.09041	1.06379	7.00277e-13	9.59772e-12
HECA	ENSG00000112406	882.527	387.79	1377.26	3.55158	1.82846	3.4881e-33	1.36816e-31
PDE10A	ENSG00000112541	8.09229	14.6195	1.56512	0.107057	-3.22354	0.00475167	0.0188777
CCND3	ENSG00000112576	10562.1	4166.05	16958.2	4.07058	2.02523	1.71233e-55	1.37364e-53
PTK7	ENSG00000112655	53.0078	92.5911	13.4246	0.144988	-2.78599	3.38903e-11	4.10063e-10
SRF	ENSG00000112658	5452.99	3500.8	7405.18	2.11528	1.08085	2.47989e-17	4.66384e-16
GMDS	ENSG00000112699	198.469	280.83	116.108	0.413446	-1.27423	5.81229e-09	5.71133e-08
SENP6	ENSG00000112701	1249.77	2005.25	494.285	0.246495	-2.02037	7.30304e-05	0.000413296
TTK	ENSG00000112742	533.484	745.508	321.461	0.431197	-1.21358	0.00292799	0.0121955
FAM46A	ENSG00000112773	966.221	605.431	1327.01	2.19184	1.13214	6.32829e-15	1.01018e-13
PRSS16	ENSG00000112812	61.0964	99.2003	22.9925	0.231778	-2.10918	0.0005462	0.00264196
CEP72	ENSG00000112877	541.956	780.539	303.373	0.388671	-1.36338	4.17943e-16	7.27698e-15
MAN2A1	ENSG00000112893	630.916	415.129	846.702	2.03961	1.0283	4.19956e-11	5.03727e-10
HMGCS1	ENSG00000112972	1354.76	887.331	1822.19	2.05356	1.03813	9.36104e-14	1.36606e-12
MRPS27	ENSG00000113048	2050.22	2911.81	1188.63	0.408209	-1.29262	1.30578e-06	9.66171e-06
HBEGF	ENSG00000113070	807.26	276.699	1337.82	4.83493	2.2735	2.11574e-47	1.31185e-45
HMGCR	ENSG00000113161	1827.52	995.37	2659.68	2.67205	1.41795	3.22224e-25	9.37554e-24
PDE8B	ENSG00000113231	44.8033	63.5165	26.0902	0.410763	-1.28362	0.0014407	0.00640565
RNF130	ENSG00000113269	2594.28	893.869	4294.7	4.80462	2.26442	1.84304e-60	1.68835e-58
THG1L	ENSG00000113272	300	439.085	160.915	0.366478	-1.4482	5.85741e-14	8.63649e-13
ARSB	ENSG00000113273	1151.77	636.411	1667.13	2.61958	1.38934	1.67141e-21	4.02926e-20
THBS4	ENSG00000113296	232.635	363.508	101.762	0.279944	-1.83679	1.04244e-18	2.13743e-17
NPR3	ENSG00000113389	83.144	4.12977	162.158	39.2656	5.29519	7.73246e-36	3.36789e-34
ST8SIA4	ENSG00000113532	437.926	128.189	747.663	5.8325	2.54411	3.37071e-44	1.88428e-42
GNPDA1	ENSG00000113552	728.169	335.425	1120.91	3.34177	1.74061	2.08609e-28	6.88847e-27
PCDH12	ENSG00000113555	185.83	247.791	123.869	0.499893	-1.00031	5.89029e-06	3.99409e-05
H2AFY	ENSG00000113648	11685.6	6481.54	16889.7	2.60581	1.38173	4.7637e-28	1.54605e-26
HMGXB3	ENSG00000113716	2776.29	1632.12	3920.46	2.40207	1.26428	1.05608e-21	2.57208e-20
ATP6V0E1	ENSG00000113732	3346.67	1545.06	5148.28	3.33209	1.73643	8.78895e-20	1.93031e-18
STC2	ENSG00000113739	974.384	1350.12	598.646	0.443402	-1.17331	5.96591e-15	9.53941e-14
CPEB4	ENSG00000113742	310.043	185.344	434.743	2.3456	1.22996	3.11576e-10	3.47394e-09
DBN1	ENSG00000113758	4141.92	2603.79	5680.05	2.18145	1.12529	2.98706e-18	5.9444e-17
BCL6	ENSG00000113916	574.974	66.6555	1083.29	16.2521	4.02255	1.16466e-99	2.5056e-97
CD86	ENSG00000114013	50.8326	13.1328	88.5325	6.74132	2.75303	2.89301e-11	3.526e-10
KPNA1	ENSG00000114030	802.755	522.673	1082.84	2.07173	1.05084	3.93489e-12	5.09079e-11
CEP70	ENSG00000114107	836.382	1128.84	543.925	0.481845	-1.05336	1.18583e-05	7.67962e-05
TFDP2	ENSG00000114126	289.902	397.786	182.017	0.457575	-1.12792	1.34451e-09	1.40013e-08
SERPINI2	ENSG00000114204	36.3228	59.2209	13.4246	0.226687	-2.14123	0.000176362	0.000933346
PFKFB4	ENSG00000114268	794.718	493.269	1096.17	2.22225	1.15202	2.40805e-14	3.66866e-13
HES1	ENSG00000114315	412.704	3.46917	821.938	236.927	7.8883	6.06534e-147	2.82367e-144
USP4	ENSG00000114316	2871.68	1912.78	3830.57	2.00262	1.00189	2.07772e-14	3.18591e-13
CBLB	ENSG00000114423	214.97	128.521	301.418	2.34528	1.22976	7.75433e-09	7.53104e-08
ABTB1	ENSG00000114626	633.524	363.095	903.954	2.48958	1.3159	3.60106e-17	6.71457e-16
KLHL18	ENSG00000114648	526.285	301.807	750.764	2.48756	1.31473	9.5948e-16	1.62573e-14
HEMK1	ENSG00000114735	429.482	591.057	267.907	0.453268	-1.14156	3.68775e-06	2.57943e-05
MAPKAPK3	ENSG00000114738	5106.96	3081.95	7131.96	2.31411	1.21045	7.90833e-21	1.84234e-19
PEX5L	ENSG00000114757	92.1433	141.157	43.1294	0.305541	-1.71056	2.23321e-08	2.06106e-07
KLHL24	ENSG00000114796	276.685	158.254	395.116	2.49672	1.32004	5.54415e-12	7.11767e-11
VIPR1	ENSG00000114812	86.0711	38.0765	134.066	3.52095	1.81597	2.38371e-09	2.42452e-08
TTL	ENSG00000114999	1081.99	627.9	1536.07	2.44637	1.29064	3.80924e-19	8.01294e-18
CCL20	ENSG00000115009	50.7484	5.20375	96.2931	18.5045	4.20981	1.97927e-18	3.97506e-17
ACTR3	ENSG00000115091	9124.21	5649.1	12599.3	2.23032	1.15725	2.65986e-20	6.01392e-19
STEAP3	ENSG00000115107	615.446	354.919	875.973	2.46809	1.3034	2.46554e-16	4.34884e-15
EPB41L5	ENSG00000115109	58.7921	90.5253	27.0589	0.29891	-1.74222	3.86965e-06	2.69802e-05
OTOF	ENSG00000115155	16.7023	5.78183	27.6228	4.77752	2.25626	0.00131606	0.00589673
CENPA	ENSG00000115163	578.946	836.788	321.103	0.383733	-1.38183	1.71406e-17	3.26028e-16
CYTIP	ENSG00000115165	430.87	15.2804	846.46	55.3951	5.79169	9.75072e-126	3.25766e-123
ACVR1	ENSG00000115170	192.562	90.1137	295.01	3.27375	1.71094	1.02879e-07	8.79455e-07
ITGA4	ENSG00000115232	2472.9	1199.79	3746.02	3.12223	1.64258	1.85189e-35	7.95614e-34
PCSK4	ENSG00000115257	243.719	407.616	79.8211	0.195824	-2.35237	9.1937e-27	2.86589e-25
IFIH1	ENSG00000115267	421.483	175.681	667.284	3.79827	1.92534	2.70105e-28	8.85733e-27
CLIP4	ENSG00000115295	77.9901	38.2419	117.738	3.07877	1.62236	1.42371e-07	1.19759e-06
SPTBN1	ENSG00000115306	1558.51	958.699	2158.31	2.25129	1.17075	6.37371e-18	1.24579e-16
RTN4	ENSG00000115310	5998.77	3837.12	8160.42	2.1267	1.08862	1.59058e-17	3.03762e-16
LOXL3	ENSG00000115318	1362.7	236.557	2488.83	10.5211	3.39521	5.04729e-107	1.18457e-104
DOK1	ENSG00000115325	2108.01	1023.87	3192.15	3.11772	1.64049	9.17749e-34	3.68111e-32
ACADL	ENSG00000115361	3.6755	7.35099	0	0	#NAME?	0.0134114	0.0476549
LANCL1	ENSG00000115365	635.418	889.73	381.106	0.428339	-1.22318	3.59339e-15	5.87141e-14
FN1	ENSG00000115414	146.032	14.8678	277.197	18.6442	4.22065	3.58799e-22	8.91442e-21
STAT1	ENSG00000115415	4352.21	1977.61	6726.81	3.40149	1.76617	3.21188e-42	1.71772e-40
GLS	ENSG00000115419	911.581	527.956	1295.21	2.45325	1.29469	2.05137e-18	4.11403e-17
EFHD1	ENSG00000115468	49.7774	90.1966	9.35821	0.103754	-3.26877	1.47402e-11	1.83112e-10
EHBP1	ENSG00000115504	299.292	424.212	174.372	0.411049	-1.28262	6.6362e-05	0.000378798
OTX1	ENSG00000115507	1835.84	2742.96	928.714	0.338581	-1.56243	2.96291e-30	1.05308e-28
COQ10B	ENSG00000115520	351.778	193.029	510.527	2.64482	1.40317	2.84152e-14	4.29678e-13
GNLY	ENSG00000115523	64.9802	8.67256	121.288	13.9852	3.80583	2.77701e-21	6.64377e-20
ST3GAL5	ENSG00000115525	392.607	138.185	647.028	4.68233	2.22723	4.65239e-33	1.81233e-31
IL1R1	ENSG00000115594	181.355	23.3749	339.335	14.5171	3.85968	3.55963e-47	2.18802e-45
FHL2	ENSG00000115641	513.828	255.885	771.772	3.01609	1.59268	1.35699e-21	3.29084e-20
MLPH	ENSG00000115648	170.934	16.6016	325.267	19.5925	4.29223	5.09998e-52	3.66656e-50
UXS1	ENSG00000115652	2173.7	1322.04	3025.37	2.28841	1.19434	3.58985e-19	7.58516e-18
ID2	ENSG00000115738	2030.77	814.567	3246.97	3.98613	1.99499	4.19122e-47	2.57068e-45
HPCAL1	ENSG00000115756	7786.59	2780.64	12792.5	4.60058	2.20182	3.82693e-64	3.78666e-62
PLEKHB2	ENSG00000115762	4359.28	2706.31	6012.25	2.22157	1.15158	4.81316e-10	5.27127e-09
QPCT	ENSG00000115828	50.0184	9.00304	91.0338	10.1114	3.33792	2.34676e-14	3.57913e-13
DARS	ENSG00000115866	1354.73	1809.44	900.025	0.497405	-1.00751	4.15862e-13	5.80613e-12
SDC1	ENSG00000115884	62.7145	104.486	20.943	0.200439	-2.31877	3.49456e-09	3.49678e-08
PLCL1	ENSG00000115896	21.6706	3.5517	39.7895	11.2029	3.48581	1.1344e-07	9.65958e-07
SLC1A4	ENSG00000115902	5922.53	3528.32	8316.73	2.35714	1.23704	5.30672e-19	1.10484e-17
RND3	ENSG00000115963	125.786	6.11231	245.461	40.1584	5.32763	4.75488e-49	3.11127e-47
TRAK2	ENSG00000115993	692.922	333.113	1052.73	3.16028	1.66005	5.6676e-26	1.71404e-24
EPAS1	ENSG00000116016	335.959	512.102	159.816	0.312079	-1.68002	1.18112e-19	2.56433e-18
SPR	ENSG00000116096	467.012	306.436	627.589	2.04803	1.03423	1.00511e-09	1.05794e-08
EPHA4	ENSG00000116106	13.9505	2.23013	25.6709	11.5109	3.52493	2.43785e-05	0.000150795
PARD3B	ENSG00000116117	34.7967	47.3275	22.266	0.470466	-1.08784	0.0133455	0.0474444
BCL9	ENSG00000116128	70.6534	96.887	44.4198	0.458471	-1.1251	0.000492122	0.00239795
DHCR24	ENSG00000116133	8030.88	4553.19	11508.6	2.52759	1.33776	1.08132e-23	2.90514e-22
PAPPA2	ENSG00000116183	70.1721	35.4341	104.91	2.96071	1.56594	2.08508e-06	1.50437e-05
RALGPS2	ENSG00000116191	29.9577	53.6874	6.22797	0.116004	-3.10775	2.02217e-08	1.87298e-07
CHD5	ENSG00000116254	380.29	734.038	26.542	0.0361589	-4.7895	3.4317e-93	6.58468e-91
QSOX1	ENSG00000116260	17065.8	11023.1	23108.4	2.09636	1.06789	1.45695e-17	2.79369e-16
EDEM3	ENSG00000116406	1399.79	709.662	2089.92	2.94495	1.55824	6.22917e-29	2.11093e-27
RAP1A	ENSG00000116473	3094.36	1488.8	4699.92	3.15685	1.65849	3.56896e-36	1.58114e-34
S100PBP	ENSG00000116497	416.674	574.622	258.726	0.450254	-1.15119	6.88256e-11	8.12686e-10
FBXO6	ENSG00000116663	508.385	247.626	769.144	3.10607	1.63509	1.38818e-22	3.51352e-21
SWT1	ENSG00000116668	42.8888	10.5722	75.2054	7.1135	2.83056	2.06796e-10	2.34435e-09
LEPR	ENSG00000116678	139.134	66.737	211.53	3.16961	1.6643	1.58467e-11	1.96513e-10
NCF2	ENSG00000116701	1453.32	623.858	2282.79	3.65915	1.87151	2.44179e-39	1.21016e-37
GADD45A	ENSG00000116717	757.771	426.611	1088.93	2.55251	1.35192	1.99441e-12	2.63797e-11
RGS2	ENSG00000116741	587.117	153.878	1020.36	6.63093	2.72921	5.51854e-29	1.87908e-27
OLFML3	ENSG00000116774	117.292	74.0894	160.496	2.16624	1.11519	1.98354e-05	0.000124373
PHTF1	ENSG00000116793	870.019	523.082	1216.96	2.32651	1.21817	9.52738e-17	1.7233e-15
CD58	ENSG00000116815	349.891	168.33	531.452	3.15719	1.65864	7.014e-13	9.60847e-12
TTF2	ENSG00000116830	1172.99	1626.07	719.898	0.442722	-1.17553	3.78894e-15	6.16962e-14
NR5A2	ENSG00000116833	7.13162	0	14.2632	Inf	Inf	7.38754e-05	0.000417828
MAP7D1	ENSG00000116871	2803.71	1816.64	3790.78	2.0867	1.06122	7.8272e-16	1.33339e-14
RP11-268J15.5	ENSG00000116883	27.4727	39.8111	15.1344	0.380154	-1.39534	0.00554146	0.0216609
TSNAX	ENSG00000116918	643.086	398.444	887.729	2.22799	1.15574	3.12494e-13	4.40407e-12
NT5C1A	ENSG00000116981	19.4315	4.62532	34.2376	7.40221	2.88796	0.00256053	0.01079
HPCAL4	ENSG00000116983	19.0931	2.56061	35.6256	13.9129	3.79835	4.41499e-07	3.47112e-06
BMP8B	ENSG00000116985	8958.92	2346.09	15571.8	6.63732	2.7306	1.04036e-94	2.05167e-92
MYCL	ENSG00000116990	614.689	271.992	957.385	3.5199	1.81553	1.77576e-28	5.88424e-27
SIPA1L2	ENSG00000116991	266.281	148.096	384.467	2.59607	1.37633	2.24145e-12	2.95371e-11
KCNQ4	ENSG00000117013	388.934	561.661	216.208	0.384943	-1.37728	5.57656e-11	6.62331e-10
RIMS3	ENSG00000117016	8254.6	13206.4	3302.8	0.250091	-1.99947	1.60099e-17	3.05544e-16
SLAMF1	ENSG00000117090	40.2497	3.5517	76.9477	21.665	4.4373	3.70602e-16	6.47653e-15
LPHN2	ENSG00000117114	1684.63	2306.67	1062.6	0.460664	-1.11821	1.7358e-16	3.08856e-15
PADI2	ENSG00000117115	287.908	448.752	127.064	0.28315	-1.82036	9.24835e-09	8.87279e-08
GBP3	ENSG00000117226	152.016	94.3246	209.708	2.22326	1.15268	5.79494e-07	4.50246e-06
GBP1	ENSG00000117228	10.0547	0.908557	19.2008	21.1332	4.40144	5.25901e-05	0.000306088
RAB7L1	ENSG00000117280	771.773	237.301	1306.24	5.5046	2.46064	3.47014e-53	2.56628e-51
GALE	ENSG00000117308	520.933	344.265	697.6	2.02634	1.01888	5.5758e-10	6.05512e-09
ID3	ENSG00000117318	28.4249	2.31266	54.5371	23.582	4.55961	1.11764e-12	1.5085e-11
SLC2A1	ENSG00000117394	16272.4	5893.41	26651.4	4.52224	2.17704	1.09072e-64	1.10229e-62
ARTN	ENSG00000117407	182.901	72.2719	293.531	4.06148	2.022	6.21773e-19	1.28696e-17
IPO13	ENSG00000117408	2736.28	1415.47	4057.08	2.86623	1.51915	8.71307e-30	3.02856e-28
ATP6V0B	ENSG00000117410	15725.1	6820.71	24629.5	3.611	1.8524	2.08918e-48	1.33024e-46
PRDX1	ENSG00000117450	5713.69	3210.55	8216.84	2.55933	1.35576	8.46594e-23	2.17178e-21
CNN3	ENSG00000117519	311.48	516.065	106.895	0.207134	-2.27136	4.99314e-30	1.75489e-28
F3	ENSG00000117525	504.343	746.587	262.098	0.351062	-1.5102	2.53118e-16	4.45909e-15
TNFSF4	ENSG00000117586	74.5023	24.8612	124.143	4.99347	2.32004	2.2375e-12	2.9504e-11
HSD11B1	ENSG00000117594	90.6436	42.042	139.245	3.31206	1.72773	8.38053e-09	8.10041e-08
STMN1	ENSG00000117632	6773.91	9446.28	4101.53	0.434196	-1.20358	7.41499e-22	1.82312e-20
NEK2	ENSG00000117650	273.497	385.063	161.931	0.420531	-1.24972	1.98568e-07	1.63306e-06
RPS6KA1	ENSG00000117676	12922	5217.92	20626.1	3.95293	1.98292	3.13505e-54	2.38046e-52
2019-03-02	ENSG00000117791	15.2715	24.9441	5.599	0.224462	-2.15545	0.00413222	0.0166355
ESYT2	ENSG00000117868	10130.8	5507.71	14753.8	2.67876	1.42157	1.13357e-29	3.92574e-28
CTSD	ENSG00000117984	11682.1	2580.1	20784.2	8.05558	3.00999	2.94623e-112	7.53756e-110
NRP2	ENSG00000118257	625.755	157.843	1093.67	6.92883	2.79261	2.35295e-60	2.14852e-58
C1orf54	ENSG00000118292	547.206	342.196	752.217	2.19821	1.13633	1.22597e-12	1.64533e-11
LRMP	ENSG00000118308	2259.21	1178.48	3339.95	2.83412	1.5029	1.92251e-29	6.64988e-28
CNR1	ENSG00000118432	361.056	603.035	119.076	0.197461	-2.34036	3.20912e-34	1.30938e-32
TNFAIP3	ENSG00000118503	1231.46	346.906	2116.02	6.09969	2.60874	3.41445e-68	3.75828e-66
AKAP7	ENSG00000118507	122.468	183.364	61.5711	0.335786	-1.57439	2.65762e-09	2.68485e-08
SGK1	ENSG00000118515	1464.86	46.5844	2883.14	61.8906	5.95165	4.5378e-136	1.69559e-133
CTGF	ENSG00000118523	102.139	60.709	143.568	2.36486	1.24176	1.48731e-05	9.50846e-05
PMFBP1	ENSG00000118557	32.5799	48.1532	17.0067	0.353178	-1.50153	0.0031166	0.0129054
RPN2	ENSG00000118705	8539.94	5326.51	11753.4	2.20658	1.14181	1.9216e-19	4.12469e-18
TGIF2	ENSG00000118707	952.219	1293.22	611.214	0.472629	-1.08122	1.31919e-10	1.51974e-09
SPP1	ENSG00000118785	2064.39	25.1102	4103.68	163.427	7.3525	1.18154e-295	4.19419e-292
RARRES1	ENSG00000118849	9.91027	16.9325	2.88808	0.170564	-2.55161	0.00508021	0.0200066
CCND2	ENSG00000118971	39.5106	68.3076	10.7137	0.156845	-2.67259	1.3708e-08	1.29286e-07
ELL2	ENSG00000118985	235.29	118.03	352.55	2.98696	1.57868	1.98985e-14	3.05447e-13
KLF9	ENSG00000119138	405.684	222.679	588.688	2.64367	1.40254	4.94044e-16	8.55479e-15
PIGZ	ENSG00000119227	208.723	305.937	111.51	0.364488	-1.45606	5.63559e-11	6.68502e-10
C1orf198	ENSG00000119280	509.46	325.599	693.321	2.12937	1.09043	9.74664e-11	1.13669e-09
FKBP15	ENSG00000119321	1272.34	734.778	1809.9	2.46319	1.30053	4.1729e-20	9.34559e-19
CTNNAL1	ENSG00000119326	291.237	423.058	159.415	0.376815	-1.40807	8.31031e-13	1.13025e-11
NEK6	ENSG00000119408	5972.9	1594.7	10351.1	6.49094	2.69843	5.06716e-91	9.34397e-89
BSPRY	ENSG00000119411	526.433	762.288	290.578	0.381191	-1.39141	1.01439e-16	1.829e-15
HSDL2	ENSG00000119471	584.217	857.188	311.246	0.363101	-1.46156	5.66627e-19	1.17539e-17
NR4A3	ENSG00000119508	53.401	14.1235	92.6785	6.56198	2.71413	1.6844e-09	1.73941e-08
CSF3R	ENSG00000119535	2991.99	3999.92	1984.06	0.496025	-1.01152	7.41186e-15	1.17456e-13
ONECUT2	ENSG00000119547	706.685	975.783	437.587	0.448447	-1.15699	0.0108431	0.0394901
IFI27L2	ENSG00000119632	513.204	293.713	732.694	2.49459	1.3188	8.53459e-16	1.45129e-14
ACYP1	ENSG00000119640	79.5326	115.386	43.6787	0.378543	-1.40147	0.00079523	0.00373272
NPC2	ENSG00000119655	2289.47	839.436	3739.5	4.45477	2.15535	1.27384e-54	9.91079e-53
IRF2BPL	ENSG00000119669	766.034	408.939	1123.13	2.74645	1.45757	3.09987e-21	7.38508e-20
ACOT2	ENSG00000119673	1447.07	946.478	1947.66	2.0578	1.0411	5.59057e-14	8.2645e-13
LTBP2	ENSG00000119681	180.224	107.79	252.657	2.34397	1.22895	4.70385e-07	3.68496e-06
TGFB3	ENSG00000119699	70.9739	107.128	34.8195	0.325026	-1.62137	1.13035e-06	8.4562e-06
ALDH6A1	ENSG00000119711	408.42	566.698	250.141	0.441401	-1.17984	1.15953e-11	1.44931e-10
GPR68	ENSG00000119714	290.594	46.5844	534.603	11.476	3.52055	7.82266e-58	6.57242e-56
KLHL29	ENSG00000119771	109.236	150.738	67.7341	0.44935	-1.15409	1.52179e-05	9.72013e-05
YPEL5	ENSG00000119801	790.948	497.729	1084.17	2.17823	1.12316	1.3655e-07	1.15067e-06
BCL11A	ENSG00000119866	224.054	412.902	35.2063	0.0852653	-3.5519	8.55857e-48	5.36526e-46
SLC17A5	ENSG00000119899	1915.92	834.478	2997.35	3.59189	1.84474	1.9787e-40	9.99844e-39
OGFRL1	ENSG00000119900	1027.33	564.547	1490.12	2.63949	1.40026	1.08892e-21	2.64754e-20
IFIT3	ENSG00000119917	620.136	108.283	1131.99	10.4539	3.38597	9.77029e-82	1.50355e-79
NKX2-3	ENSG00000119919	27.2113	45.7584	8.66423	0.189347	-2.40089	7.36881e-06	4.93536e-05
IFIT2	ENSG00000119922	171.152	59.635	282.669	4.73998	2.24488	1.11941e-20	2.58028e-19
PYROXD2	ENSG00000119943	195.305	114.974	275.635	2.39737	1.26145	5.43854e-09	5.35891e-08
HELLS	ENSG00000119969	249.599	379.364	119.835	0.315884	-1.66253	1.25611e-14	1.96318e-13
CCDC147	ENSG00000120051	27.6802	11.1503	44.2102	3.96494	1.9873	9.10129e-05	0.000506583
MOB3B	ENSG00000120162	38.5918	19.8236	57.3601	2.89353	1.53283	0.000498116	0.00242569
CCDC170	ENSG00000120262	34.0526	53.3577	14.7476	0.276391	-1.85522	0.000110141	0.00060312
CYSTM1	ENSG00000120306	441.489	278.93	604.047	2.16558	1.11476	9.23181e-11	1.07887e-09
ARAP3	ENSG00000120318	343.107	134.137	552.076	4.11576	2.04116	3.94701e-27	1.2399e-25
TNN	ENSG00000120332	46.71	72.0251	21.3948	0.297047	-1.75124	9.91078e-06	6.50142e-05
TNFSF18	ENSG00000120337	10.0197	0	20.0394	Inf	Inf	1.58616e-06	1.15764e-05
TEX11	ENSG00000120498	8.59682	1.81711	15.3765	8.46206	3.08101	0.00333024	0.0137002
KIAA1217	ENSG00000120549	9.91171	0.413013	19.4104	46.9971	5.5545	1.30573e-05	8.41585e-05
PLXDC2	ENSG00000120594	1020.4	204.509	1836.29	8.97903	3.16656	6.12733e-88	1.05457e-85
IQSEC3	ENSG00000120645	13.1492	1.32157	24.9769	18.8994	4.24027	6.11529e-06	4.13678e-05
ENOX1	ENSG00000120658	16.5288	4.70821	28.3493	6.02125	2.59006	0.000298277	0.00151665
TNFSF11	ENSG00000120659	18.6309	5.12086	32.141	6.27649	2.64996	5.20569e-05	0.000303404
HSPH1	ENSG00000120694	2042.34	1197.4	2887.28	2.4113	1.26981	8.33153e-22	2.04317e-20
KBTBD7	ENSG00000120696	119.139	184.355	53.9227	0.292493	-1.77353	3.1668e-11	3.84156e-10
EXOSC8	ENSG00000120699	990.128	1449.98	530.277	0.365713	-1.45122	9.34449e-23	2.39283e-21
SIL1	ENSG00000120725	790.821	330.058	1251.58	3.79201	1.92296	1.83639e-35	7.90148e-34
PLS1	ENSG00000120756	29.7394	42.5371	16.9416	0.398279	-1.32815	0.00647554	0.0249244
TMPO	ENSG00000120802	2728.09	3814.16	1642.02	0.430507	-1.21589	9.99593e-21	2.30972e-19
MTERFD3	ENSG00000120832	67.3977	97.2975	37.4979	0.385394	-1.37559	0.00246748	0.0104366
SOCS2	ENSG00000120833	121.283	216.652	25.9131	0.119607	-3.06363	7.53808e-25	2.14495e-23
DUSP4	ENSG00000120875	1868.17	305.112	3431.22	11.2458	3.49131	1.64954e-120	4.82925e-118
CLU	ENSG00000120885	234.265	90.7747	377.755	4.16146	2.05709	4.27193e-22	1.05767e-20
PTK2B	ENSG00000120899	13469.4	6471.07	20467.8	3.16297	1.66128	8.87116e-40	4.44309e-38
CHRNA2	ENSG00000120903	6.92127	1.32157	12.521	9.4743	3.24402	0.00586297	0.0227859
PPP3CC	ENSG00000120910	414.427	221.196	607.658	2.74715	1.45793	1.5805e-15	2.63553e-14
EPHX2	ENSG00000120915	275.968	480.798	71.139	0.14796	-2.75672	3.11472e-38	1.50173e-36
ZNF706	ENSG00000120963	2265.17	1464.93	3065.41	2.09253	1.06525	1.12689e-15	1.90144e-14
RDH10	ENSG00000121039	222.152	114.975	329.33	2.86438	1.51822	1.12518e-12	1.51723e-11
SCPEP1	ENSG00000121064	2635.01	1153.38	4116.64	3.5692	1.8356	4.71822e-43	2.58166e-41
TBX2	ENSG00000121068	344.978	181.136	508.82	2.80906	1.49009	5.07465e-16	8.78184e-15
SLC35B1	ENSG00000121073	1528.55	870.902	2186.19	2.51026	1.32784	3.68952e-21	8.74584e-20
TBX4	ENSG00000121075	60.3488	103.658	17.0392	0.164378	-2.60491	5.52471e-11	6.56722e-10
NCAPH	ENSG00000121152	1117.4	1574.88	659.922	0.41903	-1.25487	1.63217e-18	3.31074e-17
MND1	ENSG00000121211	344.495	502.76	186.231	0.370418	-1.43277	0.000347889	0.0017467
ABCC11	ENSG00000121270	7.6603	13.5458	1.77478	0.13102	-2.93214	0.00738367	0.0280061
PAPD5	ENSG00000121274	286.371	175.271	397.472	2.26776	1.18127	5.20231e-10	5.6734e-09
TSHZ3	ENSG00000121297	271.344	394.071	148.618	0.377136	-1.40684	3.04747e-13	4.29916e-12
ZNF549	ENSG00000121406	131.326	182.621	80.0308	0.438233	-1.19023	5.08047e-06	3.4807e-05
LHX4	ENSG00000121454	48.0359	76.4842	19.5876	0.256099	-1.96523	7.94141e-07	6.05911e-06
CSTA	ENSG00000121552	1975.02	2903.11	1046.93	0.360624	-1.47143	6.82373e-28	2.18714e-26
CAT	ENSG00000121691	7803.91	12365.6	3242.17	0.262192	-1.9313	8.3746e-51	5.88668e-49
PILRB	ENSG00000121716	60.7158	82.5133	38.9184	0.471662	-1.08418	0.00350703	0.014334
CCRL2	ENSG00000121797	11.1959	1.23904	21.1527	17.0718	4.09355	7.09036e-05	0.000402463
TNFSF10	ENSG00000121858	187.379	114.728	260.031	2.26651	1.18047	1.72362e-07	1.42954e-06
LIAS	ENSG00000121897	163.727	218.799	108.655	0.496596	-1.00985	2.60599e-05	0.000160496
ADORA3	ENSG00000121933	203.562	43.1985	363.925	8.4245	3.07459	1.61761e-37	7.5183e-36
GPSM2	ENSG00000121957	445.609	670.185	221.033	0.329809	-1.6003	9.24591e-14	1.34995e-12
CXCR4	ENSG00000121966	533.31	781.949	284.671	0.364054	-1.45778	2.67642e-09	2.70096e-08
ZRANB3	ENSG00000121988	99.1326	150.408	47.8573	0.318183	-1.65207	3.26231e-08	2.95889e-07
ACVR2A	ENSG00000121989	55.2008	30.8081	79.5936	2.58353	1.36934	0.00016869	0.000897338
SASH3	ENSG00000122122	195.053	105.806	284.299	2.68698	1.42598	8.08237e-11	9.48835e-10
LAX1	ENSG00000122188	11.3556	20.4845	2.2266	0.108697	-3.20162	0.00688169	0.0263307
ANXA11	ENSG00000122359	10250.5	5496.85	15004.1	2.72958	1.44868	5.12508e-30	1.79904e-28
EEPD1	ENSG00000122547	174.527	79.2928	269.761	3.40209	1.76642	2.58864e-14	3.92693e-13
WIPF3	ENSG00000122574	110.724	9.49859	211.949	22.3138	4.47986	1.80377e-38	8.77927e-37
HOXA7	ENSG00000122592	12.487	22.0533	2.92059	0.132433	-2.91667	0.00104891	0.00478871
INHBA	ENSG00000122641	27.5797	3.22122	51.9382	16.1238	4.01112	1.26206e-10	1.45869e-09
ARL4A	ENSG00000122644	356.026	109.44	602.612	5.50633	2.46109	4.25124e-38	2.03244e-36
GLIPR2	ENSG00000122694	955.606	473.695	1437.52	3.03469	1.60155	1.53184e-26	4.72839e-25
KIAA1549	ENSG00000122778	253.362	339.143	167.58	0.494127	-1.01705	5.91368e-07	4.58843e-06
NUDT10	ENSG00000122824	16.5622	2.72567	30.3988	11.1528	3.47933	3.41161e-06	2.3969e-05
NEUROG3	ENSG00000122859	127.468	174.197	80.7394	0.463496	-1.10937	1.11784e-05	7.26586e-05
PLAU	ENSG00000122861	1334.09	522.675	2145.51	4.10486	2.03733	5.16383e-45	2.97449e-43
BICC1	ENSG00000122870	21.2253	35.3516	7.09911	0.200814	-2.31607	8.7854e-05	0.000490828
EGR2	ENSG00000122877	560.493	32.0482	1088.94	33.9782	5.08654	3.08191e-128	1.05446e-125
CIT	ENSG00000122966	1762.88	2822.75	703.018	0.249055	-2.00546	2.71048e-46	1.61367e-44
HVCN1	ENSG00000122986	463.155	219.047	707.262	3.22881	1.691	1.40785e-22	3.56013e-21
CDKN2C	ENSG00000123080	6946.18	9762.06	4130.29	0.423096	-1.24094	6.56815e-21	1.54151e-19
RNF11	ENSG00000123091	1726.6	850.999	2602.19	3.05781	1.6125	1.04582e-17	2.02035e-16
RASSF8	ENSG00000123094	73.1812	38.1594	108.203	2.83555	1.50363	2.51321e-06	1.79502e-05
NECAB1	ENSG00000123119	11.3963	20.566	2.2266	0.108266	-3.20735	0.0140489	0.0496098
GIPC1	ENSG00000123159	1335.05	792.686	1877.42	2.36843	1.24393	1.68296e-18	3.40889e-17
ATP7B	ENSG00000123191	121.222	167.754	74.6886	0.445225	-1.16739	4.88145e-06	3.35487e-05
CENPK	ENSG00000123219	284.275	422.723	145.828	0.344972	-1.53545	0.00167106	0.00734025
MMP19	ENSG00000123342	77.9134	29.6519	126.175	4.25521	2.08923	1.58387e-10	1.81366e-09
NR4A1	ENSG00000123358	157.804	244.403	71.204	0.291338	-1.77923	3.16906e-13	4.4574e-12
LRP1	ENSG00000123384	1440.7	865.621	2015.78	2.32871	1.21953	5.78982e-18	1.13628e-16
NFE2	ENSG00000123405	181.806	96.1431	267.47	2.782	1.47612	9.50532e-11	1.10946e-09
HJURP	ENSG00000123485	999.355	1399.76	598.947	0.427891	-1.22468	4.67173e-17	8.65413e-16
COL10A1	ENSG00000123500	3.80797	0	7.61595	Inf	Inf	0.00569449	0.0222071
AMD1	ENSG00000123505	2217.05	1425.53	3008.57	2.11049	1.07758	1.18235e-15	1.99148e-14
RAB9B	ENSG00000123570	41.8038	62.2778	21.3298	0.342495	-1.54585	0.000113723	0.000621655
ACVR1C	ENSG00000123612	55.6505	10.4897	100.811	9.61052	3.26461	2.92157e-15	4.80688e-14
SLC36A1	ENSG00000123643	825.486	453.787	1197.19	2.63821	1.39956	3.43492e-20	7.71716e-19
BATF3	ENSG00000123685	189.258	298.34	80.1754	0.268738	-1.89573	2.01874e-16	3.58077e-15
G0S2	ENSG00000123689	250.181	411.247	89.1143	0.216693	-2.20628	1.16043e-24	3.25631e-23
KCNJ2	ENSG00000123700	80.99	6.27737	155.703	24.8038	4.63249	1.1322e-30	4.05963e-29
RAB38	ENSG00000123892	18.2487	4.87327	31.6242	6.48932	2.69807	9.9412e-05	0.00054999
SLPI	ENSG00000124107	864.922	427.605	1302.24	3.04543	1.60665	5.04644e-26	1.52781e-24
SDC4	ENSG00000124145	654.608	179.896	1129.32	6.27764	2.65022	3.49402e-56	2.86773e-54
NCOA3	ENSG00000124151	1107.2	526.387	1688.02	3.20679	1.68113	6.45415e-31	2.32891e-29
PIGT	ENSG00000124155	3032.18	1822.68	4241.69	2.32717	1.21858	5.14221e-15	8.26889e-14
ATP5E	ENSG00000124172	2292.68	1398.2	3187.17	2.27948	1.18871	5.41245e-19	1.12438e-17
GDAP1L1	ENSG00000124194	24.7764	48.6491	0.903643	0.0185747	-5.75052	9.73224e-12	1.2229e-10
ZNFX1	ENSG00000124201	1845.01	829.687	2860.34	3.4475	1.78555	3.26758e-38	1.57276e-36
SNAI1	ENSG00000124216	341.593	74.0898	609.097	8.22106	3.03932	9.23547e-51	6.47577e-49
PMEPA1	ENSG00000124225	158.003	39.4813	276.524	7.00392	2.80816	3.10281e-28	1.01396e-26
SEMG1	ENSG00000124233	36.7763	15.0321	58.5205	3.89304	1.9609	0.00380152	0.0154377
KCNK15	ENSG00000124249	42.7414	65.8302	19.6526	0.298534	-1.74403	3.66752e-05	0.000220098
PEPD	ENSG00000124299	737.678	357.811	1117.54	3.12329	1.64306	7.65664e-26	2.29602e-24
IQSEC2	ENSG00000124313	649.191	280.003	1018.38	3.63702	1.86276	7.57827e-31	2.73106e-29
NAGK	ENSG00000124357	894.262	490.705	1297.82	2.6448	1.40316	3.98775e-10	4.41497e-09
ATP8A1	ENSG00000124406	73.8425	29.8995	117.785	3.93938	1.97797	1.53857e-09	1.59694e-08
ZNF576	ENSG00000124444	197.38	128.852	265.908	2.06367	1.04521	3.72638e-05	0.0002233
F13A1	ENSG00000124491	74.3485	135.789	12.9078	0.0950574	-3.39506	7.66354e-20	1.68836e-18
TRERF1	ENSG00000124496	2825.86	1363.51	4288.21	3.14498	1.65305	4.35797e-36	1.91575e-34
ABCC10	ENSG00000124574	670.138	445.86	894.415	2.00604	1.00435	1.31955e-10	1.51974e-09
NQO2	ENSG00000124588	341.011	223.095	458.928	2.0571	1.04061	1.66192e-08	1.55503e-07
ZNF391	ENSG00000124613	39.4024	62.5247	16.2802	0.26038	-1.94131	0.000513868	0.00249535
HIST1H2BJ	ENSG00000124635	36.1575	15.8585	56.4565	3.56001	1.83188	5.08418e-05	0.000297018
TREM1	ENSG00000124731	9.62086	3.13869	16.103	5.1305	2.3591	0.00875405	0.0326208
CDKN1A	ENSG00000124762	19645.4	3733.57	35557.2	9.52365	3.25151	1.25029e-130	4.4944e-128
SOX4	ENSG00000124766	573.187	279.589	866.785	3.10021	1.63237	3.72962e-23	9.74367e-22
GLO1	ENSG00000124767	8640.21	5096.8	12183.6	2.39045	1.25728	5.25051e-23	1.3592e-21
CPNE5	ENSG00000124772	43.1922	23.4578	62.9266	2.68255	1.4236	0.000622878	0.00297786
EEF1E1	ENSG00000124802	99.8812	136.449	63.3134	0.464008	-1.10778	6.9456e-05	0.000394798
EMC3	ENSG00000125037	1809.93	1086.48	2533.38	2.33172	1.2214	4.78558e-19	1.00001e-17
SH3TC1	ENSG00000125089	813.441	132.982	1493.9	11.2339	3.48978	1.82607e-94	3.57634e-92
GPR18	ENSG00000125245	142.768	87.8821	197.654	2.24908	1.16933	1.35723e-06	1.00189e-05
TMTC4	ENSG00000125247	335.1	450.812	219.388	0.486651	-1.03904	1.84659e-08	1.71989e-07
RAP2A	ENSG00000125249	132.701	87.9647	177.437	2.01714	1.01231	3.45277e-05	0.000208178
SLC10A2	ENSG00000125255	16.767	33.5341	0	0	#NAME?	8.24227e-10	8.76316e-09
EFNB2	ENSG00000125266	78.8263	37.3334	120.319	3.22283	1.68833	6.23676e-08	5.48163e-07
TM9SF2	ENSG00000125304	3822.48	2420.34	5224.62	2.15864	1.11012	3.40359e-15	5.58055e-14
2019-09-06	ENSG00000125354	2809.46	4416.87	1202.06	0.272152	-1.87752	1.34491e-44	7.62986e-43
TMEM255A	ENSG00000125355	186.489	42.3724	330.606	7.80238	2.96391	1.96879e-33	7.81954e-32
BMP4	ENSG00000125378	103.191	67.2333	139.148	2.06963	1.04937	0.000155279	0.000829186
PTGER2	ENSG00000125384	16.3593	1.23904	31.4796	25.4064	4.66712	1.05605e-07	9.01948e-07
GRK4	ENSG00000125388	77.5348	105.228	49.8417	0.473654	-1.07809	0.00088332	0.00410146
SOX9	ENSG00000125398	4.12246	0	8.24491	Inf	Inf	0.00480505	0.019052
MBOAT7	ENSG00000125505	5829.45	3002.42	8656.49	2.88318	1.52766	1.67999e-26	5.16325e-25
IL1B	ENSG00000125538	6520.76	40.4742	13001	321.218	8.32741	0	0
PAX8	ENSG00000125618	49.4946	69.3819	29.6072	0.426729	-1.22861	0.000747879	0.003535
C3	ENSG00000125730	440.058	187.248	692.869	3.70028	1.88764	1.67409e-26	5.15627e-25
TNFSF14	ENSG00000125735	304.562	139.01	470.115	3.38189	1.75783	2.93823e-14	4.43593e-13
FOSB	ENSG00000125740	311.359	599.242	23.4768	0.0391775	-4.67383	5.33996e-79	7.50714e-77
RTN2	ENSG00000125744	537.738	322.955	752.52	2.33011	1.2204	1.66492e-13	2.39031e-12
VASP	ENSG00000125753	12518.8	4841.18	20196.5	4.1718	2.06067	4.49338e-58	3.80904e-56
NKX2-4	ENSG00000125816	696.538	1146.03	247.044	0.215564	-2.21381	4.45767e-42	2.36615e-40
BMP2	ENSG00000125845	119.839	75.2456	164.432	2.18527	1.12781	1.56426e-05	9.96007e-05
OVOL2	ENSG00000125850	92.2803	164.698	19.8622	0.120598	-3.05173	3.55532e-20	7.98135e-19
DSTN	ENSG00000125868	2165.85	1185.35	3146.36	2.65437	1.40837	3.08596e-25	8.98821e-24
LAMP5	ENSG00000125869	878.011	1404.39	351.629	0.250378	-1.99782	6.07184e-39	2.99355e-37
MCM8	ENSG00000125885	167.787	251.752	83.8225	0.332956	-1.58659	1.82226e-06	1.31978e-05
ID1	ENSG00000125968	51.5525	17.428	85.6769	4.91605	2.2975	7.71225e-09	7.50068e-08
ROMO1	ENSG00000125995	645.05	355.248	934.851	2.63155	1.39591	4.54668e-19	9.51486e-18
CAPNS1	ENSG00000126247	6947.55	4038.52	9856.58	2.44064	1.28726	4.05149e-10	4.47856e-09
KIRREL2	ENSG00000126259	137.114	189.808	84.419	0.44476	-1.1689	3.08705e-06	2.17912e-05
FFAR2	ENSG00000126262	4.22728	0	8.45457	Inf	Inf	0.00455331	0.0181608
HCST	ENSG00000126264	880.17	440.573	1319.77	2.99557	1.58283	8.52162e-26	2.55002e-24
THRA	ENSG00000126351	625.766	856.369	395.163	0.46144	-1.11579	6.15642e-07	4.76896e-06
CCR7	ENSG00000126353	63.8491	91.1041	36.5942	0.401675	-1.3159	0.000132247	0.00071466
NR1D1	ENSG00000126368	128.718	179.649	77.7863	0.43299	-1.2076	2.3909e-06	1.71154e-05
RRAS	ENSG00000126458	564.261	217.148	911.375	4.19702	2.06937	2.55873e-35	1.09103e-33
FLRT1	ENSG00000126500	681.328	1230.37	132.291	0.107522	-3.2173	1.3657e-69	1.57655e-67
STAT5A	ENSG00000126561	889.285	576.943	1201.63	2.08275	1.05849	1.2182e-12	1.63722e-11
GLIS2	ENSG00000126603	213.812	300.076	127.548	0.425054	-1.23428	8.83567e-09	8.51138e-08
IFI6	ENSG00000126709	6855.23	308.087	13402.4	43.5018	5.443	6.27833e-275	1.78292e-271
CFP	ENSG00000126759	265.552	160.984	370.121	2.29911	1.20108	2.58083e-06	1.83778e-05
SIX1	ENSG00000126778	119.463	171.966	66.9605	0.389381	-1.36074	2.95415e-07	2.37587e-06
L3HYPDH	ENSG00000126790	199.924	268.024	131.824	0.491838	-1.02375	3.72625e-05	0.0002233
HSPA2	ENSG00000126803	67.9042	97.7937	38.0147	0.388723	-1.36318	9.85558e-05	0.000545785
SGPP1	ENSG00000126821	223.515	129.429	317.601	2.45386	1.29505	8.6812e-10	9.19197e-09
EVI2A	ENSG00000126860	336.468	94.7376	578.199	6.10316	2.60956	1.53294e-40	7.78755e-39
AIF1L	ENSG00000126878	28.3352	45.9241	10.7462	0.233999	-2.09543	0.000101728	0.00056149
AVPR2	ENSG00000126895	24.1653	34.9386	13.3921	0.383304	-1.38344	0.0114559	0.0414533
ZC4H2	ENSG00000126970	167.995	257.622	78.3682	0.304199	-1.71691	1.25952e-07	1.06738e-06
RGS13	ENSG00000127074	26.0958	0.495544	51.6961	104.322	6.7049	1.62885e-14	2.52214e-13
RAP1B	ENSG00000127314	2745.44	1515.73	3975.16	2.6226	1.391	1.77436e-25	5.21079e-24
FGFRL1	ENSG00000127418	2163.13	1115.15	3211.12	2.87955	1.52584	9.92612e-29	3.31626e-27
AUNIP	ENSG00000127423	164.282	221.525	107.039	0.483192	-1.04933	3.53629e-06	2.4796e-05
EMR2	ENSG00000127507	2080.4	390.104	3770.7	9.66589	3.2729	2.62699e-110	6.54398e-108
KLF2	ENSG00000127528	327.999	565.546	90.4519	0.159937	-2.64442	2.52345e-09	2.55749e-08
SYNGR3	ENSG00000127561	17.3201	29.7352	4.90502	0.164957	-2.59984	0.00017992	0.000950578
PKMYT1	ENSG00000127564	1384.83	1968.37	801.281	0.407078	-1.29662	3.53406e-15	5.77778e-14
CHTF18	ENSG00000127586	1071.47	1603.12	539.815	0.336728	-1.57034	2.37932e-26	7.2732e-25
PNKD	ENSG00000127838	981.241	560.751	1401.73	2.49974	1.32178	2.7285e-19	5.81711e-18
GNG11	ENSG00000127920	315.636	28.7434	602.529	20.9624	4.38973	9.35609e-80	1.35558e-77
PTPN12	ENSG00000127947	1646.07	1020.31	2271.83	2.22661	1.15485	1.89961e-17	3.60595e-16
GNAI1	ENSG00000127955	167.602	75.5753	259.63	3.43537	1.78047	1.71336e-14	2.65156e-13
PAICS	ENSG00000128050	3029.39	4367.31	1691.48	0.387305	-1.36846	1.01165e-25	3.00825e-24
MGAT3	ENSG00000128268	11.0362	1.4041	20.6683	14.72	3.8797	0.00179287	0.00780409
CDC42EP1	ENSG00000128283	1751.47	2573.99	928.96	0.360903	-1.47032	8.62405e-07	6.53954e-06
TPST2	ENSG00000128294	2858.47	690.347	5026.6	7.28126	2.86419	3.01588e-93	5.82619e-91
APOL2	ENSG00000128335	340.187	165.524	514.85	3.11042	1.63711	4.39025e-18	8.66395e-17
RAC2	ENSG00000128340	11701.9	5994.59	17409.1	2.90414	1.53811	1.87424e-33	7.45445e-32
RIBC2	ENSG00000128408	192.965	318.243	67.687	0.212689	-2.23318	2.8635e-21	6.83916e-20
DOCK4	ENSG00000128512	173.381	18.9143	327.848	17.3334	4.11548	5.31092e-50	3.59951e-48
ATP6V1F	ENSG00000128524	3823.59	1570.66	6076.52	3.86876	1.95187	1.50445e-49	1.00289e-47
VGF	ENSG00000128564	55.9957	33.204	78.7875	2.37283	1.24661	0.000553055	0.00267239
PODXL	ENSG00000128567	205.949	280.334	131.564	0.469312	-1.09138	1.9014e-07	1.56692e-06
FOXP2	ENSG00000128573	524.891	704.462	345.321	0.490191	-1.02858	8.54491e-07	6.48126e-06
LRRC4	ENSG00000128594	63.9791	25.2745	102.684	4.06273	2.02245	8.0494e-09	7.79893e-08
CALU	ENSG00000128595	2726.68	1553.23	3900.14	2.51099	1.32825	1.10789e-23	2.97089e-22
SMO	ENSG00000128602	8.07306	15.0328	1.1133	0.0740579	-3.7552	0.00137141	0.00612058
MYO1B	ENSG00000128641	147.409	62.4429	232.376	3.72141	1.89585	2.96555e-14	4.47479e-13
CHN1	ENSG00000128656	9.17848	1.89965	16.4573	8.66336	3.11493	0.00230438	0.00981549
HOXD13	ENSG00000128714	14.4674	23.7876	5.14718	0.216381	-2.20835	0.00439207	0.0175547
TWSG1	ENSG00000128791	655.426	317.584	993.268	3.12758	1.64505	1.08913e-24	3.07141e-23
ARHGAP22	ENSG00000128805	82.3444	27.6701	137.019	4.95187	2.30797	9.01483e-13	1.22372e-11
ALDH1A2	ENSG00000128918	150.472	18.4191	282.524	15.3387	3.9391	2.3691e-42	1.2742e-40
FAM63B	ENSG00000128923	815.895	383.658	1248.13	3.25324	1.70188	1.10236e-29	3.82234e-28
DUT	ENSG00000128951	2009.2	2893.13	1125.27	0.388947	-1.36235	5.44719e-24	1.48597e-22
PALLD	ENSG00000129116	56.2912	16.2715	96.311	5.919	2.56535	1.79571e-11	2.22296e-10
TPH1	ENSG00000129167	7.04078	12.3068	1.77478	0.144211	-2.79375	0.0140324	0.0495699
CSRP3	ENSG00000129170	112.077	5.86436	218.29	37.2231	5.21813	2.48546e-44	1.40044e-42
FAM64A	ENSG00000129195	188.53	257.29	119.77	0.465506	-1.10313	3.81639e-07	3.02816e-06
CCL4	ENSG00000129277	35.7779	8.17738	63.3784	7.75046	2.95428	3.87297e-09	3.86453e-08
SLC44A2	ENSG00000129353	244.858	88.213	401.503	4.55152	2.18635	5.19805e-25	1.48805e-23
MTUS1	ENSG00000129422	48.3335	3.63423	93.0328	25.599	4.67802	7.74119e-09	7.52085e-08
SIGLEC9	ENSG00000129450	24.6455	1.32157	47.9694	36.2972	5.18179	5.43398e-12	6.98255e-11
KLK10	ENSG00000129451	5.36245	0.495544	10.2293	20.6427	4.36756	0.00571129	0.0222634
AJUBA	ENSG00000129474	925.93	1413.57	438.292	0.310061	-1.68938	1.2476e-20	2.86876e-19
DTD2	ENSG00000129480	113.185	162.716	63.6531	0.391191	-1.35405	6.79404e-07	5.22865e-06
PARP2	ENSG00000129484	348.884	516.972	180.795	0.349719	-1.51573	1.10515e-15	1.86588e-14
DAD1	ENSG00000129562	4167.71	1896.02	6439.4	3.39627	1.76395	2.56424e-18	5.11372e-17
REEP5	ENSG00000129625	570.524	276.037	865.011	3.13368	1.64786	1.63299e-23	4.31784e-22
ITFG1	ENSG00000129636	637.595	424.215	850.975	2.006	1.00432	1.92151e-10	2.18618e-09
QRICH2	ENSG00000129646	182.46	325.679	39.2401	0.120487	-3.05305	8.79275e-34	3.53178e-32
RHBDF2	ENSG00000129667	1159.14	295.533	2022.74	6.84436	2.77492	1.86278e-73	2.36158e-71
FGF13	ENSG00000129682	15.1922	24.366	6.01832	0.246997	-2.01744	0.00473648	0.0188226
SGOL1	ENSG00000129810	133.27	188.898	77.6417	0.411024	-1.28271	3.88956e-07	3.08363e-06
TMEM8A	ENSG00000129925	4054.09	2072.04	6036.14	2.91314	1.54258	6.83803e-32	2.55845e-30
ABHD17A	ENSG00000129968	4296.05	2699.35	5892.74	2.18302	1.12633	1.84465e-18	3.7152e-17
PHF10	ENSG00000130024	2454.63	3306.25	1603	0.484839	-1.04442	3.94964e-15	6.41292e-14
STARD8	ENSG00000130052	1795.66	463.208	3128.11	6.75315	2.75556	5.61837e-80	8.22426e-78
GDPD2	ENSG00000130055	22.6729	0.991088	44.3548	44.7537	5.48393	1.18549e-11	1.48111e-10
SAT1	ENSG00000130066	744.17	377.88	1110.46	2.93866	1.55516	1.14935e-23	3.07339e-22
SH3BP4	ENSG00000130147	33.6595	64.673	2.64591	0.0409121	-4.61133	3.11659e-14	4.69119e-13
LDLR	ENSG00000130164	2283.69	1030.57	3536.81	3.43191	1.77901	2.68541e-39	1.32858e-37
PVRL2	ENSG00000130202	8101.59	3009.36	13193.8	4.38427	2.13234	2.9593e-60	2.69353e-58
APOE	ENSG00000130203	1095.72	110.35	2081.08	18.859	4.23718	1.4387e-137	5.59673e-135
APOC1	ENSG00000130208	223.721	88.3787	359.064	4.06279	2.02247	3.47544e-07	2.77079e-06
GADD45G	ENSG00000130222	5.13093	0	10.2619	Inf	Inf	0.00109679	0.00498907
NCAN	ENSG00000130287	17.4883	29.6523	5.32433	0.179559	-2.47747	0.000194307	0.00102033
PLVAP	ENSG00000130300	10.4553	0	20.9105	Inf	Inf	1.17917e-06	8.80289e-06
BST2	ENSG00000130303	3634.5	1490.38	5778.62	3.87728	1.95504	1.14999e-49	7.73869e-48
COLGALT1	ENSG00000130309	7978.06	5140.29	10815.8	2.10413	1.07322	4.73632e-12	6.11095e-11
SNX9	ENSG00000130340	1704.2	783.428	2624.97	3.35062	1.74443	9.64728e-37	4.34174e-35
ACSBG2	ENSG00000130377	17.3342	27.5043	7.16413	0.260473	-1.9408	0.00560377	0.0218894
MLLT4	ENSG00000130396	215.808	118.114	313.502	2.65423	1.40829	7.4013e-11	8.7068e-10
ARPC1B	ENSG00000130429	6275.21	3019.08	9531.35	3.15704	1.65857	1.99413e-38	9.68024e-37
FCHO1	ENSG00000130475	709.439	1021.65	397.23	0.388813	-1.36285	2.3133e-06	1.66101e-05
UNC13A	ENSG00000130477	50.8104	24.366	77.2549	3.1706	1.66476	1.16828e-05	7.5729e-05
MAP1S	ENSG00000130479	1395.15	809.289	1981.01	2.44784	1.29151	6.85921e-20	1.51822e-18
KLHDC7B	ENSG00000130487	106.377	200.298	12.4559	0.062187	-4.00724	3.92382e-32	1.48176e-30
GDF15	ENSG00000130513	988.05	153.961	1822.14	11.8351	3.565	2.69961e-103	5.94291e-101
KIAA1683	ENSG00000130518	121.539	70.9507	172.127	2.42601	1.27859	1.41847e-06	1.04303e-05
JUND	ENSG00000130522	4689.76	3095.92	6283.6	2.02964	1.02123	3.98522e-15	6.46699e-14
ZBTB46	ENSG00000130584	980.964	562.402	1399.53	2.48848	1.31526	1.82427e-19	3.92467e-18
HELZ2	ENSG00000130589	2804.62	1032.06	4577.19	4.43502	2.14894	3.70926e-56	3.0356e-54
TUBGCP2	ENSG00000130640	4593.3	2270.76	6915.85	3.04561	1.60673	4.76597e-35	2.0051e-33
MNX1	ENSG00000130675	339.968	573.06	106.877	0.186502	-2.42274	2.02778e-17	3.84413e-16
LAMA5	ENSG00000130702	441.561	625.59	257.533	0.411664	-1.28046	2.02821e-13	2.89287e-12
ASS1	ENSG00000130707	10065.5	14915.8	5215.32	0.349652	-1.51601	8.47862e-10	8.99424e-09
NPAS1	ENSG00000130751	239.195	358.718	119.672	0.333611	-1.58376	9.05772e-15	1.42598e-13
GMFG	ENSG00000130755	3697.04	2243.16	5150.93	2.29628	1.1993	9.14809e-21	2.12071e-19
MAP3K10	ENSG00000130758	337.22	207.071	467.368	2.25704	1.17443	1.97612e-10	2.24562e-09
SMPDL3B	ENSG00000130768	19.6283	31.8828	7.37378	0.231278	-2.1123	0.000879449	0.00408549
THEMIS2	ENSG00000130775	826.856	337.657	1316.05	3.89761	1.96259	7.29368e-37	3.29294e-35
C19orf66	ENSG00000130813	453.917	250.103	657.731	2.62984	1.39497	2.01262e-16	3.57214e-15
PLXNA3	ENSG00000130827	748.216	447.345	1049.09	2.34514	1.22967	6.91526e-16	1.18658e-14
DUSP9	ENSG00000130829	125.367	193.938	56.7962	0.292857	-1.77173	5.6079e-11	6.65774e-10
ZNF331	ENSG00000130844	105.197	171.056	39.3377	0.22997	-2.12048	1.18249e-06	8.82534e-06
SLC7A10	ENSG00000130876	43.3679	62.1131	24.6226	0.396416	-1.33491	0.00181185	0.00788309
ULBP2	ENSG00000131015	414.913	140.579	689.246	4.9029	2.29364	1.49522e-22	3.77098e-21
ATP6V1E1	ENSG00000131100	4222.54	2390.76	6054.31	2.53237	1.34049	4.07982e-25	1.17504e-23
ZNF141	ENSG00000131127	237.041	329.722	144.36	0.437824	-1.19158	0.00159733	0.00704364
GSE1	ENSG00000131149	6741.57	9076.73	4406.4	0.485461	-1.04257	1.08043e-16	1.94559e-15
GINS2	ENSG00000131153	631.769	874.542	388.996	0.4448	-1.16877	7.44254e-06	4.98122e-05
SH3BGRL	ENSG00000131171	3242.14	1955.55	4528.72	2.31583	1.21153	1.74589e-20	3.97592e-19
F12	ENSG00000131187	30.8578	44.3546	17.361	0.391413	-1.35324	0.00353206	0.0144261
CAP1	ENSG00000131236	379040	147040	611039	4.1556	2.05506	7.06147e-60	6.30603e-58
RAB11FIP4	ENSG00000131242	134.03	35.7646	232.296	6.49514	2.69936	3.19473e-23	8.36938e-22
ABCB7	ENSG00000131269	458.893	615.674	302.112	0.490701	-1.02708	1.38599e-09	1.44121e-08
SH3BP5	ENSG00000131370	142.021	61.6172	222.424	3.60978	1.85191	9.559e-09	9.15845e-08
RFTN1	ENSG00000131378	995.028	255.885	1734.17	6.77716	2.76068	1.70423e-69	1.95148e-67
SLC6A6	ENSG00000131389	1022.09	545.883	1498.3	2.74473	1.45666	3.25704e-23	8.52475e-22
LRRC4B	ENSG00000131409	119.114	165.524	72.7041	0.439235	-1.18693	4.57137e-06	3.15092e-05
PDLIM4	ENSG00000131435	543.31	118.197	968.424	8.19332	3.03445	3.57686e-64	3.55159e-62
MGAT1	ENSG00000131446	7365.26	3361.95	11368.6	3.38154	1.75768	9.88412e-43	5.36691e-41
DIAPH1	ENSG00000131504	15725.1	7144.9	24305.4	3.40178	1.76629	2.65936e-44	1.49545e-42
MAP1B	ENSG00000131711	1711.68	2770.03	653.325	0.235854	-2.08403	1.87225e-48	1.19748e-46
IL13RA1	ENSG00000131724	909.778	515.157	1304.4	2.53204	1.3403	7.11229e-19	1.46891e-17
TOP2A	ENSG00000131747	2978.68	4508.97	1448.4	0.321226	-1.63834	0.000522533	0.00253436
FMO5	ENSG00000131781	107.133	148.837	65.4279	0.439593	-1.18576	0.00227076	0.00969116
VIMP	ENSG00000131871	837.918	516.808	1159.03	2.24267	1.16522	6.40484e-15	1.02125e-13
C19orf40	ENSG00000131944	156.93	210.706	103.153	0.489561	-1.03044	0.000866378	0.00402872
ABHD12B	ENSG00000131969	27.277	13.9585	40.5956	2.90831	1.54018	0.00223586	0.00955372
LGALS3	ENSG00000131981	1282.49	304.783	2260.19	7.41573	2.89059	1.26858e-80	1.91623e-78
PODNL1	ENSG00000132000	63.5407	35.5163	91.5652	2.57812	1.36632	9.33991e-05	0.00051905
DNAJB1	ENSG00000132002	2928.88	1905.1	3952.66	2.07478	1.05296	1.25559e-15	2.1086e-14
ZSWIM4	ENSG00000132003	528.157	262.164	794.15	3.02921	1.59894	1.38914e-21	3.36594e-20
C19orf57	ENSG00000132016	224.571	378.954	70.1883	0.185216	-2.43272	8.6424e-27	2.69997e-25
TRIM21	ENSG00000132109	1583.15	972.993	2193.3	2.25418	1.1726	2.24841e-17	4.23974e-16
SPATA6	ENSG00000132122	70.5433	99.9417	41.145	0.41169	-1.28037	0.000178827	0.000945688
PPARG	ENSG00000132170	221.969	106.797	337.141	3.15684	1.65848	4.74958e-15	7.65486e-14
FCRLA	ENSG00000132185	10.3829	0	20.7659	Inf	Inf	6.55792e-07	5.0634e-06
ENOSF1	ENSG00000132199	922.733	1447.17	398.293	0.275222	-1.86133	2.7637e-34	1.12926e-32
EMILIN2	ENSG00000132205	5219.52	2168.25	8270.78	3.8145	1.93149	3.89876e-50	2.65508e-48
TRIM22	ENSG00000132274	341.006	61.8652	620.147	10.0242	3.32541	1.3819e-57	1.15082e-55
EFR3A	ENSG00000132294	994.373	644.995	1343.75	2.08335	1.05891	5.89063e-13	8.11655e-12
RAMP1	ENSG00000132329	505.043	28.4136	981.672	34.5494	5.11059	2.67461e-122	8.16706e-120
PTPRE	ENSG00000132334	2198.07	748.74	3647.4	4.87138	2.28433	9.58901e-61	8.84119e-59
SERPINF1	ENSG00000132386	2986.07	4150.92	1821.22	0.438751	-1.18853	9.38503e-12	1.18032e-10
COQ3	ENSG00000132423	82.4628	125.96	38.9655	0.309348	-1.6927	3.04678e-08	2.77316e-07
ITGB4	ENSG00000132470	102.264	158.091	46.4368	0.293735	-1.76741	8.67315e-10	9.18687e-09
WBP2	ENSG00000132471	4306.04	2635.94	5976.14	2.26718	1.1809	9.73813e-13	1.31939e-11
CLEC10A	ENSG00000132514	9.30461	0.908557	17.7007	19.4822	4.28408	0.00039864	0.00197739
RIN2	ENSG00000132669	164.122	0.413013	327.83	793.752	9.63254	3.85759e-79	5.47739e-77
NES	ENSG00000132688	253.442	15.941	490.942	30.7974	4.94474	5.56363e-79	7.78305e-77
MTL5	ENSG00000132749	1037.89	1466.76	609.032	0.415223	-1.26804	1.68977e-18	3.42026e-17
NASP	ENSG00000132780	4062.9	5512.22	2613.58	0.474143	-1.07661	8.33708e-10	8.85402e-09
VSTM2L	ENSG00000132821	98.4942	6.11195	190.876	31.23	4.96486	1.14738e-38	5.61781e-37
DMGDH	ENSG00000132837	10.0751	17.9236	2.2266	0.124227	-3.00894	0.00174138	0.00761851
ZBED3	ENSG00000132846	301.315	518.792	83.8371	0.161601	-2.6295	1.41944e-37	6.61891e-36
SLC14A2	ENSG00000132874	34.8934	13.2979	56.489	4.24797	2.08677	5.91228e-06	4.00805e-05
MTUS2	ENSG00000132938	52.1886	4.12977	100.247	24.2743	4.60136	2.3557e-21	5.65966e-20
POMP	ENSG00000132963	1429.21	750.72	2107.69	2.80756	1.48932	7.18137e-26	2.15806e-24
ALOX5AP	ENSG00000132965	4181.79	504.917	7858.67	15.5643	3.96017	1.20832e-88	2.13129e-86
CHRM3	ENSG00000133019	210.239	6.85545	413.622	60.3349	5.91492	3.8998e-80	5.76805e-78
MYH10	ENSG00000133026	154.427	233.002	75.8523	0.325543	-1.61908	0.00034919	0.001752
CHI3L1	ENSG00000133048	97080.8	11818.6	182343	15.4284	3.94752	1.42112e-185	1.18697e-182
MYBPH	ENSG00000133055	205.589	98.7863	312.392	3.1623	1.66097	1.81048e-14	2.79575e-13
PIK3C2B	ENSG00000133056	335.452	174.362	496.541	2.84776	1.50983	3.2857e-16	5.74906e-15
SLC41A1	ENSG00000133065	719.181	430.084	1008.28	2.34438	1.22921	2.42046e-15	4.00795e-14
TMCC2	ENSG00000133069	74.5721	41.2988	107.845	2.61134	1.38479	3.17747e-05	0.000192877
CCNA1	ENSG00000133101	1716.12	1037.33	2394.9	2.30871	1.20709	1.84436e-18	3.7152e-17
EPSTI1	ENSG00000133106	332.147	65.8292	598.466	9.0912	3.18447	1.54519e-54	1.19565e-52
RFXAP	ENSG00000133111	202.112	280.001	124.223	0.443652	-1.1725	5.44655e-08	4.82593e-07
RFC3	ENSG00000133119	565.183	819.768	310.599	0.378887	-1.40016	1.6258e-17	3.1007e-16
STARD13	ENSG00000133121	138.744	8.92051	268.568	30.1068	4.91202	2.31368e-50	1.59476e-48
MORC4	ENSG00000133131	124.239	178.243	70.2354	0.394042	-1.34358	1.83466e-07	1.51412e-06
SLC39A11	ENSG00000133195	732.164	390.849	1073.48	2.74653	1.45761	7.32859e-21	1.71431e-19
EPHB2	ENSG00000133216	25.6402	2.23013	49.0502	21.9943	4.45906	5.98726e-11	7.09329e-10
C1QTNF6	ENSG00000133466	130.7	179.482	81.9177	0.456411	-1.1316	8.8127e-06	5.82886e-05
GIMAP6	ENSG00000133561	809.141	398.698	1219.58	3.05892	1.61302	9.24021e-26	2.75924e-24
GIMAP4	ENSG00000133574	6.1256	0.908557	11.3426	12.4842	3.64204	0.00771532	0.029124
ADCK2	ENSG00000133597	843.219	394.814	1291.62	3.27147	1.70994	7.60044e-29	2.55945e-27
AGAP3	ENSG00000133612	2586.02	1517.14	3654.9	2.40907	1.26848	8.25761e-22	2.02854e-20
KRBA1	ENSG00000133619	233.345	320.312	146.377	0.456982	-1.12979	2.77265e-08	2.52932e-07
ZNF767	ENSG00000133624	275.912	390.182	161.641	0.414272	-1.27135	0.00044159	0.00217374
TMTC1	ENSG00000133687	1307.22	369.868	2244.56	6.06855	2.60135	1.03463e-68	1.15675e-66
LRRCC1	ENSG00000133739	211.5	327.076	95.9242	0.293278	-1.76966	0.00978314	0.0360573
E2F5	ENSG00000133740	97.7076	134.715	60.7	0.45058	-1.15014	5.40359e-05	0.000313523
ARNTL	ENSG00000133794	304.567	202.033	407.102	2.01503	1.0108	1.33387e-07	1.12535e-06
AMPD3	ENSG00000133805	430.231	134.387	726.076	5.40288	2.43373	5.03725e-40	2.53631e-38
MICALCL	ENSG00000133808	56.6051	20.4016	92.8085	4.54907	2.18557	9.22709e-09	8.85558e-08
MICAL2	ENSG00000133816	2718.58	1252.17	4184.99	3.34219	1.74079	2.01118e-38	9.74632e-37
TEX15	ENSG00000133863	13.1061	23.2917	2.92059	0.125392	-2.99548	0.0138025	0.0488642
RNF122	ENSG00000133874	249.619	151.318	347.92	2.29926	1.20117	2.59491e-09	2.62617e-08
GSC	ENSG00000133937	52.5176	73.3459	31.6892	0.432051	-1.21073	0.00121776	0.00549354
NUMB	ENSG00000133961	2598.85	1493.76	3703.94	2.4796	1.31011	2.6561e-23	6.99702e-22
TTC9	ENSG00000133985	20.4778	30.7263	10.2293	0.332919	-1.58676	0.00543669	0.0212948
ADAMDEC1	ENSG00000134028	32.1445	1.73458	62.5544	36.063	5.17245	4.89053e-10	5.34982e-09
CTIF	ENSG00000134030	1313.88	1813.33	814.431	0.449135	-1.15478	1.71619e-16	3.05556e-15
CD180	ENSG00000134061	314.215	31.3872	597.042	19.0218	4.24958	1.63378e-75	2.16804e-73
IRAK2	ENSG00000134070	125.856	43.9416	207.771	4.72834	2.24133	8.86035e-17	1.60469e-15
CAMK1	ENSG00000134072	1085.9	195.425	1976.37	10.1132	3.33816	3.95274e-97	8.07553e-95
BHLHE40	ENSG00000134107	1431.28	632.116	2230.44	3.52853	1.81907	4.08731e-37	1.8631e-35
ARL8B	ENSG00000134108	4522.92	2958.45	6087.39	2.05763	1.04098	2.76682e-08	2.52562e-07
PTPN22	ENSG00000134242	262.763	474.184	51.3418	0.108274	-3.20724	1.48776e-26	4.60234e-25
SORT1	ENSG00000134243	312.997	28.4132	597.58	21.0318	4.3945	4.52599e-80	6.65953e-78
TRIM45	ENSG00000134253	133.646	235.812	31.4796	0.133494	-2.90515	1.12127e-24	3.15578e-23
CD101	ENSG00000134256	63.3159	33.5341	93.0978	2.77621	1.47312	0.00012215	0.000663636
RSAD2	ENSG00000134321	243.019	99.1989	386.838	3.89962	1.96333	4.98167e-21	1.17695e-19
LPIN1	ENSG00000134324	825.251	368.544	1281.96	3.47844	1.79844	7.2114e-32	2.6946e-30
CMPK2	ENSG00000134326	854.488	260.015	1448.96	5.57259	2.47835	1.0504e-55	8.49833e-54
RAX	ENSG00000134438	219.723	374.084	65.3629	0.174728	-2.51682	2.84895e-13	4.0251e-12
KCTD1	ENSG00000134504	229.441	310.068	148.813	0.479937	-1.05908	2.4537e-07	1.99371e-06
CABLES1	ENSG00000134508	172.94	237.549	108.33	0.45603	-1.1328	3.07763e-07	2.46749e-06
EMP1	ENSG00000134531	2525.69	9.41606	5041.96	535.464	9.06465	0	0
LRP4	ENSG00000134569	70.2817	117.701	22.8624	0.194242	-2.36407	2.40259e-12	3.16021e-11
DDB2	ENSG00000134574	624.132	894.777	353.486	0.395055	-1.33987	2.11383e-09	2.16241e-08
SOX3	ENSG00000134595	43.751	82.5969	4.90502	0.059385	-4.07376	2.35099e-15	3.89746e-14
SPOCD1	ENSG00000134668	1050.39	1.23904	2099.54	1694.49	10.7266	1.71617e-263	3.74891e-260
PHC2	ENSG00000134686	2528.36	1455.12	3601.6	2.47513	1.30751	2.5056e-22	6.26355e-21
CYP2J2	ENSG00000134716	8.0095	15.1154	0.903643	0.0597831	-4.06412	0.00141177	0.00628885
DTNA	ENSG00000134769	2101.53	816.136	3386.92	4.14995	2.05309	2.19295e-50	1.51521e-48
SLC43A3	ENSG00000134802	1780.33	851.577	2709.08	3.18125	1.66959	1.27474e-33	5.09143e-32
C5AR2	ENSG00000134830	567.494	209.467	925.522	4.41847	2.14355	3.61519e-37	1.65055e-35
TMEM165	ENSG00000134851	893.992	567.276	1220.71	2.15188	1.1056	1.59072e-13	2.28841e-12
COL4A2	ENSG00000134871	19.1666	8.83798	29.4951	3.33731	1.73869	0.00461696	0.0183837
CLDN10	ENSG00000134873	5.3278	9.99413	0.661477	0.0661866	-3.91732	0.00900662	0.0334821
DZIP1	ENSG00000134874	323.875	476.83	170.92	0.358451	-1.48015	1.51601e-14	2.35255e-13
ADAMTS8	ENSG00000134917	93.8706	132.817	54.9239	0.413529	-1.27394	0.00202769	0.00872725
ACRV1	ENSG00000134940	17.3576	30.891	3.82423	0.123798	-3.01394	7.80036e-05	0.000439513
ETS1	ENSG00000134954	816.706	485.422	1147.99	2.36493	1.2418	2.87756e-16	5.04114e-15
SLC37A2	ENSG00000134955	863.24	203.602	1522.88	7.47967	2.90297	1.2278e-72	1.51596e-70
NREP	ENSG00000134986	3069.91	1436.36	4703.47	3.27457	1.71131	8.55993e-38	4.05141e-36
OSTF1	ENSG00000134996	1000.05	646.399	1353.7	2.09422	1.06641	6.72128e-14	9.87944e-13
ANXA1	ENSG00000135046	1300.31	449.324	2151.3	4.78787	2.25938	2.43336e-54	1.8626e-52
CTSL	ENSG00000135047	9050.55	866.438	17234.7	19.8914	4.31407	4.12368e-203	5.09149e-200
TMEM2	ENSG00000135048	591.697	90.5256	1092.87	12.0725	3.59365	2.72446e-67	2.95302e-65
PSAT1	ENSG00000135069	4827.88	7103.75	2552.01	0.359248	-1.47695	1.04958e-30	3.76813e-29
ADAM19	ENSG00000135074	19.6486	4.54279	34.7544	7.65046	2.93555	1.22594e-05	7.91773e-05
HAVCR2	ENSG00000135077	959.634	16.602	1902.67	114.605	6.84052	7.49928e-153	3.94379e-150
SDS	ENSG00000135094	171.652	17.2626	326.041	18.8871	4.23933	5.53971e-51	3.92311e-49
TBX3	ENSG00000135111	136.677	81.6058	191.747	2.34968	1.23246	1.1714e-06	8.7487e-06
OASL	ENSG00000135114	173.086	69.7953	276.376	3.95981	1.98543	9.71854e-17	1.75547e-15
CCDC64	ENSG00000135127	164.321	70.1254	258.516	3.68648	1.88225	3.42048e-15	5.60178e-14
DTX1	ENSG00000135144	7.42815	0.495544	14.3608	28.9798	4.85698	0.00610453	0.0236342
CD36	ENSG00000135218	298.036	133.063	463.009	3.47962	1.79893	4.21373e-20	9.4296e-19
PNPLA8	ENSG00000135241	256.869	169.982	343.756	2.02231	1.01601	1.96266e-07	1.61506e-06
TES	ENSG00000135269	970.887	603.619	1338.15	2.21689	1.14853	1.06279e-14	1.66471e-13
KHDC1	ENSG00000135314	112.67	166.349	58.9902	0.354617	-1.49567	8.00749e-08	6.94066e-07
NT5E	ENSG00000135318	1410	92.7568	2727.24	29.402	4.87784	2.24345e-177	1.67656e-174
MRAP2	ENSG00000135324	14.7565	25.0273	4.48571	0.179232	-2.4801	0.0043117	0.0172675
AKIRIN2	ENSG00000135334	2209.6	1358.64	3060.56	2.25266	1.17163	7.16944e-12	9.12176e-11
PRR5L	ENSG00000135362	686.125	290.494	1081.76	3.72385	1.8968	2.44318e-32	9.30046e-31
CD63	ENSG00000135404	16346.1	4111.36	28580.9	6.9517	2.79737	5.53864e-101	1.2099e-98
PRPH	ENSG00000135406	8.52488	15.0328	2.01694	0.134169	-2.89787	0.00677642	0.0259594
GDF11	ENSG00000135414	3129.32	658.791	5599.86	8.5002	3.0875	2.62289e-72	3.22446e-70
ITGA7	ENSG00000135424	834	278.432	1389.57	4.9907	2.31924	3.4451e-50	2.35744e-48
TESPA1	ENSG00000135426	12.9243	24.2835	1.56512	0.0644521	-3.95563	2.8844e-05	0.000176343
BLOC1S1	ENSG00000135441	192.204	124.969	259.438	2.07601	1.05381	1.50205e-06	1.1005e-05
TROAP	ENSG00000135451	437.436	675.476	199.396	0.295193	-1.76027	1.08256e-23	2.90573e-22
PAN2	ENSG00000135473	1203.47	1866.52	540.426	0.289537	-1.78818	1.38908e-34	5.74193e-33
ESPL1	ENSG00000135476	897.435	1421.01	373.865	0.263099	-1.92632	3.44946e-12	4.49142e-11
OS9	ENSG00000135506	6068.33	3962	8174.66	2.06327	1.04493	6.79231e-17	1.24441e-15
MAP7	ENSG00000135525	96.244	52.6138	139.874	2.65851	1.41062	8.63089e-07	6.54298e-06
CD164	ENSG00000135535	9472.12	3273.38	15670.9	4.78736	2.25923	2.19246e-68	2.44163e-66
LACE1	ENSG00000135537	188.619	263.566	113.672	0.431285	-1.21329	6.77552e-08	5.92035e-07
HEY2	ENSG00000135547	48.4586	1.81711	95.1001	52.3358	5.70973	1.5476e-23	4.10735e-22
PKIB	ENSG00000135549	223.385	128.107	318.664	2.48749	1.31469	1.68222e-06	1.22397e-05
TEC	ENSG00000135605	1168.22	442.633	1893.8	4.2785	2.0971	1.60586e-46	9.62095e-45
SEMA4F	ENSG00000135622	57.8772	32.6259	83.1285	2.54793	1.34933	0.000116597	0.000636144
EGR4	ENSG00000135625	82.5009	36.2605	128.741	3.55046	1.828	7.71077e-09	7.50068e-08
DYSF	ENSG00000135636	232.512	7.35099	457.673	62.2601	5.96024	4.73871e-83	7.73389e-81
EMX1	ENSG00000135638	9.78358	16.4369	3.13024	0.19044	-2.39259	0.0111681	0.0405616
GNS	ENSG00000135677	7565.63	1637.41	13493.9	8.24097	3.04281	7.56162e-107	1.76012e-104
KIAA0513	ENSG00000135709	99.5139	34.7731	164.255	4.72361	2.23989	3.13462e-14	4.71487e-13
CCDC102A	ENSG00000135736	185.476	286.695	84.2564	0.293889	-1.76666	4.29258e-15	6.94195e-14
SLC9A5	ENSG00000135740	86.7594	123.565	49.9538	0.404272	-1.3066	1.10192e-05	7.17223e-05
ZNF670	ENSG00000135747	112.262	185.429	39.0955	0.210839	-2.24579	9.88605e-15	1.55279e-13
ABCB10	ENSG00000135776	1220.73	1640.44	801.021	0.488295	-1.03417	2.75855e-13	3.90126e-12
KIAA1614	ENSG00000135835	138.55	80.9456	196.154	2.42328	1.27696	3.30659e-07	2.64286e-06
GPR55	ENSG00000135898	121.801	60.8737	182.729	3.00177	1.58581	1.72959e-09	1.78477e-08
SP110	ENSG00000135899	879.637	496.159	1263.12	2.54579	1.34811	2.07056e-19	4.44107e-18
DOCK10	ENSG00000135905	3251.56	555.538	5947.58	10.706	3.42034	1.81491e-116	5.10295e-114
HTR2B	ENSG00000135914	11.3466	0.991088	21.702	21.8972	4.45267	8.33992e-06	5.5297e-05
ITM2C	ENSG00000135916	16263.5	8332.99	24194.1	2.90341	1.53775	2.19199e-34	8.99538e-33
SERPINE2	ENSG00000135919	656.237	423.228	889.247	2.10111	1.07115	1.90713e-11	2.35575e-10
DNAJB2	ENSG00000135924	574.906	270.256	879.555	3.25453	1.70245	1.33412e-25	3.94649e-24
TMBIM1	ENSG00000135926	2765.11	1299.92	4230.3	3.25428	1.70234	2.32177e-36	1.03507e-34
CYP27A1	ENSG00000135929	37.106	23.2098	51.0021	2.19743	1.13582	0.0138735	0.0490756
ARMC9	ENSG00000135931	930.173	141.075	1719.27	12.1869	3.60726	4.97637e-104	1.10405e-101
CAB39	ENSG00000135932	3974.84	1636.4	6313.28	3.85802	1.94786	1.52844e-49	1.0165e-47
COX5B	ENSG00000135940	5164.27	2993.47	7335.07	2.45036	1.29299	1.09234e-24	3.07741e-23
ARHGEF4	ENSG00000136002	11.1484	20.7318	1.56512	0.0754939	-3.7275	0.000193182	0.00101479
ALDH1L2	ENSG00000136010	2475.16	3773.83	1176.48	0.311748	-1.68155	1.39275e-35	6.0017e-34
USP44	ENSG00000136014	23.2251	42.2067	4.24354	0.100542	-3.31413	3.89086e-07	3.0838e-06
PLXNC1	ENSG00000136040	353.759	139.093	568.425	4.08665	2.03092	6.78063e-28	2.17578e-26
KIAA1033	ENSG00000136051	557.932	357.061	758.802	2.12513	1.08755	8.2154e-09	7.95164e-08
SLC41A2	ENSG00000136052	37.1569	5.36881	68.9449	12.8417	3.68277	1.55617e-12	2.07669e-11
VILL	ENSG00000136059	353.545	574.459	132.631	0.230879	-2.11479	3.07675e-28	1.00661e-26
NEK3	ENSG00000136098	237.085	325.181	148.99	0.458177	-1.12602	2.07996e-07	1.70663e-06
PCDH8	ENSG00000136099	58.8766	88.71	29.0433	0.327396	-1.61089	8.36292e-05	0.000469163
TBC1D4	ENSG00000136111	79.6965	47.6584	111.735	2.34449	1.22927	8.57913e-05	0.000480343
THSD1	ENSG00000136114	31.1152	13.0503	49.1802	3.76852	1.914	6.40283e-05	0.000366514
ITM2B	ENSG00000136156	11272.8	3609.49	18936.1	5.2462	2.39127	1.13204e-55	9.10701e-54
SPRY2	ENSG00000136158	4387.81	718.427	8057.2	11.2151	3.48737	3.42076e-136	1.31274e-133
RCBTB2	ENSG00000136161	654.488	207.151	1101.82	5.31894	2.41114	2.93424e-48	1.8517e-46
LCP1	ENSG00000136167	34965.6	21698.8	48232.4	2.22282	1.15239	2.73829e-20	6.16668e-19
SCRN1	ENSG00000136193	637.729	1047.9	227.554	0.217151	-2.20323	9.93818e-40	4.96874e-38
TNS3	ENSG00000136205	5922.53	2623.29	9221.76	3.51534	1.81366	1.58078e-44	8.92463e-43
CHST12	ENSG00000136213	1983.84	1150.66	2817.01	2.44817	1.2917	2.89839e-21	6.91667e-20
GPNMB	ENSG00000136235	1368.8	61.3693	2676.23	43.6086	5.44654	1.43533e-197	1.63042e-194
TTYH3	ENSG00000136295	8558.33	5281.86	11834.8	2.24065	1.16392	3.69003e-19	7.76793e-18
ADAMTS7	ENSG00000136378	815.64	65.4997	1565.78	23.9051	4.57925	3.5985e-136	1.36254e-133
ABHD17C	ENSG00000136379	895.312	393.657	1396.97	3.54869	1.82729	4.53131e-33	1.76759e-31
MYCBPAP	ENSG00000136449	117.954	183.694	52.2129	0.284238	-1.81483	3.15513e-11	3.82904e-10
TEX2	ENSG00000136478	1225.07	667.628	1782.52	2.66992	1.4168	3.39693e-23	8.88269e-22
TANK	ENSG00000136560	735.164	372.921	1097.41	2.94274	1.55716	4.75808e-24	1.30048e-22
SKIL	ENSG00000136603	219.249	100.602	337.897	3.35875	1.74792	1.43754e-11	1.78658e-10
CBWD2	ENSG00000136682	366.515	211.693	521.338	2.46271	1.30025	3.13254e-13	4.41259e-12
IL1RN	ENSG00000136689	603.931	299.334	908.527	3.03516	1.60177	1.15679e-16	2.07915e-15
DNAJC1	ENSG00000136770	3138.81	4319.12	1958.51	0.453451	-1.14098	2.20169e-09	2.24824e-08
LRRC8A	ENSG00000136802	1410.77	667.468	2154.08	3.22724	1.6903	1.02198e-32	3.92722e-31
TXN	ENSG00000136810	3091.13	2033.95	4148.31	2.03954	1.02824	2.24241e-14	3.4255e-13
TOR1B	ENSG00000136816	1105.98	638.723	1573.24	2.46311	1.30048	4.00602e-19	8.42064e-18
KLF4	ENSG00000136826	328.218	128.19	528.245	4.12079	2.04292	1.44548e-26	4.47641e-25
TOR1A	ENSG00000136827	2438.41	1348.4	3528.43	2.61676	1.38778	8.51004e-25	2.41427e-23
FAM129B	ENSG00000136830	6120.05	596.435	11643.7	19.5221	4.28704	5.11062e-194	5.00453e-191
TMOD1	ENSG00000136842	223.715	368.466	78.9646	0.214306	-2.22225	4.26184e-19	8.93194e-18
DAB2IP	ENSG00000136848	328.498	550.101	106.895	0.194318	-2.36351	4.38703e-07	3.45105e-06
SLC31A2	ENSG00000136867	13.5487	2.39519	24.7022	10.3133	3.36643	6.3389e-05	0.00036344
GARNL3	ENSG00000136895	37.8397	59.222	16.4573	0.277892	-1.8474	2.11574e-05	0.000132137
GABBR2	ENSG00000136928	22.289	9.58148	34.9966	3.65253	1.86889	0.0017918	0.00780062
ANP32B	ENSG00000136938	6595.68	9482.49	3708.87	0.391128	-1.35429	8.0344e-26	2.40676e-24
CTSV	ENSG00000136943	26.6819	39.068	14.2957	0.36592	-1.4504	0.00674334	0.0258466
LMX1B	ENSG00000136944	95.0945	129.843	60.3457	0.464758	-1.10545	0.000667385	0.00317727
ENPP2	ENSG00000136960	4.99707	9.99413	0	0	#NAME?	0.00238084	0.0101002
DSCC1	ENSG00000136982	232.995	324.356	141.634	0.436664	-1.1954	1.67198e-08	1.56393e-07
MYC	ENSG00000136997	5689.8	8759.08	2620.53	0.299179	-1.74092	2.68221e-41	1.39761e-39
NOV	ENSG00000136999	54.1363	0.991088	107.281	108.246	6.75817	2.46088e-28	8.07908e-27
POLR1E	ENSG00000137054	1206.59	1680.77	732.416	0.435763	-1.19839	7.11038e-17	1.29936e-15
TLN1	ENSG00000137076	28018.4	10953.2	45083.6	4.11601	2.04125	3.29399e-58	2.80909e-56
CCL21	ENSG00000137077	15.9031	0.908557	30.8977	34.0074	5.08778	0.000129047	0.000698432
SIT1	ENSG00000137078	66.3	14.041	118.559	8.44377	3.07789	4.77446e-16	8.27748e-15
DNAJB5	ENSG00000137094	68.7457	16.189	121.302	7.49291	2.90553	2.38236e-15	3.94716e-14
CD72	ENSG00000137101	98.2324	65.3343	131.13	2.00707	1.00509	0.000270823	0.00138699
TMEM8B	ENSG00000137103	98.4688	134.221	62.7169	0.467267	-1.09768	9.08088e-05	0.000505545
IGFBPL1	ENSG00000137142	119.556	166.599	72.5124	0.435252	-1.20008	8.69748e-05	0.000486299
PIM1	ENSG00000137193	1916.84	233.585	3600.1	15.4124	3.94602	5.82606e-144	2.58513e-141
GMPR	ENSG00000137198	65.0202	14.2068	115.834	8.15339	3.0274	1.23986e-15	2.08341e-14
TFAP2A	ENSG00000137203	140.639	76.1534	205.125	2.69358	1.42952	4.24425e-09	4.22165e-08
TMEM63B	ENSG00000137216	1090.28	603.125	1577.44	2.61544	1.38705	3.63921e-21	8.63378e-20
HCRTR2	ENSG00000137252	31.4308	0	62.8616	Inf	Inf	6.53877e-19	1.35243e-17
TUBB2A	ENSG00000137267	22.9663	10.2421	35.6906	3.4847	1.80103	0.00167969	0.00737597
FOXF2	ENSG00000137273	41.3598	67.7299	14.9897	0.221316	-2.17582	1.246e-06	9.24914e-06
RIPK1	ENSG00000137275	338.963	223.756	454.171	2.02976	1.02131	1.74907e-08	1.63227e-07
IER3	ENSG00000137331	182.099	4.12977	360.069	87.1885	6.44607	1.2358e-75	1.64762e-73
PGBD1	ENSG00000137338	39.949	54.6789	25.2191	0.461222	-1.11647	0.00892106	0.0331858
RNF144B	ENSG00000137393	15.2992	25.9355	4.66285	0.179786	-2.47564	0.00053431	0.00258754
NRM	ENSG00000137404	365.622	569.345	161.898	0.284358	-1.81422	2.98612e-07	2.39954e-06
TLR2	ENSG00000137462	940.805	530.514	1351.1	2.54677	1.34867	5.66682e-20	1.26118e-18
MYO7A	ENSG00000137474	49.9987	15.6109	84.3865	5.40561	2.43446	1.86061e-09	1.9151e-08
ARRB1	ENSG00000137486	1612.93	988.357	2237.5	2.26386	1.17878	3.81262e-17	7.09043e-16
SLCO2B1	ENSG00000137491	91.3288	0.413013	182.245	441.256	8.78547	4.97856e-48	3.13484e-46
RAB30	ENSG00000137502	15.6246	24.779	6.47014	0.261114	-1.93725	0.00602473	0.023357
TTPA	ENSG00000137561	7.32982	12.8849	1.77478	0.137741	-2.85997	0.0110185	0.0400709
SDCBP	ENSG00000137575	4324.79	2880.13	5769.45	2.00319	1.0023	5.61189e-15	8.99359e-14
DDX60	ENSG00000137628	288.672	153.297	424.047	2.76617	1.46789	7.31142e-15	1.1593e-13
SORL1	ENSG00000137642	400.006	233.17	566.842	2.43103	1.28157	1.43127e-13	2.06635e-12
MMP7	ENSG00000137673	31.59	0.495544	62.6844	126.496	6.98295	1.05582e-17	2.03829e-16
ARHGAP20	ENSG00000137727	17.4301	8.67256	26.1877	3.01961	1.59436	0.00880647	0.0327982
MMP13	ENSG00000137745	7.59969	0	15.1994	Inf	Inf	2.87471e-05	0.000175826
CASP5	ENSG00000137757	5.75675	0.413013	11.1005	26.8768	4.74829	0.0129897	0.0463128
MAP2K5	ENSG00000137764	775.499	1098.46	452.537	0.411974	-1.27937	2.27598e-11	2.79435e-10
SQRDL	ENSG00000137767	1059.75	438.591	1680.91	3.83251	1.93829	3.07884e-30	1.09155e-28
THBS1	ENSG00000137801	49.7389	18.254	81.2237	4.44963	2.15369	7.84585e-08	6.80741e-07
MAPKBP1	ENSG00000137802	407.916	210.622	605.211	2.87344	1.52278	4.3205e-18	8.53224e-17
NUSAP1	ENSG00000137804	1538.7	2133.63	943.784	0.442338	-1.17678	5.6724e-14	8.3724e-13
KIF23	ENSG00000137807	579.712	818.939	340.484	0.415763	-1.26617	3.56702e-06	2.49868e-05
ITGA11	ENSG00000137809	365.521	112.663	618.379	5.48873	2.45647	3.81084e-38	1.82805e-36
CASC5	ENSG00000137812	534.01	749.802	318.218	0.424403	-1.23649	0.00348586	0.0142639
PAQR5	ENSG00000137819	46.3168	3.5517	89.0818	25.0815	4.64855	2.86413e-19	6.08345e-18
ADAM10	ENSG00000137845	3537.48	1318.4	5756.56	4.36632	2.12642	3.07294e-58	2.62847e-56
CYP19A1	ENSG00000137869	1102.14	63.2693	2141	33.8395	5.08064	8.03455e-172	5.565e-169
SEMA6D	ENSG00000137872	4.76453	0.413013	9.11605	22.072	4.46415	0.0114607	0.0414549
SPTBN5	ENSG00000137877	96.772	29.2389	164.305	5.6194	2.49042	2.09751e-11	2.58193e-10
BCAR3	ENSG00000137936	121.781	57.7357	185.827	3.21857	1.68642	3.18809e-10	3.55319e-09
TTLL7	ENSG00000137941	28.9807	50.1357	7.8256	0.156088	-2.67957	1.51824e-06	1.11179e-05
IFI44L	ENSG00000137959	103.32	18.6667	187.974	10.07	3.33199	4.12814e-26	1.25381e-24
IFI44	ENSG00000137965	189.627	25.0266	354.227	14.154	3.82314	2.81772e-48	1.78213e-46
IFT172	ENSG00000138002	362.367	501.28	223.455	0.445768	-1.16564	1.31969e-10	1.51974e-09
CGREF1	ENSG00000138028	206.343	331.462	81.2237	0.245047	-2.02887	1.11489e-19	2.42425e-18
KHK	ENSG00000138030	53.5441	88.791	18.2971	0.206069	-2.2788	9.22729e-09	8.85558e-08
ADCY3	ENSG00000138031	1364.21	816.555	1911.87	2.34139	1.22737	2.54112e-18	5.07118e-17
SIX3	ENSG00000138083	15.423	26.1831	4.66285	0.178086	-2.48935	0.000515201	0.0025014
CENPO	ENSG00000138092	389.009	524.988	253.029	0.481972	-1.05298	8.54932e-09	8.25234e-08
TRIM54	ENSG00000138100	10.3265	3.46917	17.1838	4.95329	2.30839	0.0102774	0.0376639
DTNB	ENSG00000138101	152.813	208.476	97.1496	0.466	-1.1016	4.13108e-06	2.86762e-05
ACTR1A	ENSG00000138107	2393.68	1451.23	3336.13	2.29882	1.20089	3.63158e-19	7.66194e-18
MYOF	ENSG00000138119	853.953	370.116	1337.79	3.61451	1.8538	6.07295e-34	2.4532e-32
LOXL4	ENSG00000138131	33.8817	3.30411	64.4592	19.5088	4.28605	3.54433e-13	4.96556e-12
ATAD1	ENSG00000138138	851.018	548.19	1153.85	2.10483	1.0737	4.67163e-13	6.48412e-12
KIF11	ENSG00000138160	609.297	828.354	390.24	0.471103	-1.08589	0.000206989	0.00108132
TACC2	ENSG00000138162	597.6	189.311	1005.89	5.31343	2.40964	1.02379e-46	6.18588e-45
DUSP5	ENSG00000138166	384.067	105.972	662.163	6.24846	2.6435	2.71112e-43	1.49206e-41
CALHM2	ENSG00000138172	625.076	132.238	1117.91	8.45381	3.0796	7.98306e-70	9.29111e-68
CEP55	ENSG00000138180	334.045	492.766	175.323	0.355793	-1.49089	7.95236e-06	5.29747e-05
RBP4	ENSG00000138207	13.2721	3.5517	22.9925	6.47366	2.69458	0.000720273	0.00341246
ZNF365	ENSG00000138311	6.14501	0.495544	11.7945	23.801	4.57295	0.00208042	0.00893928
ADAMTS14	ENSG00000138316	40.9785	12.8023	69.1546	5.40172	2.43342	3.95091e-08	3.54832e-07
TET1	ENSG00000138336	35.1586	63.847	6.47014	0.101338	-3.30275	4.27625e-10	4.71234e-09
DNA2	ENSG00000138346	300.99	434.87	167.11	0.384276	-1.37978	7.34842e-13	1.00472e-11
CARF	ENSG00000138380	166.446	225.9	106.992	0.473626	-1.07818	3.25064e-05	0.000196952
CDK15	ENSG00000138395	21.1364	0	42.2728	Inf	Inf	8.68008e-09	8.36717e-08
SSFA2	ENSG00000138434	2250.08	1376.38	3123.78	2.26956	1.18241	1.69003e-19	3.64416e-18
FAM117B	ENSG00000138439	129.331	188.651	70.0111	0.371114	-1.43007	7.27358e-08	6.3244e-07
ITGAV	ENSG00000138448	348.02	189.641	506.398	2.6703	1.417	6.09781e-15	9.73935e-14
SLC40A1	ENSG00000138449	123.932	209.463	38.4015	0.183333	-2.44746	2.55929e-14	3.88448e-13
SENP7	ENSG00000138468	105.629	152.719	58.5384	0.383308	-1.38342	0.0020791	0.00893496
COX17	ENSG00000138495	771.308	457.42	1085.2	2.37243	1.24637	1.36349e-16	2.44293e-15
PARP9	ENSG00000138496	882.263	306.432	1458.09	4.75829	2.25044	1.72628e-48	1.10661e-46
GLCE	ENSG00000138604	174.235	114.478	233.991	2.04398	1.03138	2.79446e-06	1.98393e-05
SEMA7A	ENSG00000138623	1574.52	156.026	2993.02	19.1829	4.26175	2.15434e-154	1.19959e-151
HERC6	ENSG00000138642	380.494	97.0506	663.938	6.84115	2.77424	5.05147e-47	3.07836e-45
C4orf21	ENSG00000138658	172.979	262.49	83.4682	0.317986	-1.65296	2.12217e-06	1.52996e-05
RASGEF1B	ENSG00000138670	112.53	3.22122	221.839	68.8681	6.10576	7.67106e-50	5.17441e-48
AGPAT9	ENSG00000138678	110.022	10.1596	209.885	20.6589	4.36869	2.23691e-37	1.03123e-35
MMRN1	ENSG00000138722	6.91881	0.413013	13.4246	32.504	5.02255	0.000481776	0.00235166
PDE5A	ENSG00000138735	26.7653	37.9118	15.6187	0.411974	-1.27937	0.0137173	0.0486019
PRDM5	ENSG00000138738	43.4531	62.5258	24.3805	0.389926	-1.35873	0.00141805	0.00631384
NAAA	ENSG00000138744	444.136	624.269	264.003	0.422899	-1.24161	1.92991e-11	2.38285e-10
BMP2K	ENSG00000138756	531.317	260.591	802.044	3.07778	1.62189	4.36534e-23	1.13731e-21
SCARB2	ENSG00000138760	2475.37	1216.9	3733.84	3.06832	1.61745	6.26386e-32	2.35293e-30
ANXA3	ENSG00000138772	87.229	139.01	35.4484	0.255007	-1.97139	2.09847e-10	2.37799e-09
PAPSS1	ENSG00000138801	985.753	203.766	1767.74	8.67533	3.11692	6.56377e-85	1.09646e-82
KIAA1644	ENSG00000138944	87.0232	128.853	45.1934	0.350736	-1.51154	0.00358193	0.0146065
B4GALNT3	ENSG00000139044	143.763	80.3668	207.16	2.57768	1.36607	1.20409e-08	1.14207e-07
GABARAPL1	ENSG00000139112	122.77	46.997	198.543	4.22458	2.07881	3.77393e-15	6.14871e-14
KIF21A	ENSG00000139116	48.602	71.7753	25.4287	0.354282	-1.49703	0.00462373	0.0184055
FGD4	ENSG00000139132	25.2078	4.54279	45.8728	10.0979	3.33599	1.08313e-06	8.12217e-06
TMEM117	ENSG00000139173	81.6184	51.2926	111.944	2.18246	1.12596	0.000279173	0.00142692
CLSTN3	ENSG00000139182	469.726	303.296	636.155	2.09748	1.06865	2.4279e-10	2.73275e-09
TAPBPL	ENSG00000139192	334.277	180.308	488.246	2.70784	1.43714	8.97294e-15	1.41406e-13
PPFIA2	ENSG00000139220	65.4216	0.826027	130.017	157.401	7.2983	1.48601e-34	6.13369e-33
INHBE	ENSG00000139269	491.871	902.21	81.5309	0.090368	-3.46804	5.96062e-29	2.02476e-27
GLIPR1	ENSG00000139278	561.929	65.4994	1058.36	16.1583	4.0142	1.74054e-97	3.58172e-95
PHLDA1	ENSG00000139289	2035.92	45.5933	4026.24	88.3077	6.46447	2.20162e-202	2.60507e-199
DUSP6	ENSG00000139318	4261.98	656.395	7867.56	11.986	3.58328	6.97552e-142	2.95658e-139
GAS2L3	ENSG00000139354	205.489	135.458	275.52	2.03398	1.02431	2.58189e-06	1.83807e-05
GLTP	ENSG00000139433	349.226	221.278	477.175	2.15645	1.10866	2.87521e-09	2.89642e-08
FAM222A	ENSG00000139438	171.989	71.199	272.779	3.83122	1.93781	1.9891e-16	3.53262e-15
FOXN4	ENSG00000139445	5.14045	9.82907	0.451822	0.0459679	-4.44323	0.00986095	0.0362939
GPR84	ENSG00000139572	375.727	14.5369	736.916	50.6927	5.66371	1.88807e-113	5.01097e-111
SMARCC2	ENSG00000139613	3005.46	4117.95	1892.96	0.459685	-1.12128	7.85333e-18	1.52753e-16
ITGB7	ENSG00000139626	5131.88	156.44	10107.3	64.6084	6.01365	1.97049e-300	7.994e-297
GALNT6	ENSG00000139629	363.589	228.876	498.301	2.17716	1.12245	2.31324e-10	2.61095e-09
CSAD	ENSG00000139631	145.248	198.396	92.0999	0.464222	-1.10711	1.21555e-05	7.85418e-05
LMBR1L	ENSG00000139636	203.602	117.37	289.833	2.4694	1.30416	1.60882e-09	1.66559e-08
HNRNPA1L2	ENSG00000139675	70.639	97.1328	44.1452	0.454483	-1.1377	0.000488226	0.0023806
LPAR6	ENSG00000139679	88.288	4.54279	172.033	37.8695	5.24297	1.97124e-37	9.11716e-36
RB1	ENSG00000139687	1987.03	1187.4	2786.65	2.34684	1.23072	4.275e-20	9.54414e-19
VPS37B	ENSG00000139722	1080.59	630.052	1531.13	2.43016	1.28105	3.48055e-18	6.89747e-17
DIAPH3	ENSG00000139734	294.885	426.774	162.997	0.381928	-1.38863	1.42144e-10	1.63293e-09
SLAIN1	ENSG00000139737	238.474	367.972	108.977	0.296155	-1.75558	3.27011e-09	3.28375e-08
ZIC5	ENSG00000139800	167.99	225.406	110.574	0.490555	-1.02751	1.20294e-05	7.77981e-05
GRTP1	ENSG00000139835	43.5928	67.5655	19.6201	0.290386	-1.78396	0.0106678	0.0389237
CDH24	ENSG00000139880	813.989	427.027	1200.95	2.81236	1.49178	7.1253e-23	1.83449e-21
TSSK4	ENSG00000139908	58.3222	80.614	36.0303	0.446948	-1.16182	0.00212173	0.00910304
PELI2	ENSG00000139946	233.772	371.023	96.5206	0.260147	-1.9426	4.05236e-19	8.51175e-18
RTN1	ENSG00000139970	189.295	19.9883	358.601	17.9406	4.16515	1.35197e-53	1.01302e-51
STON2	ENSG00000140022	47.1625	20.1533	74.1717	3.68037	1.87985	5.58252e-06	3.80904e-05
GPR65	ENSG00000140030	22.4251	6.02942	38.8208	6.43857	2.68674	8.00731e-06	5.3303e-05
PTGR2	ENSG00000140043	77.8248	105.147	50.5032	0.480312	-1.05796	0.000833739	0.00389288
SLC24A4	ENSG00000140090	68.4343	112.166	24.7022	0.220229	-2.18293	2.14084e-10	2.42407e-09
HERC2P2	ENSG00000140181	1405.41	1910.52	900.295	0.47123	-1.0855	0.00390405	0.0158107
SLC12A6	ENSG00000140199	1474.92	337.572	2612.28	7.73842	2.95204	4.11627e-87	6.95796e-85
SORD	ENSG00000140263	709.87	961.427	458.314	0.476701	-1.06884	2.2095e-12	2.91703e-11
SERF2	ENSG00000140264	4703.44	3115.05	6291.83	2.01981	1.01422	8.30949e-16	1.41386e-14
ANP32A	ENSG00000140350	3941.41	5274.27	2608.54	0.494579	-1.01573	1.97453e-14	3.03259e-13
BCL2A1	ENSG00000140379	166.096	2.31266	329.879	142.641	7.15624	4.38371e-74	5.60759e-72
MESDC1	ENSG00000140406	1127.22	648.883	1605.56	2.47435	1.30705	2.42309e-19	5.18154e-18
IGF1R	ENSG00000140443	61.569	89.2873	33.8508	0.379122	-1.39927	3.80808e-05	0.000227907
PIF1	ENSG00000140451	169.568	265.301	73.8353	0.278307	-1.84525	3.94079e-14	5.88693e-13
CYP11A1	ENSG00000140459	3.77546	0	7.55093	Inf	Inf	0.0093163	0.0345069
PCSK6	ENSG00000140479	918.642	225.573	1611.71	7.14496	2.83693	7.86152e-71	9.41989e-69
SCAMP2	ENSG00000140497	4580.5	2550.36	6610.63	2.59204	1.37409	1.11575e-23	2.98916e-22
RHCG	ENSG00000140519	16.396	31.469	1.32295	0.0420399	-4.5721	1.60503e-07	1.33627e-06
FANCI	ENSG00000140525	1257.47	1851.15	663.8	0.358588	-1.4796	3.29635e-24	9.06193e-23
ABHD2	ENSG00000140526	3374.54	1322.46	5426.62	4.10344	2.03683	1.80128e-52	1.31498e-50
TICRR	ENSG00000140534	541.16	800.117	282.203	0.352702	-1.50348	1.57483e-19	3.40092e-18
MFGE8	ENSG00000140545	329.43	70.2072	588.652	8.3845	3.06772	1.6208e-50	1.12537e-48
FURIN	ENSG00000140564	6661.18	2842.01	10480.4	3.68765	1.8827	1.54328e-47	9.63209e-46
IQGAP1	ENSG00000140575	6379.61	4030.7	8728.53	2.16551	1.11471	2.899e-19	6.15289e-18
ITGAX	ENSG00000140678	5370.6	769.8	9971.41	12.9532	3.69524	2.68459e-153	1.4661e-150
TGFB1I1	ENSG00000140682	313.277	115.058	511.495	4.44554	2.15236	1.02135e-27	3.26259e-26
IGSF6	ENSG00000140749	50.8809	6.11231	95.6495	15.6487	3.96797	5.80925e-18	1.1393e-16
ZFHX3	ENSG00000140836	95.1534	139.175	51.1321	0.367395	-1.44459	1.04495e-06	7.84828e-06
CPNE2	ENSG00000140848	6309.98	2348.32	10271.6	4.37404	2.12897	3.29478e-59	2.87009e-57
NLRC5	ENSG00000140853	1408.57	755.097	2062.04	2.73083	1.44934	3.23424e-25	9.40082e-24
KIFC3	ENSG00000140859	2617.04	1009.83	4224.25	4.18313	2.06458	8.3969e-53	6.1776e-51
NUDT7	ENSG00000140876	213.226	307.344	119.108	0.387541	-1.36758	9.27074e-11	1.08297e-09
CMTM3	ENSG00000140931	5302.94	1716.45	8889.43	5.17895	2.37266	3.8403e-71	4.64072e-69
CDH11	ENSG00000140937	73.8496	121.996	25.7034	0.210691	-2.2468	7.4917e-11	8.80585e-10
MAP1LC3B	ENSG00000140941	1592.01	803.26	2380.75	2.96386	1.56748	8.12314e-29	2.72673e-27
OSGIN1	ENSG00000140961	85.4795	43.3635	127.595	2.94246	1.55702	3.97073e-07	3.14272e-06
TOM1L1	ENSG00000141198	80.2733	109.028	51.5189	0.472531	-1.08152	0.000391557	0.001946
ARSG	ENSG00000141337	70.988	100.025	41.9511	0.419406	-1.25358	0.00011919	0.000648795
C17orf64	ENSG00000141371	32.0565	50.3015	13.8114	0.274572	-1.86474	0.000101341	0.000559682
TAF4B	ENSG00000141384	297.644	414.223	181.066	0.437123	-1.19389	2.43738e-10	2.74234e-09
IMPA2	ENSG00000141401	480.666	828.283	133.05	0.160633	-2.63816	1.32798e-47	8.30658e-46
GALNT1	ENSG00000141429	2573.27	1567.68	3578.86	2.28291	1.19087	1.3072e-19	2.8294e-18
OSBPL1A	ENSG00000141447	1193.77	1694.47	693.078	0.409025	-1.28974	1.8397e-19	3.95486e-18
GATA6	ENSG00000141448	37.0891	60.5439	13.6343	0.225196	-2.15075	4.278e-06	2.96237e-05
C18orf8	ENSG00000141452	2051.42	1009.5	3093.33	3.06421	1.61552	8.91372e-32	3.31758e-30
NPC1	ENSG00000141458	18698.7	1997.77	35399.5	17.7195	4.14726	1.4894e-195	1.51057e-192
SLC14A1	ENSG00000141469	41.2555	79.6229	2.88808	0.0362719	-4.785	5.60088e-17	1.03148e-15
ARRB2	ENSG00000141480	2315.02	1005.38	3624.65	3.60526	1.8501	1.63077e-41	8.56018e-40
ZMYND15	ENSG00000141497	9.68826	1.32157	18.0549	13.6617	3.77207	0.000353434	0.00177141
SAT2	ENSG00000141504	221.154	135.128	307.18	2.27325	1.18476	8.98367e-09	8.63929e-08
PIK3R5	ENSG00000141506	1588.87	1014.54	2163.21	2.1322	1.09234	3.79204e-15	6.17114e-14
TMC6	ENSG00000141524	2947	1803.01	4090.98	2.26897	1.18203	2.77169e-19	5.90476e-18
SLC16A3	ENSG00000141526	6389.27	3042.05	9736.5	3.20064	1.67836	1.05091e-39	5.24494e-38
RPTOR	ENSG00000141564	2821.28	1635.02	4007.54	2.45107	1.29341	2.61452e-22	6.5301e-21
RNF157	ENSG00000141576	117.719	186.257	49.1802	0.264045	-1.92114	4.74011e-12	6.11307e-11
AZI1	ENSG00000141577	562.051	763.694	360.408	0.471927	-1.08336	2.23874e-08	2.06548e-07
CBX4	ENSG00000141582	2621.55	3659.47	1583.62	0.432746	-1.20841	3.39599e-08	3.07524e-07
RNF165	ENSG00000141622	77.2257	119.599	34.852	0.291406	-1.7789	7.14745e-08	6.22045e-07
TNFRSF11A	ENSG00000141655	74.349	38.7382	109.96	2.83854	1.50515	4.21937e-06	2.92462e-05
FBXO15	ENSG00000141665	202.457	118.858	286.056	2.40669	1.26705	1.12756e-06	8.43972e-06
LEPREL4	ENSG00000141696	235.617	319.404	151.831	0.475359	-1.07291	1.62498e-07	1.35128e-06
ERBB2	ENSG00000141736	149.634	223.755	75.5126	0.337479	-1.56713	2.784e-10	3.11158e-09
MIEN1	ENSG00000141741	611.422	376.889	845.955	2.24457	1.16644	5.93844e-13	8.17846e-12
FKBP10	ENSG00000141756	15.8299	27.1742	4.48571	0.165072	-2.59883	0.000667986	0.0031796
hsa-mir-1199	ENSG00000141854	28.5268	43.694	13.3596	0.305753	-1.70956	0.00057206	0.00275719
SAMD1	ENSG00000141858	1097.47	1622.63	572.311	0.352706	-1.50346	9.54292e-07	7.20553e-06
CIB3	ENSG00000141977	152.824	70.7853	234.862	3.31795	1.73029	6.80755e-13	9.33466e-12
IFITM3	ENSG00000142089	4308.49	1447.02	7169.97	4.95498	2.30888	2.11538e-66	2.23318e-64
HUNK	ENSG00000142149	358.392	622.783	94.0014	0.150938	-2.72798	3.60501e-25	1.04464e-23
IFNAR1	ENSG00000142166	1080.65	689.93	1471.37	2.13264	1.09264	2.7674e-14	4.18692e-13
SIK1	ENSG00000142178	127.721	80.7805	174.661	2.16217	1.11248	1.92365e-05	0.000121045
TRPM2	ENSG00000142185	2936.45	1722.07	4150.84	2.41038	1.26926	4.10144e-22	1.01634e-20
EMP3	ENSG00000142227	4379.45	2643.27	6115.63	2.31366	1.21018	7.49092e-21	1.75084e-19
LMTK3	ENSG00000142235	77.357	110.019	44.6945	0.406242	-1.29959	5.14753e-05	0.00030041
MYO1F	ENSG00000142347	12162.9	6429.62	17896.1	2.78338	1.47684	1.42772e-31	5.27922e-30
SIGLEC10	ENSG00000142512	71.4589	119.022	23.8961	0.200771	-2.31638	4.00887e-11	4.82594e-10
FAM71E1	ENSG00000142530	59.9695	84.9099	35.0291	0.412544	-1.27738	0.000256674	0.00132096
SLC2A5	ENSG00000142583	1269.16	2200.72	337.608	0.153408	-2.70456	4.57071e-29	1.56008e-27
EFHD2	ENSG00000142634	5114.98	2562.74	7667.21	2.9918	1.58101	1.77796e-34	7.30686e-33
SH3BGRL3	ENSG00000142669	20126.7	5109.31	35144	6.87843	2.78208	6.09732e-100	1.32177e-97
DMRTA2	ENSG00000142700	2495.63	3357.15	1634.11	0.486756	-1.03873	4.54896e-15	7.33986e-14
PLK4	ENSG00000142731	423.804	634.914	212.694	0.334996	-1.57778	1.02029e-05	6.68072e-05
SYTL1	ENSG00000142765	3124.92	5134.14	1115.69	0.217309	-2.20218	4.73026e-59	4.09543e-57
HSPG2	ENSG00000142798	3050.59	1963.42	4137.76	2.10742	1.07548	2.74159e-16	4.8178e-15
ITGB3BP	ENSG00000142856	198.472	302.715	94.229	0.31128	-1.68372	9.08847e-14	1.32765e-12
CYR61	ENSG00000142871	35.5254	52.3669	18.6839	0.356788	-1.48686	0.000548133	0.00265087
KIF2C	ENSG00000142945	2772.57	3820.52	1724.62	0.451411	-1.14749	1.66245e-18	3.36976e-17
MOB3C	ENSG00000142961	573.439	346.742	800.136	2.30758	1.20638	1.14982e-13	1.67192e-12
LMO4	ENSG00000143013	4248.5	1936.32	6560.69	3.38823	1.76053	1.31378e-41	6.93469e-40
SYPL2	ENSG00000143028	29.0347	13.1328	44.9367	3.42171	1.77472	0.000276597	0.00141502
IGSF3	ENSG00000143061	172.54	288.512	56.5686	0.19607	-2.35056	1.21166e-22	3.08045e-21
ZNF697	ENSG00000143067	565.882	178.987	952.776	5.32316	2.41228	5.90533e-46	3.45772e-44
CTTNBP2NL	ENSG00000143079	273.157	124.638	421.676	3.38321	1.75839	3.11878e-19	6.60949e-18
CD53	ENSG00000143119	5634.79	262.908	11006.7	41.8652	5.38768	1.24677e-264	2.95049e-261
ITGA10	ENSG00000143127	19.8574	30.8084	8.90639	0.289089	-1.79041	0.00317427	0.0131174
ATP1B1	ENSG00000143153	176.106	95.6476	256.564	2.68239	1.42352	3.22132e-10	3.58601e-09
GPA33	ENSG00000143167	278.463	507.311	49.6141	0.0977982	-3.35405	8.64337e-52	6.1672e-50
POU2F1	ENSG00000143190	918.131	1320.64	515.627	0.390438	-1.35683	8.81537e-20	1.93461e-18
ILDR2	ENSG00000143195	11.1654	19.4102	2.92059	0.150467	-2.73248	0.00346508	0.0141953
MGST3	ENSG00000143198	1918.73	1177.92	2659.54	2.25783	1.17493	1.13969e-11	1.42514e-10
ABL2	ENSG00000143322	653.132	343.436	962.828	2.80351	1.48724	2.58559e-21	6.19626e-20
RGS16	ENSG00000143333	961.966	378.13	1545.8	4.08802	2.0314	5.11485e-41	2.63615e-39
FAM163A	ENSG00000143340	9.08399	15.9414	2.2266	0.139674	-2.83986	0.00426936	0.0171196
HMCN1	ENSG00000143341	15.5163	0.908557	30.1241	33.156	5.0512	6.52787e-08	5.71979e-07
RGL1	ENSG00000143344	25.111	14.2893	35.9328	2.51466	1.33036	0.0126729	0.0453197
ECM1	ENSG00000143369	3893.12	1177.18	6609.05	5.61431	2.48911	5.79299e-75	7.58107e-73
MCL1	ENSG00000143384	5951.31	2878.73	9023.89	3.13467	1.64831	9.02203e-38	4.26302e-36
PIP5K1A	ENSG00000143398	82.3294	126.21	38.4486	0.30464	-1.71482	0.00732814	0.0278103
POGZ	ENSG00000143442	1521.99	2051.38	992.598	0.483869	-1.04731	4.46221e-14	6.64837e-13
IKBKE	ENSG00000143466	832.461	431.238	1233.69	2.8608	1.51642	1.40697e-23	3.74112e-22
DTL	ENSG00000143476	917.877	1268.19	567.565	0.447539	-1.15991	3.61504e-15	5.90339e-14
DYRK3	ENSG00000143479	38.1956	17.6756	58.7156	3.32184	1.73198	6.83084e-05	0.00038882
VASH2	ENSG00000143494	10.0751	17.9236	2.2266	0.124227	-3.00894	0.00174138	0.00761851
DUSP10	ENSG00000143507	772.127	426.862	1117.39	2.61769	1.3883	8.27312e-19	1.70741e-17
RAB13	ENSG00000143545	2150.3	831.909	3468.7	4.16957	2.0599	1.75043e-32	6.68128e-31
S100A8	ENSG00000143546	16.8087	32.956	0.661477	0.0200715	-5.63871	1.13683e-08	1.08233e-07
SLC27A3	ENSG00000143554	460.65	306.767	614.533	2.00326	1.00235	6.7072e-09	6.56118e-08
SLC39A1	ENSG00000143570	2434.87	1567.04	3302.7	2.10761	1.07561	8.9999e-16	1.52676e-14
CREB3L4	ENSG00000143578	274.94	393.161	156.718	0.398611	-1.32695	6.27371e-12	8.0325e-11
RIT1	ENSG00000143622	440.486	181.713	699.259	3.84816	1.94417	2.93715e-28	9.62044e-27
GALNT2	ENSG00000143641	1189.65	721.568	1657.73	2.2974	1.2	6.39982e-17	1.17329e-15
MLK4	ENSG00000143674	265.4	408.852	121.949	0.298273	-1.7453	2.65094e-17	4.97564e-16
DEGS1	ENSG00000143753	2948.93	1792.6	4105.25	2.2901	1.19541	4.06286e-19	8.52751e-18
CNIH4	ENSG00000143771	2542.4	1440.4	3644.39	2.53012	1.3392	1.23422e-23	3.29722e-22
ITPKB	ENSG00000143772	1147.35	677.71	1616.99	2.38596	1.25457	3.98954e-18	7.88962e-17
GUK1	ENSG00000143774	5300.46	2970.85	7630.08	2.56831	1.36082	2.23422e-26	6.85176e-25
CNIH3	ENSG00000143786	392.306	140.085	644.527	4.60096	2.20193	3.54751e-32	1.34682e-30
MBOAT2	ENSG00000143797	140.428	208.474	72.3823	0.347201	-1.52616	1.96038e-09	2.01397e-08
PSEN2	ENSG00000143801	1638.78	269.763	3007.8	11.1498	3.47894	2.38718e-115	6.51839e-113
PLEKHA6	ENSG00000143850	14.1781	23.8704	4.48571	0.187919	-2.41182	0.00248553	0.0105036
ARL8A	ENSG00000143862	1220.65	694.971	1746.33	2.51281	1.3293	1.57953e-20	3.60284e-19
ATP6V1C2	ENSG00000143882	205.382	76.2367	334.528	4.38802	2.13357	9.9641e-22	2.43093e-20
ABHD1	ENSG00000143994	15.745	25.4392	6.05083	0.237854	-2.07185	0.01315	0.0468197
ZNF514	ENSG00000144026	234.187	354.669	113.704	0.320593	-1.64118	1.76069e-14	2.72183e-13
DQX1	ENSG00000144045	11.9691	21.2273	2.71093	0.12771	-2.96906	0.0016079	0.00708364
RALB	ENSG00000144118	2083.91	1164.2	3003.62	2.58	1.36737	1.80027e-24	5.01709e-23
NT5DC4	ENSG00000144130	4.34522	0.413013	8.27742	20.0415	4.32492	0.0135537	0.0480823
SLC20A1	ENSG00000144136	6239.5	1164.78	11314.2	9.71359	3.28	1.5648e-126	5.29015e-124
FAHD2B	ENSG00000144199	202.955	286.365	119.546	0.417459	-1.26029	1.20295e-08	1.14138e-07
AFF3	ENSG00000144218	677.496	1014.37	340.626	0.335801	-1.57432	3.09468e-23	8.12225e-22
CDCA7	ENSG00000144354	712.039	1257.45	166.626	0.132511	-2.91582	1.75373e-66	1.8583e-64
CCDC150	ENSG00000144395	62.1887	99.6101	24.7673	0.248642	-2.00786	0.000108362	0.000594524
METTL21A	ENSG00000144401	467.132	627.49	306.775	0.488892	-1.03241	5.99221e-10	6.48501e-09
SUMF1	ENSG00000144455	470.574	237.714	703.434	2.95916	1.56519	7.67111e-18	1.49516e-16
ACKR3	ENSG00000144476	12.2813	0.908557	23.654	26.0346	4.70236	3.62393e-06	2.53604e-05
TRPM8	ENSG00000144481	34.6848	8.59003	60.7796	7.0756	2.82285	1.33459e-06	9.86204e-06
FANCD2	ENSG00000144554	1046.78	1639.62	453.94	0.276856	-1.85279	6.48151e-36	2.83172e-34
VGLL4	ENSG00000144560	1071.63	562.153	1581.1	2.81257	1.49189	2.31894e-24	6.431e-23
CNTN4	ENSG00000144619	81.4648	111.588	51.3418	0.460102	-1.11997	0.000302138	0.00153435
ACKR2	ENSG00000144648	35.6428	54.1019	17.1838	0.31762	-1.65463	0.00777349	0.0293163
FAM198A	ENSG00000144649	6.46202	12.4722	0.451822	0.0362263	-4.78682	0.00211356	0.00907069
CSRNP1	ENSG00000144655	802.548	373.67	1231.43	3.29549	1.72049	9.25426e-29	3.09909e-27
ITGA9	ENSG00000144668	24.375	34.9386	13.8114	0.395306	-1.33896	0.0111654	0.040557
CAND2	ENSG00000144712	76.6746	135.294	18.0549	0.133449	-2.90564	1.32663e-16	2.37838e-15
PTPRG	ENSG00000144724	616.142	256.131	976.152	3.81114	1.93022	2.17282e-32	8.2824e-31
NFKBIZ	ENSG00000144802	126.01	54.4313	197.589	3.63006	1.85999	2.4198e-12	3.1811e-11
ADPRH	ENSG00000144843	501.756	299.995	703.517	2.3451	1.22965	1.10819e-10	1.28555e-09
BOC	ENSG00000144857	41.3923	3.96471	78.82	19.8804	4.31327	2.74401e-16	4.81908e-15
OSBPL11	ENSG00000144909	204.052	78.5497	329.554	4.19549	2.06884	2.12316e-10	2.40501e-09
KIAA0226	ENSG00000145016	460.564	282.814	638.314	2.25701	1.17441	3.15644e-07	2.52925e-06
AMT	ENSG00000145020	110.64	188.236	33.0447	0.175549	-2.51005	1.10583e-12	1.49326e-11
UCN2	ENSG00000145040	67.4983	1.89965	133.097	70.0641	6.1306	1.49824e-32	5.73409e-31
MANF	ENSG00000145050	1151.82	708.184	1595.46	2.25289	1.17178	3.74551e-16	6.53749e-15
STXBP5L	ENSG00000145087	79.3652	107.953	50.7778	0.470372	-1.08813	0.00875297	0.0326208
EAF2	ENSG00000145088	651.795	961.252	342.339	0.356139	-1.48949	9.4307e-08	8.09348e-07
TM4SF19	ENSG00000145107	48.3538	1.81711	94.8905	52.2204	5.70654	1.61549e-23	4.27955e-22
ATP10D	ENSG00000145246	260.23	137.11	383.35	2.79594	1.48333	1.52615e-13	2.19775e-12
SCD5	ENSG00000145284	91.9033	132.982	50.8249	0.382195	-1.38762	1.41595e-06	1.04145e-05
PLAC8	ENSG00000145287	1851.02	3049.56	652.483	0.213959	-2.22459	3.59115e-52	2.60157e-50
DDIT4L	ENSG00000145358	272.308	8.25955	536.357	64.9378	6.02099	1.32834e-59	1.16787e-57
ANK2	ENSG00000145362	133.904	187.246	80.5622	0.430248	-1.21676	1.50659e-06	1.10354e-05
CCNA2	ENSG00000145386	1132.69	1573.8	691.582	0.439434	-1.18628	1.95302e-16	3.4707e-15
USP53	ENSG00000145390	136.689	44.4368	228.941	5.15207	2.36515	7.36493e-20	1.62509e-18
PDGFC	ENSG00000145431	256.289	163.624	348.954	2.13265	1.09265	2.80428e-08	2.55735e-07
ROPN1L	ENSG00000145491	218.502	86.0668	350.938	4.07751	2.02769	1.41263e-20	3.23515e-19
NDUFS6	ENSG00000145494	2385.81	1572.89	3198.73	2.03367	1.02409	5.01242e-15	8.06474e-14
NKD2	ENSG00000145506	3371.46	5727.54	1015.39	0.177283	-2.49588	3.07481e-31	1.12234e-29
SRD5A1	ENSG00000145545	197.613	69.134	326.091	4.7168	2.23781	4.98018e-23	1.29394e-21
FAM105A	ENSG00000145569	2636.73	3773.17	1500.3	0.397624	-1.33052	2.344e-23	6.18057e-22
SKP2	ENSG00000145604	660.116	952.837	367.395	0.38558	-1.3749	4.0631e-18	8.02951e-17
OSMR	ENSG00000145623	543.625	43.281	1043.97	24.1207	4.5922	2.19219e-113	5.76423e-111
IQGAP2	ENSG00000145703	50.4184	20.4842	80.3526	3.92267	1.97184	5.21512e-07	4.07201e-06
RASA1	ENSG00000145715	966.284	368.707	1563.86	4.24147	2.08456	2.90791e-44	1.62877e-42
MEGF10	ENSG00000145794	43.9451	25.7697	62.1205	2.4106	1.26939	0.000982817	0.00451692
ARHGAP26	ENSG00000145819	1283.26	490.625	2075.9	4.23113	2.08104	2.14834e-46	1.28439e-44
TIMD4	ENSG00000145850	6.15565	0	12.3113	Inf	Inf	0.000198421	0.00104097
N4BP3	ENSG00000145911	57.5768	14.4544	100.699	6.96668	2.80047	5.49439e-13	7.5853e-12
KCNMB1	ENSG00000145936	1307.95	213.597	2402.31	11.2469	3.49146	7.03704e-109	1.69354e-106
GFOD1	ENSG00000145990	288.893	143.802	433.984	3.01793	1.59356	4.70941e-16	8.16969e-15
KLHL3	ENSG00000146021	84.145	127.033	41.2571	0.324775	-1.62249	1.57959e-07	1.3174e-06
PLA2G7	ENSG00000146070	6.69605	0	13.3921	Inf	Inf	0.000117458	0.000639978
TNFRSF21	ENSG00000146072	722.742	198.233	1247.25	6.29183	2.65348	4.59072e-58	3.87998e-56
RASGEF1C	ENSG00000146090	26.8725	6.19484	47.5501	7.67575	2.94031	2.30525e-07	1.88117e-06
PPP1R18	ENSG00000146112	1618.12	663.834	2572.4	3.87507	1.95422	4.24501e-43	2.32722e-41
NFKBIE	ENSG00000146232	1075.45	450.649	1700.26	3.77291	1.91568	5.42933e-38	2.58695e-36
MMS22L	ENSG00000146263	422.308	590.892	253.723	0.42939	-1.21964	2.62615e-09	2.65494e-08
RNF217	ENSG00000146373	163.915	99.1153	228.714	2.30755	1.20636	1.4829e-07	1.24259e-06
RSPO3	ENSG00000146374	7.14472	0.413013	13.8764	33.598	5.0703	0.000348418	0.00174905
ARHGAP18	ENSG00000146376	736.16	166.597	1305.72	7.83765	2.97042	4.28716e-71	5.15876e-69
ABRACL	ENSG00000146386	1830.31	807.545	2853.08	3.53303	1.8209	7.55979e-40	3.79298e-38
AIG1	ENSG00000146416	1609.49	2508.97	710.023	0.282994	-1.82115	3.5222e-38	1.69244e-36
GNA12	ENSG00000146535	2093.06	1298.43	2887.7	2.224	1.15316	1.42955e-17	2.74485e-16
SDK1	ENSG00000146555	407.729	582.887	232.571	0.398998	-1.32555	5.15528e-14	7.63692e-13
CDCA5	ENSG00000146670	1138.4	1623.45	653.361	0.402452	-1.31311	4.80024e-10	5.25915e-09
IGFBP3	ENSG00000146674	945.382	51.8714	1838.89	35.451	5.14775	2.55641e-164	1.5782e-161
AC006014.8	ENSG00000146722	17.1939	27.9177	6.47014	0.231758	-2.10931	0.00188326	0.00816125
STRA8	ENSG00000146857	74.4617	15.776	133.147	8.43989	3.07722	3.01935e-18	6.00059e-17
NCAPG2	ENSG00000146918	1222.99	1645.48	800.49	0.486477	-1.03956	2.4967e-13	3.53976e-12
SHROOM2	ENSG00000146950	85.2569	1.32157	169.192	128.024	7.00027	1.26643e-42	6.85031e-41
SH3KBP1	ENSG00000147010	6446.27	4130.57	8761.97	2.12125	1.08491	3.67065e-18	7.26405e-17
LANCL3	ENSG00000147036	302.587	44.3539	560.82	12.6442	3.66041	2.90531e-62	2.75936e-60
CASK	ENSG00000147044	10.5756	1.32157	19.8297	15.0047	3.90734	0.000136125	0.00073436
MSN	ENSG00000147065	40619.6	21453.3	59786	2.7868	1.47861	6.66997e-32	2.49886e-30
CCNB3	ENSG00000147082	32.6688	48.8152	16.5223	0.338467	-1.56291	0.000958992	0.00441886
CHST7	ENSG00000147119	193.087	98.3729	287.802	2.92562	1.54874	1.83003e-12	2.42846e-11
SNX12	ENSG00000147164	1073.18	647.81	1498.54	2.31325	1.20992	6.08196e-17	1.11645e-15
ITGB1BP2	ENSG00000147166	120.234	16.2715	224.196	13.7784	3.78434	5.65145e-34	2.28618e-32
IL2RG	ENSG00000147168	48.1867	10.4071	85.9662	8.2603	3.04619	3.13971e-09	3.15616e-08
ZNF711	ENSG00000147180	87.166	147.515	26.8167	0.181789	-2.45966	3.93492e-05	0.000234756
CXorf57	ENSG00000147231	318.103	442.633	193.573	0.437321	-1.19324	3.96611e-10	4.39273e-09
FRMPD3	ENSG00000147234	21.9244	42.0416	1.80729	0.0429881	-4.53992	7.56691e-09	7.3717e-08
IGSF1	ENSG00000147255	204.368	43.1163	365.621	8.47987	3.08404	1.03739e-37	4.88555e-36
GPC3	ENSG00000147257	948.586	626.914	1270.26	2.02621	1.01878	2.70862e-11	3.30552e-10
FAM58A	ENSG00000147382	582.887	374.332	791.442	2.11428	1.08017	1.83896e-11	2.27353e-10
CETN2	ENSG00000147400	320.599	189.89	451.309	2.37669	1.24895	1.74097e-07	1.44224e-06
BIN3	ENSG00000147439	876.837	450.401	1303.27	2.89358	1.53286	3.83181e-24	1.05034e-22
SLC25A37	ENSG00000147454	1267.65	1828.03	707.265	0.386901	-1.36997	1.4623e-21	3.53717e-20
STAR	ENSG00000147465	1142.57	1904.77	380.368	0.199693	-2.32415	1.90689e-53	1.42131e-51
TACC1	ENSG00000147526	3011.31	1817.87	4204.75	2.31301	1.20977	1.40608e-20	3.22276e-19
ATP6V0D2	ENSG00000147614	81.8331	0.495544	163.171	329.276	8.36315	1.60887e-15	2.67969e-14
LRP12	ENSG00000147650	338.83	120.921	556.739	4.60415	2.20294	9.11109e-31	3.27515e-29
NDUFB9	ENSG00000147684	4471.27	2789.21	6153.33	2.20612	1.14151	3.61102e-19	7.62423e-18
FAM135B	ENSG00000147724	13.9711	24.118	3.82423	0.158563	-2.65687	0.00148091	0.00656798
ZCCHC7	ENSG00000147905	1327.23	749.644	1904.82	2.54096	1.34538	1.43982e-21	3.48577e-20
CBWD5	ENSG00000147996	125.081	80.6955	169.467	2.10008	1.07044	1.31322e-05	8.46216e-05
CEP78	ENSG00000148019	240.455	323.447	157.463	0.486827	-1.03852	6.29666e-07	4.87095e-06
IDNK	ENSG00000148057	68.9791	97.9591	39.9991	0.408325	-1.29221	0.000160085	0.000853726
AUH	ENSG00000148090	215.267	140.91	289.624	2.05538	1.0394	7.64122e-07	5.84736e-06
UGCG	ENSG00000148154	580.282	220.865	939.699	4.25464	2.08904	2.36709e-35	1.01084e-33
GSN	ENSG00000148180	43434.2	22348	64520.4	2.88707	1.52961	1.74698e-34	7.18996e-33
NR6A1	ENSG00000148200	104.293	148.757	59.8289	0.402191	-1.31405	2.51762e-06	1.79727e-05
ASTN2	ENSG00000148219	36.2919	49.5587	23.025	0.4646	-1.10594	0.013741	0.0486737
WDR31	ENSG00000148225	150.034	201.95	98.1183	0.485855	-1.0414	2.18297e-05	0.000136037
SLC25A25	ENSG00000148339	273.522	137.937	409.108	2.96591	1.56847	6.16896e-13	8.46719e-12
NOTCH1	ENSG00000148400	7568.23	2707.45	12429	4.59066	2.1987	3.05589e-64	3.04496e-62
FAM171A1	ENSG00000148468	67.2232	93.9955	40.451	0.43035	-1.21642	0.000364135	0.00182055
ST8SIA6	ENSG00000148488	20.9727	37.9115	4.03388	0.106403	-3.23239	3.25638e-06	2.29238e-05
PARD3	ENSG00000148498	253.286	420.83	85.7419	0.203745	-2.29516	1.05264e-26	3.27056e-25
HTR7	ENSG00000148680	173.829	40.7204	306.937	7.53769	2.91412	1.75194e-31	6.46123e-30
FRA10AC1	ENSG00000148690	245.153	335.586	154.719	0.461043	-1.11703	0.00552438	0.0215971
TCF7L2	ENSG00000148737	158.829	73.1809	244.477	3.34073	1.74016	5.4926e-13	7.5853e-12
MKI67	ENSG00000148773	4162.49	5562.99	2761.98	0.496493	-1.01016	0.00253847	0.0107034
FUOM	ENSG00000148803	804.128	526.721	1081.54	2.05334	1.03797	3.87788e-12	5.02162e-11
MTG1	ENSG00000148824	48.0922	70.8678	25.3166	0.357237	-1.48505	0.000379313	0.00189077
GSTO1	ENSG00000148834	3479.59	1242.34	5716.83	4.60166	2.20215	7.16747e-61	6.63003e-59
ITPRIP	ENSG00000148841	946.504	258.447	1634.56	6.32457	2.66097	8.63556e-65	8.75831e-63
ADAM12	ENSG00000148848	97.2638	146.526	48.0019	0.3276	-1.60999	4.86656e-08	4.33638e-07
ADM	ENSG00000148926	23.4645	3.79965	43.1294	11.3509	3.50473	4.8704e-08	4.33844e-07
PGAP2	ENSG00000148985	502.814	691.092	314.535	0.455128	-1.13565	2.31293e-07	1.88635e-06
PTPRJ	ENSG00000149177	1664.5	969.933	2359.07	2.4322	1.28226	7.71103e-21	1.79785e-19
SESN3	ENSG00000149212	161.372	259.929	62.8145	0.24166	-2.04895	5.18257e-09	5.11912e-08
ZC3H12C	ENSG00000149289	536.185	129.18	943.19	7.30135	2.86816	1.73354e-59	1.51942e-57
INCENP	ENSG00000149503	1444.79	1944.82	944.756	0.48578	-1.04163	6.98511e-14	1.02512e-12
MS4A3	ENSG00000149516	2073.53	3898.4	248.656	0.0637841	-3.97066	2.23607e-145	1.00793e-142
B3GAT3	ENSG00000149541	1906.25	1176.59	2635.9	2.24028	1.16368	9.60043e-18	1.85717e-16
CCDC15	ENSG00000149548	120.518	192.614	48.4212	0.25139	-1.992	1.28744e-11	1.60354e-10
CHEK1	ENSG00000149554	568.128	829.351	306.905	0.370054	-1.43419	3.24296e-18	6.44011e-17
ESAM	ENSG00000149564	54.355	28.0828	80.6273	2.87106	1.52158	2.7258e-05	0.000167258
TMEM25	ENSG00000149582	27.7881	50.2193	5.35684	0.106669	-3.22879	3.40482e-08	3.08225e-07
JPH2	ENSG00000149596	5.14045	9.82907	0.451822	0.0459679	-4.44323	0.00986095	0.0362939
COMMD7	ENSG00000149600	1659.38	1102.67	2216.09	2.00975	1.00701	5.08514e-13	7.04772e-12
OCSTAMP	ENSG00000149635	1496.76	11.5637	2981.95	257.872	8.01051	1.50524e-280	4.74953e-277
DSN1	ENSG00000149636	484.617	647.143	322.09	0.49771	-1.00662	4.12886e-09	4.11119e-08
CDH22	ENSG00000149654	49.9785	14.6198	85.3372	5.83709	2.54525	1.15317e-09	1.20706e-08
FERMT3	ENSG00000149781	10664.2	4402.02	16926.4	3.84514	1.94304	4.65569e-52	3.35564e-50
CDC42EP2	ENSG00000149798	74.3041	20.3187	128.289	6.31385	2.65852	1.35387e-14	2.11016e-13
TBX6	ENSG00000149922	56.6871	85.6538	27.7203	0.323632	-1.62757	6.75386e-05	0.000384823
FAM57B	ENSG00000149926	164.942	256.63	73.2535	0.285444	-1.80872	1.15951e-12	1.5613e-11
DOC2A	ENSG00000149927	76.23	135.211	17.2488	0.12757	-2.97064	3.79216e-16	6.61079e-15
HIRIP3	ENSG00000149929	668.799	930.2	407.398	0.437968	-1.1911	3.24553e-12	4.23754e-11
HMGA2	ENSG00000149948	160.595	0.991088	320.2	323.079	8.33574	2.05568e-76	2.79316e-74
MMP3	ENSG00000149968	5.46167	0	10.9233	Inf	Inf	0.000727848	0.00344575
ITGB1	ENSG00000150093	5005.55	1750.87	8260.23	4.71779	2.23811	1.29805e-65	1.35026e-63
ARID5B	ENSG00000150347	114.238	9.16811	219.309	23.9208	4.5802	6.03195e-41	3.10317e-39
FAM124A	ENSG00000150510	59.9474	35.1865	84.7082	2.40741	1.26748	0.000463846	0.00227304
LYPD6B	ENSG00000150556	11.9302	3.30411	20.5562	6.22141	2.63724	0.00205867	0.00885388
PDCD4	ENSG00000150593	1088.38	1636.97	539.783	0.329744	-1.60058	6.95117e-17	1.2719e-15
[truncated: 2,487 more rows]

## Sheet: TF
genename	id	baseMean	baseMeanTHP	baseMeanTHPP	foldChange	log2FoldChange	pval	padj
DLX6	ENSG00000006377	32.6898	55.5045	9.87505	0.177914	-2.49075	2.709e-06	1.92614e-05
E2F2	ENSG00000007968	347.579	528.788	166.369	0.314623	-1.6683	6.42505e-10	6.92875e-09
MLXIPL	ENSG00000009950	383.329	549.353	217.306	0.395568	-1.338	5.24303e-14	7.76285e-13
PHF7	ENSG00000010318	339.504	535.971	143.037	0.266875	-1.90577	1.25029e-23	3.33701e-22
HIVEP2	ENSG00000010818	221.415	391.424	51.4068	0.131333	-2.9287	4.14309e-35	1.75083e-33
DPF1	ENSG00000011332	32.6325	55.4224	9.84254	0.177592	-2.49337	1.39567e-06	1.02732e-05
ISL1	ENSG00000016082	15.3378	25.1091	5.56649	0.221692	-2.17337	0.00247995	0.0104831
POU2F2	ENSG00000028277	1626.48	692.818	2560.14	3.69526	1.88568	4.13179e-42	2.19727e-40
ARNTL2	ENSG00000029153	157.413	88.7914	226.036	2.54569	1.34806	1.16358e-08	1.1055e-07
ZIC2	ENSG00000043355	891.089	1229.3	552.882	0.449755	-1.15279	7.44807e-07	5.70878e-06
ALX4	ENSG00000052850	494.043	802.678	185.407	0.230986	-2.11412	5.53819e-34	2.24356e-32
PRDM1	ENSG00000057657	173.24	53.9354	292.544	5.42398	2.43935	4.33054e-24	1.18477e-22
DLX3	ENSG00000064195	367.392	8.92051	725.863	81.3701	6.34643	3.00144e-116	8.35635e-114
SPI1	ENSG00000066336	8711.99	5690.29	11733.7	2.06206	1.04408	1.88092e-16	3.34467e-15
KLF6	ENSG00000067082	1131.54	404.806	1858.27	4.59052	2.19866	2.87798e-49	1.90067e-47
MEF2A	ENSG00000068305	955.083	390.681	1519.48	3.88932	1.95952	7.48274e-39	3.67638e-37
TFE3	ENSG00000068323	1590.81	899.155	2282.46	2.53845	1.34395	8.83947e-22	2.16149e-20
RORA	ENSG00000069667	11.328	18.8318	3.82423	0.203073	-2.29993	0.0130804	0.046607
HLTF	ENSG00000071794	326.13	498.3	153.96	0.308971	-1.69446	1.36058e-06	1.0041e-05
NFATC3	ENSG00000072736	1787.53	1115.63	2459.42	2.20451	1.14046	9.48447e-17	1.71664e-15
TP63	ENSG00000073282	11.0229	18.254	3.79172	0.207719	-2.26729	0.00842434	0.0315197
TXK	ENSG00000074966	107.988	45.4282	170.548	3.75422	1.90851	8.22494e-12	1.04041e-10
TCF7	ENSG00000081059	130.572	198.976	62.1676	0.312437	-1.67836	4.13594e-11	4.96838e-10
NFE2L1	ENSG00000082641	5410.16	3458.5	7361.82	2.12862	1.08992	6.53507e-18	1.27636e-16
EBF4	ENSG00000088881	54.0443	93.5832	14.5054	0.155	-2.68966	5.16981e-08	4.59219e-07
CREM	ENSG00000095794	222.918	82.1017	363.734	4.43028	2.1474	4.00102e-23	1.04431e-21
PATZ1	ENSG00000100105	1302.61	1877.6	727.623	0.387528	-1.36763	1.65316e-13	2.37463e-12
HIF1A	ENSG00000100644	1032.64	664.813	1400.47	2.10657	1.0749	9.79702e-12	1.2305e-10
MYBL2	ENSG00000101057	5266.95	7652.89	2881	0.376459	-1.40943	1.85729e-08	1.72702e-07
SALL4	ENSG00000101115	42.993	83.3401	2.64591	0.0317484	-4.97717	1.22357e-18	2.49978e-17
TCFL5	ENSG00000101190	459.742	614.774	304.711	0.495647	-1.01261	0.000569052	0.00274455
KLF5	ENSG00000102554	251.631	44.1896	459.073	10.3887	3.37695	4.22871e-49	2.77337e-47
TSC22D1	ENSG00000102804	2335.82	576.773	4094.87	7.09962	2.82774	1.65192e-88	2.87799e-86
HSF4	ENSG00000102878	79.1644	108.697	49.632	0.45661	-1.13097	0.000486602	0.0023735
MYEF2	ENSG00000104177	387.367	562.478	212.257	0.37736	-1.40599	6.59822e-07	5.09036e-06
TRPS1	ENSG00000104447	261.038	128.85	393.225	3.05181	1.60966	1.26683e-15	2.12495e-14
RELB	ENSG00000104856	734.255	390.191	1078.32	2.76357	1.46653	9.89394e-21	2.28988e-19
ZNF175	ENSG00000105497	298.213	195.506	400.921	2.05069	1.03611	6.41461e-08	5.62576e-07
PBX4	ENSG00000105717	24.9323	38.4895	11.3752	0.295539	-1.75858	0.00153515	0.00679053
ZNF85	ENSG00000105750	169.419	251.918	86.9203	0.345034	-1.53519	8.43968e-10	8.95628e-09
HOXA1	ENSG00000105991	81.3395	51.5409	111.138	2.15631	1.10856	0.000338455	0.00170265
HOXA5	ENSG00000106004	65.8466	97.7123	33.9808	0.347764	-1.52382	1.31843e-05	8.49106e-05
HOXA6	ENSG00000106006	8.13619	15.6109	0.661477	0.0423728	-4.56072	0.000318164	0.00160797
HOXA13	ENSG00000106031	535.009	784.833	285.185	0.36337	-1.46049	5.90188e-19	1.22248e-17
AHR	ENSG00000106546	598.275	147.436	1049.11	7.11572	2.83101	8.39515e-60	7.42696e-58
GLI3	ENSG00000106571	13.0426	4.62532	21.4599	4.63965	2.21402	0.00312139	0.0129183
CREB3	ENSG00000107175	933.494	506.898	1360.09	2.68317	1.42394	6.00234e-22	1.47964e-20
LHX3	ENSG00000107187	364.267	726.276	2.25911	0.00311054	-8.32862	2.81224e-125	9.07522e-123
GLIS3	ENSG00000107249	73.3361	11.3161	135.356	11.9614	3.58032	6.15424e-21	1.44796e-19
EBF3	ENSG00000108001	510.459	907.987	112.931	0.124375	-3.00723	1.10322e-58	9.46503e-57
HOXB6	ENSG00000108511	29.2699	40.3077	18.2321	0.452323	-1.14458	0.01178	0.0425122
NFKB1	ENSG00000109320	1023.41	643.842	1402.97	2.17906	1.12371	1.38058e-14	2.14825e-13
NKX3-2	ENSG00000109705	405.664	569.012	242.316	0.425853	-1.23157	7.0662e-10	7.56944e-09
RNF141	ENSG00000110315	399.168	247.954	550.381	2.21969	1.15036	4.73266e-11	5.64697e-10
CSRNP2	ENSG00000110925	532.569	352.277	712.861	2.02358	1.01691	7.60262e-10	8.10737e-09
ELK3	ENSG00000111145	328.881	186.751	471.012	2.52214	1.33465	9.57074e-13	1.29733e-11
FOXM1	ENSG00000111206	1162.22	1735.62	588.83	0.339263	-1.55953	2.23789e-12	2.9504e-11
CUX2	ENSG00000111249	109.877	39.9772	179.776	4.49695	2.16895	3.65486e-14	5.47085e-13
PPARD	ENSG00000112033	5284.66	1416.29	9153.03	6.46268	2.69213	1.13492e-89	2.027e-87
PRDM13	ENSG00000112238	17.1337	27.5876	6.67979	0.242131	-2.04614	0.00190919	0.00826482
SIM1	ENSG00000112246	83.722	141.321	26.1227	0.184846	-2.4356	6.43621e-08	5.642e-07
SRF	ENSG00000112658	5452.99	3500.8	7405.18	2.11528	1.08085	2.47989e-17	4.66384e-16
BCL6	ENSG00000113916	574.974	66.6555	1083.29	16.2521	4.02255	1.16466e-99	2.5056e-97
TFDP2	ENSG00000114126	289.902	397.786	182.017	0.457575	-1.12792	1.34451e-09	1.40013e-08
HES1	ENSG00000114315	412.704	3.46917	821.938	236.927	7.8883	6.06534e-147	2.82367e-144
STAT1	ENSG00000115415	4352.21	1977.61	6726.81	3.40149	1.76617	3.21188e-42	1.71772e-40
OTX1	ENSG00000115507	1835.84	2742.96	928.714	0.338581	-1.56243	2.96291e-30	1.05308e-28
EPAS1	ENSG00000116016	335.959	512.102	159.816	0.312079	-1.68002	1.18112e-19	2.56433e-18
NR5A2	ENSG00000116833	7.13162	0	14.2632	Inf	Inf	7.38754e-05	0.000417828
KLF9	ENSG00000119138	405.684	222.679	588.688	2.64367	1.40254	4.94044e-16	8.55479e-15
NR4A3	ENSG00000119508	53.401	14.1235	92.6785	6.56198	2.71413	1.6844e-09	1.73941e-08
ONECUT2	ENSG00000119547	706.685	975.783	437.587	0.448447	-1.15699	0.0108431	0.0394901
BCL11A	ENSG00000119866	224.054	412.902	35.2063	0.0852653	-3.5519	8.55857e-48	5.36526e-46
NKX2-3	ENSG00000119919	27.2113	45.7584	8.66423	0.189347	-2.40089	7.36881e-06	4.93536e-05
TBX2	ENSG00000121068	344.978	181.136	508.82	2.80906	1.49009	5.07465e-16	8.78184e-15
TBX4	ENSG00000121075	60.3488	103.658	17.0392	0.164378	-2.60491	5.52471e-11	6.56722e-10
TSHZ3	ENSG00000121297	271.344	394.071	148.618	0.377136	-1.40684	3.04747e-13	4.29916e-12
LHX4	ENSG00000121454	48.0359	76.4842	19.5876	0.256099	-1.96523	7.94141e-07	6.05911e-06
HOXA7	ENSG00000122592	12.487	22.0533	2.92059	0.132433	-2.91667	0.00104891	0.00478871
NEUROG3	ENSG00000122859	127.468	174.197	80.7394	0.463496	-1.10937	1.11784e-05	7.26586e-05
EGR2	ENSG00000122877	560.493	32.0482	1088.94	33.9782	5.08654	3.08191e-128	1.05446e-125
NR4A1	ENSG00000123358	157.804	244.403	71.204	0.291338	-1.77923	3.16906e-13	4.4574e-12
NFE2	ENSG00000123405	181.806	96.1431	267.47	2.782	1.47612	9.50532e-11	1.10946e-09
BATF3	ENSG00000123685	189.258	298.34	80.1754	0.268738	-1.89573	2.01874e-16	3.58077e-15
SNAI1	ENSG00000124216	341.593	74.0898	609.097	8.22106	3.03932	9.23547e-51	6.47577e-49
SOX4	ENSG00000124766	573.187	279.589	866.785	3.10021	1.63237	3.72962e-23	9.74367e-22
SOX9	ENSG00000125398	4.12246	0	8.24491	Inf	Inf	0.00480505	0.019052
PAX8	ENSG00000125618	49.4946	69.3819	29.6072	0.426729	-1.22861	0.000747879	0.003535
FOSB	ENSG00000125740	311.359	599.242	23.4768	0.0391775	-4.67383	5.33996e-79	7.50714e-77
OVOL2	ENSG00000125850	92.2803	164.698	19.8622	0.120598	-3.05173	3.55532e-20	7.98135e-19
THRA	ENSG00000126351	625.766	856.369	395.163	0.46144	-1.11579	6.15642e-07	4.76896e-06
NR1D1	ENSG00000126368	128.718	179.649	77.7863	0.43299	-1.2076	2.3909e-06	1.71154e-05
STAT5A	ENSG00000126561	889.285	576.943	1201.63	2.08275	1.05849	1.2182e-12	1.63722e-11
GLIS2	ENSG00000126603	213.812	300.076	127.548	0.425054	-1.23428	8.83567e-09	8.51138e-08
SIX1	ENSG00000126778	119.463	171.966	66.9605	0.389381	-1.36074	2.95415e-07	2.37587e-06
KLF2	ENSG00000127528	327.999	565.546	90.4519	0.159937	-2.64442	2.52345e-09	2.55749e-08
FOXP2	ENSG00000128573	524.891	704.462	345.321	0.490191	-1.02858	8.54491e-07	6.48126e-06
HOXD13	ENSG00000128714	14.4674	23.7876	5.14718	0.216381	-2.20835	0.00439207	0.0175547
PHF10	ENSG00000130024	2454.63	3306.25	1603	0.484839	-1.04442	3.94964e-15	6.41292e-14
JUND	ENSG00000130522	4689.76	3095.92	6283.6	2.02964	1.02123	3.98522e-15	6.46699e-14
NPAS1	ENSG00000130751	239.195	358.718	119.672	0.333611	-1.58376	9.05772e-15	1.42598e-13
PPARG	ENSG00000132170	221.969	106.797	337.141	3.15684	1.65848	4.74958e-15	7.65486e-14
E2F5	ENSG00000133740	97.7076	134.715	60.7	0.45058	-1.15014	5.40359e-05	0.000313523
ARNTL	ENSG00000133794	304.567	202.033	407.102	2.01503	1.0108	1.33387e-07	1.12535e-06
GSC	ENSG00000133937	52.5176	73.3459	31.6892	0.432051	-1.21073	0.00121776	0.00549354
BHLHE40	ENSG00000134107	1431.28	632.116	2230.44	3.52853	1.81907	4.08731e-37	1.8631e-35
RAX	ENSG00000134438	219.723	374.084	65.3629	0.174728	-2.51682	2.84895e-13	4.0251e-12
SOX3	ENSG00000134595	43.751	82.5969	4.90502	0.059385	-4.07376	2.35099e-15	3.89746e-14
ETS1	ENSG00000134954	816.706	485.422	1147.99	2.36493	1.2418	2.87756e-16	5.04114e-15
TBX3	ENSG00000135111	136.677	81.6058	191.747	2.34968	1.23246	1.1714e-06	8.7487e-06
HEY2	ENSG00000135547	48.4586	1.81711	95.1001	52.3358	5.70973	1.5476e-23	4.10735e-22
EGR4	ENSG00000135625	82.5009	36.2605	128.741	3.55046	1.828	7.71077e-09	7.50068e-08
EMX1	ENSG00000135638	9.78358	16.4369	3.13024	0.19044	-2.39259	0.0111681	0.0405616
SP110	ENSG00000135899	879.637	496.159	1263.12	2.54579	1.34811	2.07056e-19	4.44107e-18
SKIL	ENSG00000136603	219.249	100.602	337.897	3.35875	1.74792	1.43754e-11	1.78658e-10
KLF4	ENSG00000136826	328.218	128.19	528.245	4.12079	2.04292	1.44548e-26	4.47641e-25
LMX1B	ENSG00000136944	95.0945	129.843	60.3457	0.464758	-1.10545	0.000667385	0.00317727
MYC	ENSG00000136997	5689.8	8759.08	2620.53	0.299179	-1.74092	2.68221e-41	1.39761e-39
TFAP2A	ENSG00000137203	140.639	76.1534	205.125	2.69358	1.42952	4.24425e-09	4.22165e-08
FOXF2	ENSG00000137273	41.3598	67.7299	14.9897	0.221316	-2.17582	1.246e-06	9.24914e-06
SIX3	ENSG00000138083	15.423	26.1831	4.66285	0.178086	-2.48935	0.000515201	0.0025014
CARF	ENSG00000138380	166.446	225.9	106.992	0.473626	-1.07818	3.25064e-05	0.000196952
PRDM5	ENSG00000138738	43.4531	62.5258	24.3805	0.389926	-1.35873	0.00141805	0.00631384
FOXN4	ENSG00000139445	5.14045	9.82907	0.451822	0.0459679	-4.44323	0.00986095	0.0362939
ZIC5	ENSG00000139800	167.99	225.406	110.574	0.490555	-1.02751	1.20294e-05	7.77981e-05
TGFB1I1	ENSG00000140682	313.277	115.058	511.495	4.44554	2.15236	1.02135e-27	3.26259e-26
ZFHX3	ENSG00000140836	95.1534	139.175	51.1321	0.367395	-1.44459	1.04495e-06	7.84828e-06
GATA6	ENSG00000141448	37.0891	60.5439	13.6343	0.225196	-2.15075	4.278e-06	2.96237e-05
POU2F1	ENSG00000143190	918.131	1320.64	515.627	0.390438	-1.35683	8.81537e-20	1.93461e-18
CREB3L4	ENSG00000143578	274.94	393.161	156.718	0.398611	-1.32695	6.27371e-12	8.0325e-11
CSRNP1	ENSG00000144655	802.548	373.67	1231.43	3.29549	1.72049	9.25426e-29	3.09909e-27
NFKBIZ	ENSG00000144802	126.01	54.4313	197.589	3.63006	1.85999	2.4198e-12	3.1811e-11
EAF2	ENSG00000145088	651.795	961.252	342.339	0.356139	-1.48949	9.4307e-08	8.09348e-07
ZNF711	ENSG00000147180	87.166	147.515	26.8167	0.181789	-2.45966	3.93492e-05	0.000234756
NR6A1	ENSG00000148200	104.293	148.757	59.8289	0.402191	-1.31405	2.51762e-06	1.79727e-05
TCF7L2	ENSG00000148737	158.829	73.1809	244.477	3.34073	1.74016	5.4926e-13	7.5853e-12
TBX6	ENSG00000149922	56.6871	85.6538	27.7203	0.323632	-1.62757	6.75386e-05	0.000384823
HMGA2	ENSG00000149948	160.595	0.991088	320.2	323.079	8.33574	2.05568e-76	2.79316e-74
ARID5B	ENSG00000150347	114.238	9.16811	219.309	23.9208	4.5802	6.03195e-41	3.10317e-39
BTBD11	ENSG00000151136	195.985	347.405	44.5645	0.128278	-2.96265	5.82895e-16	1.00627e-14
VENTX	ENSG00000151650	167.225	109.606	224.843	2.05136	1.03658	5.25919e-06	3.59707e-05
POU4F1	ENSG00000152192	109.256	190.55	27.9625	0.146746	-2.7686	1.90127e-19	4.08413e-18
TCF7L1	ENSG00000152284	131.027	197.077	64.9761	0.329699	-1.60078	6.00351e-10	6.49476e-09
ZNF256	ENSG00000152454	47.525	70.7021	24.3479	0.344374	-1.53795	0.000164621	0.000877255
NR4A2	ENSG00000153234	171.039	81.0274	261.05	3.22175	1.68784	2.18271e-13	3.11012e-12
CC2D1B	ENSG00000154222	1866.55	1164.46	2568.65	2.20588	1.14136	5.2303e-17	9.66364e-16
BACH1	ENSG00000156273	561.093	292.472	829.714	2.8369	1.50431	9.90225e-21	2.28994e-19
NRG1	ENSG00000157168	47.3902	0.826027	93.9543	113.742	6.82963	4.87566e-25	1.39858e-23
ZSCAN12	ENSG00000158691	61.519	82.9267	40.1113	0.483696	-1.04783	0.0020114	0.00866368
BTG2	ENSG00000159388	2077.63	345.008	3810.25	11.0439	3.46518	4.46238e-121	1.32003e-118
TAL1	ENSG00000162367	27.0071	52.4491	1.56512	0.0298407	-5.06657	4.99861e-12	6.43767e-11
ZNF496	ENSG00000162714	1774.33	2518.47	1030.19	0.409054	-1.28964	3.44361e-14	5.16596e-13
ATF3	ENSG00000162772	229.655	76.65	382.66	4.9923	2.3197	1.01224e-26	3.15192e-25
IFI16	ENSG00000163565	456.875	79.4572	834.293	10.4999	3.39231	9.72135e-71	1.15994e-68
KLF15	ENSG00000163884	81.1608	114.562	47.7597	0.41689	-1.26226	4.35992e-05	0.000258267
HEYL	ENSG00000163909	585.807	880.733	290.882	0.330272	-1.59827	6.40203e-23	1.65277e-21
HEY1	ENSG00000164683	22.5471	4.70821	40.3859	8.57777	3.1006	1.18648e-06	8.85274e-06
EN2	ENSG00000164778	58.723	79.0445	38.4015	0.485821	-1.0415	0.00396833	0.0160394
GPER1	ENSG00000164850	53.8955	9.99449	97.7965	9.78504	3.29058	2.46691e-06	1.76373e-05
OSR2	ENSG00000164920	186.442	337.822	35.0616	0.103787	-3.2683	4.27682e-37	1.94325e-35
NFIL3	ENSG00000165030	604.06	291.98	916.14	3.13768	1.6497	7.83148e-13	1.06768e-11
NKX6-3	ENSG00000165066	22.5393	35.93	9.14856	0.254622	-1.97357	0.000663246	0.00315862
ZNF367	ENSG00000165244	354.762	488.473	221.051	0.452535	-1.1439	2.50667e-06	1.7908e-05
ZNF22	ENSG00000165512	448.993	643.344	254.642	0.395809	-1.33712	4.13987e-15	6.70645e-14
DACH1	ENSG00000165659	95.2034	151.731	38.6762	0.254901	-1.97199	1.03869e-10	1.20938e-09
GFI1B	ENSG00000165702	25.9204	0	51.8407	Inf	Inf	2.19023e-09	2.23734e-08
IRF2	ENSG00000168310	932.656	453.951	1411.36	3.10906	1.63648	8.41262e-28	2.69337e-26
STAT3	ENSG00000168610	4001.65	2433.06	5570.24	2.2894	1.19497	9.82085e-21	2.27482e-19
SHOX2	ENSG00000168779	1746.34	2438.08	1054.6	0.432555	-1.20905	1.8267e-18	3.68428e-17
ATF5	ENSG00000169136	9022.86	14526.4	3519.34	0.242272	-2.0453	1.26394e-18	2.5804e-17
FOXD4	ENSG00000170122	361.417	486.407	236.427	0.486069	-1.04077	9.3334e-05	0.00051879
FOS	ENSG00000170345	2341.1	3593.8	1088.4	0.302856	-1.72329	2.47845e-37	1.13888e-35
SIX2	ENSG00000170577	277	407.121	146.879	0.360775	-1.47083	3.79744e-12	4.92195e-11
HOXB9	ENSG00000170689	22.8575	45.2632	0.451822	0.0099821	-6.64644	7.32091e-12	9.30614e-11
ZNF692	ENSG00000171163	803.323	1204.01	402.637	0.334414	-1.58029	8.54204e-24	2.30367e-22
JUNB	ENSG00000171223	1696.51	1052.2	2340.81	2.22467	1.15359	3.906e-17	7.25934e-16
OTP	ENSG00000171540	28.1793	41.5461	14.8126	0.356534	-1.48789	0.00719114	0.0273493
ZNF274	ENSG00000171606	724.624	1069.46	379.786	0.355119	-1.49362	1.20753e-21	2.93339e-20
ARNT2	ENSG00000172379	71.9263	8.01232	135.84	16.9539	4.08355	7.03801e-24	1.90711e-22
RARG	ENSG00000172819	430.465	89.2051	771.724	8.65112	3.11289	4.82403e-60	4.34898e-58
DMRT2	ENSG00000173253	162.766	93.9948	231.537	2.4633	1.30059	2.70451e-08	2.47192e-07
INSM1	ENSG00000173404	13.7314	25.0266	2.43625	0.0973466	-3.36073	5.33689e-05	0.000310186
NR1D2	ENSG00000174738	63.7208	87.7171	39.7245	0.452871	-1.14283	0.000970978	0.00446974
FOSL1	ENSG00000175592	976.529	340.053	1613	4.7434	2.24592	5.45237e-49	3.55946e-47
NR2F1	ENSG00000175745	34.8041	50.0532	19.555	0.390685	-1.35592	0.00177054	0.00772112
FOXG1	ENSG00000176165	24.1789	42.3721	5.98581	0.141268	-2.8235	1.35611e-06	1.00132e-05
IRX5	ENSG00000176842	1021.55	1502.28	540.831	0.360008	-1.4739	1.05105e-22	2.68173e-21
HIC1	ENSG00000177374	35.9724	19.4102	52.5347	2.70655	1.43646	0.00321681	0.01327
TGIF1	ENSG00000177426	617.445	398.612	836.278	2.09797	1.069	1.8225e-11	2.25513e-10
IRX3	ENSG00000177508	4407.66	6352.78	2462.53	0.38763	-1.36725	2.28708e-26	6.99876e-25
SOX12	ENSG00000177732	2274.72	3117.47	1431.96	0.459336	-1.12238	7.50838e-10	8.01591e-09
MAF	ENSG00000178573	129.574	23.7876	235.361	9.8943	3.3066	1.69128e-30	6.04137e-29
MSC	ENSG00000178860	230.803	31.1389	430.467	13.8241	3.78911	1.05025e-54	8.19367e-53
GATA2	ENSG00000179348	3151.39	744.612	5558.17	7.46452	2.90005	7.37998e-97	1.48636e-94
ARID3B	ENSG00000179361	374.038	205.419	542.656	2.6417	1.40147	4.41841e-15	7.13732e-14
EGR3	ENSG00000179388	168.678	88.3791	248.978	2.81715	1.49424	8.29356e-10	8.81439e-09
ZNF154	ENSG00000179909	25.5931	40.4724	10.7137	0.264715	-1.91749	0.000478516	0.00233767
TSHZ1	ENSG00000179981	3384.79	1444.7	5324.88	3.6858	1.88198	3.76693e-46	2.23326e-44
ALX1	ENSG00000180318	21.3376	34.6074	8.06777	0.233123	-2.10084	0.00555611	0.0217092
BHLHE22	ENSG00000180828	21.8401	7.02087	36.6592	5.22147	2.38446	6.5349e-05	0.00037351
SOX1	ENSG00000182968	66.165	114.727	17.6031	0.153435	-2.7043	2.19529e-13	3.12647e-12
TBX1	ENSG00000184058	467.734	645.829	289.638	0.448475	-1.1569	2.97416e-06	2.10571e-05
FOXO4	ENSG00000184481	443.325	252.168	634.482	2.51611	1.33119	3.51234e-15	5.74559e-14
WT1	ENSG00000184937	1344.73	749.489	1939.98	2.5884	1.37206	8.84446e-22	2.16149e-20
ZFP90	ENSG00000184939	443.03	593.208	292.851	0.493674	-1.01837	3.26937e-09	3.28375e-08
MAFF	ENSG00000185022	223.274	51.1279	395.419	7.73393	2.9512	3.36014e-37	1.53657e-35
IRF7	ENSG00000185507	1591.45	714.298	2468.61	3.45599	1.7891	4.26828e-37	1.94248e-35
SNAI3	ENSG00000185669	132.353	77.3939	187.312	2.42025	1.27515	4.29843e-07	3.38511e-06
MYBL1	ENSG00000185697	65.7098	100.602	30.8181	0.306338	-1.7068	1.64221e-05	0.000104283
ZNF267	ENSG00000185947	392.439	167.338	617.54	3.69037	1.88377	3.3471e-20	7.53176e-19
ZNF284	ENSG00000186026	14.1179	22.879	5.35684	0.234138	-2.09457	0.00605894	0.0234687
ZNF395	ENSG00000186918	523.1	823.989	222.211	0.269677	-1.89069	2.19397e-23	5.79038e-22
MITF	ENSG00000187098	57.2688	18.5013	96.0363	5.19079	2.37596	1.55114e-10	1.77833e-09
FOXD3	ENSG00000187140	26.6497	39.0687	14.2307	0.364249	-1.457	0.00305347	0.012668
MESP2	ENSG00000188095	14.6141	23.2098	6.01832	0.2593	-1.9473	0.00679946	0.0260371
HES4	ENSG00000188290	249.789	134.633	364.944	2.71066	1.43864	6.23835e-13	8.5583e-12
PLSCR1	ENSG00000188313	845.285	454.528	1236.04	2.7194	1.44329	5.49288e-22	1.35641e-20
TCF4	ENSG00000196628	262.424	102.253	422.594	4.13282	2.04712	3.53095e-24	9.6881e-23
ZNF136	ENSG00000196646	94.8248	131.74	57.9095	0.439573	-1.18582	0.00281033	0.0117451
ZNF431	ENSG00000196705	237.556	318.986	156.125	0.489443	-1.03079	0.00069403	0.00329638
ZNF239	ENSG00000196793	93.2401	153.71	32.77	0.213193	-2.22977	1.83518e-05	0.000115761
ARID5A	ENSG00000196843	1205.84	794.915	1616.77	2.03389	1.02424	4.50958e-13	6.27145e-12
ZNF138	ENSG00000197008	140.444	200.954	79.9333	0.397768	-1.33	0.00757858	0.0286688
MAFG	ENSG00000197063	6460.24	4244.05	8676.42	2.04437	1.03166	5.8737e-17	1.07962e-15
ZNF433	ENSG00000197647	45.1775	70.7024	19.6526	0.277962	-1.84704	1.1151e-05	7.24968e-05
TEAD4	ENSG00000197905	165.652	224.087	107.216	0.478458	-1.06353	0.000374007	0.00186629
ZNF251	ENSG00000198169	278.976	389.276	168.675	0.433305	-1.20655	7.16126e-10	7.66549e-09
HOXC4	ENSG00000198353	5.05774	9.66365	0.451822	0.0467548	-4.41874	0.011897	0.0428743
ZNF69	ENSG00000198429	21.7392	37.9118	5.56649	0.146827	-2.76781	1.07278e-05	6.99373e-05
MAFK	ENSG00000198517	313.18	186.339	440.02	2.36139	1.23964	3.9008e-11	4.70382e-10
ZNF43	ENSG00000198521	106.654	147.187	66.1219	0.449237	-1.15445	3.91041e-05	0.00023349
ZNF536	ENSG00000198597	20.3366	7.51641	33.1568	4.41125	2.14119	0.0012315	0.00555027
PAX9	ENSG00000198807	29.7022	40.7204	18.6839	0.458834	-1.12395	0.0140415	0.0495958
POU3F3	ENSG00000198914	47.574	65.1685	29.9795	0.46003	-1.1202	0.00668918	0.0256598
MAFB	ENSG00000204103	1157.23	30.5605	2283.9	74.7337	6.22369	4.42827e-215	5.98829e-212
POU5F1	ENSG00000204531	17.3154	27.2571	7.37378	0.270527	-1.88615	0.00502244	0.0198121
SARNP	ENSG00000205323	220.034	60.957	379.11	6.21931	2.63675	1.16739e-31	4.32789e-30
DPF3	ENSG00000205683	173.501	38.8204	308.181	7.93863	2.98889	5.02141e-33	1.9534e-31
ONECUT3	ENSG00000205922	6.71023	12.3072	1.1133	0.0904595	-3.46658	0.0058596	0.0227791
MXD3	ENSG00000213347	525.105	752.211	297.999	0.396164	-1.33583	8.03898e-16	1.36865e-14
SP9	ENSG00000217236	558.248	818.124	298.371	0.364701	-1.45521	1.14791e-17	2.21456e-16
ZNF492	ENSG00000229676	25.0991	41.7111	8.48708	0.203473	-2.29709	6.51013e-05	0.000372281
ETV5	ENSG00000244405	1968.27	888.83	3047.72	3.42891	1.77775	3.92545e-36	1.73637e-34
HOXA10	ENSG00000253293	647.499	864.046	430.951	0.498759	-1.00359	1.41089e-10	1.62146e-09
ZNF10	ENSG00000256223	47.6838	66.3243	29.0433	0.437898	-1.19133	0.0034201	0.0140272
SPIB	ENSG00000269404	10.6732	18.0064	3.3399	0.185483	-2.43064	0.00519446	0.0204197
