# Supplementary material for: Decoding the spatial chromatin organization and dynamic epigenetic landscapes of macrophage cells during differentiation and immune activation
Source: Nat Commun. 2022 Oct 4;13:5857. doi: 10.1038/s41467-022-33558-5 (PMC9532393; doi:10.1038/s41467-022-33558-5)
Supplement: Supplementary file 5 — Supplementary Dataset 2 [file 41467_2022_33558_MOESM5_ESM.xlsx]

## Sheet: All gene
genename	id	baseMean	baseMeanTHPP	baseMeanRa	foldChange	log2FoldChange	pval	padj
ANKIB1	ENSG00000001629	434.703	277.888	591.519	2.12862	1.08992	1.09941e-13	1.48529e-12
LAP3	ENSG00000002549	5747.34	1683.6	9811.08	5.82744	2.54286	4.46196e-91	3.8693e-89
HS3ST1	ENSG00000002587	344.63	81.6561	607.604	7.44101	2.8955	9.4629e-37	3.07101e-35
TMEM176A	ENSG00000002933	13.7425	4.78886	22.6962	4.73937	2.2447	0.00233027	0.0106556
DBNDD1	ENSG00000003249	49.1265	76.0302	22.2229	0.29229	-1.77453	0.00106247	0.00519505
CASP10	ENSG00000003400	855.699	233.839	1477.56	6.31871	2.65963	2.38796e-99	2.3535e-97
CFLAR	ENSG00000003402	4375.82	1149.2	7602.43	6.61539	2.72583	7.99501e-171	1.65534e-168
PLXND1	ENSG00000004399	4966.8	6767.32	3166.27	0.467877	-1.0958	1.39792e-32	4.08054e-31
CD38	ENSG00000004468	469.979	118.405	821.553	6.93848	2.79462	1.72126e-77	1.22923e-75
ARHGAP33	ENSG00000004777	101.402	138.173	64.6309	0.467754	-1.09618	3.19577e-05	0.000198872
ZMYND10	ENSG00000004838	27.8212	48.0676	7.5749	0.157589	-2.66576	1.52152e-06	1.12074e-05
ARX	ENSG00000004848	52.7109	86.6851	18.7367	0.216147	-2.20992	3.90197e-08	3.39804e-07
CCDC109B	ENSG00000005059	213.063	128.422	297.704	2.31818	1.21299	1.2508e-10	1.35638e-09
THSD7A	ENSG00000005108	1139.28	1577.25	701.312	0.444644	-1.16928	6.4575e-12	7.76907e-11
PDK2	ENSG00000005882	218.707	316.46	120.955	0.382213	-1.38755	7.58217e-13	9.74085e-12
CCL18	ENSG00000006074	13.4566	1.64904	25.2642	15.3206	3.9374	3.52572e-06	2.49519e-05
CCL3	ENSG00000006075	1293.88	33.1138	2554.65	77.1477	6.26955	1.75648e-13	2.34804e-12
TMEM132A	ENSG00000006118	77.5776	19.6815	135.474	6.88332	2.78311	8.04834e-19	1.46933e-17
CACNA1G	ENSG00000006283	18.1661	8.94473	27.3875	3.06186	1.61441	0.00610134	0.0254745
RALA	ENSG00000006451	2182.87	959.288	3406.45	3.55103	1.82824	4.34078e-58	2.23818e-56
KDM7A	ENSG00000006459	290.396	184.469	396.322	2.14845	1.10329	1.54782e-11	1.79664e-10
TBXA2R	ENSG00000006638	344.219	479.696	208.742	0.435156	-1.2004	7.85445e-12	9.37794e-11
IFRD1	ENSG00000006652	549.29	357.758	740.823	2.07074	1.05015	3.8099e-15	5.64385e-14
NOS2	ENSG00000007171	14.2872	23.8832	4.69131	0.196427	-2.34793	0.00241285	0.0109974
CD79B	ENSG00000007312	27.3026	38.408	16.1972	0.421713	-1.24566	0.0124727	0.0479604
RHBDF1	ENSG00000007384	1082.78	1585.61	579.958	0.365763	-1.45102	1.13582e-35	3.61151e-34
BAIAP3	ENSG00000007516	38.6503	55.838	21.4625	0.384372	-1.37943	0.00197222	0.00915467
TEAD3	ENSG00000007866	127.561	207.735	47.3864	0.22811	-2.1322	9.87705e-17	1.62242e-15
MYLIP	ENSG00000007944	139.647	196.63	82.6643	0.420405	-1.25015	6.0544e-08	5.17793e-07
E2F2	ENSG00000007968	77.3599	111.293	43.4269	0.390204	-1.3577	8.7592e-06	5.86781e-05
NADK	ENSG00000008130	4343.21	2147.26	6539.15	3.04534	1.6066	2.53513e-66	1.53539e-64
MMP25	ENSG00000008516	76.5041	31.766	121.242	3.81673	1.93234	9.96061e-11	1.08764e-09
IL32	ENSG00000008517	66.6939	7.61219	125.776	16.5229	4.0464	1.6149e-26	3.89984e-25
RHOBTB2	ENSG00000008853	874.741	1310.23	439.247	0.335243	-1.57672	1.10665e-37	3.6993e-36
MASP2	ENSG00000009724	10.5678	17.6494	3.48616	0.197523	-2.3399	0.0076003	0.0309257
TRAF3IP3	ENSG00000009790	705.954	943.869	468.04	0.495873	-1.01196	6.25604e-16	9.73734e-15
ETV7	ENSG00000010030	384.564	5.83547	763.292	130.802	7.03124	5.73474e-183	1.43149e-180
SEMA3G	ENSG00000010319	26.1125	40.2458	11.9792	0.29765	-1.74831	0.00480799	0.0205171
HFE	ENSG00000010704	25.7746	15.0661	36.4831	2.42153	1.27592	0.0103096	0.0405596
FYN	ENSG00000010810	753.483	391.943	1115.02	2.84486	1.50836	5.87005e-34	1.77357e-32
HIVEP2	ENSG00000010818	673.268	34.3798	1312.16	38.1664	5.25423	1.98102e-60	1.08647e-58
TCEB3	ENSG00000011007	1509.43	858.686	2160.18	2.51568	1.33095	3.08093e-36	9.91429e-35
MBTD1	ENSG00000011258	283.411	378.194	188.627	0.498758	-1.00359	4.00595e-09	3.85012e-08
PLAUR	ENSG00000011422	19245	10687.3	27802.7	2.60148	1.37933	2.48737e-42	9.41008e-41
ANLN	ENSG00000011426	239.187	357.032	121.343	0.339866	-1.55696	1.56476e-16	2.54372e-15
CEP68	ENSG00000011523	371.251	241.394	501.109	2.07589	1.05373	6.98191e-12	8.37735e-11
CD22	ENSG00000012124	335.996	515.214	156.779	0.304298	-1.71644	1.48277e-24	3.35338e-23
MVP	ENSG00000013364	4629.98	2271.52	6988.44	3.07655	1.62131	2.07458e-68	1.29463e-66
NUB1	ENSG00000013374	3147.9	977.351	5318.46	5.4417	2.44406	4.99903e-134	7.45917e-132
GPRC5A	ENSG00000013588	8.01908	0.88836	15.1498	17.0537	4.09201	0.000218463	0.00119961
MAMLD1	ENSG00000013619	259.514	79.5935	439.434	5.52098	2.46492	4.90862e-41	1.80834e-39
TACC3	ENSG00000013810	884.621	1265.71	503.532	0.397826	-1.32979	5.50679e-29	1.43774e-27
ZMYND11	ENSG00000015171	300.258	413.095	187.422	0.453703	-1.14018	8.33242e-12	9.92644e-11
BID	ENSG00000015475	3613.15	1633.23	5593.07	3.42455	1.77591	3.52776e-77	2.50593e-75
ATP2C1	ENSG00000017260	1040.8	574.094	1507.52	2.6259	1.39281	2.52639e-34	7.73822e-33
SLC38A5	ENSG00000017483	801.862	132.118	1471.61	11.1386	3.47749	1.77178e-145	3.05306e-143
VSIG2	ENSG00000019102	84.7505	119.891	49.6104	0.413797	-1.273	1.92888e-05	0.000123932
CD74	ENSG00000019582	3866.29	1871.61	5860.97	3.13151	1.64686	9.23407e-43	3.53342e-41
GPR124	ENSG00000020181	2085.84	3337.64	834.049	0.249892	-2.00062	6.77097e-82	5.06571e-80
SAMD4A	ENSG00000020577	166.993	60.7851	273.2	4.49453	2.16817	1.94745e-23	4.20489e-22
RUNX3	ENSG00000020633	8094.31	2773.58	13415	4.83673	2.27403	1.288e-134	1.95461e-132
SERPINB1	ENSG00000021355	2210.63	944.979	3476.29	3.6787	1.87919	2.05164e-58	1.07026e-56
FHL1	ENSG00000022267	162.111	273.278	50.9448	0.186421	-2.42336	7.0145e-24	1.54325e-22
GRAMD1B	ENSG00000023171	1283.86	547.643	2020.08	3.68869	1.88311	5.85881e-64	3.44676e-62
BIRC3	ENSG00000023445	686.516	31.6383	1341.39	42.3978	5.40592	5.10439e-105	5.3464e-103
PLEKHO1	ENSG00000023902	2833.8	1015.63	4651.96	4.58037	2.19546	6.1144e-107	6.58506e-105
GCLM	ENSG00000023909	933.097	443.381	1422.81	3.20901	1.68213	1.23841e-46	5.11231e-45
DEPDC1	ENSG00000024526	63.3655	110.405	16.3264	0.147878	-2.75752	2.60707e-13	3.44373e-12
TYMP	ENSG00000025708	3168.62	908.907	5428.33	5.97237	2.5783	3.43495e-147	5.95741e-145
VIM	ENSG00000026025	9438.1	5426.72	13449.5	2.47838	1.3094	1.60819e-15	2.44469e-14
FAS	ENSG00000026103	69.9736	23.1378	116.809	5.04843	2.33583	2.91674e-13	3.84328e-12
CD44	ENSG00000026508	24690.8	14495.2	34886.5	2.40675	1.26709	1.32018e-28	3.39698e-27
AGPAT4	ENSG00000026652	644.604	340.046	949.163	2.79128	1.48093	2.4641e-29	6.4969e-28
SLAMF7	ENSG00000026751	1407.75	256.165	2559.33	9.99094	3.32062	1.36794e-175	2.94647e-173
BTN3A1	ENSG00000026950	206.784	113.769	299.799	2.63515	1.39788	2.32832e-13	3.0908e-12
INSRR	ENSG00000027644	17.681	3.44104	31.921	9.27657	3.21359	2.63043e-06	1.8881e-05
SH2D2A	ENSG00000027869	324.427	37.2184	611.636	16.4337	4.03858	1.25424e-35	3.9833e-34
VRK2	ENSG00000028116	360.828	184.54	537.116	2.91057	1.5413	5.56503e-09	5.27453e-08
TNFRSF1B	ENSG00000028137	10252	4239.79	16264.1	3.83607	1.93963	3.15844e-104	3.24457e-102
POU2F2	ENSG00000028277	3161.58	1712.64	4610.52	2.69205	1.42871	1.351e-12	1.70609e-11
ARNTL2	ENSG00000029153	277.003	151.243	402.762	2.66301	1.41306	1.44661e-12	1.81994e-11
ANK1	ENSG00000029534	13.6359	23.0254	4.2465	0.184427	-2.43888	0.00147915	0.0070209
BAK1	ENSG00000030110	3101.15	1837.63	4364.67	2.37516	1.24802	5.29982e-22	1.0847e-20
GRN	ENSG00000030582	17547.2	10113.6	24980.8	2.47003	1.30453	1.36204e-24	3.08556e-23
ARHGAP31	ENSG00000031081	1663.56	397.212	2929.91	7.37619	2.88288	3.96608e-149	6.92352e-147
UBA6	ENSG00000033178	512.432	335.043	689.822	2.0589	1.04188	3.96094e-14	5.5331e-13
UHRF1	ENSG00000034063	608.159	951.424	264.893	0.278418	-1.84468	6.91819e-29	1.7957e-27
MAP2K3	ENSG00000034152	2404.99	1205.28	3604.7	2.99077	1.58052	1.25617e-46	5.17764e-45
PEX3	ENSG00000034693	108.741	50.605	166.878	3.29766	1.72144	2.6923e-10	2.85125e-09
DEPDC1B	ENSG00000035499	74.9537	114.816	35.0917	0.305634	-1.71012	1.03144e-07	8.62786e-07
STAP1	ENSG00000035720	204.907	49.1447	360.67	7.33893	2.87557	1.67634e-28	4.30101e-27
USP2	ENSG00000036672	609.198	931.337	287.059	0.308223	-1.69795	4.88293e-34	1.47867e-32
MSR1	ENSG00000038945	3033.32	715.729	5350.91	7.47617	2.9023	5.51808e-179	1.29283e-176
ZFYVE16	ENSG00000039319	291.51	167.733	415.287	2.47588	1.30794	1.5784e-14	2.26775e-13
FAM65A	ENSG00000039523	376.792	531.658	221.927	0.417423	-1.26042	2.16082e-15	3.2478e-14
RTN4R	ENSG00000040608	127.329	197.314	57.3431	0.290618	-1.78281	1.77209e-12	2.20759e-11
PSMA4	ENSG00000041357	3481.14	2215.37	4746.91	2.14272	1.09944	1.32299e-31	3.75115e-30
TNC	ENSG00000041982	339.036	143.105	534.967	3.73829	1.90238	9.87217e-32	2.82006e-30
THAP3	ENSG00000041988	378.972	226.492	531.452	2.34645	1.23048	3.01011e-16	4.80556e-15
FAM65C	ENSG00000042062	5.65917	0.88836	10.43	11.7407	3.55345	0.0037117	0.0162225
ADAM28	ENSG00000042980	66.4659	42.4056	90.5262	2.13477	1.09408	0.000557747	0.00287362
JADE2	ENSG00000043143	1203.57	650.528	1756.61	2.70029	1.43311	3.09776e-39	1.08013e-37
USP28	ENSG00000048028	128.84	85.0208	172.66	2.0308	1.02205	4.93619e-06	3.41114e-05
KITLG	ENSG00000049130	338.571	38.0915	639.05	16.7767	4.06839	1.49181e-102	1.52079e-100
H6PD	ENSG00000049239	5467.25	2553.49	8381.02	3.28219	1.71466	2.92486e-37	9.70436e-36
TNFRSF9	ENSG00000049249	301.927	25.0422	578.812	23.1135	4.53066	7.53632e-19	1.37774e-17
RCN1	ENSG00000049449	1538.89	945.53	2132.25	2.25508	1.17318	1.54163e-29	4.09298e-28
NEDD4L	ENSG00000049759	428.187	283.075	573.299	2.02525	1.0181	3.33753e-12	4.08533e-11
NFE2L3	ENSG00000050344	413.487	82.7792	744.196	8.99013	3.16834	2.19846e-83	1.68731e-81
SLC4A8	ENSG00000050438	111.519	51.2379	171.799	3.35297	1.74544	7.7018e-12	9.1998e-11
TNIP3	ENSG00000050730	53.1096	1.77672	104.442	58.7838	5.87735	8.33417e-31	2.29717e-29
FAM160A2	ENSG00000051009	756.672	1035.58	477.766	0.461352	-1.11606	2.4089e-19	4.55016e-18
HOMER3	ENSG00000051128	1299.61	1968.59	630.629	0.320346	-1.6423	1.02805e-48	4.49397e-47
RAD51	ENSG00000051180	178.271	245.443	111.099	0.452647	-1.14354	4.07993e-08	3.54492e-07
POLQ	ENSG00000051341	103.394	139.689	67.0982	0.48034	-1.05787	0.00842407	0.0339006
HEBP2	ENSG00000051620	3137.19	4391.61	1882.76	0.428718	-1.2219	3.28055e-37	1.08173e-35
MPHOSPH9	ENSG00000051825	169.052	231.296	106.809	0.461785	-1.11471	6.03507e-08	5.16637e-07
FNIP2	ENSG00000052795	1044.07	309.225	1778.92	5.75284	2.52427	1.35962e-98	1.31098e-96
ARID4B	ENSG00000054267	664.408	432.897	895.92	2.06959	1.04934	0.00870736	0.0349249
KIF1B	ENSG00000054523	512.935	322.448	703.422	2.18151	1.12532	4.88829e-16	7.6982e-15
FOXC1	ENSG00000054598	95.1255	54.4902	135.761	2.49147	1.317	7.56441e-07	5.76428e-06
PLEKHH1	ENSG00000054690	95.0536	37.6473	152.46	4.04969	2.01781	4.99767e-13	6.49867e-12
ATP9A	ENSG00000054793	367.758	216.245	519.271	2.40131	1.26382	2.23979e-16	3.59943e-15
GALC	ENSG00000054983	629.177	400.678	857.676	2.14056	1.09799	1.98007e-17	3.36636e-16
CYFIP2	ENSG00000055163	56.6384	23.296	89.9807	3.86249	1.94953	4.07801e-05	0.000249815
TAB2	ENSG00000055208	2104.21	1064.81	3143.6	2.95227	1.56183	1.05515e-54	5.15208e-53
EIF2AK2	ENSG00000055332	4053.71	1377.59	6729.82	4.8852	2.28842	1.59608e-123	2.13148e-121
CCDC85A	ENSG00000055813	32.0069	1.50607	62.5077	41.5038	5.37517	3.98351e-17	6.69154e-16
C4orf27	ENSG00000056050	72.0731	99.1985	44.9476	0.453107	-1.14208	0.000373159	0.00197768
ZFR	ENSG00000056097	5857.52	7917.46	3797.59	0.479647	-1.05995	6.24574e-32	1.78989e-30
TRAF1	ENSG00000056558	3918.2	290.937	7545.47	25.935	4.69683	0	0
PCGF2	ENSG00000056661	159.506	90.4732	228.54	2.52605	1.33688	3.09888e-10	3.26244e-09
TRAF3IP2	ENSG00000056972	1217.09	387.047	2047.13	5.28909	2.40302	1.07135e-97	1.02195e-95
GYG2	ENSG00000056998	147.104	208	86.2075	0.414459	-1.2707	8.86727e-09	8.25787e-08
SOAT1	ENSG00000057252	422.264	275.014	569.513	2.07085	1.05022	1.09348e-13	1.47877e-12
PRDM1	ENSG00000057657	1117.33	195.742	2038.92	10.4164	3.38078	3.68802e-163	7.03595e-161
TMCC3	ENSG00000057704	72.6348	6.13668	139.133	22.6724	4.50286	9.14989e-14	1.24305e-12
CAMK2B	ENSG00000058404	65.2305	92.1986	38.2623	0.414998	-1.26882	0.000136472	0.000774548
ATP2B4	ENSG00000058668	1169.33	1629.67	709.003	0.435061	-1.20071	8.7508e-27	2.13448e-25
PARP12	ENSG00000059378	3525.58	766.406	6284.76	8.2003	3.03568	1.60117e-201	4.85973e-199
ALDH18A1	ENSG00000059573	442.359	601.174	283.545	0.471651	-1.08421	4.78365e-13	6.22947e-12
MXD1	ENSG00000059728	2264.89	592.617	3937.17	6.6437	2.73199	1.01771e-140	1.63747e-138
CDK17	ENSG00000059758	507.052	323.031	691.072	2.13934	1.09717	1.4108e-07	1.16732e-06
PSD	ENSG00000059915	79.272	39.1381	119.406	3.05089	1.60923	4.86207e-08	4.19312e-07
OGFR	ENSG00000060491	4382.66	1852.98	6912.35	3.7304	1.89933	1.78206e-90	1.52554e-88
LZTS1	ENSG00000061337	99.6047	157.303	41.9062	0.266404	-1.90831	2.32812e-11	2.66189e-10
SPAG4	ENSG00000061656	49.349	31.3982	67.2997	2.14342	1.09992	0.00337719	0.0148896
GUCY1B3	ENSG00000061918	86.3899	53.6324	119.147	2.22156	1.15157	5.3225e-05	0.000320466
TNK2	ENSG00000061938	1733.81	740.015	2727.61	3.68589	1.88201	1.62727e-71	1.06526e-69
GPBP1	ENSG00000062194	1129.56	535.605	1723.51	3.21788	1.68611	2.27087e-49	1.01596e-47
LTK	ENSG00000062524	15.8084	26.1652	5.45165	0.208355	-2.26289	0.00140441	0.00670545
MRPS24	ENSG00000062582	22.4916	8.3423	36.6408	4.39218	2.13494	9.6355e-05	0.000559832
CASP8	ENSG00000064012	797.672	473.579	1121.77	2.3687	1.2441	2.72346e-24	6.10754e-23
DLX3	ENSG00000064195	267.468	485.771	49.1656	0.101211	-3.30456	2.44022e-49	1.08808e-47
NGFR	ENSG00000064300	37.2292	52.4941	21.9644	0.418416	-1.25699	0.00392062	0.0170658
CDON	ENSG00000064309	85.1806	123.505	46.8561	0.379385	-1.39826	3.73821e-06	2.63371e-05
HIPK2	ENSG00000064393	2437.65	1139.2	3736.09	3.27958	1.71351	6.76648e-66	4.07959e-64
CNN2	ENSG00000064666	7373.58	10051.1	4696.04	0.467217	-1.09784	3.64277e-34	1.10688e-32
FAR2	ENSG00000064763	1984.64	2926.27	1043.02	0.356434	-1.4883	2.45415e-39	8.60207e-38
SLC9A3R2	ENSG00000065054	264.6	420.697	108.503	0.257912	-1.95505	1.17528e-25	2.73914e-24
NTHL1	ENSG00000065057	108.038	169.321	46.7553	0.276134	-1.85656	8.3808e-12	9.97962e-11
UHRF1BP1	ENSG00000065060	2181.8	1239.61	3124	2.52016	1.33351	4.71394e-40	1.69e-38
TRAM2	ENSG00000065308	1337.92	1976.33	699.506	0.353942	-1.49841	7.70883e-42	2.89178e-40
NTN1	ENSG00000065320	401.633	142.451	660.815	4.63889	2.21378	1.07824e-45	4.35685e-44
MCM10	ENSG00000065328	128.483	178.863	78.1023	0.43666	-1.19542	4.35538e-07	3.41037e-06
KARS	ENSG00000065427	4657.89	2665.18	6650.6	2.49536	1.31925	2.41647e-46	9.89902e-45
MYLK	ENSG00000065534	275.133	440.501	109.765	0.249182	-2.00473	5.04907e-28	1.28068e-26
SEC61A2	ENSG00000065665	171.134	270.22	72.048	0.266627	-1.9071	1.42656e-16	2.32472e-15
FAM107B	ENSG00000065809	2359.84	1466.99	3252.69	2.21726	1.14878	3.09426e-31	8.6178e-30
PDE4A	ENSG00000065989	818.662	474.911	1162.41	2.44765	1.29139	1.648e-08	1.49411e-07
TIE1	ENSG00000066056	195.422	265.655	125.188	0.471244	-1.08545	8.09337e-05	0.000475508
NGEF	ENSG00000066248	126.958	195.711	58.2042	0.297398	-1.74953	7.999e-12	9.54199e-11
ASPM	ENSG00000066279	72.0931	113.442	30.7444	0.271015	-1.88356	0.00408367	0.0176948
ISOC1	ENSG00000066583	202.616	126.824	278.409	2.19524	1.13438	1.16224e-09	1.16876e-08
MSANTD3	ENSG00000066697	266.784	82.9887	450.58	5.42942	2.4408	3.17682e-41	1.17847e-39
SP100	ENSG00000067066	2364.64	1012.24	3717.05	3.67212	1.87661	5.35044e-15	7.8476e-14
KLF6	ENSG00000067082	2480.4	1243.48	3717.32	2.98946	1.57988	9.65371e-58	4.94896e-56
PPAP2A	ENSG00000067113	204.366	78.9911	329.741	4.17441	2.06157	9.0702e-10	9.19727e-09
CACNB1	ENSG00000067191	21.9454	33.4609	10.43	0.311707	-1.68174	0.00469629	0.0201114
STOML1	ENSG00000067221	113.116	74.9782	151.255	2.01732	1.01244	5.72676e-05	0.000343567
SYT1	ENSG00000067715	57.555	88.4258	26.6842	0.301769	-1.72848	6.3764e-07	4.91933e-06
NAV3	ENSG00000067798	40.6741	16.1433	65.205	4.03914	2.01405	1.04979e-06	7.85839e-06
ROGDI	ENSG00000067836	738.522	994.786	482.258	0.484786	-1.04458	1.26872e-16	2.07256e-15
HDAC4	ENSG00000068024	421.132	578.317	263.947	0.456405	-1.13161	5.53162e-14	7.61567e-13
RASSF1	ENSG00000068028	435.377	622.172	248.582	0.39954	-1.32359	1.19297e-18	2.15874e-17
IFI35	ENSG00000068079	6354.79	1707.63	11002	6.44284	2.6877	1.6822e-178	3.84016e-176
PLEKHH3	ENSG00000068137	230.334	338.464	122.204	0.361055	-1.46971	2.4646e-14	3.50144e-13
OTUD5	ENSG00000068308	2428.93	1543.61	3314.24	2.14707	1.10237	9.26597e-30	2.48479e-28
ACSL4	ENSG00000068366	3008.31	1508.21	4508.4	2.98923	1.57978	2.32779e-60	1.27143e-58
REEP1	ENSG00000068615	14.7879	25.0422	4.53354	0.181036	-2.46565	0.00184433	0.00861194
LAPTM4A	ENSG00000068697	2694.73	1083.11	4306.35	3.97593	1.99129	1.10504e-31	3.14655e-30
RASGRP2	ENSG00000068831	1589.23	2779.69	398.761	0.143455	-2.80133	9.95703e-132	1.46122e-129
IFT80	ENSG00000068885	35.8105	51.3351	20.2859	0.395167	-1.33947	0.00276488	0.0124552
MAST4	ENSG00000069020	498.466	317.108	679.823	2.14382	1.10019	1.2293e-15	1.88156e-14
BCL3	ENSG00000069399	2265.9	623.51	3908.3	6.26822	2.64806	1.16047e-28	2.99757e-27
KCNAB2	ENSG00000069424	6916.19	9630.12	4202.27	0.436367	-1.19638	8.10183e-40	2.88138e-38
CLEC2D	ENSG00000069493	31.7128	18.9513	44.4743	2.34676	1.23067	0.00495662	0.021094
ATP1B3	ENSG00000069849	2193.75	1378.63	3008.86	2.1825	1.12598	1.45478e-30	3.9852e-29
GNB5	ENSG00000069966	124.757	187.895	61.6181	0.327939	-1.6085	1.17104e-10	1.27247e-09
RAB27A	ENSG00000069974	1446.73	2268.09	625.364	0.275722	-1.85871	1.86736e-61	1.05001e-59
DAPP1	ENSG00000070190	996.246	224.016	1768.48	7.89444	2.98084	2.47543e-126	3.44355e-124
CLTCL1	ENSG00000070371	452.424	771.081	133.767	0.17348	-2.52716	8.32003e-57	4.17706e-55
ZXDC	ENSG00000070476	540.881	730.933	350.829	0.479975	-1.05897	1.27278e-14	1.83557e-13
NDST1	ENSG00000070614	3383.72	2094.54	4672.9	2.231	1.15769	2.25756e-35	7.12733e-34
ASNS	ENSG00000070669	665.443	1173.53	157.353	0.134085	-2.89879	3.92393e-58	2.02716e-56
SLC12A3	ENSG00000070915	4.00985	0	8.0197	#DIV/0!	#DIV/0!	0.00245149	0.0111621
ARHGAP10	ENSG00000071205	513.695	266.783	760.607	2.85103	1.51148	3.52467e-27	8.67653e-26
TCF3	ENSG00000071564	1377.87	1837.47	918.262	0.499743	-1.00074	2.91517e-20	5.64903e-19
CYBRD1	ENSG00000071967	27.8444	43.7382	11.9507	0.273232	-1.8718	0.00040187	0.00211833
ZFYVE26	ENSG00000072121	1020.49	490.452	1550.53	3.16142	1.66057	1.9484e-46	8.00611e-45
LIMS2	ENSG00000072163	132.257	203.813	60.7	0.297821	-1.74748	8.98136e-13	1.14832e-11
SREBF1	ENSG00000072310	2630.59	3946.56	1314.61	0.333104	-1.58596	2.94606e-57	1.49879e-55
UBE2D1	ENSG00000072401	249.965	122.862	377.068	3.06903	1.61778	3.76662e-20	7.27423e-19
MPP5	ENSG00000072415	170.93	103.665	238.194	2.29772	1.2002	2.75681e-07	2.19862e-06
RHOBTB1	ENSG00000072422	44.057	26.1805	61.9336	2.36564	1.24223	0.00236816	0.0108177
HMMR	ENSG00000072571	135.512	221.958	49.0648	0.221054	-2.17753	2.43072e-18	4.33391e-17
P4HA2	ENSG00000072682	206.106	127.406	284.807	2.23543	1.16055	1.21104e-09	1.21554e-08
NFATC3	ENSG00000072736	1154.13	1645.8	662.463	0.402517	-1.31288	3.88243e-31	1.0768e-29
ACAP1	ENSG00000072818	103.301	160.708	45.8942	0.285574	-1.80806	2.2967e-11	2.62934e-10
SIDT1	ENSG00000072858	33.8639	2.07793	65.6498	31.5938	4.98157	2.46547e-18	4.39002e-17
NDE1	ENSG00000072864	1126.71	1531.4	722.016	0.471475	-1.08475	2.33861e-21	4.69286e-20
TMEM38A	ENSG00000072954	9.87908	18.553	1.20514	0.0649567	-3.94438	0.000446381	0.00233452
PVR	ENSG00000073008	1759.76	852.391	2667.13	3.129	1.6457	5.38096e-56	2.68636e-54
MCM2	ENSG00000073111	1545.97	2082.03	1009.92	0.485067	-1.04374	6.29462e-23	1.33114e-21
PANX2	ENSG00000073150	335.551	212.013	459.088	2.16538	1.11462	9.49883e-13	1.21274e-11
TP63	ENSG00000073282	8.44917	2.5374	14.361	5.65972	2.50073	0.00719131	0.029459
PDE8A	ENSG00000073417	326.403	158.253	494.553	3.12508	1.64389	2.22137e-24	4.99836e-23
CLCN4	ENSG00000073464	836.889	1152.94	520.836	0.451745	-1.14642	7.66563e-21	1.51212e-19
GSDMB	ENSG00000073605	26.779	37.8056	15.7524	0.416668	-1.26303	0.0110507	0.043063
PPP2R3A	ENSG00000073711	139.605	75.0447	204.165	2.72058	1.44391	9.00901e-11	9.88992e-10
FERMT2	ENSG00000073712	281.026	124.527	437.525	3.51351	1.81291	1.0535e-26	2.56032e-25
DHRS9	ENSG00000073737	1570.52	2637.81	503.219	0.190771	-2.39009	2.46302e-59	1.31307e-57
PTGS2	ENSG00000073756	307.836	27.4672	588.206	21.4149	4.42054	6.03723e-106	6.39875e-104
IGF2BP2	ENSG00000073792	832.163	1126.05	538.28	0.478026	-1.06484	1.17034e-18	2.12066e-17
MAP3K13	ENSG00000073803	318.585	197.723	439.447	2.22254	1.15221	1.50104e-12	1.88575e-11
TBX21	ENSG00000073861	15.0406	4.02818	26.0531	6.4677	2.69325	0.000173957	0.000970589
NSF	ENSG00000073969	1969.29	1262.97	2675.61	2.1185	1.08304	3.50059e-16	5.56531e-15
TEAD2	ENSG00000074219	20.5896	31.7966	9.38261	0.295083	-1.76081	0.00391016	0.0170286
MGLL	ENSG00000074416	983.33	235.656	1731	7.34548	2.87686	3.8679e-119	4.96672e-117
NUAK1	ENSG00000074590	728.145	265.073	1191.22	4.49392	2.16797	2.73437e-63	1.57737e-61
SCARF1	ENSG00000074660	118.837	65.2727	172.402	2.64125	1.40122	1.01428e-08	9.38034e-08
TUBE1	ENSG00000074935	197.139	275.131	119.147	0.433057	-1.20737	1.39993e-09	1.39414e-08
TXK	ENSG00000074966	74.3882	114.101	34.6754	0.303901	-1.71833	4.82285e-08	4.16064e-07
KCNQ2	ENSG00000075043	11.6636	0	23.3273	#DIV/0!	#DIV/0!	1.63178e-08	1.47991e-07
TIPIN	ENSG00000075131	139.007	90.0901	187.924	2.08596	1.06071	1.20582e-05	7.92867e-05
GTSE1	ENSG00000075218	316.884	475.182	158.586	0.333738	-1.58321	1.10947e-20	2.18048e-19
SEMA3C	ENSG00000075223	48.3676	4.18643	92.5487	22.1068	4.46642	3.16551e-13	4.15671e-12
GRAMD4	ENSG00000075240	2323.77	3194.45	1453.1	0.454883	-1.13643	3.33382e-30	9.03991e-29
FOSL2	ENSG00000075426	5618.03	2136.7	9099.35	4.25859	2.09038	2.64397e-111	3.05705e-109
WDR62	ENSG00000075702	192.62	271.787	113.452	0.417431	-1.26039	1.27765e-09	1.27808e-08
SEC31B	ENSG00000075826	89.027	122.806	55.2483	0.449884	-1.15237	3.75447e-05	0.000231322
ARHGAP15	ENSG00000075884	444.206	619.874	268.537	0.433213	-1.20685	1.69469e-16	2.74491e-15
EXOSC7	ENSG00000075914	258.787	352.115	165.458	0.469897	-1.08958	5.38459e-10	5.56137e-09
RBMS2	ENSG00000076067	73.1211	45.2137	101.028	2.23447	1.15993	0.000426378	0.00223647
BAZ2A	ENSG00000076108	2860.28	1891.39	3829.16	2.02452	1.01758	7.89194e-26	1.85714e-24
ACACB	ENSG00000076555	71.2469	96.9722	45.5216	0.46943	-1.09102	0.000591186	0.00303537
GPC4	ENSG00000076716	1357.95	841.088	1874.82	2.22904	1.15642	3.17629e-14	4.47208e-13
CAMSAP3	ENSG00000076826	66.8178	104.125	29.5108	0.283417	-1.819	6.09232e-08	5.20703e-07
RAP1GAP	ENSG00000076864	29.2073	44.3406	14.0739	0.317405	-1.6556	0.00104532	0.00512097
TOP2B	ENSG00000077097	1260.89	1822.08	699.693	0.384007	-1.38079	1.23149e-18	2.22543e-17
NFKB2	ENSG00000077150	4815.1	988.113	8642.09	8.74605	3.12863	1.40596e-186	3.6458e-184
UBE2T	ENSG00000077152	220.284	301.537	139.032	0.461079	-1.11691	9.35083e-09	8.68398e-08
MAP2	ENSG00000078018	37.9476	15.6686	60.2266	3.84379	1.94253	3.54603e-06	2.50824e-05
AMPH	ENSG00000078053	22.7595	2.37915	43.1399	18.1325	4.1805	9.14255e-11	1.00324e-09
LAMP3	ENSG00000078081	1243.46	3.13982	2483.78	791.057	9.62764	0	0
PPP2R5C	ENSG00000078304	2517.15	1474.96	3559.33	2.41317	1.27093	8.48261e-30	2.27701e-28
HOXA9	ENSG00000078399	390.016	546.857	233.174	0.426389	-1.22976	4.30116e-15	6.34344e-14
EDN1	ENSG00000078401	189.165	1.63375	376.696	230.571	7.84907	8.44172e-109	9.39458e-107
PCM1	ENSG00000078674	1503.56	2031.5	975.617	0.480244	-1.05816	2.07132e-18	3.71045e-17
TNRC6C	ENSG00000078687	140.905	202.317	79.4937	0.392916	-1.34771	3.04272e-09	2.95735e-08
TP73	ENSG00000078900	351.416	513.084	189.747	0.369816	-1.43512	1.0664e-18	1.93759e-17
RUNX1T1	ENSG00000079102	8.09827	0.44418	15.7524	35.4639	5.14828	3.85199e-05	0.000236893
SLC1A3	ENSG00000079215	596.469	216.562	976.377	4.50854	2.17266	9.82135e-35	3.05376e-33
RAPGEF3	ENSG00000079337	41.0863	23.1225	59.05	2.55379	1.35264	0.000664937	0.0033796
CEACAM1	ENSG00000079385	27.134	4.7583	49.5096	10.4049	3.37919	5.28129e-10	5.46101e-09
FDFT1	ENSG00000079459	6284.5	8734.46	3834.55	0.439014	-1.18766	2.59471e-39	9.08284e-38
PAFAH1B3	ENSG00000079462	128.967	186.358	71.5747	0.38407	-1.38056	2.25295e-08	2.01859e-07
EPB41L2	ENSG00000079819	1444.27	944.987	1943.54	2.05669	1.04032	1.27168e-08	1.16639e-07
RIMS1	ENSG00000079841	7.92556	1.93497	13.9162	7.19193	2.84638	0.00370992	0.0162174
MOXD1	ENSG00000079931	45.3585	14.6372	76.0798	5.19769	2.37787	1.59209e-09	1.58197e-08
RAB21	ENSG00000080371	818.382	540.464	1096.3	2.02844	1.02037	7.88959e-17	1.30237e-15
SLC4A4	ENSG00000080493	21.3956	4.31412	38.4771	8.91888	3.15686	2.07022e-07	1.67556e-06
SMARCA2	ENSG00000080503	2105.35	2893.89	1316.8	0.45503	-1.13597	6.18499e-23	1.30899e-21
SESN1	ENSG00000080546	602.507	844.672	360.341	0.426604	-1.22903	9.42875e-16	1.45065e-14
COL5A3	ENSG00000080573	157.889	43.4675	272.311	6.26469	2.64724	1.01526e-30	2.7869e-29
NDC80	ENSG00000080986	141.021	196.911	85.1316	0.432336	-1.20977	5.64018e-08	4.84384e-07
CXCL2	ENSG00000081041	1089.37	10.1801	2168.56	213.018	7.73483	0	0
ATP8B1	ENSG00000081923	30.4277	44.3712	16.4842	0.371507	-1.42854	0.00360524	0.0158141
IL12RB2	ENSG00000081985	151.272	92.8982	209.645	2.25672	1.17423	8.38314e-08	7.08337e-07
STRADB	ENSG00000082146	505.924	725.578	286.27	0.394541	-1.34175	1.33817e-09	1.33612e-08
FAM135A	ENSG00000082269	112.39	46.352	178.427	3.8494	1.94463	4.99213e-14	6.90496e-13
EPB41L3	ENSG00000082397	293.476	46.5921	540.359	11.5977	3.53576	1.11943e-52	5.25463e-51
DLG3	ENSG00000082458	186.087	347.168	25.0057	0.0720277	-3.7953	3.91189e-51	1.79833e-49
BCKDHB	ENSG00000083123	172.303	236.519	108.086	0.456988	-1.12977	1.07246e-07	8.95979e-07
RRAGB	ENSG00000083750	91.7869	124.71	58.8637	0.472005	-1.08313	0.00010467	0.000605248
CYLD	ENSG00000083799	2050.68	552.825	3548.53	6.4189	2.68233	4.36976e-140	6.98873e-138
ZNF416	ENSG00000083817	51.7358	70.317	33.1547	0.471503	-1.08466	0.00294843	0.0131953
SMAP2	ENSG00000084070	51177.7	30774.8	71580.7	2.32595	1.21782	1.19951e-45	4.83953e-44
HAL	ENSG00000084110	52.7931	101.368	4.218	0.0416107	-4.5869	2.45911e-19	4.63844e-18
SSH1	ENSG00000084112	2189.27	1202.06	3176.49	2.64253	1.40192	4.89576e-45	1.94874e-43
NKAIN1	ENSG00000084628	220.36	45.6884	395.032	8.64621	3.11207	2.07819e-38	7.07991e-37
KIF3C	ENSG00000084731	231.395	349.726	113.065	0.323295	-1.62908	1.79968e-17	3.06164e-16
CD59	ENSG00000085063	1035.37	592.54	1478.19	2.49467	1.31885	4.30573e-31	1.19296e-29
HACE1	ENSG00000085382	94.9134	129.672	60.1544	0.463895	-1.10813	2.33472e-05	0.00014833
PILRA	ENSG00000085514	425.193	74.7282	775.659	10.3797	3.3757	4.31201e-96	4.01287e-94
WNT11	ENSG00000085741	37.3041	13.6212	60.987	4.47736	2.16265	1.08974e-06	8.14382e-06
TTC39A	ENSG00000085831	42.1655	14.3055	70.0256	4.89503	2.29132	4.0494e-08	3.52183e-07
DNAJA1	ENSG00000086061	5915.64	2832.61	8998.67	3.17681	1.66758	5.53003e-57	2.78682e-55
B4GALT1	ENSG00000086062	6980.11	1874.04	12086.2	6.44925	2.68913	3.08879e-135	4.7413e-133
CHMP5	ENSG00000086065	2862.71	1621.09	4104.34	2.53184	1.34019	6.38146e-28	1.60947e-26
SNX10	ENSG00000086300	127.446	43.7993	211.094	4.81957	2.2689	1.43768e-13	1.92863e-12
ERO1LB	ENSG00000086619	128.877	85.5261	172.229	2.01376	1.00989	0.00712805	0.0292447
LAT2	ENSG00000086730	10939.5	15476.7	6402.24	0.41367	-1.27345	2.46419e-47	1.03484e-45
HUWE1	ENSG00000086758	6868.24	4185.6	9550.88	2.28184	1.1902	1.62403e-39	5.72244e-38
PPP1R15A	ENSG00000087074	6163.08	3395.35	8930.82	2.63031	1.39523	4.08954e-53	1.95049e-51
ACHE	ENSG00000087085	16.6827	6.42261	26.9427	4.19497	2.06866	0.0015107	0.0071637
CETP	ENSG00000087237	13.8434	4.20171	23.485	5.58939	2.48269	0.00159957	0.0075522
MMP2	ENSG00000087245	1276.92	689.906	1863.93	2.70171	1.43387	1.69253e-31	4.76352e-30
SH3BP2	ENSG00000087266	3470.43	2292.26	4648.61	2.02796	1.02003	7.29094e-28	1.83711e-26
GMCL1	ENSG00000087338	305.009	460.397	149.62	0.32498	-1.62158	5.45004e-19	1.00598e-17
PHACTR3	ENSG00000087495	300.647	547.796	53.4976	0.0976597	-3.35609	7.95339e-65	4.75229e-63
TFAP2C	ENSG00000087510	94.166	29.2286	159.103	5.44341	2.44451	1.38797e-08	1.26826e-07
TPX2	ENSG00000088325	776.213	1045.12	507.305	0.485403	-1.04274	3.05826e-17	5.15676e-16
CRLS1	ENSG00000088766	218.711	309.45	127.971	0.413544	-1.27389	9.32825e-11	1.02236e-09
SMOX	ENSG00000088826	1815.07	295.257	3334.89	11.2949	3.4976	7.88272e-211	2.53662e-208
SIGLEC1	ENSG00000088827	2628.66	534.057	4723.27	8.84412	3.14472	1.0705e-195	3.0744e-193
EBF4	ENSG00000088881	25.1386	9.7054	40.5718	4.18033	2.06362	9.20692e-05	0.000536565
LZTS3	ENSG00000088899	31.0922	10.4508	51.7336	4.95021	2.30749	9.88868e-07	7.41901e-06
PLK1S1	ENSG00000088970	85.6118	118.099	53.1251	0.449836	-1.15253	6.78345e-05	0.000402084
P2RX7	ENSG00000089041	39.6729	7.32626	72.0195	9.83033	3.29724	5.55889e-13	7.2004e-12
RBBP9	ENSG00000089050	41.6834	26.497	56.8697	2.14627	1.10183	0.0114281	0.0443525
DZANK1	ENSG00000089091	124.009	172.011	76.0075	0.441875	-1.17829	6.75636e-07	5.19596e-06
OAS1	ENSG00000089127	8269.39	1777.57	14761.2	8.30415	3.05383	3.03265e-228	1.19116e-225
HEPH	ENSG00000089472	21.6684	6.27965	37.0571	5.90115	2.561	1.09135e-05	7.22043e-05
KCNH4	ENSG00000089558	36.3607	20.4574	52.264	2.55477	1.35319	0.00252464	0.0114639
GMIP	ENSG00000089639	2968.13	1907.24	4029.01	2.11248	1.07894	1.21226e-29	3.23458e-28
BIRC5	ENSG00000089685	196.774	287.828	105.72	0.367302	-1.44496	1.94119e-12	2.40926e-11
LAG3	ENSG00000089692	124.298	16.5264	232.07	14.0424	3.81172	2.68339e-32	7.78185e-31
ZBTB25	ENSG00000089775	132.978	78.2762	187.681	2.39767	1.26163	5.51706e-08	4.74116e-07
PCBP4	ENSG00000090097	428.072	596.845	259.299	0.43445	-1.20274	7.69246e-14	1.04986e-12
RGS1	ENSG00000090104	6862.75	847.112	12878.4	15.2027	3.92626	3.84547e-182	9.51005e-180
YPEL3	ENSG00000090238	331.361	532.699	130.022	0.244082	-2.03456	1.1139e-32	3.26576e-31
ICAM1	ENSG00000090339	10739.1	1353.37	20124.7	14.8701	3.89435	4.14318e-93	3.67642e-91
IRAK3	ENSG00000090376	799.13	1075.95	522.313	0.485445	-1.04262	1.63722e-17	2.78703e-16
TFAP4	ENSG00000090447	126.547	226.022	27.072	0.119776	-3.0616	2.63821e-19	4.95875e-18
LEPREL1	ENSG00000090530	768.291	17.92	1518.66	84.7467	6.40508	3.2192e-279	1.65349e-276
CERS4	ENSG00000090661	267.225	408	126.45	0.309928	-1.69	3.0371e-16	4.84286e-15
EFNB1	ENSG00000090776	251.58	373.324	129.836	0.347784	-1.52374	1.77105e-16	2.86165e-15
AARS	ENSG00000090861	1992.76	3129.59	855.926	0.273494	-1.87042	4.13788e-72	2.72885e-70
KIF4A	ENSG00000090889	241.961	364.072	119.851	0.329195	-1.60299	1.23261e-17	2.10766e-16
FCGBP	ENSG00000090920	31.6782	10.8339	52.5225	4.848	2.27739	2.76526e-07	2.20404e-06
NRCAM	ENSG00000091129	92.744	15.9851	169.503	10.6038	3.40651	9.2307e-10	9.35292e-09
LAMB1	ENSG00000091136	130.962	36.3966	225.527	6.19636	2.63142	8.68759e-27	2.12099e-25
ABCC6	ENSG00000091262	291.672	181.528	401.816	2.21352	1.14634	2.10175e-11	2.41443e-10
MYH7	ENSG00000092054	4.53354	0	9.06707	#DIV/0!	#DIV/0!	0.000882709	0.0043871
TGM1	ENSG00000092295	43.8797	15.3673	72.3921	4.71077	2.23596	3.09843e-08	2.73122e-07
TINF2	ENSG00000092330	1223.44	710.46	1736.41	2.44407	1.28928	1.8129e-31	5.09156e-30
DAZL	ENSG00000092345	19.6612	1.792	37.5305	20.9433	4.38842	1.13657e-09	1.14467e-08
WDR76	ENSG00000092470	151.141	206.417	95.8639	0.464417	-1.10651	7.88005e-06	5.31083e-05
TBX15	ENSG00000092607	377.412	158.554	596.269	3.76067	1.91099	8.38825e-35	2.61121e-33
PHGDH	ENSG00000092621	3003.09	5667.97	338.206	0.0596696	-4.06686	2.98555e-286	1.59482e-283
COL9A3	ENSG00000092758	38.8943	62.7965	14.992	0.23874	-2.06649	2.29883e-06	1.66304e-05
TEKT2	ENSG00000092850	7.25891	1.64904	12.8688	7.80382	2.96418	0.00790361	0.0320379
RFFL	ENSG00000092871	88.2836	51.3503	125.217	2.43848	1.28598	0.000549502	0.00283278
CECR1	ENSG00000093072	271.198	142.171	400.225	2.8151	1.49319	3.82247e-18	6.75675e-17
CDC6	ENSG00000094804	329.902	479.884	179.92	0.374923	-1.41533	2.5137e-17	4.25195e-16
SH2D3C	ENSG00000095370	188.567	270.439	106.695	0.394524	-1.34181	9.88314e-11	1.08007e-09
BLNK	ENSG00000095585	17.0285	2.39443	31.6625	13.2234	3.72502	5.97938e-07	4.62774e-06
SORBS1	ENSG00000095637	13.1958	5.94787	20.4437	3.43714	1.78121	0.010199	0.040172
BAMBI	ENSG00000095739	34.4607	17.7618	51.1596	2.88032	1.52623	0.000457271	0.0023882
IL11	ENSG00000095752	26.3659	7.31097	45.4209	6.2127	2.63522	6.814e-07	5.23577e-06
CREM	ENSG00000095794	1677.79	243.329	3112.25	12.7903	3.67698	1.49209e-169	3.04214e-167
HIVEP1	ENSG00000095951	340.043	131.133	548.953	4.18624	2.06566	3.98033e-36	1.27471e-34
FKBP5	ENSG00000096060	1982.66	1085.8	2879.51	2.65197	1.40707	1.73131e-43	6.71138e-42
BRPF3	ENSG00000096070	1389.28	847.719	1930.84	2.27768	1.18757	1.96165e-28	5.02818e-27
TMEM14A	ENSG00000096092	179.123	241.15	117.096	0.485575	-1.04223	1.01582e-06	7.61266e-06
EFHC1	ENSG00000096093	101.658	140.966	62.3499	0.442305	-1.17689	1.09122e-05	7.22043e-05
JAK2	ENSG00000096968	817.084	360.646	1273.52	3.53122	1.82017	1.94409e-48	8.42932e-47
IL12RB1	ENSG00000096996	518.136	335.059	701.213	2.09281	1.06544	5.95254e-15	8.70681e-14
PCSK5	ENSG00000099139	17.9173	6.45318	29.3815	4.55303	2.18683	0.00121098	0.00586264
SCD	ENSG00000099194	4167.83	6094.99	2240.67	0.367625	-1.44369	9.13068e-53	4.30108e-51
NRP1	ENSG00000099250	3936.76	2487.11	5386.41	2.16573	1.11485	1.24349e-32	3.63373e-31
H2AFY2	ENSG00000099284	43.3605	26.3082	60.4129	2.29636	1.19935	0.00292251	0.0130925
EFNA2	ENSG00000099617	24.9983	38.8063	11.1903	0.288363	-1.79404	0.00139448	0.00666162
RASSF7	ENSG00000099849	226.972	347.25	106.695	0.307257	-1.70248	1.63568e-18	2.94191e-17
GADD45B	ENSG00000099860	1182.28	314.836	2049.73	6.51046	2.70276	1.53673e-116	1.89145e-114
PALM	ENSG00000099864	52.2907	78.7717	25.8098	0.327653	-1.60976	0.00528381	0.0223512
SERPIND1	ENSG00000099937	7.40187	1.93497	12.8688	6.65064	2.73349	0.00778555	0.0315977
BCL2L13	ENSG00000099968	2442.33	1136.77	3747.89	3.29696	1.72114	1.85737e-67	1.14043e-65
OSM	ENSG00000099985	574.601	119.426	1029.78	8.62273	3.10815	4.12522e-99	4.05075e-97
CABIN1	ENSG00000099991	1680.46	2329.77	1031.16	0.4426	-1.17592	1.19045e-28	3.07205e-27
GGT5	ENSG00000099998	42.8357	11.0838	74.5876	6.72943	2.75048	1.28809e-10	1.39569e-09
SEC14L2	ENSG00000100003	113.497	52.8411	174.152	3.29577	1.72062	3.38543e-12	4.13828e-11
UPB1	ENSG00000100024	19.8121	2.25146	37.3727	16.5993	4.05305	9.63217e-09	8.92664e-08
MFNG	ENSG00000100060	464.505	732.95	196.06	0.267494	-1.90242	6.22983e-36	1.99034e-34
HIRA	ENSG00000100084	313.045	181.12	444.971	2.45677	1.29677	1.66616e-15	2.52705e-14
CENPM	ENSG00000100162	154.922	227.237	82.6073	0.363529	-1.45986	1.28085e-10	1.3884e-09
43711	ENSG00000100167	60.7824	88.2523	33.3125	0.377468	-1.40557	3.54326e-05	0.000219017
KDELR3	ENSG00000100196	62.9089	94.4708	31.347	0.331816	-1.59154	3.01669e-06	2.15148e-05
RTCB	ENSG00000100220	3344.14	1312.12	5376.16	4.0973	2.03467	2.35083e-97	2.22654e-95
JOSD1	ENSG00000100221	2683.19	1345.52	4020.86	2.98834	1.57934	3.4427e-58	1.78546e-56
GTPBP1	ENSG00000100226	3069.08	1254.44	4883.72	3.89315	1.96094	1.31067e-89	1.09739e-87
TTLL1	ENSG00000100271	108.629	162.01	55.2483	0.341017	-1.55208	4.03451e-09	3.87478e-08
BIK	ENSG00000100290	1068.76	1813.55	323.974	0.17864	-2.48487	9.6496e-62	5.44886e-60
HMOX1	ENSG00000100292	4382.8	811.471	7954.13	9.80211	3.29309	2.50122e-56	1.25338e-54
MCAT	ENSG00000100294	442.884	631.52	254.249	0.402598	-1.31259	1.22009e-18	2.20633e-17
PDGFB	ENSG00000100311	7.6249	1.04661	14.2032	13.5707	3.76242	0.00273368	0.0123286
APOL4	ENSG00000100336	4.98543	0.301214	9.66965	32.1023	5.0046	0.00230199	0.0105335
APOL1	ENSG00000100342	3119.87	482.794	5756.95	11.9242	3.57583	3.66077e-252	1.65721e-249
PNPLA3	ENSG00000100344	118.292	183.56	53.0243	0.288866	-1.79153	1.4327e-12	1.80415e-11
CACNA1I	ENSG00000100346	36.0383	0	72.0766	#DIV/0!	#DIV/0!	6.37433e-25	1.4539e-23
FOXRED2	ENSG00000100350	288.441	425.915	150.968	0.354455	-1.49633	5.84743e-18	1.02078e-16
KIAA0930	ENSG00000100364	8160.88	11222.3	5099.51	0.454411	-1.13793	6.32972e-37	2.06929e-35
CSF2RB	ENSG00000100368	1320.02	442.476	2197.56	4.96651	2.31223	1.32043e-59	7.06762e-58
IL2RB	ENSG00000100385	227.569	309.578	145.56	0.470188	-1.08869	1.22381e-08	1.12558e-07
PMM1	ENSG00000100417	180.709	246.101	115.317	0.468576	-1.09364	8.46997e-08	7.15447e-07
CDKL1	ENSG00000100490	82.2152	48.7977	115.633	2.36964	1.24467	1.00618e-05	6.68176e-05
PYGL	ENSG00000100504	5169.58	7633.59	2705.58	0.35443	-1.49643	1.70166e-59	9.08994e-58
TRIM9	ENSG00000100505	88.2631	130.244	46.282	0.355348	-1.4927	3.4801e-07	2.74837e-06
DDHD1	ENSG00000100523	157.631	101.24	214.021	2.11399	1.07997	4.12851e-07	3.2403e-06
CDKN3	ENSG00000100526	114.327	165.314	63.3403	0.383152	-1.38401	2.84056e-05	0.000178346
PSMA3	ENSG00000100567	1553.34	959.763	2146.91	2.23691	1.16151	2.1976e-28	5.62758e-27
RIN3	ENSG00000100599	889.83	443.998	1335.66	3.00826	1.58893	1.14759e-18	2.08226e-17
LGMN	ENSG00000100600	150.396	14.4637	286.327	19.7963	4.30716	1.55969e-58	8.18426e-57
HIF1A	ENSG00000100644	2816.53	937.013	4696.04	5.01172	2.3253	8.59712e-53	4.0569e-51
KIAA0247	ENSG00000100647	5197.42	1765.38	8629.45	4.88815	2.28929	1.08481e-130	1.57469e-128
ARHGAP5	ENSG00000100852	77.9087	35.6512	120.166	3.37061	1.75301	2.21811e-09	2.17967e-08
PCK2	ENSG00000100889	789.992	1242.27	337.717	0.271856	-1.87909	2.88879e-48	1.24849e-46
PSMA6	ENSG00000100902	157.6	99.2138	215.986	2.17698	1.12233	8.0869e-08	6.84389e-07
NFKBIA	ENSG00000100906	4838.7	832.464	8844.93	10.625	3.40939	1.5622e-255	7.32012e-253
PSME2	ENSG00000100911	3794.93	2342.72	5247.14	2.23976	1.16335	5.6246e-35	1.75911e-33
MMP9	ENSG00000100985	11736.5	3037.48	20435.5	6.72777	2.75013	1.15059e-104	1.19113e-102
ABHD12	ENSG00000100997	2447.32	1615.25	3279.38	2.03027	1.02167	9.687e-14	1.31268e-12
PROCR	ENSG00000101000	287.07	142.855	431.285	3.01904	1.59409	2.71779e-21	5.44149e-20
CD40	ENSG00000101017	3075.17	473.88	5676.47	11.9787	3.5824	2.63628e-253	1.21401e-250
RIMS4	ENSG00000101098	27.4644	42.5333	12.3955	0.29143	-1.77878	0.000964127	0.00475811
CTSZ	ENSG00000101160	5220.28	3002.01	7438.54	2.47785	1.30909	3.19596e-46	1.30721e-44
NTSR1	ENSG00000101188	2142.05	3685.85	598.25	0.16231	-2.62318	5.92545e-131	8.64824e-129
C20orf27	ENSG00000101220	243.019	336.447	149.591	0.444622	-1.16935	4.24583e-10	4.42803e-09
CDC25B	ENSG00000101224	254.386	350.574	158.199	0.451255	-1.14798	2.09986e-10	2.2452e-09
NDUFAF5	ENSG00000101247	83.5155	116.373	50.6578	0.435304	-1.1999	8.89648e-05	0.000519379
TRIB3	ENSG00000101255	2158.77	3222.07	1095.47	0.33999	-1.55644	3.6416e-52	1.69744e-50
SIRPB1	ENSG00000101307	318.385	514.581	122.189	0.237453	-2.07429	8.31961e-33	2.44993e-31
FERMT1	ENSG00000101311	17.6666	5.24832	30.0848	5.73227	2.51911	0.000704167	0.00356464
HCK	ENSG00000101336	1961.95	1196.84	2727.05	2.27854	1.18811	2.55224e-31	7.13052e-30
SAMHD1	ENSG00000101347	6692.77	3420.78	9964.75	2.91301	1.54251	1.04116e-64	6.20724e-63
PAK7	ENSG00000101349	15.1117	24.1691	6.05422	0.250494	-1.99715	0.00655918	0.0271822
MANBAL	ENSG00000101363	694.312	419.058	969.566	2.31368	1.21019	5.13404e-18	8.99771e-17
JAG1	ENSG00000101384	657.021	214.213	1099.83	5.13428	2.36016	8.14805e-69	5.1086e-67
E2F1	ENSG00000101412	464.904	624.127	305.68	0.489772	-1.02982	4.84401e-13	6.305e-12
CHMP4B	ENSG00000101421	3473.27	2231.95	4714.6	2.11233	1.07883	1.16448e-29	3.11022e-28
BPI	ENSG00000101425	13.7347	4.0129	23.4565	5.84528	2.54727	0.000306702	0.00164757
PPP1R16B	ENSG00000101445	1197.38	293.225	2101.53	7.16697	2.84136	1.53931e-107	1.68498e-105
FAM83D	ENSG00000101447	88.3392	129.693	46.9853	0.362281	-1.46482	0.00010733	0.000619687
RBFA	ENSG00000101546	272.034	363.833	180.235	0.495379	-1.0134	1.20328e-08	1.10708e-07
MYOM1	ENSG00000101605	60.8995	24.1997	97.5993	4.03309	2.01188	2.76956e-09	2.70367e-08
SMAD7	ENSG00000101665	1739.89	825.261	2654.52	3.21658	1.68553	1.42828e-58	7.50944e-57
TLR8	ENSG00000101916	38.698	5.53425	71.8618	12.9849	3.69876	1.27006e-14	1.83263e-13
XIAP	ENSG00000101966	821.957	499.152	1144.76	2.29341	1.1975	2.91753e-23	6.23395e-22
PLP2	ENSG00000102007	4392.22	5858.68	2925.77	0.499391	-1.00176	1.3799e-17	2.35499e-16
FMR1	ENSG00000102081	380.272	163.072	597.472	3.66385	1.87336	7.25575e-19	1.32827e-17
PIM2	ENSG00000102096	2903.45	930.223	4876.67	5.24247	2.39025	1.08336e-47	4.61491e-46
MAGT1	ENSG00000102158	1461.4	948.696	1974.1	2.08085	1.05717	7.03478e-12	8.43321e-11
UBL4A	ENSG00000102178	809.757	1083.3	536.216	0.494984	-1.01455	2.90635e-16	4.64269e-15
KLHL4	ENSG00000102271	41.2361	68.7138	13.7584	0.200227	-2.32029	2.2139e-07	1.78482e-06
KLF8	ENSG00000102349	19.972	31.9243	8.0197	0.25121	-1.99303	0.00173303	0.00813061
SRPX2	ENSG00000102359	47.3449	14.0195	80.6703	5.75414	2.5246	9.39858e-11	1.02838e-09
TNFSF13B	ENSG00000102524	834.34	43.6258	1625.05	37.2499	5.21916	2.97509e-245	1.28164e-242
MLNR	ENSG00000102539	31.3411	55.5521	7.1301	0.12835	-2.96185	2.33453e-08	2.0826e-07
ACP5	ENSG00000102575	149.752	51.3656	248.137	4.83081	2.27226	1.18745e-23	2.5848e-22
SGCG	ENSG00000102683	18.9723	2.5374	35.4072	13.9541	3.80262	3.36274e-08	2.94961e-07
FLT1	ENSG00000102755	100.649	54.189	147.109	2.71474	1.44081	3.07337e-08	2.71181e-07
IRG1	ENSG00000102794	580.653	0.44418	1160.86	2613.5	11.3518	2.74011e-188	7.24609e-186
TRADD	ENSG00000102871	827.315	251.529	1403.1	5.5783	2.47983	2.25705e-85	1.76267e-83
CORO1A	ENSG00000102879	15360	21952.7	8767.34	0.399375	-1.32419	4.74575e-52	2.20826e-50
N4BP1	ENSG00000102921	1859.16	705.513	3012.8	4.27037	2.09436	5.80297e-88	4.68252e-86
DHODH	ENSG00000102967	87.5154	117.271	57.7593	0.492527	-1.02172	0.000453297	0.00236883
HAS3	ENSG00000103044	28.371	39.1534	17.5886	0.449223	-1.1545	0.0125798	0.0483376
FA2H	ENSG00000103089	27.7687	41.2772	14.2602	0.345474	-1.53335	0.00679791	0.0280367
AXIN1	ENSG00000103126	917.491	1264.11	570.876	0.451604	-1.14687	4.49934e-22	9.23696e-21
MPG	ENSG00000103152	2351.8	3508.3	1195.29	0.340705	-1.5534	3.02957e-53	1.44753e-51
NECAB2	ENSG00000103154	16.4368	29.5451	3.32839	0.112655	-3.15002	5.13404e-05	0.000309887
ZNF500	ENSG00000103199	196.123	272.941	119.305	0.43711	-1.19393	1.84769e-09	1.82778e-08
FOXF1	ENSG00000103241	26.7242	9.26122	44.1872	4.77121	2.25436	1.16596e-05	7.67981e-05
HAGHL	ENSG00000103253	226.015	318.134	133.896	0.42088	-1.24852	6.02606e-11	6.68397e-10
MEFV	ENSG00000103313	800.48	225.016	1375.94	6.11486	2.61232	2.16113e-92	1.90501e-90
USP31	ENSG00000103404	1064.02	1466.28	661.759	0.451318	-1.14778	5.97304e-24	1.3152e-22
PYCARD	ENSG00000103490	910.383	1291.54	529.228	0.409766	-1.28713	5.30229e-27	1.30045e-25
MAZ	ENSG00000103495	1124.75	1514.55	734.946	0.485257	-1.04318	2.22037e-05	0.000141571
SYT17	ENSG00000103528	62.8276	27.9266	97.7286	3.49948	1.80714	3.24496e-08	2.85192e-07
AQP9	ENSG00000103569	17.4091	0.745394	34.0728	45.7111	5.51447	2.77759e-10	2.9346e-09
LACTB	ENSG00000103642	1556.53	559.774	2553.29	4.56128	2.18944	9.35852e-90	7.88507e-88
CORO2B	ENSG00000103647	159.002	222.944	95.0598	0.426385	-1.22977	2.7813e-08	2.46633e-07
TRIP4	ENSG00000103671	389.886	252.84	526.932	2.08405	1.05939	5.5222e-12	6.67085e-11
KIAA1199	ENSG00000103888	1006.32	231.439	1781.2	7.69621	2.94415	3.979e-125	5.4781e-123
HOMER2	ENSG00000103942	795.564	1194.88	396.25	0.331624	-1.59238	8.92033e-37	2.90199e-35
EHD4	ENSG00000103966	3152.86	1944.41	4361.31	2.24299	1.16543	1.27422e-34	3.93903e-33
TGM5	ENSG00000104055	921.451	1445.59	397.313	0.274845	-1.86331	2.27512e-51	1.0495e-49
TJP1	ENSG00000104067	18.7203	5.07479	32.3658	6.37777	2.67305	1.75586e-05	0.000113552
BMF	ENSG00000104081	1992.22	779.664	3204.77	4.11045	2.0393	1.05e-63	6.10989e-62
RHOV	ENSG00000104140	79.4662	36.7437	122.189	3.32544	1.73354	7.23905e-09	6.80562e-08
SLC30A4	ENSG00000104154	34.5927	11.8139	57.3716	4.85628	2.27985	7.80668e-07	5.93365e-06
MYEF2	ENSG00000104177	91.0697	142.012	40.127	0.28256	-1.82337	2.83525e-10	2.99315e-09
PDGFRL	ENSG00000104213	289.737	11.0379	568.437	51.4984	5.68646	2.02982e-129	2.89916e-127
FZD3	ENSG00000104290	49.7293	71.44	28.0186	0.392197	-1.35035	0.000222827	0.00122082
RIPK2	ENSG00000104312	1022.57	270.281	1774.86	6.56673	2.71517	5.87381e-112	6.91117e-110
NBN	ENSG00000104320	930.596	511.119	1350.07	2.64141	1.40131	6.0887e-17	1.01134e-15
TRPA1	ENSG00000104321	10.1993	2.83861	17.5601	6.18616	2.62904	0.00278035	0.0125165
PLAT	ENSG00000104368	21.0952	3.584	38.6063	10.7718	3.42919	7.27477e-08	6.17812e-07
GDAP1	ENSG00000104381	122.929	49.053	196.805	4.01208	2.00435	1.2357e-16	2.02109e-15
IL7	ENSG00000104432	195.906	5.8049	386.006	66.4966	6.05521	1.24115e-98	1.20545e-96
TRPS1	ENSG00000104447	523.697	263.144	784.25	2.98031	1.57546	2.87151e-30	7.80216e-29
GSDMD	ENSG00000104518	2527.01	1617.2	3436.82	2.12516	1.08757	4.48779e-28	1.13939e-26
ANXA13	ENSG00000104537	3.24951	0	6.49902	#DIV/0!	#DIV/0!	0.00747482	0.0304848
SQLE	ENSG00000104549	7079.28	4535.73	9622.84	2.12156	1.08513	2.53489e-34	7.75538e-33
ARHGEF10	ENSG00000104728	85.9382	122.367	49.5096	0.4046	-1.30543	7.20224e-06	4.87246e-05
BNIP3L	ENSG00000104765	799.916	431.541	1168.29	2.70726	1.43683	1.05394e-31	3.00424e-30
MAN2B1	ENSG00000104774	5625.45	3268.93	7981.96	2.44176	1.28792	7.2737e-46	2.94354e-44
MAP4K1	ENSG00000104814	44.5485	70.174	18.923	0.269658	-1.8908	4.43103e-06	3.09004e-05
RELB	ENSG00000104856	2402.23	721.534	4082.93	5.65868	2.50047	6.31607e-53	3.00171e-51
FCGRT	ENSG00000104870	3642.95	2158.97	5126.93	2.37471	1.24775	2.99006e-40	1.0763e-38
SLC17A7	ENSG00000104888	1210.48	568.459	1852.51	3.25883	1.70436	4.87869e-11	5.45666e-10
LYL1	ENSG00000104903	1281.5	2012.78	550.233	0.27337	-1.87107	6.29625e-60	3.39046e-58
TBC1D17	ENSG00000104946	1737.94	600.959	2874.92	4.78388	2.25818	1.35204e-98	1.30839e-96
IL4I1	ENSG00000104951	17868.6	1395.07	34342.1	24.6168	4.62157	1.61339e-295	1.00214e-292
LILRB1	ENSG00000104972	167.933	79.9253	255.94	3.20225	1.67908	1.44714e-07	1.19443e-06
MED25	ENSG00000104973	2092.34	1282.87	2901.8	2.26195	1.17757	1.0347e-14	1.50195e-13
CCNE1	ENSG00000105173	153.211	221.979	84.4435	0.380412	-1.39436	1.46375e-07	1.20665e-06
EBI3	ENSG00000105246	2082.65	88.4105	4076.9	46.1132	5.52711	7.14693e-76	4.99705e-74
SLC1A5	ENSG00000105281	2701.36	4252.61	1150.1	0.270447	-1.88658	1.91644e-78	1.37597e-76
PRKD2	ENSG00000105287	1684.43	857.292	2511.57	2.92966	1.55073	2.75637e-28	7.04497e-27
MYH14	ENSG00000105357	97.9794	144.641	51.3173	0.35479	-1.49496	3.87563e-08	3.3762e-07
ICAM5	ENSG00000105376	100.293	52.4581	148.128	2.82374	1.49761	1.40701e-08	1.28434e-07
CD33	ENSG00000105383	1279.51	1810.96	748.056	0.413071	-1.27554	3.39957e-30	9.1995e-29
NAPA	ENSG00000105402	6837.92	3904.58	9771.27	2.50251	1.32338	1.06204e-28	2.746e-27
RABAC1	ENSG00000105404	1053.73	637.632	1469.83	2.30513	1.20485	6.98584e-27	1.71022e-25
ATP1A3	ENSG00000105409	41.4396	56.4099	26.4694	0.469233	-1.09162	0.0101342	0.0399343
PLA2G4C	ENSG00000105499	361.516	107.265	615.766	5.74062	2.52121	2.12076e-53	1.01512e-51
RAB3D	ENSG00000105514	121.526	211.891	31.1607	0.14706	-2.76552	4.70559e-23	9.99059e-22
DBP	ENSG00000105516	68.0482	116.255	19.8411	0.170668	-2.55073	3.13011e-13	4.1163e-12
PLEKHA4	ENSG00000105559	517.821	107.311	928.331	8.65088	3.11285	9.10824e-74	6.20591e-72
MAST1	ENSG00000105613	23.8801	37.775	9.98518	0.264333	-1.91957	0.000784334	0.00393626
RAB3A	ENSG00000105649	35.4603	49.7166	21.204	0.426498	-1.22939	0.00495277	0.0210814
TFPI2	ENSG00000105825	2317.86	548.68	4087.04	7.44886	2.89702	2.22821e-167	4.44129e-165
BET1	ENSG00000105829	423.001	208.301	637.7	3.06143	1.61421	2.10716e-23	4.54239e-22
NAMPT	ENSG00000105835	2656.82	333.124	4980.52	14.951	3.90217	1.81682e-277	8.98622e-275
ITGB8	ENSG00000105855	190.82	8.51583	373.124	43.8154	5.45337	5.69579e-89	4.66653e-87
HBP1	ENSG00000105856	631.429	417.046	845.811	2.0281	1.02013	2.76991e-15	4.14231e-14
DFNA5	ENSG00000105928	274.758	127.6	421.915	3.30655	1.72533	2.57662e-23	5.52319e-22
ZC3HAV1	ENSG00000105939	3208.92	1332.76	5085.09	3.81547	1.93186	7.02094e-89	5.73463e-87
ADAP1	ENSG00000105963	404.896	559.718	250.074	0.446787	-1.16234	6.99196e-14	9.57192e-13
TFEC	ENSG00000105967	1258.58	348.756	2168.4	6.21752	2.63634	2.07711e-60	1.13683e-58
CAV1	ENSG00000105974	67.2193	23.1531	111.285	4.80651	2.26499	8.91425e-12	1.05818e-10
MET	ENSG00000105976	119.363	20.7739	217.952	10.4916	3.39116	6.58507e-35	2.05708e-33
DNAJB6	ENSG00000105993	4095.76	2510.61	5680.92	2.26277	1.17809	6.62107e-37	2.16189e-35
HOXA13	ENSG00000106031	133.248	190.861	75.635	0.396282	-1.3354	4.72976e-08	4.08561e-07
CHN2	ENSG00000106069	30.0854	15.5103	44.6605	2.87941	1.52577	0.000981173	0.00483598
GRB10	ENSG00000106070	767.598	1030.1	505.097	0.490338	-1.02815	7.64206e-17	1.26307e-15
NOD1	ENSG00000106100	235.878	139.22	332.537	2.38858	1.25615	6.74852e-12	8.1046e-11
GARS	ENSG00000106105	3083.18	4379.39	1786.97	0.40804	-1.29322	9.07753e-27	2.20812e-25
CASP2	ENSG00000106144	917.384	1320.26	514.51	0.389704	-1.35955	1.23171e-17	2.10748e-16
CCL24	ENSG00000106178	115.982	61.7859	170.178	2.75431	1.46169	2.94478e-09	2.86737e-08
HSPB1	ENSG00000106211	12574.4	16897.7	8250.98	0.488289	-1.03419	1.48949e-32	4.3431e-31
NPTX2	ENSG00000106236	673.643	396.329	950.957	2.39941	1.26268	8.02401e-24	1.75811e-22
USP42	ENSG00000106346	454.133	235.258	673.009	2.86073	1.51638	1.10655e-25	2.58572e-24
SERPINE1	ENSG00000106366	146.387	76.9742	215.8	2.80354	1.48725	3.8127e-11	4.29677e-10
C1GALT1	ENSG00000106392	249.453	159.698	339.209	2.12407	1.08683	2.59971e-10	2.75757e-09
GIMAP2	ENSG00000106560	477.136	132.118	822.153	6.22287	2.63758	4.26269e-69	2.69154e-67
TMEM176B	ENSG00000106565	45.8814	12.7994	78.9634	6.16931	2.62511	1.23298e-11	1.44755e-10
GLI3	ENSG00000106571	82.459	14.3513	150.567	10.4915	3.39115	1.802e-25	4.18156e-24
PSMA2	ENSG00000106588	47.9357	29.4327	66.4386	2.25731	1.1746	0.00160096	0.00755747
MRPL32	ENSG00000106591	634.836	410.174	859.497	2.09544	1.06726	3.01419e-16	4.8092e-15
BLVRA	ENSG00000106605	155.643	70.8528	240.433	3.39342	1.76274	1.28441e-15	1.96367e-14
PRKAG2	ENSG00000106617	1098.81	340.608	1857.01	5.45204	2.4468	8.46242e-96	7.79389e-94
LHX2	ENSG00000106689	217.213	107.025	327.401	3.05912	1.61312	6.66823e-17	1.10485e-15
FSD1L	ENSG00000106701	61.6504	28.815	94.4857	3.27905	1.71328	3.35352e-07	2.65154e-06
TRIM14	ENSG00000106785	3679.68	1196.33	6163.03	5.15162	2.36503	8.5176e-132	1.25689e-129
CORO2A	ENSG00000106789	192.062	263.154	120.97	0.459695	-1.12125	5.99896e-08	5.1404e-07
TGFBR1	ENSG00000106799	1932.98	3193.64	672.32	0.210518	-2.24798	1.54535e-97	1.46885e-95
TLE4	ENSG00000106829	1357.76	833.256	1882.27	2.25894	1.17564	1.24545e-27	3.10596e-26
AK1	ENSG00000106992	53.5286	80.2723	26.7849	0.333676	-1.58348	1.4209e-05	9.28121e-05
PLGRKT	ENSG00000107020	475.986	282.279	669.693	2.37246	1.24638	2.28274e-18	4.08097e-17
KANK1	ENSG00000107104	1670.91	2252.36	1089.46	0.483695	-1.04783	3.19829e-24	7.15438e-23
DDX58	ENSG00000107201	3517.62	389.835	6645.4	17.0467	4.09142	1.68163e-299	1.0694e-296
PIP5K1B	ENSG00000107242	30.333	44.6265	16.0394	0.359414	-1.47628	0.00282901	0.0127205
GLIS3	ENSG00000107249	264.931	90.5856	439.276	4.84929	2.27777	4.05241e-37	1.33295e-35
BAG1	ENSG00000107262	2490.13	1460.17	3520.08	2.41074	1.26947	3.24939e-37	1.07278e-35
SETX	ENSG00000107290	1499.76	967.068	2032.45	2.10166	1.07153	4.56653e-08	3.95485e-07
CCNJ	ENSG00000107443	327.239	134.905	519.572	3.85138	1.94537	1.61265e-31	4.55308e-30
ERLIN1	ENSG00000107566	1016.72	1568.74	464.698	0.296224	-1.75524	1.39496e-48	6.07796e-47
UNC5B	ENSG00000107731	1040.26	468.672	1611.84	3.43917	1.78206	6.73376e-53	3.18887e-51
CCSER2	ENSG00000107771	294.885	148.343	441.428	2.97572	1.57324	2.4166e-21	4.84571e-20
MINPP1	ENSG00000107789	381.966	247.96	515.971	2.08087	1.05718	4.0893e-12	4.97137e-11
LIPA	ENSG00000107798	4014.27	2642.78	5385.75	2.03791	1.02709	2.30816e-20	4.49662e-19
ARHGAP21	ENSG00000107863	774.809	354.429	1195.19	3.37216	1.75367	2.48753e-45	9.97591e-44
CPEB3	ENSG00000107864	102.414	29.9587	174.869	5.837	2.54523	7.78329e-21	1.5342e-19
MAP3K8	ENSG00000107968	275.729	109.93	441.528	4.01646	2.00592	2.20143e-30	6.00592e-29
EBF3	ENSG00000108001	43.8901	75.514	12.2662	0.162436	-2.62206	9.7828e-08	8.20889e-07
PPIF	ENSG00000108179	28377.9	17409	39346.8	2.26014	1.17641	1.3467e-35	4.27185e-34
TSPAN14	ENSG00000108219	5223.66	7454.15	2993.17	0.401543	-1.31637	7.46512e-47	3.1057e-45
MLLT6	ENSG00000108292	1689.96	501.357	2878.57	5.74155	2.52144	3.70343e-118	4.71023e-116
CSF3	ENSG00000108342	116.3	0	232.6	#DIV/0!	#DIV/0!	2.14251e-75	1.49022e-73
RGS9	ENSG00000108370	10.5653	2.83861	18.2919	6.44397	2.68795	0.00141182	0.00673339
RNF43	ENSG00000108375	8.46374	2.09322	14.8343	7.08683	2.82514	0.00437759	0.0188887
KPNB1	ENSG00000108424	5318.85	3252.94	7384.76	2.27018	1.18281	5.62458e-38	1.89203e-36
TRIM16L	ENSG00000108448	25.2041	11.5433	38.8649	3.36689	1.75142	0.00216822	0.00997604
ENO3	ENSG00000108515	95.2145	137.361	53.068	0.38634	-1.37206	4.10306e-05	0.000251235
BLMH	ENSG00000108578	586.081	377.51	794.652	2.10498	1.07381	4.91616e-16	7.73752e-15
ICAM2	ENSG00000108622	69.7727	46.4796	93.0658	2.00229	1.00165	0.00130524	0.0062746
CYTH1	ENSG00000108669	1877.87	1137.27	2618.47	2.30242	1.20315	1.30031e-29	3.45572e-28
LGALS3BP	ENSG00000108679	1186.26	251.769	2120.74	8.42339	3.0744	3.00574e-114	3.6326e-112
CCL7	ENSG00000108688	202.279	0.301214	404.256	1342.09	10.3903	3.04391e-82	2.29013e-80
CCL2	ENSG00000108691	2308.37	52.0499	4564.69	87.6984	6.45448	0	0
CCL8	ENSG00000108700	1217.26	1.18957	2433.34	2045.55	10.9983	0	0
CCL1	ENSG00000108702	653.136	44.6112	1261.66	28.2812	4.82177	1.89246e-139	2.97948e-137
DHX58	ENSG00000108771	2782.36	518.701	5046.02	9.7282	3.28217	3.30661e-215	1.11793e-212
DLX4	ENSG00000108813	75.95	112.376	39.5244	0.351717	-1.50751	1.16174e-06	8.65279e-06
ABCC3	ENSG00000108846	255.243	106.933	403.553	3.77389	1.91605	1.25755e-26	3.04514e-25
MPP2	ENSG00000108852	15.1751	25.3434	5.00684	0.19756	-2.33964	0.00147101	0.00698974
SLC9A3R1	ENSG00000109062	560.939	868.345	253.532	0.291972	-1.7761	5.96222e-36	1.90713e-34
TMEM104	ENSG00000109066	1086.84	1664.21	509.459	0.306126	-1.7078	9.25291e-48	3.94786e-46
CDR2L	ENSG00000109089	152.104	207.714	96.4949	0.464557	-1.10607	1.15359e-06	8.59689e-06
PMP22	ENSG00000109099	71.4407	45.9132	96.9683	2.11199	1.0786	0.000159446	0.000895801
GABRA4	ENSG00000109158	14.2724	24.1691	4.37577	0.181048	-2.46556	0.00242669	0.0110548
KIAA1211	ENSG00000109265	64.0306	35.5694	92.4917	2.60032	1.37869	2.88323e-05	0.000180813
NFKB1	ENSG00000109320	3727.03	938.765	6515.29	6.94029	2.795	1.20798e-174	2.56063e-172
AREG	ENSG00000109321	70.4511	11.6404	129.262	11.1046	3.47309	3.60797e-23	7.6969e-22
MANBA	ENSG00000109323	1209.01	598.978	1819.05	3.03692	1.60261	1.96113e-46	8.04605e-45
UBE2D3	ENSG00000109332	6364.02	4150.25	8577.79	2.06681	1.04741	8.05146e-27	1.96749e-25
MAPK10	ENSG00000109339	12.3233	1.34782	23.2988	17.2862	4.11155	5.08538e-06	3.51138e-05
TBC1D9	ENSG00000109436	44.345	20.9169	67.773	3.24011	1.69604	1.16205e-05	7.66352e-05
INPP4B	ENSG00000109452	328.959	439.235	218.684	0.497874	-1.00615	7.58457e-10	7.73487e-09
TRIM2	ENSG00000109654	143.336	225.971	60.7	0.268618	-1.89637	2.567e-15	3.84747e-14
SLC2A9	ENSG00000109667	235.023	316.567	153.479	0.484823	-1.04447	1.51935e-08	1.38216e-07
NEIL3	ENSG00000109674	49.5791	67.5242	31.634	0.468484	-1.09393	0.00310128	0.0137923
WHSC1	ENSG00000109685	1074.67	1475.66	673.668	0.456518	-1.13125	2.62187e-23	5.61568e-22
RAPGEF2	ENSG00000109756	338.319	220.334	456.304	2.07096	1.0503	7.16506e-11	7.91119e-10
KLF3	ENSG00000109787	296.784	160.346	433.222	2.70179	1.43392	3.93241e-18	6.94189e-17
KLHL5	ENSG00000109790	692.414	309.802	1075.03	3.47004	1.79495	3.3468e-45	1.33817e-43
CCDC34	ENSG00000109881	57.8013	82.6056	32.9969	0.399451	-1.32391	0.000141096	0.000798755
CRTAM	ENSG00000109943	14.6544	1.792	27.5168	15.3553	3.94067	7.00075e-07	5.36691e-06
LPXN	ENSG00000110031	2996.51	1013.52	4979.5	4.91306	2.29662	1.10215e-40	4.01601e-39
DTX4	ENSG00000110042	773.649	307.53	1239.77	4.03137	2.01127	3.89036e-58	2.01372e-56
EHD1	ENSG00000110047	8565.74	1539.14	15592.3	10.1306	3.34064	1.67261e-73	1.13674e-71
UNC93B1	ENSG00000110057	7437.85	3550.96	11324.7	3.1892	1.67319	1.02316e-67	6.2967e-66
NRXN2	ENSG00000110076	26.2514	46.2908	6.21199	0.134195	-2.8976	6.63156e-07	5.10292e-06
MS4A6A	ENSG00000110077	551.776	756.108	347.444	0.459516	-1.12181	5.19028e-16	8.14975e-15
MS4A4A	ENSG00000110079	80.542	117.241	43.8432	0.373959	-1.41905	4.18204e-06	2.92633e-05
CCND1	ENSG00000110092	5172.36	3014.6	7330.13	2.43154	1.28187	5.80018e-33	1.71369e-31
PANX1	ENSG00000110218	1638.26	465.865	2810.66	6.03321	2.59293	1.45453e-123	1.95222e-121
IL10RA	ENSG00000110324	7273.17	1556.22	12990.1	8.34723	3.0613	5.41857e-227	2.09746e-224
GALNT18	ENSG00000110328	57.7731	20.6157	94.9305	4.60478	2.20313	5.85411e-10	6.02302e-09
BIRC2	ENSG00000110330	745.159	447.787	1042.53	2.32819	1.21921	2.76147e-23	5.90994e-22
MMP12	ENSG00000110347	45.5417	2.68036	88.403	32.9817	5.0436	1.64102e-23	3.55186e-22
SLC1A2	ENSG00000110436	8.4645	0	16.929	#DIV/0!	#DIV/0!	1.89358e-06	1.38222e-05
SLC15A3	ENSG00000110446	2631.91	607.565	4656.25	7.66378	2.93806	9.00319e-82	6.71693e-80
AMBRA1	ENSG00000110497	1441.2	850.272	2032.13	2.38997	1.25699	2.02648e-25	4.69023e-24
HPS5	ENSG00000110756	969.553	531.887	1407.22	2.64571	1.40365	2.94098e-33	8.73755e-32
PPFIBP1	ENSG00000110841	2658.27	1624.56	3691.98	2.2726	1.18435	1.1281e-34	3.49946e-33
PRPF40B	ENSG00000110844	87.7048	46.7503	128.659	2.75205	1.46051	2.02417e-07	1.64128e-06
CD69	ENSG00000110848	123.716	2.37915	245.052	103	6.6865	2.864e-70	1.85217e-68
CAPRIN2	ENSG00000110888	229.266	341.379	117.153	0.343177	-1.54297	4.30678e-16	6.8065e-15
SLC11A2	ENSG00000110911	849.469	307.847	1391.09	4.51878	2.17593	3.60981e-69	2.29013e-67
MVK	ENSG00000110921	276.367	401.853	150.882	0.375466	-1.41324	1.35772e-15	2.07338e-14
IL23A	ENSG00000110944	1863.11	89.7431	3636.48	40.521	5.3406	0	0
BCL7A	ENSG00000110987	367.498	538.177	196.82	0.365716	-1.4512	7.61949e-16	1.18113e-14
CYP27B1	ENSG00000111012	167.119	106.933	227.306	2.12569	1.08793	1.59967e-07	1.31221e-06
SLC6A12	ENSG00000111181	50.9894	32.0825	69.8963	2.17864	1.12343	0.00116738	0.00567107
FOXM1	ENSG00000111206	291.694	394.042	189.346	0.480523	-1.05732	2.74208e-07	2.18817e-06
CUX2	ENSG00000111249	75.8902	120.304	31.4762	0.261639	-1.93435	2.03762e-09	2.00674e-08
SH2B3	ENSG00000111252	4829.64	2996.63	6662.64	2.22338	1.15275	3.36794e-36	1.08248e-34
DUSP16	ENSG00000111266	106.903	19.3955	194.41	10.0234	3.32531	5.75499e-32	1.6528e-30
GSG1	ENSG00000111305	20.9849	33.032	8.93781	0.27058	-1.88587	0.00136003	0.00651568
OAS3	ENSG00000111331	31438.6	5570.58	57306.7	10.2874	3.3628	1.28159e-292	7.44128e-290
OAS2	ENSG00000111335	18052.4	3904.31	32200.5	8.24742	3.04394	4.15485e-217	1.47963e-214
MGP	ENSG00000111341	80.821	38.3774	123.265	3.2119	1.68343	1.42474e-08	1.29964e-07
RASAL1	ENSG00000111344	11.4118	1.33254	21.491	16.1279	4.01149	6.56468e-06	4.46716e-05
SLC38A1	ENSG00000111371	4589.01	7223.89	1954.13	0.27051	-1.88625	4.86346e-90	4.13689e-88
VDR	ENSG00000111424	810.928	520.175	1101.68	2.11791	1.08264	1.06315e-18	1.933e-17
TBC1D30	ENSG00000111490	55.329	34.6505	76.0075	2.19355	1.13327	0.00125204	0.0060428
CDCA3	ENSG00000111665	72.0656	112.942	31.1892	0.276152	-1.85646	8.44172e-09	7.88097e-08
NT5DC3	ENSG00000111696	136.244	225.517	46.9701	0.208277	-2.26342	4.25252e-09	4.0739e-08
COL12A1	ENSG00000111799	34.8935	12.0998	57.6871	4.76759	2.25326	7.74193e-07	5.88612e-06
BTN3A3	ENSG00000111801	156.537	55.8838	257.189	4.60221	2.20233	1.70288e-22	3.55887e-21
DSE	ENSG00000111817	498.315	101.179	895.45	8.85013	3.1457	9.99638e-95	8.98968e-93
MAK	ENSG00000111837	10.8094	2.09322	19.5256	9.32802	3.22157	0.000304488	0.00163732
FAM184A	ENSG00000111879	12.0358	21.3458	2.72582	0.127698	-2.96919	0.000901094	0.00447016
NCOA7	ENSG00000111912	5416.35	1762.37	9070.34	5.14668	2.36364	1.89641e-139	2.97948e-137
FAM65B	ENSG00000111913	56.929	29.0704	84.7876	2.91663	1.5443	4.69739e-06	3.26046e-05
ULBP1	ENSG00000111981	50.7304	91.3463	10.1144	0.110726	-3.17493	9.59237e-13	1.22409e-11
FBXO5	ENSG00000112029	207.624	278.01	137.238	0.493643	-1.01846	4.14829e-07	3.25394e-06
SLC26A8	ENSG00000112053	30.8591	52.9383	8.78004	0.165854	-2.59201	1.09387e-06	8.17008e-06
SOD2	ENSG00000112096	24949.8	1113.69	48786	43.8057	5.45305	0	0
CD83	ENSG00000112149	4585.07	566.574	8603.57	15.1853	3.9246	0	0
TREML2	ENSG00000112195	19.4747	38.3469	0.602571	0.0157137	-5.99183	2.49055e-09	2.44021e-08
GPR63	ENSG00000112218	12.409	21.8052	3.01286	0.138171	-2.85547	0.00161707	0.00762424
PTP4A1	ENSG00000112245	3082.11	1574.02	4590.21	2.91623	1.54411	9.14996e-44	3.56248e-42
BVES	ENSG00000112276	289.99	190.688	389.293	2.04152	1.02964	1.87435e-09	1.85277e-08
C6orf62	ENSG00000112308	3132.16	1584.42	4679.9	2.95371	1.56253	4.29684e-60	2.32316e-58
TRIM38	ENSG00000112343	941.237	306.774	1575.7	5.13636	2.36075	2.01671e-47	8.49596e-46
PERP	ENSG00000112378	1394.05	857.251	1930.85	2.25238	1.17145	9.76386e-20	1.86273e-18
SLC16A10	ENSG00000112394	157.717	19.9827	295.452	14.7854	3.8861	7.17977e-54	3.47399e-52
PHACTR2	ENSG00000112419	610.125	306.652	913.598	2.97927	1.57496	4.35661e-32	1.25524e-30
TFEB	ENSG00000112561	1197.8	616.78	1778.82	2.88405	1.5281	4.92283e-32	1.41533e-30
DUSP22	ENSG00000112679	216.202	124.241	308.163	2.48037	1.31055	1.0242e-12	1.30326e-11
VEGFA	ENSG00000112715	3631.58	1706	5557.15	3.25741	1.70373	4.29676e-70	2.77204e-68
TTK	ENSG00000112742	143.835	215.02	72.6506	0.337879	-1.56542	1.20348e-11	1.41415e-10
FAM46A	ENSG00000112773	2116.82	887.868	3345.76	3.76831	1.91392	1.07137e-78	7.7548e-77
PRSS16	ENSG00000112812	8.37277	15.3826	1.36291	0.0886007	-3.49654	0.00252914	0.0114765
MEP1A	ENSG00000112818	14.7969	3.72697	25.8668	6.94044	2.79503	7.50752e-05	0.000442939
PAPD7	ENSG00000112941	1489.5	516.811	2462.19	4.76419	2.25223	3.36408e-93	2.99504e-91
KIF20A	ENSG00000112984	219.96	350.441	89.4789	0.255332	-1.96955	4.97115e-23	1.0546e-21
HBEGF	ENSG00000113070	3625.04	895.082	6355.01	7.09991	2.8278	4.80689e-177	1.08803e-174
ITK	ENSG00000113263	8.08402	0.44418	15.7239	35.3998	5.14567	2.60827e-05	0.000164613
THBS4	ENSG00000113296	36.8707	68.1321	5.60942	0.0823315	-3.60241	5.15651e-08	4.43702e-07
IL12B	ENSG00000113302	50.4552	3.88522	97.0253	24.9729	4.64229	1.42439e-23	3.09804e-22
GABRG2	ENSG00000113327	41.0878	55.6492	26.5264	0.476672	-1.06893	0.00722605	0.0295837
CCNG1	ENSG00000113328	953.509	1283.72	623.299	0.485542	-1.04233	7.91926e-12	9.45109e-11
ARRDC3	ENSG00000113369	629.079	189.845	1068.31	5.62728	2.49244	1.76104e-75	1.22809e-73
PDE4D	ENSG00000113448	189.164	88.9311	289.397	3.25417	1.70229	7.92337e-17	1.30714e-15
PRLR	ENSG00000113494	19.7018	8.81704	30.5866	3.46903	1.79453	0.00287127	0.0128824
LIFR	ENSG00000113594	143.722	4.63061	282.813	61.0746	5.9325	2.68488e-74	1.84821e-72
SEC24A	ENSG00000113615	494.993	294.511	695.475	2.36145	1.23967	3.22964e-19	6.04488e-18
TTC33	ENSG00000113638	97.4051	62.0052	132.805	2.14184	1.09885	5.84302e-05	0.000349446
WWC1	ENSG00000113645	167.915	248.088	87.7434	0.353679	-1.49949	7.31412e-12	8.7563e-11
DPYSL3	ENSG00000113657	45.9225	24.072	67.773	2.81543	1.49336	9.25739e-05	0.000539388
ERGIC1	ENSG00000113719	1525.45	900.638	2150.27	2.38749	1.2555	1.22108e-33	3.67273e-32
CPEB4	ENSG00000113742	493.778	290.876	696.68	2.39511	1.26009	1.62022e-19	3.07784e-18
HRH2	ENSG00000113749	161.231	266.324	56.1379	0.210788	-2.24614	5.69444e-22	1.16368e-20
DBN1	ENSG00000113758	2276.68	3800.34	753.019	0.198145	-2.33537	1.47326e-110	1.66031e-108
UNC5A	ENSG00000113763	50.2515	82.3404	18.1627	0.22058	-2.18063	6.052e-08	5.17755e-07
BCL6	ENSG00000113916	1613.42	724.76	2502.08	3.45229	1.78755	6.82915e-63	3.93103e-61
HGD	ENSG00000113924	216.226	59.3707	373.081	6.28391	2.65166	6.91526e-39	2.38939e-37
CD86	ENSG00000114013	144.561	59.2485	229.874	3.87983	1.95599	4.29383e-18	7.55992e-17
AMOTL2	ENSG00000114019	286.946	13.8766	560.016	40.357	5.33475	3.17652e-122	4.15891e-120
OGG1	ENSG00000114026	367.784	522.106	213.462	0.408848	-1.29036	5.82716e-16	9.08038e-15
CEP70	ENSG00000114107	215	364.007	65.9938	0.181298	-2.46356	1.67626e-31	4.7227e-30
XRN1	ENSG00000114127	1622.06	492.928	2751.19	5.58133	2.48061	3.08788e-111	3.55492e-109
WNT5A	ENSG00000114251	416.318	71.4553	761.182	10.6526	3.41313	6.85975e-93	6.06679e-91
ECT2	ENSG00000114346	98.5689	139.766	57.3716	0.410482	-1.28461	8.38051e-06	5.63107e-05
NPRL2	ENSG00000114388	170.917	230.346	111.487	0.483997	-1.04693	1.29313e-06	9.5833e-06
CBLB	ENSG00000114423	510.273	201.69	818.855	4.05998	2.02147	1.38644e-46	5.70575e-45
BBX	ENSG00000114439	309.305	193.281	425.329	2.20058	1.13788	1.13971e-08	1.05076e-07
GNB4	ENSG00000114450	747.518	208.684	1286.35	6.16411	2.62389	3.2772e-83	2.50804e-81
ATP6V1A	ENSG00000114573	1335.94	748.011	1923.87	2.57197	1.36288	5.49895e-37	1.80432e-35
PLSCR4	ENSG00000114698	26.1295	7.46922	44.7898	5.99658	2.58414	1.11952e-06	8.35467e-06
MAPKAPK3	ENSG00000114738	3484.94	4772.23	2197.66	0.460509	-1.1187	1.21459e-31	3.45112e-30
PEX5L	ENSG00000114757	160.778	28.8456	292.71	10.1475	3.34305	3.75709e-23	8.00225e-22
ABCC5	ENSG00000114770	129.878	179.215	80.5411	0.449409	-1.1539	9.98334e-07	7.48583e-06
KLHL24	ENSG00000114796	473.812	264.343	683.281	2.58482	1.37007	3.82253e-22	7.86564e-21
VIPR1	ENSG00000114812	47.948	89.7125	6.18348	0.0689255	-3.85882	4.48454e-15	6.60295e-14
SLC4A3	ENSG00000114923	17.5701	32.4143	2.72582	0.0840933	-3.57187	4.07341e-06	2.85406e-05
MOB1A	ENSG00000114978	4500.93	2458.63	6543.23	2.66133	1.41215	9.2188e-54	4.44449e-52
IL1A	ENSG00000115008	46.8189	2.5374	91.1003	35.9031	5.16604	1.82267e-24	4.1151e-23
CCL20	ENSG00000115009	3411.17	64.4509	6757.88	104.853	6.71223	0	0
SLC35F5	ENSG00000115084	531.603	318.951	744.255	2.33344	1.22246	6.12144e-15	8.94406e-14
STEAP3	ENSG00000115107	428.117	586.046	270.187	0.461034	-1.11705	3.71512e-14	5.20331e-13
CENPA	ENSG00000115163	132.009	214.851	49.1656	0.228835	-2.12762	5.67277e-17	9.45191e-16
CYTIP	ENSG00000115165	1722.8	566.354	2879.25	5.08383	2.34592	6.99923e-105	7.27402e-103
NRBP1	ENSG00000115216	3321.75	1987.36	4656.14	2.34288	1.22828	3.6142e-38	1.22502e-36
REEP6	ENSG00000115255	204.341	272.691	135.991	0.4987	-1.00376	6.48321e-07	4.99596e-06
IFIH1	ENSG00000115267	3917.5	446.377	7388.62	16.5524	4.04897	4.34606e-163	8.23254e-161
GCA	ENSG00000115271	233.754	95.0579	372.449	3.91813	1.97017	1.87236e-26	4.51752e-25
SPTBN1	ENSG00000115306	967.862	1443.81	491.912	0.340704	-1.55341	2.40409e-39	8.43769e-38
GALNT3	ENSG00000115339	41.697	25.4198	57.9741	2.28067	1.18946	0.00364651	0.0159742
CCDC88A	ENSG00000115355	538.353	340.592	736.115	2.16128	1.11189	0.00416512	0.0180243
EVA1A	ENSG00000115363	56.9761	2.5374	111.415	43.9091	5.45645	2.51001e-30	6.83384e-29
FN1	ENSG00000115414	1730.3	185.552	3275.05	17.6503	4.14162	6.14178e-267	2.9293e-264
STAT1	ENSG00000115415	16149	4500.73	27797.2	6.17616	2.62671	8.96852e-184	2.25981e-181
PECR	ENSG00000115425	51.1189	68.9539	33.2839	0.482699	-1.05081	0.00542655	0.0229006
IGFBP5	ENSG00000115461	154.672	12.8299	296.514	23.1111	4.53051	7.11633e-39	2.45568e-37
GNLY	ENSG00000115523	142.239	81.1301	203.348	2.50644	1.32564	3.07159e-09	2.98433e-08
ST3GAL5	ENSG00000115525	769.351	432.991	1105.71	2.55366	1.35257	3.64788e-28	9.27916e-27
WNT6	ENSG00000115596	123.984	173.094	74.8746	0.432566	-1.20901	1.07653e-06	8.05184e-06
IL18R1	ENSG00000115604	94.9915	10.609	179.374	16.9076	4.0796	3.48042e-36	1.11595e-34
IL18RAP	ENSG00000115607	17.7824	0.602428	34.9624	58.0358	5.85887	1.13408e-10	1.23382e-09
FHL2	ENSG00000115641	355.496	516.367	194.625	0.376911	-1.4077	2.19477e-18	3.92634e-17
UXS1	ENSG00000115652	3304.83	2024.24	4585.42	2.26525	1.17967	3.15398e-34	9.60543e-33
QPCT	ENSG00000115828	100.446	60.9128	139.979	2.29802	1.20039	3.18564e-06	2.26713e-05
DLX2	ENSG00000115844	14.8035	24.6286	4.97834	0.202137	-2.3066	0.00339967	0.0149739
SDC1	ENSG00000115884	28.881	14.0195	43.7424	3.12011	1.6416	0.00050587	0.00261999
PLCL1	ENSG00000115896	49.7231	26.6094	72.8369	2.73726	1.45273	0.00012543	0.000716756
KYNU	ENSG00000115919	2604.45	466.34	4742.56	10.1698	3.34621	9.64654e-219	3.52944e-216
WIPF1	ENSG00000115935	3440.45	1849.97	5030.93	2.71947	1.44332	5.68221e-53	2.70528e-51
PLEK	ENSG00000115956	14391.6	5555.43	23227.8	4.1811	2.06388	2.50332e-119	3.23001e-117
RND3	ENSG00000115963	1323.19	164.282	2482.1	15.1087	3.91731	2.36547e-95	2.15629e-93
EPAS1	ENSG00000116016	180.057	106.969	253.144	2.36652	1.24277	2.48657e-10	2.64597e-09
CD207	ENSG00000116031	6.35536	1.20486	11.5059	9.54958	3.25544	0.00984136	0.0389181
VAX2	ENSG00000116035	59.8922	26.9772	92.8073	3.44022	1.7825	7.71128e-08	6.53636e-07
NFE2L2	ENSG00000116044	2703.08	1278.33	4127.83	3.22909	1.69113	3.8188e-66	2.30761e-64
DHCR24	ENSG00000116133	4925.88	7700.93	2150.82	0.279293	-1.84015	1.35915e-74	9.38024e-73
PAPPA2	ENSG00000116183	45.3954	70.1893	20.6014	0.293513	-1.76851	9.13522e-06	6.09829e-05
CHD5	ENSG00000116254	10.1649	17.7618	2.56805	0.144583	-2.79003	0.00473093	0.020227
RNF19B	ENSG00000116514	5682.56	602.154	10763	17.8741	4.1598	0	0
FBXO6	ENSG00000116663	1533.31	514.555	2552.07	4.95977	2.31027	1.7453e-60	9.59158e-59
C1orf21	ENSG00000116667	1162.25	412.589	1911.91	4.63394	2.21224	2.17712e-82	1.64262e-80
SWT1	ENSG00000116668	89.3456	50.319	128.372	2.55117	1.35116	1.11065e-06	8.29309e-06
DNAJC6	ENSG00000116675	23.2456	9.87893	36.6123	3.7061	1.8899	0.000631146	0.00322257
PLA2G4A	ENSG00000116711	135.39	84.8778	185.902	2.19023	1.13108	4.61275e-07	3.6024e-06
RGS2	ENSG00000116741	2200.11	682.917	3717.31	5.44328	2.44448	2.47566e-57	1.26188e-55
CD58	ENSG00000116815	874.623	355.7	1393.55	3.91775	1.97003	4.75083e-60	2.56344e-58
TFAP2E	ENSG00000116819	32.1845	44.0547	20.3144	0.461118	-1.11679	0.0112321	0.0436995
KIF21B	ENSG00000116852	1604.4	2164.4	1044.41	0.482541	-1.05128	1.18511e-23	2.58181e-22
ADPRHL2	ENSG00000116863	1111.21	475.197	1747.22	3.67683	1.87846	3.44592e-45	1.37574e-43
NID1	ENSG00000116962	2446.86	1535.83	3357.88	2.18637	1.12853	5.40591e-31	1.49623e-29
LGALS8	ENSG00000116977	2016.24	1063.25	2969.22	2.79259	1.4816	3.89312e-49	1.7244e-47
NT5C1A	ENSG00000116981	12.0694	22.9337	1.20514	0.052549	-4.25019	0.0016347	0.00769903
BMP8B	ENSG00000116985	5602.15	10419.1	785.157	0.0753572	-3.73011	2.54172e-295	1.54288e-292
MYCL	ENSG00000116990	429.801	640.659	218.942	0.341745	-1.54901	5.11763e-24	1.13151e-22
KMO	ENSG00000117009	106.102	11.4974	200.707	17.4567	4.12571	1.1364e-40	4.12955e-39
ETV3	ENSG00000117036	760.609	307.765	1213.45	3.94279	1.97922	6.40868e-55	3.1465e-53
ACADM	ENSG00000117054	543.474	743.507	343.44	0.461919	-1.11429	4.09902e-16	6.48582e-15
SLAMF1	ENSG00000117090	128.353	51.4933	205.212	3.98522	1.99466	6.17477e-17	1.025e-15
CD48	ENSG00000117091	6.79999	0.44418	13.1558	29.6182	4.88841	0.00018836	0.00104549
KDM5B	ENSG00000117139	1425.83	1998.29	853.373	0.427052	-1.22751	7.49049e-30	2.0188e-28
SSX2IP	ENSG00000117155	79.8653	119.891	39.84	0.332303	-1.58943	1.20724e-07	1.00293e-06
GBP3	ENSG00000117226	1397.39	140.281	2654.51	18.9227	4.24205	7.4402e-28	1.87295e-26
GBP1	ENSG00000117228	1535.96	12.8452	3059.07	238.148	7.89572	1.13228e-192	3.08592e-190
KIF17	ENSG00000117245	1130.94	1631.33	630.544	0.386521	-1.37138	1.04365e-32	3.06317e-31
TXNIP	ENSG00000117289	6794.46	4492.06	9096.85	2.02509	1.01799	5.43173e-31	1.50182e-29
ECE1	ENSG00000117298	1965.6	859.017	3072.19	3.5764	1.83851	3.96298e-71	2.58164e-69
ID3	ENSG00000117318	98.5409	36.473	160.609	4.40349	2.13865	1.15738e-14	1.67275e-13
CDC20	ENSG00000117399	2814.14	4512.04	1116.24	0.247392	-2.01513	2.82164e-90	2.40777e-88
PTCH2	ENSG00000117425	37.8204	61.7247	13.9162	0.225455	-2.14909	3.43771e-05	0.000213183
PRDX1	ENSG00000117450	8538.35	5498.89	11577.8	2.10548	1.07415	4.33965e-29	1.13524e-27
PIK3R3	ENSG00000117461	444.473	177.204	711.742	4.01651	2.00594	9.43982e-29	2.44547e-27
BLZF1	ENSG00000117475	740.934	193.01	1288.86	6.67767	2.73934	4.52027e-94	4.05141e-92
SLC19A2	ENSG00000117479	47.0725	31.3218	62.8232	2.00573	1.00413	0.0057468	0.0241225
CNN3	ENSG00000117519	46.5711	71.5218	21.6203	0.30229	-1.726	2.30487e-05	0.000146538
FASLG	ENSG00000117560	17.5375	3.44104	31.634	9.19316	3.20056	3.75898e-06	2.64625e-05
IRF6	ENSG00000117595	40.7198	4.4418	76.9979	17.3348	4.1156	9.58549e-19	1.74519e-17
LPPR4	ENSG00000117600	10.6589	1.18957	20.1281	16.9205	4.0807	1.67473e-05	0.000108621
C1orf63	ENSG00000117616	632.428	899.308	365.547	0.406476	-1.29876	1.20831e-09	1.21326e-08
RCOR3	ENSG00000117625	212.07	286.802	137.339	0.478862	-1.06232	2.4667e-08	2.19903e-07
MAN1C1	ENSG00000117643	198.998	307.627	90.3685	0.29376	-1.76729	1.1182e-17	1.92311e-16
NEK2	ENSG00000117650	70.235	108.363	32.1073	0.296295	-1.75489	7.25134e-08	6.16018e-07
PROX1	ENSG00000117707	16.1373	6.56558	25.709	3.91573	1.96928	0.00201676	0.00934243
CENPF	ENSG00000117724	237.418	322.478	152.359	0.472464	-1.08172	0.00884395	0.0353983
STX12	ENSG00000117758	1132.31	549.772	1714.84	3.11918	1.64117	1.54555e-48	6.71219e-47
ESYT2	ENSG00000117868	7284.93	9871.75	4698.1	0.475914	-1.07123	2.18944e-33	6.54115e-32
MMP8	ENSG00000118113	412.734	0.602428	824.866	1369.24	10.4192	1.76798e-215	6.05396e-213
KIF14	ENSG00000118193	72.1706	103.425	40.9159	0.395608	-1.33786	4.07063e-05	0.000249478
CAMSAP2	ENSG00000118200	193.347	118.859	267.834	2.25337	1.17208	3.65664e-09	3.52581e-08
MREG	ENSG00000118242	96.2055	23.2655	169.146	7.27024	2.862	7.57335e-24	1.66209e-22
NRP2	ENSG00000118257	3488.79	731.724	6245.86	8.53581	3.09353	9.07051e-205	2.81703e-202
LRMP	ENSG00000118308	1435.04	2234.79	635.292	0.284274	-1.81465	2.9886e-60	1.62571e-58
USP35	ENSG00000118369	170.125	228.993	111.257	0.485853	-1.04141	5.98954e-07	4.63426e-06
SGIP1	ENSG00000118473	23.6478	6.72383	40.5718	6.03404	2.59312	4.44922e-06	3.10029e-05
PLAGL1	ENSG00000118495	932.344	269.735	1594.95	5.91305	2.5639	1.5814e-29	4.19439e-28
TNFAIP3	ENSG00000118503	5469.65	1415.71	9523.59	6.72707	2.74998	1.00845e-138	1.57512e-136
AKAP7	ENSG00000118507	101.006	41.2008	160.81	3.90309	1.96462	7.99865e-14	1.09054e-12
MYB	ENSG00000118513	3160.34	4720.47	1600.21	0.338994	-1.56067	4.38972e-58	2.25906e-56
SGK1	ENSG00000118515	5920.78	1929.49	9912.06	5.13713	2.36096	2.97354e-105	3.12678e-103
CTGF	ENSG00000118523	2198.14	96.0893	4300.19	44.7521	5.48388	0	0
ARMC2	ENSG00000118690	52.2091	70.317	34.1013	0.484965	-1.04405	0.00273759	0.0123427
SPP1	ENSG00000118785	22434.6	2746.04	42123.1	15.3396	3.93919	0	0
KLF12	ENSG00000118922	55.2028	76.8061	33.5995	0.437458	-1.19278	0.00113297	0.00551999
PCDH17	ENSG00000118946	16.4909	1.34782	31.634	23.4705	4.55277	2.13957e-08	1.9241e-07
WDR35	ENSG00000118965	117.594	71.6954	163.492	2.28038	1.18927	1.32773e-06	9.82609e-06
ELL2	ENSG00000118985	1226.62	235.896	2217.34	9.39963	3.2326	3.74412e-159	6.94456e-157
TJP2	ENSG00000119139	222.94	106.285	339.595	3.19515	1.67588	7.48455e-19	1.36921e-17
PIGZ	ENSG00000119227	53.6448	74.5798	32.7099	0.438589	-1.18906	0.000657203	0.00334411
NR4A3	ENSG00000119508	643.831	62.0412	1225.62	19.7549	4.30414	2.5381e-172	5.29609e-170
GALNT12	ENSG00000119514	68.3315	101.256	35.4072	0.349681	-1.51589	3.88441e-06	2.72592e-05
ONECUT2	ENSG00000119547	191.384	292.657	90.1099	0.307903	-1.69945	3.34249e-09	3.23576e-08
IFT43	ENSG00000119650	89.4454	54.2195	124.671	2.29938	1.20124	1.03234e-05	6.84698e-05
NPC2	ENSG00000119655	3860.4	2502.23	5218.56	2.08556	1.06044	3.63648e-13	4.75878e-12
IRF2BPL	ENSG00000119669	1535.19	751.436	2318.94	3.08601	1.62574	7.08449e-53	3.34902e-51
FLVCR2	ENSG00000119686	54.2685	31.5106	77.0264	2.44446	1.28951	0.000201275	0.00111186
TGFB3	ENSG00000119699	266.958	23.296	510.621	21.9188	4.4541	6.8756e-96	6.35434e-94
GPR68	ENSG00000119714	656.359	357.67	955.048	2.67019	1.41694	3.94009e-23	8.37865e-22
KLHL29	ENSG00000119771	78.091	45.3414	110.841	2.44458	1.28959	9.3803e-06	6.25564e-05
BCL11A	ENSG00000119866	43.8906	23.5667	64.2146	2.72481	1.44615	0.000196092	0.00108458
OGFRL1	ENSG00000119900	5403.21	997.094	9809.33	9.83792	3.29835	4.71282e-247	2.06352e-244
IFIT3	ENSG00000119917	12272.2	757.333	23787	31.409	4.9731	1.10511e-184	2.8111e-182
IFIT2	ENSG00000119922	11465.4	189.146	22741.6	120.233	6.90969	6.58022e-177	1.4769e-174
PYROXD2	ENSG00000119943	117.172	184.418	49.9259	0.270722	-1.88512	7.3091e-13	9.4036e-12
MXI1	ENSG00000119950	239.599	349.936	129.262	0.369387	-1.43679	1.77858e-14	2.54577e-13
TCTN3	ENSG00000119977	2406.08	1088.93	3723.22	3.41916	1.77364	1.38031e-31	3.90953e-30
AVPI1	ENSG00000119986	303.689	171.317	436.061	2.54534	1.34786	4.97738e-16	7.82004e-15
GNA13	ENSG00000120063	1985.55	863.746	3107.35	3.59753	1.84701	7.69834e-73	5.17922e-71
DUSP1	ENSG00000120129	1600.09	155.7	3044.49	19.5535	4.28936	1.13977e-100	1.1359e-98
MOB3B	ENSG00000120162	111.545	38.3774	184.712	4.81303	2.26694	5.0912e-17	8.50943e-16
CD274	ENSG00000120217	1919.7	7.16801	3832.24	534.631	9.0624	0	0
CYSTM1	ENSG00000120306	665.714	404.171	927.257	2.29422	1.19801	3.12858e-21	6.24991e-20
TNFSF18	ENSG00000120337	58.944	13.4171	104.471	7.7864	2.96096	4.22018e-16	6.67358e-15
GORAB	ENSG00000120370	79.6223	46.0508	113.194	2.45803	1.2975	1.1807e-05	7.76735e-05
NUDCD1	ENSG00000120526	687.739	280.053	1095.43	3.91149	1.96772	6.57023e-53	3.11695e-51
MASTL	ENSG00000120539	764.912	244.049	1285.78	5.2685	2.39739	3.69685e-78	2.64716e-76
KIAA1217	ENSG00000120549	293.115	12.9882	573.242	44.1356	5.46387	1.70592e-125	2.3608e-123
PLXDC2	ENSG00000120594	1877.51	1228.71	2526.32	2.05608	1.0399	5.90338e-25	1.34879e-23
ALG5	ENSG00000120697	841.795	484.525	1199.07	2.47473	1.30727	8.10834e-28	2.03731e-26
TGFBI	ENSG00000120708	11573.1	3265.73	19880.5	6.08761	2.60588	1.2831e-179	3.05985e-177
ZFP30	ENSG00000120784	20.8042	32.9861	8.62227	0.261391	-1.93572	0.00176958	0.00828463
NFYB	ENSG00000120837	263.224	352.468	173.979	0.493604	-1.01858	3.98619e-09	3.83251e-08
CLU	ENSG00000120885	179.419	252.718	106.121	0.419918	-1.25182	1.2838e-09	1.28375e-08
RDH10	ENSG00000121039	748.436	220.406	1276.46	5.79142	2.53392	1.78602e-85	1.39891e-83
AKAP1	ENSG00000121057	991.629	1441.39	541.867	0.375933	-1.41145	1.68531e-33	5.05762e-32
TRIM25	ENSG00000121060	7580.77	3351.38	11810.2	3.52397	1.8172	5.48172e-89	4.50496e-87
TBX2	ENSG00000121068	662.442	340.399	984.486	2.89216	1.53215	9.00358e-33	2.64842e-31
TEX14	ENSG00000121101	10.9299	4.61533	17.2445	3.73636	1.90163	0.0128919	0.0494019
NCAPH	ENSG00000121152	309.446	441.583	177.308	0.401527	-1.31643	3.36988e-15	5.00312e-14
KIAA0922	ENSG00000121210	683.717	931.974	435.459	0.467244	-1.09775	1.14725e-17	1.96928e-16
MND1	ENSG00000121211	82.9934	124.582	41.4044	0.332346	-1.58924	2.55252e-07	2.04424e-06
ECHDC2	ENSG00000121310	636.3	877.942	394.657	0.449525	-1.15353	4.40339e-19	8.17874e-18
BCL2L14	ENSG00000121380	5.98959	0	11.9792	#DIV/0!	#DIV/0!	0.00120527	0.0058371
POPDC2	ENSG00000121577	31.193	7.89812	54.488	6.89885	2.78636	9.38845e-09	8.71589e-08
B4GALT4	ENSG00000121578	141.9	91.6016	192.199	2.09821	1.06916	0.00116847	0.00567533
CD80	ENSG00000121594	189.459	1.95025	376.968	193.292	7.59464	1.44147e-105	1.52174e-103
KIF18A	ENSG00000121621	36.8423	53.7142	19.9704	0.371789	-1.42744	0.00156533	0.00739839
DEPDC7	ENSG00000121690	30.024	44.6112	15.4368	0.34603	-1.53103	0.00216267	0.00995225
CAT	ENSG00000121691	1573.29	2169.28	977.297	0.450516	-1.15035	1.35504e-27	3.37609e-26
CCRL2	ENSG00000121797	82.3931	14.1625	150.624	10.6354	3.4108	3.6491e-26	8.69435e-25
CCR2	ENSG00000121807	184.175	315.699	52.6517	0.166778	-2.584	1.00679e-29	2.69172e-28
TNFSF10	ENSG00000121858	4470.3	174.018	8766.59	50.3774	5.6547	0	0
ADORA3	ENSG00000121933	435.19	243.508	626.871	2.57433	1.3642	2.33768e-21	4.69286e-20
GPSM2	ENSG00000121957	105.907	147.914	63.8991	0.432001	-1.2109	3.53089e-06	2.49819e-05
CXCR4	ENSG00000121966	445.089	190.442	699.737	3.67427	1.87746	3.20557e-37	1.05962e-35
ACVR2A	ENSG00000121989	106.559	53.27	159.848	3.00072	1.58531	4.7253e-10	4.907e-09
FLT3	ENSG00000122025	104.156	178.644	29.6685	0.166077	-2.59008	5.05619e-19	9.35869e-18
RASL11A	ENSG00000122035	53.5161	8.80176	98.2304	11.1603	3.48031	2.56003e-18	4.55535e-17
UBL3	ENSG00000122042	676.01	422.066	929.955	2.20334	1.13969	5.93071e-20	1.13959e-18
FYTTD1	ENSG00000122068	1412.33	740.771	2083.88	2.81313	1.49218	8.87855e-44	3.46186e-42
RBBP6	ENSG00000122257	1112.88	645.135	1580.62	2.45006	1.29282	2.72636e-05	0.000171579
FAM213A	ENSG00000122378	302.03	421.171	182.889	0.434239	-1.20344	2.186e-07	1.76339e-06
NBPF14	ENSG00000122497	299.353	185.27	413.436	2.23153	1.15803	5.69196e-05	0.00034171
ZMIZ2	ENSG00000122515	2547.61	1274.98	3820.24	2.99632	1.58319	1.83256e-58	9.5972e-57
HERPUD2	ENSG00000122557	853.176	396.39	1309.96	3.30473	1.72453	1.93809e-40	7.01414e-39
INHBA	ENSG00000122641	963.373	34.7629	1891.98	54.4254	5.76621	2.43349e-239	1.01556e-236
NT5C3A	ENSG00000122643	722.743	193.685	1251.8	6.46309	2.69222	1.27379e-88	1.03409e-86
C7orf49	ENSG00000122783	363.539	241.966	485.111	2.00487	1.00351	1.9168e-09	1.89194e-08
NUDT10	ENSG00000122824	12.5894	20.3297	4.84908	0.238521	-2.06781	0.00822403	0.0331856
NEUROG3	ENSG00000122859	39.2673	54.0307	24.5039	0.453518	-1.14077	0.00859333	0.0345193
PLAU	ENSG00000122861	2310.95	1435.44	3186.46	2.21985	1.15046	1.3122e-31	3.7245e-30
BICC1	ENSG00000122870	20.7927	4.7583	36.8271	7.73956	2.95225	0.000626106	0.00320235
CISD1	ENSG00000122873	221.799	141.762	301.837	2.12917	1.09029	1.19133e-09	1.19711e-08
P4HA1	ENSG00000122884	444.032	262.486	625.578	2.38329	1.25295	6.2687e-19	1.15231e-17
CIT	ENSG00000122966	319.076	470.414	167.739	0.356577	-1.48771	6.56799e-19	1.2065e-17
BHLHE41	ENSG00000123095	75.2394	3.13982	147.339	46.9259	5.55231	2.15108e-32	6.25852e-31
ACOT9	ENSG00000123130	987.209	337.596	1636.82	4.84846	2.27753	4.33143e-81	3.20465e-79
CD97	ENSG00000123146	3389.36	1793.86	4984.87	2.77885	1.47449	7.64309e-33	2.25319e-31
OPTN	ENSG00000123240	1736.7	449.083	3024.32	6.73444	2.75156	8.02751e-112	9.36274e-110
ARHGAP9	ENSG00000123329	948.368	1273.48	623.256	0.489411	-1.03088	3.07285e-18	5.45334e-17
MMP19	ENSG00000123342	712.93	84.4489	1341.41	15.8843	3.98953	1.17815e-165	2.3309e-163
NR4A1	ENSG00000123358	439.044	47.6387	830.449	17.4322	4.12369	8.8639e-51	4.04003e-49
NFE2	ENSG00000123405	106.921	178.981	34.8616	0.194779	-2.36009	2.32355e-17	3.9403e-16
METTL21B	ENSG00000123427	414.78	175.545	654.015	3.72562	1.89748	1.52808e-15	2.32556e-14
HJURP	ENSG00000123485	260.574	400.796	120.353	0.300284	-1.7356	4.30904e-21	8.54418e-20
RAB9A	ENSG00000123595	514.307	257.604	771.009	2.993	1.58159	7.57451e-30	2.03939e-28
NMI	ENSG00000123609	1394.42	748.22	2040.61	2.72729	1.44747	1.51597e-40	5.50137e-39
TNFAIP6	ENSG00000123610	225.87	1.18957	450.55	378.749	8.5651	9.4663e-40	3.35771e-38
BATF3	ENSG00000123685	82.3877	53.6324	111.143	2.07231	1.05124	0.00788394	0.0319678
G0S2	ENSG00000123689	220.721	59.6108	381.832	6.40542	2.67929	6.09609e-41	2.23655e-39
RAP2C	ENSG00000123728	741.696	367.463	1115.93	3.03685	1.60257	2.4291e-38	8.2543e-37
EXOSC9	ENSG00000123737	697.354	255.225	1139.48	4.46462	2.15854	2.93547e-61	1.64024e-59
RAB38	ENSG00000123892	32.9021	21.1722	44.632	2.10804	1.07591	0.0106677	0.0417836
AGO2	ENSG00000123908	1689.5	704.594	2674.42	3.79568	1.92436	8.59701e-74	5.87257e-72
DNPEP	ENSG00000123992	1154.26	760.641	1547.89	2.03498	1.02501	2.62269e-20	5.0908e-19
FAM210B	ENSG00000124098	309.724	416.832	202.616	0.486084	-1.04072	8.54232e-10	8.67187e-09
PREX1	ENSG00000124126	1515.51	2186.24	844.779	0.386408	-1.3718	2.93206e-37	9.71616e-36
SDC4	ENSG00000124145	1301.03	755.679	1846.38	2.44334	1.28886	2.6531e-19	4.98324e-18
PARD6B	ENSG00000124171	7.16784	13.5753	0.76034	0.0560089	-4.1582	0.00226292	0.0103742
ZNFX1	ENSG00000124201	8988.13	1913.72	16062.5	8.39339	3.06925	3.41427e-232	1.40295e-229
SNAI1	ENSG00000124216	1734.81	407.566	3062.05	7.51302	2.90939	7.95413e-64	4.64873e-62
PPP4R1L	ENSG00000124224	47.5294	24.5314	70.5274	2.87498	1.52355	7.36825e-05	0.000435106
PMEPA1	ENSG00000124225	472.036	184.969	759.102	4.10394	2.03701	4.32774e-44	1.69735e-42
RNF114	ENSG00000124226	2131.47	1122.36	3140.59	2.79822	1.48451	1.6295e-49	7.31469e-48
ZBP1	ENSG00000124256	6.03965	0.44418	11.6351	26.1946	4.7112	0.000685462	0.00347797
NAGK	ENSG00000124357	2031.81	868.017	3195.61	3.6815	1.8803	1.5364e-72	1.0259e-70
F13A1	ENSG00000124491	4.32176	8.64351	0	0	#NUM!	0.00933992	0.0371455
GRM4	ENSG00000124493	14.5016	24.9145	4.08874	0.164111	-2.60726	0.000879621	0.00437338
TRERF1	ENSG00000124496	2030.92	2868.63	1193.22	0.415957	-1.26549	4.23103e-29	1.10899e-27
KLHDC3	ENSG00000124702	4849.37	6750.09	2948.65	0.436832	-1.19485	4.0519e-38	1.3699e-36
TREM1	ENSG00000124731	47.5769	10.7673	84.3865	7.8373	2.97036	8.25515e-09	7.71202e-08
CDKN1A	ENSG00000124762	44366.6	23793.4	64939.8	2.72932	1.44854	1.9696e-34	6.06758e-33
EEF1E1	ENSG00000124802	28.0021	42.3751	13.6291	0.321631	-1.63652	0.0014256	0.00679327
CXCL6	ENSG00000124875	67.7223	1.04661	134.398	128.413	7.00465	4.09968e-41	1.5145e-39
AHNAK	ENSG00000124942	10984.7	14822.5	7146.9	0.482166	-1.0524	3.92283e-34	1.18927e-32
MT2A	ENSG00000125148	5173.4	726.345	9620.46	13.245	3.72738	1.14616e-26	2.78045e-25
C16orf70	ENSG00000125149	864.772	539.96	1189.58	2.2031	1.13953	5.5174e-16	8.62283e-15
EFNB2	ENSG00000125266	135.725	80.4971	190.952	2.37216	1.2462	3.59667e-08	3.14446e-07
IRF1	ENSG00000125347	3790.07	945.238	6634.9	7.01929	2.81132	5.37925e-179	1.27146e-176
TMEM255A	ENSG00000125355	383.972	221.228	546.716	2.47128	1.30526	5.67829e-18	9.92549e-17
PTGER2	ENSG00000125384	57.271	21.0598	93.4821	4.43888	2.1502	6.3108e-10	6.4779e-09
HS3ST3B1	ENSG00000125430	1384.25	178.981	2589.51	14.4681	3.8548	2.32789e-218	8.4021e-216
SLC25A35	ENSG00000125434	105.863	148.486	63.2395	0.425895	-1.23143	4.73096e-06	3.28036e-05
OPRL1	ENSG00000125510	113.547	153.367	73.7265	0.48072	-1.05673	2.32816e-05	0.000147948
SLC2A4RG	ENSG00000125520	1968.75	2640.41	1297.1	0.491249	-1.02547	4.3656e-14	6.07612e-13
IL1B	ENSG00000125538	60817.9	8699.35	112936	12.9822	3.69846	0	0
GTF2F1	ENSG00000125651	4354.82	2898.64	5810.99	2.00473	1.00341	5.60672e-20	1.07811e-18
TNFSF9	ENSG00000125657	548.875	354.183	743.566	2.09938	1.06997	2.69278e-08	2.39101e-07
CD70	ENSG00000125726	2438.59	1164.99	3712.19	3.18644	1.67195	4.48165e-51	2.05671e-49
C3	ENSG00000125730	1119.3	463.644	1774.95	3.82825	1.93669	4.36862e-64	2.57575e-62
SH2D3A	ENSG00000125731	43.8672	13.9071	73.8273	5.3086	2.40833	3.54373e-09	3.42189e-08
TRIP10	ENSG00000125733	622.804	340.531	905.078	2.65785	1.41026	4.32715e-24	9.59917e-23
FOSB	ENSG00000125740	72.8968	15.6991	130.094	8.28673	3.0508	6.1348e-19	1.12925e-17
PANK2	ENSG00000125779	257.454	148.67	366.237	2.46343	1.30067	2.03274e-13	2.71056e-12
NKX2-4	ENSG00000125816	249.253	165.293	333.212	2.01589	1.01141	6.99593e-09	6.58401e-08
RBCK1	ENSG00000125826	4357.26	2236.62	6477.91	2.89629	1.53421	2.73685e-61	1.53246e-59
RRBP1	ENSG00000125844	2044.59	956.366	3132.81	3.27574	1.71182	1.49001e-13	1.99782e-12
BMP2	ENSG00000125845	273.654	110.027	437.282	3.97432	1.99071	3.36677e-30	9.11998e-29
BFSP1	ENSG00000125864	22.4605	35.3806	9.54038	0.26965	-1.89084	0.00113406	0.00552327
LAMP5	ENSG00000125869	139.837	235.33	44.345	0.188438	-2.40784	1.85659e-21	3.74529e-20
MAX	ENSG00000125952	1893.37	1162.71	2624.03	2.25681	1.17429	1.81539e-31	5.09319e-30
ID1	ENSG00000125968	138.688	57.3288	220.047	3.83833	1.94048	4.1554e-17	6.97591e-16
TMEM53	ENSG00000126106	67.7425	116.562	18.923	0.162343	-2.62288	2.73431e-13	3.60467e-12
FFAR2	ENSG00000126262	20.0898	5.66194	34.5176	6.09643	2.60796	1.38112e-05	9.03243e-05
THRA	ENSG00000126351	184.555	264.41	104.701	0.39598	-1.3365	1.74478e-10	1.87379e-09
CCR7	ENSG00000126353	3318.64	24.4856	6612.79	270.069	8.07718	0	0
NR1D1	ENSG00000126368	38.141	52.0652	24.2169	0.465126	-1.10431	0.0113167	0.0439904
FLRT1	ENSG00000126500	45.8468	88.5229	3.17063	0.035817	-4.80321	6.66823e-18	1.16179e-16
STAT5A	ENSG00000126561	1503.19	803.925	2202.46	2.73964	1.45398	8.3221e-43	3.18902e-41
IFI6	ENSG00000126709	24788.5	8967.42	40609.5	4.52857	2.17905	1.36086e-134	2.05351e-132
CFP	ENSG00000126759	382.45	247.664	517.236	2.08846	1.06244	1.02898e-07	8.61266e-07
SIX1	ENSG00000126778	102.375	44.8	159.949	3.57029	1.83604	2.84989e-12	3.50288e-11
DLGAP5	ENSG00000126787	123.538	188.972	58.1034	0.307471	-1.70148	2.2639e-11	2.5929e-10
PLEKHG3	ENSG00000126822	262.133	372.149	152.116	0.408749	-1.29071	4.9153e-13	6.39468e-12
OMG	ENSG00000126861	6.24908	12.4982	0	0	#NUM!	0.0082517	0.0332671
FAM78A	ENSG00000126882	1311.34	1893.41	729.276	0.385166	-1.37645	1.04494e-35	3.32651e-34
ARMCX1	ENSG00000126947	34.3555	12.7023	56.0086	4.40934	2.14056	2.71829e-06	1.94855e-05
ZC4H2	ENSG00000126970	39.0825	52.4275	25.7376	0.490917	-1.02645	0.0129469	0.0495699
RGS13	ENSG00000127074	148.063	34.6046	261.521	7.55741	2.91789	6.97797e-19	1.27829e-17
ABHD8	ENSG00000127220	245.958	342.655	149.261	0.4356	-1.19892	4.7432e-11	5.31179e-10
HELB	ENSG00000127311	134.828	55.6797	213.977	3.843	1.94223	4.44224e-11	4.9873e-10
AUNIP	ENSG00000127423	48.5139	71.6342	25.3935	0.354488	-1.49619	0.000195205	0.00107989
EMR2	ENSG00000127507	3893.17	2523.21	5263.13	2.08589	1.06066	7.54235e-24	1.65665e-22
SYNGR3	ENSG00000127561	14.1443	3.28279	25.0057	7.61722	2.92926	0.000732172	0.00369811
TICAM1	ENSG00000127666	985.173	493.286	1477.06	2.99433	1.58223	1.08541e-25	2.53855e-24
GNG11	ENSG00000127920	638.059	403.191	872.927	2.16505	1.1144	2.01867e-18	3.61857e-17
POR	ENSG00000127948	1794.55	1085.5	2503.61	2.30641	1.20565	2.86074e-32	8.27816e-31
FGL2	ENSG00000127951	7.12293	0.301214	13.9447	46.2949	5.53278	0.000174785	0.000975006
STEAP4	ENSG00000127954	21.8567	0.44418	43.2691	97.4135	6.60605	2.22319e-14	3.16689e-13
GNAI1	ENSG00000127955	114.315	173.697	54.9328	0.316257	-1.66083	1.68102e-10	1.80823e-09
ZFP36	ENSG00000128016	2813.36	1811.21	3815.52	2.10662	1.07493	1.59823e-12	2.00221e-11
PPAT	ENSG00000128059	90.5668	126.201	54.9328	0.435281	-1.19998	2.07611e-05	0.00013288
ADM2	ENSG00000128165	368.265	645.902	90.627	0.140311	-2.8333	4.452e-58	2.2867e-56
ASPHD2	ENSG00000128203	103.119	30.9235	175.314	5.66927	2.50316	1.13426e-19	2.16238e-18
ADORA2A	ENSG00000128271	12.7177	1.34782	24.0876	17.8715	4.15959	4.65502e-06	3.23189e-05
ATF4	ENSG00000128272	8903.55	12466.4	5340.74	0.428412	-1.22293	6.1697e-44	2.40916e-42
A4GALT	ENSG00000128274	465.441	176.903	753.979	4.26211	2.09157	3.69296e-46	1.50588e-44
CDC42EP1	ENSG00000128283	450.805	621.523	280.087	0.450646	-1.14993	5.38421e-15	7.8928e-14
APOL3	ENSG00000128284	62.3366	14.4637	110.21	7.61974	2.92974	1.1173e-16	1.83193e-15
MPST	ENSG00000128309	773.887	1148.28	399.493	0.347905	-1.52323	2.66763e-33	7.93426e-32
TST	ENSG00000128311	623	872.031	373.97	0.42885	-1.22146	1.91154e-20	3.73211e-19
APOL2	ENSG00000128335	1712.87	344.565	3081.18	8.94222	3.16063	2.03387e-101	2.04991e-99
LIF	ENSG00000128342	35.5568	2.23618	68.8774	30.8013	4.94492	2.44934e-18	4.3642e-17
APOBEC3A	ENSG00000128383	109.213	0	218.425	#DIV/0!	#DIV/0!	6.58807e-71	4.28129e-69
APOBEC3F	ENSG00000128394	395.715	73.7886	717.641	9.72563	3.28179	6.22653e-86	4.92025e-84
RIBC2	ENSG00000128408	30.3558	45.2748	15.4368	0.340959	-1.55233	0.0013728	0.0065663
DOCK4	ENSG00000128512	1101.38	219.354	1983.4	9.04199	3.17664	2.85739e-142	4.79988e-140
VGF	ENSG00000128564	37.3893	52.7135	22.0651	0.418586	-1.2564	0.00544771	0.022979
IRF5	ENSG00000128604	2185.34	1421.56	2949.12	2.07456	1.05281	8.84455e-27	2.15341e-25
MYO1B	ENSG00000128641	257.439	155.511	359.366	2.31087	1.20843	1.70691e-12	2.13237e-11
ARHGAP22	ENSG00000128805	359.582	91.678	627.487	6.84446	2.77494	1.94638e-62	1.11319e-60
TMOD2	ENSG00000128872	33.1783	16.904	49.4526	2.9255	1.54868	0.000552885	0.00284912
DLL4	ENSG00000128917	240.158	31.4135	448.902	14.2901	3.83694	1.59243e-72	1.06065e-70
FAM63B	ENSG00000128923	574.281	834.934	313.627	0.375631	-1.41261	5.09021e-20	9.79498e-19
KNSTRN	ENSG00000128944	199.64	275.886	123.394	0.447263	-1.1608	2.74199e-09	2.67969e-08
DUT	ENSG00000128951	560.446	752.932	367.96	0.488702	-1.03297	6.77389e-14	9.28767e-13
CHAC1	ENSG00000128965	256.49	448.378	64.6024	0.14408	-2.79506	1.09846e-43	4.27055e-42
SERGEF	ENSG00000129158	64.1614	92.3416	35.9813	0.389654	-1.35973	6.36766e-05	0.000378783
CSRP3	ENSG00000129170	77.5794	146.092	9.06707	0.0620642	-4.01009	2.05323e-24	4.62782e-23
E2F8	ENSG00000129173	169.289	300.316	38.2623	0.127407	-2.97249	1.26306e-33	3.79472e-32
FAM64A	ENSG00000129195	45.9715	80.1501	11.7929	0.147135	-2.76479	4.85768e-10	5.04251e-09
RPAIN	ENSG00000129197	160.207	223.806	96.609	0.431664	-1.21202	1.28124e-08	1.17395e-07
PLD2	ENSG00000129219	213.6	118.349	308.851	2.60967	1.38387	9.59861e-13	1.2243e-11
CCL4	ENSG00000129277	4425.01	42.4056	8807.62	207.699	7.69835	0	0
MTUS1	ENSG00000129422	40.2154	62.2966	18.1341	0.291094	-1.78044	0.00697548	0.0286804
KLK10	ENSG00000129451	31.9395	6.85151	57.0275	8.32335	3.05716	2.72198e-10	2.87926e-09
AJUBA	ENSG00000129474	219.63	293.255	146.005	0.497875	-1.00614	1.71149e-07	1.39835e-06
FOXA1	ENSG00000129514	186.348	52.6676	320.028	6.07637	2.60321	2.59128e-35	8.17127e-34
SNX6	ENSG00000129515	1346.64	668.096	2025.19	3.03129	1.59993	7.024e-49	3.08559e-47
MIS18BP1	ENSG00000129534	293.016	408.566	177.466	0.434362	-1.20303	1.61505e-08	1.46622e-07
RHBDF2	ENSG00000129667	3858.9	1353.34	6364.46	4.70276	2.23351	3.66154e-73	2.48213e-71
AANAT	ENSG00000129673	11.9273	3.56872	20.2859	5.68436	2.507	0.00108538	0.0052997
MAP7D3	ENSG00000129680	174.001	238.525	109.478	0.458978	-1.1235	4.79243e-08	4.13574e-07
LPPR3	ENSG00000129951	1813.59	2806.67	820.523	0.292348	-1.77424	1.88082e-36	6.08169e-35
CBFA2T3	ENSG00000129993	1091.55	1537.89	645.205	0.419539	-1.25312	6.14837e-28	1.55361e-26
GAMT	ENSG00000130005	801.847	1070.79	532.9	0.497668	-1.00674	1.04209e-16	1.70965e-15
EFCAB4B	ENSG00000130038	135.733	189.691	81.7747	0.431093	-1.21393	1.99415e-05	0.000128033
FAM155B	ENSG00000130054	53.5129	77.3573	29.6685	0.383526	-1.3826	0.000142945	0.000808881
GDPD2	ENSG00000130055	16.5871	29.6881	3.48616	0.117426	-3.09017	4.76992e-05	0.000289085
SAT1	ENSG00000130066	6591.95	743.038	12440.9	16.7433	4.06551	0	0
THEM6	ENSG00000130193	181.766	279.792	83.7402	0.299294	-1.74036	2.0217e-16	3.26073e-15
APOE	ENSG00000130203	2974.06	1392.32	4555.8	3.2721	1.71022	3.57184e-69	2.27144e-67
APOC1	ENSG00000130208	460.051	240.379	679.722	2.82771	1.49963	1.15542e-26	2.80037e-25
ATP8B3	ENSG00000130270	847.881	1242.83	452.933	0.364438	-1.45626	2.65648e-32	7.71216e-31
BST2	ENSG00000130303	7070.52	3865.86	10275.2	2.65793	1.4103	1.77533e-54	8.63703e-53
TULP4	ENSG00000130338	326.472	213.008	439.935	2.06535	1.04638	6.54143e-11	7.24657e-10
SNX9	ENSG00000130340	2971.68	1756.08	4187.28	2.38444	1.25365	5.273e-34	1.59498e-32
ZSWIM6	ENSG00000130449	746.69	353.106	1140.27	3.22927	1.69121	5.82193e-42	2.19011e-40
FCHO1	ENSG00000130475	197.234	265.737	128.732	0.484432	-1.04563	1.93197e-07	1.5689e-06
KLHDC7B	ENSG00000130487	87.8686	8.3423	167.395	20.0658	4.32667	5.15295e-37	1.69287e-35
KIAA1683	ENSG00000130518	208.905	115.199	302.61	2.62685	1.39333	2.18046e-13	2.89886e-12
HRC	ENSG00000130528	7.18336	13.7642	0.602571	0.0437783	-4.51364	0.00175451	0.00822126
HELZ2	ENSG00000130589	18829	3062.42	34595.5	11.2968	3.49784	0	0
SAMD10	ENSG00000130590	324.901	487.527	162.274	0.332851	-1.58705	2.10196e-20	4.09791e-19
LSP1	ENSG00000130592	94.8875	34.5893	155.186	4.48652	2.1656	3.43983e-15	5.10414e-14
PNPLA7	ENSG00000130653	146.529	225.859	67.199	0.297526	-1.74891	1.04215e-13	1.41079e-12
MNX1	ENSG00000130675	44.846	71.5578	18.1341	0.25342	-1.9804	0.000614745	0.00315027
ASS1	ENSG00000130707	2584.47	3490.17	1678.77	0.481001	-1.05589	1.4188e-12	1.78918e-11
PRDM12	ENSG00000130711	7.32609	13.8918	0.76034	0.0547329	-4.19145	0.00173529	0.00813978
NPAS1	ENSG00000130751	53.7459	80.1042	27.3875	0.341898	-1.54836	3.90282e-05	0.000239798
ARHGEF16	ENSG00000130762	49.2642	71.1693	27.359	0.384421	-1.37924	0.00157971	0.00746374
THEMIS2	ENSG00000130775	2765.8	880.542	4651.07	5.28205	2.4011	1.15573e-126	1.61614e-124
PPAN	ENSG00000130810	66.4095	89.2629	43.5562	0.487954	-1.03518	0.00489793	0.0208742
ANGPTL6	ENSG00000130812	276.574	166.912	386.236	2.31402	1.2104	8.97527e-13	1.14809e-11
C19orf66	ENSG00000130813	1688.71	440.021	2937.4	6.67561	2.7389	3.09677e-137	4.78102e-135
DUSP9	ENSG00000130829	24.6636	37.9791	11.3481	0.298798	-1.74276	0.00134567	0.00645154
LRP3	ENSG00000130881	884.617	1323.85	445.387	0.336434	-1.5716	1.39241e-37	4.64874e-36
PRRG1	ENSG00000130962	124.943	78.6898	171.197	2.17559	1.1214	2.11381e-06	1.53627e-05
TXLNG2P	ENSG00000131002	137.639	185.985	89.2926	0.480106	-1.05858	4.14178e-06	2.89892e-05
AKAP12	ENSG00000131016	12.1152	0.745394	23.485	31.5069	4.97759	6.95714e-07	5.33654e-06
ULBP3	ENSG00000131019	13.4143	23.5001	3.32839	0.141633	-2.81977	0.00186871	0.00871815
LILRB2	ENSG00000131042	39.7062	11.9263	67.486	5.65858	2.50044	2.66317e-09	2.60457e-08
ARHGEF9	ENSG00000131089	206.251	279.884	132.619	0.473834	-1.07754	2.23787e-08	2.00642e-07
ZNF141	ENSG00000131127	67.7582	96.5946	38.9219	0.402941	-1.31136	4.25625e-05	0.0002599
GSE1	ENSG00000131149	1866.59	2948.25	784.925	0.266234	-1.90923	4.08062e-73	2.75922e-71
GINS2	ENSG00000131153	187.313	260.356	114.27	0.438898	-1.18804	2.17437e-08	1.95343e-07
IDO1	ENSG00000131203	814.105	0	1628.21	#DIV/0!	#DIV/0!	0	0
EMR3	ENSG00000131355	13.7726	0.602428	26.9427	44.7235	5.48296	4.15232e-08	3.60664e-07
RFTN1	ENSG00000131378	3039.67	1160.49	4918.84	4.23857	2.08358	1.52604e-100	1.51521e-98
SLC6A6	ENSG00000131389	2354.38	1002.5	3706.27	3.69705	1.88637	1.85687e-78	1.33679e-76
GFPT2	ENSG00000131459	43.1812	5.53425	80.8281	14.6051	3.8684	9.14764e-17	1.50539e-15
BARX1	ENSG00000131668	2332.11	3218.29	1445.93	0.449285	-1.1543	9.38524e-31	2.58157e-29
NINJ1	ENSG00000131669	5919.82	1113.6	10726	9.63187	3.26782	5.07267e-49	2.23944e-47
IL13RA1	ENSG00000131724	1402.86	872.931	1932.79	2.21414	1.14674	2.30219e-27	5.69344e-26
TOP2A	ENSG00000131747	665.272	968.957	361.588	0.373172	-1.42209	2.66139e-28	6.80872e-27
KHDRBS3	ENSG00000131773	168.716	51.4933	285.94	5.55295	2.47325	1.73422e-29	4.59516e-28
FMO5	ENSG00000131781	31.439	43.7687	19.1093	0.436596	-1.19563	0.00672624	0.0277797
LLGL1	ENSG00000131899	465.756	309.246	622.265	2.0122	1.00878	3.25947e-13	4.278e-12
GCH1	ENSG00000131979	479.208	36.9838	921.433	24.9145	4.63892	9.53262e-156	1.73202e-153
ZSWIM4	ENSG00000132003	978.815	531.372	1426.26	2.6841	1.42444	4.39021e-35	1.37951e-33
C19orf57	ENSG00000132016	33.1031	46.9391	19.267	0.410469	-1.28466	0.0120794	0.0466225
MATN3	ENSG00000132031	6.64963	0.301214	12.998	43.1522	5.43136	0.000197538	0.00109235
TRIM21	ENSG00000132109	4067.18	1467.5	6666.86	4.54301	2.18365	3.37132e-115	4.09293e-113
LHX1	ENSG00000132130	6.51327	0	13.0265	#DIV/0!	#DIV/0!	5.30489e-05	0.000319536
PPARG	ENSG00000132170	165.015	225.588	104.442	0.462978	-1.11098	2.31178e-07	1.8598e-06
TRIM5	ENSG00000132256	995.118	280.696	1709.54	6.09036	2.60653	2.36359e-101	2.37328e-99
TRIM22	ENSG00000132274	3752.64	415.025	7090.26	17.0839	4.09457	1.071e-163	2.05795e-161
EFR3A	ENSG00000132294	1445.75	899.29	1992.21	2.21532	1.14751	5.44351e-28	1.37681e-26
CARD6	ENSG00000132357	667.828	297.085	1038.57	3.49587	1.80565	6.78285e-45	2.69588e-43
RAP1GAP2	ENSG00000132359	383.186	519.456	246.917	0.475338	-1.07297	1.67759e-12	2.09769e-11
TBC1D14	ENSG00000132405	1058.49	1610.64	506.344	0.314375	-1.66944	4.20356e-47	1.75701e-45
POPDC3	ENSG00000132429	26.3212	13.1464	39.4959	3.00431	1.58703	0.00162333	0.0076509
KDM6B	ENSG00000132510	2149.7	593.347	3706.05	6.24601	2.64293	2.16793e-81	1.60843e-79
XAF1	ENSG00000132530	3228.25	1474.65	4981.86	3.37834	1.75631	1.11789e-09	1.12671e-08
MTSS1L	ENSG00000132613	647.893	908.729	387.056	0.425931	-1.23131	2.50552e-17	4.2408e-16
SNAP25	ENSG00000132639	119.978	24.7868	215.169	8.68079	3.11783	8.43511e-32	2.41213e-30
RIN2	ENSG00000132669	750.611	219.39	1281.83	5.8427	2.54663	2.52934e-86	2.0106e-84
NES	ENSG00000132688	231.865	328.442	135.288	0.411907	-1.27961	9.80925e-12	1.15978e-10
BCAN	ENSG00000132692	46.1222	77.2809	14.9635	0.193625	-2.36866	4.37818e-08	3.79665e-07
ARHGEF11	ENSG00000132694	1010.42	550.385	1470.46	2.67169	1.41775	1.97364e-34	6.07305e-33
MTL5	ENSG00000132749	279.194	407.535	150.854	0.370161	-1.43378	8.62979e-16	1.33079e-14
CTNNBL1	ENSG00000132792	1144.15	653.085	1635.22	2.50384	1.32414	3.53249e-22	7.30257e-21
RBM38	ENSG00000132819	945.097	1402.64	487.552	0.347595	-1.52452	1.21705e-36	3.94492e-35
ZBED3	ENSG00000132846	33.2693	56.1086	10.43	0.185889	-2.42749	1.90068e-06	1.38703e-05
SYT4	ENSG00000132872	35.7224	0.44418	71.0007	159.847	7.32054	2.81079e-23	6.01069e-22
MTUS2	ENSG00000132938	43.8188	67.0647	20.5729	0.306762	-1.70481	3.72626e-05	0.00022969
USPL1	ENSG00000132952	397.379	205.432	589.325	2.86871	1.5204	4.24575e-24	9.4421e-23
CHRM3	ENSG00000133019	163.93	276.729	51.1311	0.184769	-2.4362	6.24435e-25	1.42547e-23
SCO1	ENSG00000133028	391.632	218.43	564.835	2.58588	1.37066	5.28778e-19	9.78056e-18
MPRIP	ENSG00000133030	2545.61	3407.35	1683.86	0.494185	-1.01688	1.01751e-25	2.3881e-24
PIK3C2B	ENSG00000133056	225.372	332.184	118.56	0.356911	-1.48636	2.67004e-14	3.77923e-13
CHIT1	ENSG00000133063	61.3304	16.6693	105.992	6.35848	2.66868	9.40552e-15	1.36826e-13
TMCC2	ENSG00000133069	53.4188	72.1908	34.6469	0.479934	-1.05909	0.00478491	0.0204317
EPSTI1	ENSG00000133106	3448.85	400.392	6497.3	16.2273	4.02035	6.64679e-107	7.12968e-105
EPHB2	ENSG00000133216	116.66	32.8279	200.493	6.10738	2.61055	3.57811e-24	7.98393e-23
PRAM1	ENSG00000133246	40.2634	69.1787	11.3481	0.16404	-2.60788	2.5622e-06	1.84209e-05
CNDP2	ENSG00000133313	8984.81	3599.17	14370.5	3.99272	1.99737	3.16649e-108	3.49478e-106
HRASLS2	ENSG00000133328	8.91577	1.18957	16.642	13.9899	3.80631	0.00016228	0.000909808
GIMAP4	ENSG00000133574	29.3782	7.59691	51.1596	6.73426	2.75152	3.12464e-08	2.7516e-07
AGAP3	ENSG00000133612	3671.14	2445.23	4897.04	2.00269	1.00194	6.52502e-27	1.59887e-25
ZNF767	ENSG00000133624	80.1078	108.138	52.0777	0.481586	-1.05413	0.000308526	0.00165604
BTG1	ENSG00000133639	3288.77	1116.16	5461.37	4.89301	2.29072	1.17734e-46	4.87528e-45
ATP13A3	ENSG00000133657	4028.96	2580.31	5477.62	2.12285	1.086	1.62817e-31	4.59206e-30
SWAP70	ENSG00000133789	1531.86	734.338	2329.38	3.17208	1.66543	4.45052e-29	1.1631e-27
AMPD3	ENSG00000133805	5804.68	485.827	11123.5	22.8961	4.51703	7.56097e-196	2.19506e-193
SBF2	ENSG00000133812	132.18	87.1085	177.251	2.03483	1.02491	1.20734e-05	7.93474e-05
RNF122	ENSG00000133874	437.64	232.787	642.494	2.76001	1.46467	4.2985e-24	9.54491e-23
UNC79	ENSG00000133958	57.137	36.7742	77.4997	2.10744	1.07549	0.00205915	0.00951685
TTC9	ENSG00000133985	23.7905	6.85151	40.7296	5.94461	2.57158	2.72882e-06	1.95504e-05
ADAMDEC1	ENSG00000134028	419.66	41.885	797.435	19.0387	4.25086	2.57171e-128	3.63428e-126
CCNB1	ENSG00000134057	789.443	1090.2	488.685	0.448252	-1.15762	1.32191e-20	2.59038e-19
IRAK2	ENSG00000134070	1574.27	139.015	3009.52	21.6488	4.43622	1.93914e-226	7.39893e-224
CAMK1	ENSG00000134072	911.049	1322.31	499.79	0.377967	-1.40367	3.53372e-31	9.81104e-30
BHLHE40	ENSG00000134107	4187.34	1492.42	6882.26	4.61148	2.20523	5.19234e-118	6.54162e-116
EDEM1	ENSG00000134109	5524.46	3548.94	7499.99	2.11331	1.0795	1.0039e-32	2.94976e-31
PSRC1	ENSG00000134222	205.707	327.788	83.6262	0.255123	-1.97074	2.09542e-21	4.21753e-20
NOTCH2	ENSG00000134250	9199.16	5463.97	12934.3	2.36721	1.24319	4.54655e-45	1.81245e-43
PLEKHA8P1	ENSG00000134297	172.808	100.219	245.396	2.4486	1.29196	2.6322e-09	2.57616e-08
RSAD2	ENSG00000134321	7054.56	258.809	13850.3	53.5156	5.74189	0	0
CMPK2	ENSG00000134326	7017.33	969.443	13065.2	13.477	3.75243	8.24294e-111	9.36855e-109
FST	ENSG00000134363	28.4746	7.75515	49.1941	6.34341	2.66526	1.47673e-07	1.21697e-06
NAV1	ENSG00000134369	324.516	100.796	548.237	5.43905	2.44336	4.87386e-47	2.034e-45
CDC73	ENSG00000134371	916.123	475.83	1356.42	2.85063	1.51128	7.05674e-37	2.30133e-35
IL15RA	ENSG00000134470	1386.26	100.592	2671.92	26.5619	4.73129	1.70786e-287	9.30922e-285
DDB2	ENSG00000134574	362.721	236.514	488.928	2.06723	1.0477	1.15739e-11	1.36239e-10
YARS	ENSG00000134684	2836.2	4124.71	1547.69	0.375223	-1.41418	1.61614e-47	6.84081e-46
CDCA8	ENSG00000134690	354.955	501.827	208.083	0.41465	-1.27003	2.70874e-13	3.57273e-12
AGO4	ENSG00000134698	625.859	838.826	412.892	0.492226	-1.02261	8.90168e-15	1.29637e-13
CYP2J2	ENSG00000134716	14.9777	0.602428	29.353	48.7245	5.60657	6.093e-09	5.76063e-08
FADS2	ENSG00000134824	2201.35	3611.89	790.81	0.218947	-2.19135	2.50546e-96	2.3398e-94
C5AR2	ENSG00000134830	1524.75	619.241	2430.27	3.92459	1.97254	1.31539e-74	9.10174e-73
PDGFRA	ENSG00000134853	15.1625	4.17115	26.1539	6.27018	2.64851	0.000140387	0.000795079
COL4A2	ENSG00000134871	44.9192	19.7273	70.1111	3.55401	1.82945	4.5329e-06	3.15531e-05
CARS2	ENSG00000134905	949.949	1302.54	597.358	0.45861	-1.12466	3.97023e-22	8.16327e-21
ARHGAP32	ENSG00000134909	158.256	213.361	103.152	0.483462	-1.04853	2.8257e-06	2.02228e-05
ADAMTS8	ENSG00000134917	59.2953	36.7437	81.847	2.22751	1.15543	0.000443432	0.00232137
ETS1	ENSG00000134954	1213	768.141	1657.85	2.15826	1.10987	3.59816e-24	8.02198e-23
SLC37A2	ENSG00000134955	1854.49	1018.8	2690.18	2.64054	1.40083	2.04543e-42	7.79335e-41
CTSL	ENSG00000135047	17543	11530	23556	2.04302	1.0307	2.31963e-11	2.65332e-10
AGTPBP1	ENSG00000135049	85.9568	118.732	53.1821	0.447918	-1.15869	2.98833e-05	0.000186833
PSAT1	ENSG00000135069	900.056	1707.62	92.4917	0.0541641	-4.20652	4.49485e-176	9.84041e-174
ADAM19	ENSG00000135074	49.0986	23.2655	74.9316	3.22072	1.68739	3.78172e-06	2.66085e-05
HAVCR2	ENSG00000135077	3047.08	1273.32	4820.84	3.78604	1.92069	5.27149e-88	4.26655e-86
USP30	ENSG00000135093	214.875	130.74	299.01	2.28706	1.1935	9.28635e-11	1.01818e-09
SDS	ENSG00000135094	1142.58	218.149	2067.02	9.47523	3.24416	4.12369e-117	5.12277e-115
TBX3	ENSG00000135111	428.387	128.33	728.443	5.67633	2.50496	3.22217e-60	1.74921e-58
OASL	ENSG00000135114	5366.5	184.944	10548.1	57.0338	5.83375	0	0
P2RX4	ENSG00000135124	2148.14	1060.87	3235.42	3.0498	1.60871	4.02118e-57	2.03412e-55
TRAFD1	ENSG00000135148	4478.39	1055.89	7900.89	7.48266	2.90355	3.96869e-194	1.11579e-191
CCDC146	ENSG00000135205	22.6275	10.2926	34.9624	3.39686	1.7642	0.00104876	0.005135
EPHA7	ENSG00000135333	20.3718	0.903642	39.84	44.0882	5.46232	3.03161e-11	3.43682e-10
PRR5L	ENSG00000135362	525.58	723.816	327.344	0.452248	-1.14482	2.66342e-16	4.26482e-15
TROAP	ENSG00000135451	94.3703	133.435	55.3053	0.414473	-1.27065	2.76931e-06	1.98299e-05
HEY2	ENSG00000135547	36.5032	63.6237	9.38261	0.14747	-2.7615	1.83865e-08	1.66188e-07
PKIB	ENSG00000135549	564.535	213.305	915.765	4.29322	2.10206	2.05984e-53	9.87727e-52
STX11	ENSG00000135604	1045.01	113.294	1976.73	17.4477	4.12497	1.1482e-211	3.8334e-209
TEC	ENSG00000135605	908.426	1267.11	549.742	0.433855	-1.20471	1.94654e-24	4.39105e-23
DYSF	ENSG00000135636	170.365	306.141	34.5898	0.112987	-3.14578	3.40606e-30	9.20774e-29
USP15	ENSG00000135655	926.968	563.316	1290.62	2.29111	1.19605	6.76091e-07	5.19796e-06
FBXL8	ENSG00000135722	59.4704	28.9885	89.9522	3.10303	1.63368	2.38614e-06	1.72276e-05
GLUL	ENSG00000135821	6268.75	3979.56	8557.94	2.15047	1.10465	7.63019e-31	2.10532e-29
RNASEL	ENSG00000135828	773.992	386.68	1161.3	3.00327	1.58653	2.67e-37	8.86977e-36
KIAA1614	ENSG00000135835	85.0046	131.245	38.7641	0.295357	-1.75947	3.35006e-09	3.23957e-08
NPL	ENSG00000135838	333.316	118.553	548.079	4.62308	2.20886	1.58075e-39	5.5773e-38
GPR55	ENSG00000135898	71.1989	122.27	20.1281	0.164621	-2.60278	1.03236e-13	1.39824e-12
SP110	ENSG00000135899	3444.49	845.131	6043.86	7.15139	2.83822	2.98905e-176	6.65288e-174
TTLL4	ENSG00000135912	492.056	318.191	665.922	2.09284	1.06546	3.91464e-15	5.79579e-14
SERPINE2	ENSG00000135919	4399.06	595.083	8203.05	13.7847	3.785	3.18289e-220	1.18072e-217
CYP27A1	ENSG00000135929	60.2628	34.1452	86.3805	2.5298	1.33902	2.37723e-05	0.000150924
ALDH1L2	ENSG00000136010	447.56	787.22	107.9	0.137065	-2.86707	5.8137e-68	3.60274e-66
CKAP4	ENSG00000136026	847.418	539.556	1155.28	2.14117	1.0984	2.37096e-20	4.61559e-19
APPL2	ENSG00000136044	104.271	154.24	54.3017	0.35206	-1.50611	3.28764e-08	2.88752e-07
DRAM1	ENSG00000136048	565.285	143.947	986.623	6.85406	2.77696	8.62706e-84	6.64035e-82
KIAA1033	ENSG00000136051	965.166	507.606	1422.73	2.80282	1.48688	2.33745e-36	7.54909e-35
SLC41A2	ENSG00000136052	234.339	46.1326	422.546	9.15939	3.19525	6.25968e-56	3.10762e-54
CKAP2	ENSG00000136108	521.967	716.464	327.471	0.457066	-1.12952	3.37615e-12	4.12882e-11
LRCH1	ENSG00000136141	748.722	430.841	1066.6	2.47563	1.3078	1.05825e-25	2.48154e-24
PHF11	ENSG00000136147	1003.19	391.464	1614.91	4.12532	2.04451	5.94328e-69	3.74385e-67
LMO7	ENSG00000136153	58.6247	78.3275	38.9219	0.496912	-1.00894	0.00327195	0.014471
EDNRB	ENSG00000136160	7.41668	1.64904	13.1843	7.99517	2.99913	0.00777353	0.0315681
SETDB2	ENSG00000136169	390.297	537.32	243.273	0.452753	-1.1432	7.88504e-14	1.07559e-12
SCRN1	ENSG00000136193	239.195	152.223	326.167	2.14269	1.09943	1.38072e-09	1.37654e-08
IL6	ENSG00000136244	141.026	0	282.052	#DIV/0!	#DIV/0!	6.79867e-90	5.74638e-88
RP11-84C10.2	ENSG00000136315	220.292	344.606	95.9779	0.278515	-1.84417	1.15167e-20	2.2601e-19
ZFHX2	ENSG00000136367	145.758	87.8234	203.692	2.31933	1.21371	3.86235e-08	3.36572e-07
ALPK3	ENSG00000136383	149.57	98.1465	200.994	2.0479	1.03415	2.54687e-06	1.83206e-05
TM6SF1	ENSG00000136404	200.198	315.48	84.9168	0.269167	-1.89342	9.65423e-20	1.84314e-18
MYCBPAP	ENSG00000136449	23.9026	34.9364	12.8688	0.368349	-1.44086	0.00855887	0.0343913
RTP4	ENSG00000136514	855.615	151.621	1559.61	10.2863	3.36265	3.01608e-142	5.03478e-140
TANK	ENSG00000136560	1167.38	734.282	1600.48	2.17965	1.1241	5.66253e-24	1.24992e-22
SKIL	ENSG00000136603	561.36	226.165	896.555	3.96415	1.98701	4.12616e-48	1.77465e-46
EPRS	ENSG00000136628	2420.87	3488.5	1353.24	0.387916	-1.36619	3.43564e-44	1.35343e-42
HLX	ENSG00000136630	2539.48	1412.51	3666.45	2.59571	1.37613	8.85539e-39	3.044e-37
IL10	ENSG00000136634	12.8613	0.745394	24.9772	33.5087	5.06647	1.74554e-07	1.42487e-06
RASSF5	ENSG00000136653	3384.64	1674.82	5094.47	3.04181	1.60493	1.49543e-63	8.66412e-62
IL36G	ENSG00000136688	16.4842	0	32.9684	#DIV/0!	#DIV/0!	4.06613e-12	4.94546e-11
IL1RN	ENSG00000136689	15974.1	608.01	31340.1	51.5454	5.68777	5.81776e-165	1.13421e-162
HS6ST1	ENSG00000136720	461.476	635.303	287.649	0.452774	-1.14314	9.28102e-12	1.10025e-10
KIAA0368	ENSG00000136813	1760.28	1173.23	2347.33	2.00075	1.00054	3.21611e-18	5.7038e-17
TOR1B	ENSG00000136816	2636.01	1052.69	4219.34	4.00814	2.00293	6.4334e-91	5.5429e-89
KLF4	ENSG00000136826	237.864	353.438	122.29	0.346	-1.53116	4.96383e-16	7.80336e-15
DAB2IP	ENSG00000136848	49.2969	71.5218	27.072	0.378513	-1.40158	0.000305522	0.00164222
SLC31A2	ENSG00000136867	50.8366	16.5416	85.1316	5.1465	2.36359	2.4927e-06	1.79551e-05
TLR4	ENSG00000136869	300.202	149.293	451.111	3.02165	1.59534	1.7471e-21	3.52975e-20
STX17	ENSG00000136874	296.523	136.325	456.72	3.35022	1.74426	1.62995e-25	3.7889e-24
ANP32B	ENSG00000136938	1741.05	2481.08	1001.01	0.403457	-1.30951	9.60077e-31	2.63814e-29
ENPP2	ENSG00000136960	25.2642	0	50.5285	#DIV/0!	#DIV/0!	4.60143e-18	8.09082e-17
DSCC1	ENSG00000136982	70.681	94.736	46.626	0.492168	-1.02278	0.000855241	0.00426248
IL33	ENSG00000137033	12.2584	1.18957	23.3273	19.6098	4.2935	2.49536e-06	1.79694e-05
CCL21	ENSG00000137077	42.9655	20.6975	65.2335	3.15176	1.65616	1.16564e-05	7.67963e-05
SIT1	ENSG00000137078	55.927	79.3588	32.4951	0.409471	-1.28817	0.00179361	0.00839268
DNAJB5	ENSG00000137094	137.587	81.1814	193.994	2.38963	1.25679	1.51923e-08	1.38216e-07
GRHPR	ENSG00000137106	1353.47	1906.92	800.022	0.419537	-1.25313	4.98459e-14	6.8981e-13
ARHGEF39	ENSG00000137135	167.539	258.237	76.8401	0.297556	-1.74876	4.30429e-15	6.34456e-14
KIF13A	ENSG00000137177	40.8081	19.3955	62.2206	3.20799	1.68167	2.9648e-05	0.000185492
GMPR	ENSG00000137198	513.648	77.5003	949.796	12.2554	3.61534	7.55591e-118	9.43042e-116
CMTR1	ENSG00000137200	4361.84	1601.51	7122.17	4.44717	2.15289	2.56783e-112	3.03469e-110
TMEM63B	ENSG00000137216	1653.07	1055.55	2250.59	2.13215	1.09231	1.58956e-26	3.84213e-25
IRF4	ENSG00000137265	51.7902	1.63375	101.947	62.4002	5.96348	2.43693e-24	5.47419e-23
SLC22A23	ENSG00000137266	61.4017	84.0964	38.7071	0.46027	-1.11945	0.00122744	0.00593802
TUBB2A	ENSG00000137267	82.9499	23.8832	142.017	5.9463	2.57199	1.42134e-09	1.41493e-08
RIPK1	ENSG00000137275	696.363	303.828	1088.9	3.58393	1.84154	5.3247e-46	2.16136e-44
IER3	ENSG00000137331	1819.44	240.94	3397.95	14.1029	3.81792	3.52173e-42	1.32668e-40
RNF144B	ENSG00000137393	43.0522	3.12454	82.9798	26.5574	4.73104	4.08033e-21	8.10272e-20
FAM8A1	ENSG00000137414	271.662	168.852	374.472	2.21775	1.1491	7.10891e-12	8.51825e-11
FGFBP2	ENSG00000137441	5.0566	0.88836	9.22484	10.3841	3.37631	0.0088859	0.0355556
CPEB2	ENSG00000137449	1705.62	913.744	2497.5	2.73326	1.45062	9.84465e-41	3.597e-39
TLR2	ENSG00000137462	1483.78	904.12	2063.44	2.28227	1.19047	1.26451e-29	3.37063e-28
SLCO2B1	ENSG00000137491	235.186	121.953	348.419	2.85699	1.51449	8.66326e-17	1.42832e-15
CREBZF	ENSG00000137504	435.333	637.722	232.944	0.365275	-1.45295	1.65854e-22	3.4689e-21
LRRC32	ENSG00000137507	57.1753	6.26437	108.086	17.2542	4.10887	1.57006e-23	3.4038e-22
PI15	ENSG00000137558	105.761	24.0567	187.466	7.79267	2.96212	2.27375e-26	5.46128e-25
SLCO5A1	ENSG00000137571	14.7402	1.33254	28.1478	21.1234	4.40077	6.2128e-08	5.30661e-07
DDX60	ENSG00000137628	812.26	283.672	1340.85	4.72675	2.24085	1.63318e-28	4.19428e-27
MMP7	ENSG00000137673	234.678	41.9462	427.411	10.1895	3.34901	1.39965e-60	7.70787e-59
YAP1	ENSG00000137693	70.4774	35.0641	105.891	3.01992	1.59451	0.000644889	0.00328521
RDX	ENSG00000137710	614.035	357.124	870.946	2.43878	1.28616	3.5733e-22	7.38123e-21
FXYD6	ENSG00000137726	27.3986	8.96001	45.8372	5.11575	2.35495	3.24168e-06	2.30394e-05
ARHGAP20	ENSG00000137727	39.3113	17.5064	61.1162	3.49108	1.80367	1.80427e-05	0.000116425
MMP13	ENSG00000137745	160.355	10.1649	310.544	30.5508	4.93314	8.09722e-70	5.19876e-68
TMPRSS13	ENSG00000137747	54.7998	11.8139	97.7856	8.27716	3.04914	3.15018e-15	4.6952e-14
CASP1	ENSG00000137752	1435.9	321.636	2550.17	7.92874	2.98709	2.56549e-52	1.20003e-50
CASP5	ENSG00000137757	121.303	7.43866	235.168	31.6143	4.9825	6.44782e-57	3.24322e-55
UNC13C	ENSG00000137766	6.49148	1.34782	11.6351	8.63254	3.10979	0.00684374	0.0282039
SQRDL	ENSG00000137767	2181.46	1124.93	3237.98	2.87839	1.52526	4.44767e-15	6.55228e-14
THBS1	ENSG00000137801	630.501	54.3472	1206.65	22.2027	4.47266	4.3969e-176	9.70553e-174
NUSAP1	ENSG00000137804	470.62	631.556	309.683	0.490349	-1.02812	1.03011e-12	1.31015e-11
KIF23	ENSG00000137807	158.436	227.737	89.1348	0.391394	-1.35331	6.36768e-10	6.52877e-09
ITGA11	ENSG00000137809	262.337	413.661	111.014	0.268369	-1.89771	3.20587e-24	7.16532e-23
CASC5	ENSG00000137812	153.643	212.829	94.4572	0.443817	-1.17196	3.37793e-07	2.66927e-06
ITPKA	ENSG00000137825	83.1865	120.192	46.1812	0.384229	-1.37996	2.54492e-06	1.83115e-05
SMAD6	ENSG00000137834	202.236	286.2	118.273	0.413253	-1.2749	3.66846e-10	3.83938e-09
TMEM62	ENSG00000137842	630.067	217.961	1042.17	4.78147	2.25746	7.35154e-64	4.31543e-62
ADAM10	ENSG00000137845	2878.4	3851.35	1905.44	0.494746	-1.01524	2.01928e-26	4.8632e-25
CYP19A1	ENSG00000137869	3261.47	1432.65	5090.28	3.55304	1.82906	2.22046e-80	1.62483e-78
SEMA6D	ENSG00000137872	33.3242	6.10612	60.5422	9.915	3.30961	1.40538e-11	1.63914e-10
GCHFR	ENSG00000137880	142.331	214.264	70.3981	0.328557	-1.60578	6.57553e-12	7.90752e-11
BCAR3	ENSG00000137936	285.929	124.348	447.51	3.59886	1.84754	3.10009e-27	7.64546e-26
GTF2B	ENSG00000137947	1839.73	696.993	2982.46	4.27904	2.09729	3.75974e-89	3.1186e-87
IFI44L	ENSG00000137959	2132.68	125.757	4139.6	32.9175	5.04078	2.09897e-55	1.03626e-53
IFI44	ENSG00000137965	2037.45	237.04	3837.87	16.1908	4.0171	2.34256e-123	3.1128e-121
PNPT1	ENSG00000138035	2476.07	561.596	4390.54	7.81797	2.96679	1.05808e-175	2.29758e-173
EMILIN1	ENSG00000138080	63.4368	86.9045	39.9692	0.459922	-1.12054	0.000659509	0.00335456
MYOF	ENSG00000138119	2868.67	895.067	4842.28	5.40996	2.43562	6.67269e-46	2.70441e-44
LOXL4	ENSG00000138131	28.0165	43.1357	12.8973	0.298993	-1.74182	0.000437733	0.00229333
STAMBPL1	ENSG00000138134	26.9224	15.5256	38.3193	2.46814	1.30342	0.0097557	0.0386194
KIF11	ENSG00000138160	186.734	261.163	112.304	0.430016	-1.21754	4.09215e-09	3.9259e-08
DUSP5	ENSG00000138166	3809	443.125	7174.88	16.1915	4.01717	8.66597e-123	1.14019e-120
CALHM2	ENSG00000138172	525.97	748.052	303.888	0.406239	-1.2996	2.91663e-20	5.64903e-19
ENTPD1	ENSG00000138185	522.348	240.46	804.236	3.34457	1.74182	7.91791e-36	2.52664e-34
RBP4	ENSG00000138207	8.37277	15.3826	1.36291	0.0886007	-3.49654	0.00252914	0.0114765
ZNF365	ENSG00000138311	22.7789	7.89812	37.6597	4.76819	2.25344	2.72494e-05	0.000171531
DNA2	ENSG00000138346	79.9543	111.819	48.0897	0.430068	-1.21736	7.65232e-05	0.000451083
STAT4	ENSG00000138378	87.5637	0.602428	174.525	289.703	8.17843	1.77277e-54	8.63703e-53
SSB	ENSG00000138385	950.08	578.653	1321.51	2.28376	1.19141	4.55052e-05	0.000276667
HECW2	ENSG00000138411	31.1616	13.1006	49.2226	3.75728	1.90969	2.94149e-05	0.000184164
CIR1	ENSG00000138433	551.097	333.828	768.367	2.30169	1.20269	5.77124e-06	3.9585e-05
CHRNA1	ENSG00000138435	4.08874	0	8.17747	#DIV/0!	#DIV/0!	0.00237887	0.0108574
FAM117B	ENSG00000138439	27.272	46.8114	7.73267	0.165188	-2.59782	6.29744e-06	4.30065e-05
WDR12	ENSG00000138442	446.373	610.736	282.009	0.461752	-1.11481	3.59901e-14	5.05395e-13
ITGAV	ENSG00000138448	960.364	338.816	1581.91	4.66894	2.2231	6.19654e-47	2.58196e-45
PARP9	ENSG00000138496	4208.79	975.513	7442.08	7.62889	2.93147	9.82863e-193	2.70632e-190
SPPL2A	ENSG00000138600	838.057	497.192	1178.92	2.37116	1.24559	7.18999e-26	1.69495e-24
HERC6	ENSG00000138642	2303.09	444.315	4161.87	9.36693	3.22758	2.1826e-169	4.38309e-167
HERC5	ENSG00000138646	1442.88	54.8219	2830.95	51.6389	5.69039	0	0
PCDH10	ENSG00000138650	6.43439	0	12.8688	#DIV/0!	#DIV/0!	5.46665e-05	0.000328552
RASGEF1B	ENSG00000138670	1553.63	148.471	2958.78	19.9283	4.31675	8.90775e-270	4.32576e-267
AGPAT9	ENSG00000138678	380.892	140.409	621.376	4.42546	2.14583	2.68548e-42	1.01309e-40
FGF2	ENSG00000138685	53.3724	10.609	96.1357	9.06167	3.17978	7.65816e-16	1.18575e-14
CXCL9	ENSG00000138755	593.527	1.49079	1185.56	795.26	9.63528	3.68763e-278	1.85836e-275
SCARB2	ENSG00000138760	4462.2	2498.77	6425.63	2.57151	1.36262	1.67724e-49	7.51635e-48
CNOT6L	ENSG00000138767	556.124	327.436	784.811	2.39683	1.26113	1.53417e-21	3.10426e-20
ANXA3	ENSG00000138772	43.7046	23.7249	63.6843	2.68428	1.42453	0.000151673	0.000854648
INTS12	ENSG00000138785	216.436	137.004	295.868	2.15955	1.11073	1.54203e-09	1.53279e-08
EGF	ENSG00000138798	25.5334	11.2268	39.84	3.54866	1.82728	0.000826848	0.00413254
SLC39A8	ENSG00000138821	570.684	369.255	772.113	2.091	1.0642	6.84176e-16	1.06366e-14
MAPK8IP3	ENSG00000138834	1258.85	1803.44	714.253	0.39605	-1.33625	2.30256e-26	5.52553e-25
PARVG	ENSG00000138964	4654.44	6678.77	2630.11	0.393802	-1.34446	3.9706e-48	1.7105e-46
GABARAPL1	ENSG00000139112	338.43	132.812	544.047	4.09636	2.03434	4.96219e-35	1.55375e-33
NDUFA9	ENSG00000139180	67.9819	37.1879	98.776	2.65613	1.40933	4.91167e-06	3.39596e-05
VAMP1	ENSG00000139190	46.4195	72.5532	20.2859	0.279601	-1.83856	4.97641e-06	3.43805e-05
AMIGO2	ENSG00000139211	56.8145	16.9193	96.7097	5.71596	2.51499	1.01658e-11	1.19982e-10
43533	ENSG00000139266	681.717	421.57	941.863	2.23418	1.15975	1.97705e-15	2.98165e-14
DUSP6	ENSG00000139318	8553.06	5264.49	11841.6	2.24934	1.1695	4.7262e-40	1.69212e-38
TMTC3	ENSG00000139324	82.5706	46.0508	119.09	2.58607	1.37076	2.46851e-06	1.77905e-05
GAS2L3	ENSG00000139354	115.661	184.408	46.9131	0.254398	-1.97484	1.58639e-13	2.12492e-12
SLC15A4	ENSG00000139370	333.572	168.847	498.297	2.95119	1.56129	9.59424e-23	2.02251e-21
RITA1	ENSG00000139405	352.694	501.781	203.606	0.405767	-1.30128	1.6548e-15	2.51126e-14
MMAB	ENSG00000139428	264.674	354.75	174.597	0.49217	-1.02277	8.21987e-09	7.68175e-08
SLC7A1	ENSG00000139514	2664.02	3808.75	1519.28	0.398892	-1.32593	2.01696e-41	7.51339e-40
ACVRL1	ENSG00000139567	226.229	138.541	313.916	2.26588	1.18007	2.40452e-09	2.35678e-08
GPR84	ENSG00000139572	826.271	493.143	1159.4	2.35104	1.2333	1.82079e-25	4.22149e-24
N4BP2L1	ENSG00000139597	267.625	115.674	419.577	3.62725	1.85888	3.79694e-26	9.0305e-25
CELA1	ENSG00000139610	8.01901	1.49079	14.5472	9.75808	3.2866	0.00190763	0.00888575
BRCA2	ENSG00000139618	151.719	70.0922	233.345	3.32912	1.73514	3.3666e-11	3.80366e-10
ITGB7	ENSG00000139626	10929.8	6762.75	15096.8	2.23235	1.15856	2.75505e-35	8.67743e-34
GALNT6	ENSG00000139629	717.1	333.322	1100.88	3.30274	1.72366	3.47289e-41	1.28651e-39
ESYT1	ENSG00000139641	5969.3	8383.89	3554.7	0.423992	-1.23789	2.08465e-42	7.93145e-41
LPAR6	ENSG00000139679	185.26	115.066	255.454	2.22007	1.1506	1.18412e-08	1.08982e-07
SLAIN1	ENSG00000139737	48.5728	72.9002	24.2454	0.332583	-1.58821	2.35045e-05	0.000149259
RAB20	ENSG00000139832	303.183	44.5141	561.852	12.6219	3.65786	5.81632e-83	4.4133e-81
CBLN3	ENSG00000139899	65.9069	21.9482	109.866	5.00567	2.32356	2.13445e-12	2.64175e-11
TSSK4	ENSG00000139908	15.8311	24.0873	7.5749	0.314477	-1.66897	0.0116737	0.0452201
TMX1	ENSG00000139921	843.901	560.183	1127.62	2.01295	1.00931	1.30724e-17	2.23385e-16
PELI2	ENSG00000139946	42.343	64.5579	20.1281	0.311784	-1.68138	4.72325e-05	0.000286387
RTN1	ENSG00000139970	448.038	239.939	656.137	2.73459	1.45133	1.06611e-23	2.33208e-22
GPR65	ENSG00000140030	65.5107	25.9764	105.045	4.04386	2.01573	7.05097e-10	7.19894e-09
WARS	ENSG00000140105	24634.1	6869.47	42398.7	6.17204	2.62575	1.13962e-189	3.0438e-187
HERC2P2	ENSG00000140181	445.123	602.142	288.105	0.478466	-1.06351	4.66267e-05	0.000282906
LYSMD2	ENSG00000140280	640.984	228.32	1053.65	4.61479	2.20627	7.96106e-62	4.50491e-60
BCL2A1	ENSG00000140379	1244.6	220.753	2268.45	10.2759	3.3612	2.80661e-152	5.03099e-150
NCOA2	ENSG00000140396	853.648	522.55	1184.75	2.26724	1.18094	8.16398e-23	1.72237e-21
NEIL1	ENSG00000140398	53.6036	82.861	24.3461	0.293819	-1.767	3.46412e-06	2.45485e-05
MESDC1	ENSG00000140406	1758.12	1074.32	2441.91	2.27297	1.18458	7.32799e-17	1.21266e-15
ARRDC4	ENSG00000140450	327.746	153.78	501.711	3.26252	1.70599	6.5156e-26	1.53868e-24
PML	ENSG00000140464	7002.59	1930.28	12074.9	6.25551	2.64513	5.58506e-38	1.8811e-36
ADAMTS17	ENSG00000140470	42.9398	16.7152	69.1645	4.13783	2.04887	2.76202e-07	2.20212e-06
HAPLN3	ENSG00000140511	744.43	38.4746	1450.39	37.6973	5.23639	2.52482e-231	1.02175e-228
TICRR	ENSG00000140534	118.929	188.793	49.0648	0.259887	-1.94405	4.20582e-14	5.85985e-13
NTRK3	ENSG00000140538	51.7583	12.4163	91.1003	7.33714	2.87522	2.08593e-13	2.77594e-12
MFGE8	ENSG00000140545	271.567	393.914	149.219	0.378811	-1.40045	3.0299e-09	2.94811e-08
ZNF710	ENSG00000140548	916.327	589.43	1243.22	2.1092	1.07669	7.59974e-20	1.45507e-18
FURIN	ENSG00000140564	11856.7	7012.72	16700.7	2.38148	1.25186	4.87074e-22	9.99175e-21
NKD1	ENSG00000140807	256.419	151.866	360.972	2.37691	1.24909	3.82362e-13	4.99431e-12
TXNL4B	ENSG00000140830	377.595	243.478	511.712	2.10168	1.07154	5.53961e-13	7.1824e-12
CHST4	ENSG00000140835	37.8439	67.9837	7.70416	0.113324	-3.14148	5.31912e-10	5.49588e-09
CPNE2	ENSG00000140848	4758.13	6873.57	2642.68	0.38447	-1.37906	1.44827e-42	5.52597e-41
NLRC5	ENSG00000140853	3262.81	1379.64	5145.99	3.72996	1.89916	9.15774e-86	7.21516e-84
NUDT7	ENSG00000140876	49.8239	79.7059	19.9419	0.250193	-1.99889	9.24214e-07	6.95935e-06
OSGIN1	ENSG00000140961	235.645	85.3831	385.908	4.51972	2.17623	1.48836e-15	2.26639e-14
IRF8	ENSG00000140968	2102.95	3116.59	1089.31	0.349522	-1.51655	2.21783e-50	1.00741e-48
TOB1	ENSG00000141232	862.919	513.33	1212.51	2.36205	1.24004	6.17694e-26	1.46129e-24
SSH2	ENSG00000141298	213.02	287.553	138.487	0.481604	-1.05408	6.96665e-08	5.92776e-07
IMPA2	ENSG00000141401	52.8417	89.013	16.6705	0.187281	-2.41672	5.45893e-10	5.63161e-09
GAREM	ENSG00000141441	344.379	133.578	555.18	4.15622	2.05527	3.95464e-37	1.3024e-35
GATA6	ENSG00000141448	20.7563	9.11826	32.3943	3.55269	1.82891	0.00172808	0.00810882
ZMYND15	ENSG00000141497	104.653	12.0846	197.221	16.3201	4.02858	2.114e-39	7.42931e-38
PIK3R5	ENSG00000141506	4210.87	1447.44	6974.29	4.81835	2.26854	6.2704e-125	8.58852e-123
SLC16A3	ENSG00000141526	10469.5	6513.43	14425.6	2.21475	1.14714	1.28753e-38	4.40881e-37
TTYH2	ENSG00000141540	434.408	51.2227	817.593	15.9616	3.99653	8.0284e-121	1.04093e-118
TRIM65	ENSG00000141569	269.457	370.5	168.414	0.454558	-1.13746	1.32773e-10	1.43689e-09
CBX8	ENSG00000141570	204.153	307.035	101.272	0.329838	-1.60017	1.44612e-15	2.20334e-14
SECTM1	ENSG00000141574	1254.01	173.875	2334.15	13.4242	3.74677	9.93865e-202	3.05117e-199
AZI1	ENSG00000141577	172.464	241.144	103.783	0.430376	-1.21633	1.45924e-08	1.3302e-07
RNF165	ENSG00000141622	14.8263	23.3113	6.34125	0.272025	-1.87819	0.0124409	0.047845
TNFRSF11A	ENSG00000141655	174.146	73.5845	274.708	3.73323	1.90042	1.42669e-11	1.66255e-10
ZCCHC2	ENSG00000141664	3470.06	749.394	6190.72	8.26097	3.04631	2.47515e-199	7.34541e-197
PMAIP1	ENSG00000141682	2431.7	1361.48	3501.92	2.57215	1.36297	4.74488e-43	1.8261e-41
LEPREL4	ENSG00000141696	69.0134	101.572	36.4546	0.358903	-1.47833	6.39422e-06	4.36005e-05
IGFBP4	ENSG00000141753	5716.75	2005.4	9428.09	4.70135	2.23308	9.91367e-29	2.56574e-27
CACNA1A	ENSG00000141837	290.748	89.4266	492.07	5.5025	2.46009	3.27572e-44	1.29234e-42
SAMD1	ENSG00000141858	281.884	382.901	180.866	0.472357	-1.08205	3.25027e-10	3.41374e-09
SLC39A3	ENSG00000141873	1229.28	1815.38	643.184	0.354297	-1.49697	1.6532e-20	3.2372e-19
ZFP14	ENSG00000142065	39.0294	58.3754	19.6833	0.337186	-1.56839	0.000257026	0.00139729
IFITM3	ENSG00000142089	16754.4	4798	28710.8	5.9839	2.58109	2.51054e-65	1.50683e-63
COL6A1	ENSG00000142156	1933.82	741.929	3125.72	4.21296	2.07483	1.49365e-53	7.1881e-52
COL6A2	ENSG00000142173	1151.46	464.583	1838.33	3.95696	1.98439	2.28728e-67	1.40117e-65
SIK1	ENSG00000142178	478.397	116.878	839.915	7.18622	2.84523	1.13178e-78	8.16995e-77
ADAMTS10	ENSG00000142303	26.9406	41.1702	12.711	0.308743	-1.69552	0.00154131	0.00729393
ERVK3-1	ENSG00000142396	331.272	173.329	489.215	2.82247	1.49696	4.30701e-20	8.29984e-19
NLRP12	ENSG00000142405	58.9369	117.874	0	0	#NUM!	2.06654e-30	5.64368e-29
SLC2A5	ENSG00000142583	381.479	225.941	537.018	2.37681	1.24903	8.93705e-17	1.47255e-15
RERE	ENSG00000142599	1288.81	511.461	2066.15	4.03971	2.01425	4.01482e-72	2.65425e-70
FHAD1	ENSG00000142621	9.43963	1.95025	16.929	8.68043	3.11777	0.00102265	0.00502045
PADI1	ENSG00000142623	3.5508	0	7.10159	#DIV/0!	#DIV/0!	0.00441515	0.0190385
SYTL1	ENSG00000142765	427.717	746.386	109.048	0.146102	-2.77496	1.53276e-62	8.7851e-61
PRKACB	ENSG00000142875	272.882	407.148	138.616	0.340456	-1.55446	2.71534e-10	2.87338e-09
ADC	ENSG00000142920	55.8753	9.67484	102.076	10.5506	3.39926	1.37943e-09	1.37578e-08
KIF2C	ENSG00000142945	825.534	1153.96	497.105	0.430781	-1.21497	2.4386e-23	5.23153e-22
PTPRF	ENSG00000142949	6844.28	9575.49	4113.07	0.429541	-1.21913	1.40529e-42	5.36966e-41
MOB3C	ENSG00000142961	1102.43	535.385	1669.48	3.11827	1.64075	5.10582e-24	1.12984e-22
ZNF697	ENSG00000143067	1092.1	637.427	1546.77	2.42658	1.27893	8.25778e-30	2.22112e-28
C1orf162	ENSG00000143110	247.192	132.608	361.776	2.72816	1.44793	3.44908e-16	5.48669e-15
CELSR2	ENSG00000143126	227.452	349.471	105.433	0.301692	-1.72885	1.16324e-18	2.10922e-17
GPR161	ENSG00000143147	36.7288	15.3826	58.0749	3.77536	1.91661	5.97725e-06	4.0935e-05
TBX19	ENSG00000143178	79.8862	45.8467	113.926	2.48493	1.31321	4.61506e-06	3.20582e-05
UCK2	ENSG00000143179	632.73	929.191	336.269	0.361894	-1.46636	1.49801e-27	3.72188e-26
PPOX	ENSG00000143224	195.146	284.229	106.064	0.373164	-1.42212	3.12033e-12	3.82738e-11
NUF2	ENSG00000143228	102.598	149.977	55.2198	0.368188	-1.44148	1.61053e-07	1.32031e-06
PIGM	ENSG00000143315	249.048	355.807	142.288	0.399903	-1.32228	6.81228e-13	8.78133e-12
ABL2	ENSG00000143322	1576.52	644.151	2508.9	3.89489	1.96158	8.42498e-64	4.91316e-62
RGS16	ENSG00000143333	11819.4	1034.24	22604.6	21.8563	4.44998	0	0
HMCN1	ENSG00000143341	85.9136	20.1562	151.671	7.52478	2.91165	1.77397e-21	3.58133e-20
RGL1	ENSG00000143344	409.304	24.0414	794.566	33.0499	5.04657	2.12912e-150	3.79111e-148
SNX27	ENSG00000143376	522.607	276.183	769.03	2.78449	1.47741	8.61659e-28	2.16094e-26
MCL1	ENSG00000143384	11222.5	6038.28	16406.7	2.71712	1.44208	3.28152e-60	1.77781e-58
CTSK	ENSG00000143387	77.3813	31.6842	123.078	3.88454	1.95774	1.83743e-10	1.97171e-09
IKBKE	ENSG00000143466	1526.7	825.434	2227.97	2.69915	1.4325	1.18336e-41	4.43289e-40
DYRK3	ENSG00000143479	89.8524	39.2811	140.424	3.57484	1.83788	4.70499e-11	5.2712e-10
DUSP10	ENSG00000143507	1432.12	747.807	2116.42	2.83017	1.50089	3.13221e-45	1.25425e-43
RIT1	ENSG00000143622	873.492	467.891	1279.09	2.73374	1.45087	1.21135e-34	3.75337e-33
MLK4	ENSG00000143674	53.7348	81.5743	25.8953	0.317445	-1.65542	5.30324e-06	3.64875e-05
PSEN2	ENSG00000143801	1506	2012.47	999.522	0.496663	-1.00966	6.05188e-21	1.19645e-19
WNT9A	ENSG00000143816	90.8715	135.146	46.5975	0.344795	-1.53619	1.04061e-07	8.70187e-07
PPFIA4	ENSG00000143847	110.843	181.932	39.7545	0.218513	-2.19421	5.22865e-15	7.67741e-14
RHOB	ENSG00000143878	702.637	368.622	1036.65	2.81223	1.49172	4.05112e-14	5.65316e-13
ATP6V1C2	ENSG00000143882	165.627	223.827	107.427	0.479955	-1.05903	9.84549e-07	7.38868e-06
HNRNPLL	ENSG00000143889	858.174	413.657	1302.69	3.14921	1.65499	2.28163e-43	8.83188e-42
GALM	ENSG00000143891	756.427	132.925	1379.93	10.3813	3.37591	4.00929e-133	5.94912e-131
CAMKMT	ENSG00000143919	34.8082	47.021	22.5954	0.48054	-1.05727	0.0119399	0.0461243
CALM2	ENSG00000143933	2996.53	4060.35	1932.72	0.475997	-1.07098	8.13409e-29	2.10926e-27
TMEM177	ENSG00000144120	99.1779	133.624	64.7317	0.484431	-1.04564	0.000154987	0.000872401
SLC20A1	ENSG00000144136	5571.44	7570.93	3571.95	0.471798	-1.08376	1.13228e-32	3.31601e-31
AFF3	ENSG00000144218	146.635	227.937	65.3342	0.286633	-1.80272	5.00411e-14	6.91795e-13
CDCA7	ENSG00000144354	67.5726	111.502	23.6428	0.212038	-2.2376	5.85398e-11	6.4958e-10
DLX1	ENSG00000144355	85.3759	125.072	45.6794	0.365224	-1.45315	7.96576e-07	6.04768e-06
ACKR3	ENSG00000144476	136.48	15.8268	257.132	16.2466	4.02207	2.95513e-49	1.31329e-47
HES6	ENSG00000144485	264.185	371.49	156.879	0.422298	-1.24367	4.691e-09	4.47791e-08
ESPNL	ENSG00000144488	7.63877	2.09322	13.1843	6.29859	2.65503	0.0126854	0.0486873
RAB5A	ENSG00000144566	773.662	464.221	1083.1	2.33316	1.22229	4.41866e-24	9.79403e-23
GRIP2	ENSG00000144596	39.9176	3.72697	76.1083	20.421	4.35198	2.38158e-18	4.25198e-17
CSRNP1	ENSG00000144655	4023.41	823.928	7222.9	8.76642	3.13199	7.3302e-95	6.63669e-93
CTDSPL	ENSG00000144677	123.015	178.414	67.6153	0.378979	-1.39981	2.33653e-06	1.6894e-05
IL17RD	ENSG00000144730	26.5175	6.27965	46.7553	7.44553	2.89637	9.11657e-08	7.68364e-07
NFKBIZ	ENSG00000144802	998.336	132.231	1864.44	14.0999	3.81762	4.1605e-186	1.06849e-183
ABHD10	ENSG00000144827	144.223	201.276	87.1693	0.433083	-1.20728	1.43981e-07	1.18911e-06
PLA1A	ENSG00000144837	7.03696	0	14.0739	#DIV/0!	#DIV/0!	1.91384e-05	0.000123114
ADPRH	ENSG00000144843	1037.15	470.781	1603.51	3.40606	1.7681	1.85795e-53	8.92518e-52
NCEH1	ENSG00000144959	471.982	240.685	703.28	2.92199	1.54695	1.37352e-27	3.41896e-26
KIAA0226	ENSG00000145016	2531.61	427.207	4636.01	10.8519	3.43988	9.97565e-229	3.97671e-226
UCN2	ENSG00000145040	134.134	89.0795	179.188	2.01155	1.00831	6.06174e-06	4.14817e-05
SLIT2	ENSG00000145147	13.2193	3.13982	23.2988	7.4204	2.8915	0.000188058	0.00104447
SLC10A4	ENSG00000145248	409.593	608.134	211.052	0.347048	-1.52679	7.54251e-07	5.75087e-06
PLAC8	ENSG00000145287	307.761	436.621	178.901	0.409739	-1.28722	2.98883e-14	4.22151e-13
CCNA2	ENSG00000145386	328.181	462.684	193.678	0.418597	-1.25637	2.63997e-14	3.74263e-13
43525	ENSG00000145416	59.5029	14.1472	104.859	7.41197	2.88986	2.85549e-16	4.56691e-15
SFRP2	ENSG00000145423	24.2237	0.745394	47.7019	63.9956	5.9999	1.30374e-14	1.87818e-13
ROPN1L	ENSG00000145491	159.247	234.783	83.7117	0.356549	-1.48783	1.55276e-11	1.8016e-10
MYO10	ENSG00000145555	2541.02	1160.74	3921.29	3.37826	1.75628	2.87906e-69	1.83525e-67
FAM105A	ENSG00000145569	731.663	1003.79	459.533	0.457797	-1.12722	6.78995e-19	1.24555e-17
SKP2	ENSG00000145604	182.814	245.805	119.822	0.487468	-1.03662	5.88572e-07	4.55789e-06
OSMR	ENSG00000145623	1411.39	698.503	2124.27	3.04118	1.60463	3.74254e-50	1.69423e-48
PLK2	ENSG00000145632	137.13	22.5506	251.709	11.162	3.48052	5.53721e-41	2.0371e-39
LHFPL2	ENSG00000145685	200.84	50.9367	350.744	6.88587	2.78364	9.28525e-41	3.39726e-39
SSBP2	ENSG00000145687	204.295	130.153	278.437	2.13931	1.09715	5.1691e-09	4.91672e-08
IQGAP2	ENSG00000145703	115.455	53.7601	177.15	3.2952	1.72036	8.48895e-12	1.00949e-10
PAM	ENSG00000145730	824.004	353.913	1294.1	3.65654	1.87048	9.53846e-52	4.43066e-50
TSLP	ENSG00000145777	31.6928	13.7183	49.6674	3.62052	1.8562	5.3839e-05	0.000323944
TNFAIP8	ENSG00000145779	903.052	311.4	1494.7	4.79995	2.26302	5.70925e-77	4.03408e-75
FEM1C	ENSG00000145780	544.013	247.536	840.489	3.39542	1.76359	1.0553e-37	3.53207e-36
MEGF10	ENSG00000145794	27.2872	41.5478	13.0265	0.313531	-1.67332	0.00094849	0.00468526
TNIP1	ENSG00000145901	8101.28	3004.46	13198.1	4.39284	2.13515	4.07258e-122	5.30607e-120
N4BP3	ENSG00000145911	104.978	67.366	142.591	2.11666	1.08179	0.00832297	0.033514
PLA2G7	ENSG00000146070	40.8196	8.96001	72.6791	8.1115	3.01997	9.3214e-12	1.10455e-10
RNF44	ENSG00000146083	919.689	1244.36	595.022	0.478177	-1.06438	9.16249e-14	1.24413e-12
FGD2	ENSG00000146192	602.797	87.8998	1117.69	12.7156	3.66852	3.11382e-67	1.90313e-65
NFKBIE	ENSG00000146232	2406.87	1137.71	3676.04	3.23108	1.69201	7.89697e-41	2.89328e-39
IRAK1BP1	ENSG00000146243	82.3869	141.002	23.7721	0.168594	-2.56837	3.08682e-15	4.60334e-14
MMS22L	ENSG00000146263	118.324	169.765	66.8834	0.393976	-1.34382	1.08601e-07	9.07014e-07
PNRC1	ENSG00000146278	2283.89	1095.54	3472.24	3.16943	1.66422	8.51019e-38	2.8591e-36
RSPO3	ENSG00000146374	117.846	9.27651	226.416	24.4075	4.60925	1.08685e-49	4.88697e-48
MTFR2	ENSG00000146410	89.162	123.52	54.8035	0.44368	-1.17241	2.77383e-05	0.000174361
SLC2A12	ENSG00000146411	4.00269	0.301214	7.70416	25.577	4.67678	0.00965721	0.0382522
DYNLT1	ENSG00000146425	2896.74	776.565	5016.91	6.46038	2.69162	6.78619e-156	1.24145e-153
WTAP	ENSG00000146457	2168.93	990.319	3347.54	3.38026	1.75714	8.56794e-68	5.29725e-66
SDK1	ENSG00000146555	260.081	155.603	364.559	2.34288	1.22828	1.55283e-12	1.94807e-11
CREB5	ENSG00000146592	9.91262	2.39443	17.4308	7.27974	2.86389	0.00435944	0.0188134
IGFBP3	ENSG00000146674	10840.6	1230.42	20450.7	16.621	4.05493	0	0
POMZP3	ENSG00000146707	53.8804	35.8706	71.8903	2.00416	1.00299	0.00480294	0.0204988
PSPH	ENSG00000146733	257.819	376.132	139.506	0.370896	-1.43092	5.40359e-15	7.91687e-14
STRA8	ENSG00000146857	53.3237	89.0588	17.5886	0.197494	-2.34012	7.77612e-10	7.91812e-09
ZC3HAV1L	ENSG00000146858	64.4071	101.24	27.5738	0.272359	-1.87642	3.0767e-08	2.71386e-07
TMEM140	ENSG00000146859	418.88	234.318	603.441	2.57531	1.36475	1.65972e-19	3.15065e-18
TLK2	ENSG00000146872	1137.27	676.437	1598.09	2.36252	1.24033	4.06838e-13	5.30578e-12
EPHA1	ENSG00000146904	35.4088	52.8411	17.9764	0.340197	-1.55556	0.00106258	0.00519505
SHROOM2	ENSG00000146950	78.2475	113.197	43.2976	0.382497	-1.38648	4.44669e-06	3.09934e-05
KDM6A	ENSG00000147050	12.101	0.745394	23.4565	31.4686	4.97584	4.73993e-07	3.69848e-06
CHST7	ENSG00000147119	772.978	192.535	1353.42	7.02946	2.81341	3.34803e-102	3.38722e-100
EBP	ENSG00000147155	965.569	1468.32	462.818	0.315202	-1.66565	1.46343e-43	5.6812e-42
IGSF1	ENSG00000147255	417.143	244.616	589.669	2.41059	1.26939	8.21085e-18	1.42497e-16
GPC3	ENSG00000147257	627.86	850.043	405.676	0.477242	-1.06721	1.36269e-15	2.07858e-14
ATP6V1B2	ENSG00000147416	8518.23	4431.93	12604.5	2.84403	1.50794	3.83137e-65	2.29444e-63
STAR	ENSG00000147465	157.97	254.48	61.4603	0.241514	-2.04982	6.14311e-19	1.13e-17
RGS20	ENSG00000147509	212.599	128.212	296.985	2.31636	1.21186	8.58093e-05	0.000502495
DPYS	ENSG00000147647	10.7304	2.69564	18.7652	6.96131	2.79936	0.00139064	0.00664685
LRP12	ENSG00000147650	1166.07	372.517	1959.63	5.26052	2.3952	2.96424e-95	2.69292e-93
ARHGAP39	ENSG00000147799	26.6465	38.9035	14.3895	0.369876	-1.43489	0.0070656	0.0290197
VLDLR	ENSG00000147852	807.939	1177.3	438.573	0.372522	-1.4246	2.74287e-30	7.46021e-29
UHRF2	ENSG00000147854	813.265	1222.13	404.399	0.330897	-1.59555	2.09971e-37	6.98396e-36
C9orf72	ENSG00000147894	70.2611	39.2505	101.272	2.58014	1.36745	8.47901e-06	5.69582e-05
ZNF462	ENSG00000148143	384.802	107.198	662.406	6.17926	2.62743	3.3407e-58	1.73593e-56
UGCG	ENSG00000148154	980.636	628.881	1332.39	2.11867	1.08316	5.73341e-13	7.41449e-12
SNX30	ENSG00000148158	182.43	280.13	84.7305	0.302469	-1.72514	1.26473e-15	1.93468e-14
NACC2	ENSG00000148411	1443.39	2186.01	700.769	0.32057	-1.64129	3.47848e-51	1.60184e-49
PROSER2	ENSG00000148426	59.4236	79.9253	38.9219	0.486978	-1.03807	0.00168701	0.00792445
USP6NL	ENSG00000148429	275.314	163.302	387.325	2.37183	1.246	1.80144e-07	1.46915e-06
CAMK2G	ENSG00000148660	335.026	480.506	189.545	0.39447	-1.34201	1.02851e-16	1.68842e-15
ANKRD1	ENSG00000148677	54.9974	0	109.995	#DIV/0!	#DIV/0!	9.3923e-38	3.15149e-36
ADD3	ENSG00000148700	89.5786	132.373	46.7838	0.353423	-1.50053	1.92314e-07	1.5622e-06
TCF7L2	ENSG00000148737	355.882	163.598	548.166	3.35069	1.74446	1.46194e-24	3.30906e-23
MKI67	ENSG00000148773	1375.64	1847.45	903.823	0.489228	-1.03142	2.92333e-05	0.00018307
ADAM12	ENSG00000148848	66.2837	32.1131	100.454	3.12815	1.64531	2.15019e-07	1.73607e-06
ADM	ENSG00000148926	188.216	28.8456	347.586	12.0499	3.59095	9.29885e-55	4.54877e-53
SERPING1	ENSG00000149131	371.977	19.2831	724.67	37.5805	5.23191	3.06138e-144	5.24143e-142
SLC43A1	ENSG00000149150	1142.58	1632.32	652.839	0.399946	-1.32212	3.13485e-14	4.4184e-13
PTPRJ	ENSG00000149177	2970.35	1578.38	4362.33	2.76381	1.46666	1.84366e-51	8.51944e-50
ENDOD1	ENSG00000149218	890.55	176.459	1604.64	9.09358	3.18485	1.62141e-134	2.43293e-132
CAPN5	ENSG00000149260	24.2677	35.0641	13.4713	0.384192	-1.3801	0.0123335	0.0474936
ZC3H12C	ENSG00000149289	1907.21	631.055	3183.37	5.04452	2.33472	6.36636e-108	6.99749e-106
FADS1	ENSG00000149485	920.182	1331.57	508.798	0.382105	-1.38796	3.22023e-31	8.94995e-30
MS4A3	ENSG00000149516	108.101	166.406	49.7967	0.299248	-1.74059	1.1149e-10	1.21444e-09
FEZ1	ENSG00000149557	358.691	147.337	570.045	3.86899	1.95196	3.7619e-16	5.97009e-15
SIDT2	ENSG00000149577	764.466	353.709	1175.22	3.32258	1.7323	2.22836e-34	6.84895e-33
OCSTAMP	ENSG00000149635	1355.5	1995.17	715.833	0.358782	-1.47882	5.94185e-41	2.18296e-39
CDC42EP2	ENSG00000149798	210.977	85.8426	336.111	3.91543	1.96917	9.39305e-11	1.02819e-09
TM7SF2	ENSG00000149809	172.024	282.172	61.8766	0.219287	-2.18911	6.19156e-22	1.26399e-20
FAM57B	ENSG00000149926	31.8249	49.0018	14.648	0.298928	-1.74213	0.000505409	0.00261811
TMEM219	ENSG00000149932	3636.69	2319.41	4953.98	2.13588	1.09483	4.2607e-32	1.22893e-30
MMP3	ENSG00000149968	183.152	7.31097	358.993	49.1034	5.61775	1.80709e-47	7.62491e-46
ARID5B	ENSG00000150347	492.155	146.704	837.605	5.70949	2.51336	1.25372e-64	7.4578e-63
N6AMT2	ENSG00000150456	84.9107	114.387	55.4346	0.484623	-1.04506	0.000197888	0.00109406
VEGFC	ENSG00000150630	303.98	61.99	545.971	8.80741	3.13872	6.97596e-67	4.23457e-65
CD226	ENSG00000150637	97.1129	15.2397	178.986	11.7448	3.55395	3.6004e-25	8.27566e-24
RGS18	ENSG00000150681	70.725	106.775	34.6754	0.324753	-1.62259	4.1537e-07	3.25723e-06
PRSS23	ENSG00000150687	69.9946	37.6986	102.291	2.71338	1.44009	1.13045e-06	8.43386e-06
DIXDC1	ENSG00000150764	310.376	144.391	476.362	3.2991	1.72207	1.64984e-25	3.83179e-24
CRIM1	ENSG00000150938	447.429	46.7503	848.108	18.1412	4.1812	6.84448e-130	9.82846e-128
ABCB9	ENSG00000150967	190.77	276.811	104.729	0.378343	-1.40223	9.05536e-12	1.07445e-10
UBC	ENSG00000150991	32550.5	17751	47350.1	2.66747	1.41547	7.91535e-61	4.37704e-59
SLC7A11	ENSG00000151012	1239.36	302.705	2176.02	7.18857	2.84571	5.76245e-130	8.31942e-128
CCRN4L	ENSG00000151014	385.626	194.68	576.573	2.96164	1.5664	1.07949e-15	1.65892e-14
GPR158	ENSG00000151025	51.8903	2.5374	101.243	39.9005	5.31833	1.78078e-27	4.41624e-26
BTBD11	ENSG00000151136	50.4016	29.831	70.9722	2.37914	1.25044	0.000351695	0.00187232
FAM177A1	ENSG00000151327	414.291	217.292	611.29	2.81322	1.49222	1.16128e-23	2.53403e-22
SCLT1	ENSG00000151466	190.576	92.6886	288.464	3.11218	1.63793	1.643e-09	1.62952e-08
C4orf33	ENSG00000151470	164.578	69.1121	260.044	3.76264	1.91175	5.31461e-19	9.82339e-18
PTPRO	ENSG00000151490	208.233	86.0368	330.429	3.84056	1.94132	1.51621e-18	2.73256e-17
ACAD8	ENSG00000151498	573.544	800.448	346.64	0.433057	-1.20737	2.61747e-19	4.92325e-18
THYN1	ENSG00000151500	326.281	464.593	187.968	0.404586	-1.30548	3.51797e-15	5.21718e-14
VPS26B	ENSG00000151502	1229.85	1709.74	749.949	0.438632	-1.18892	3.08858e-26	7.37861e-25
MMAA	ENSG00000151611	120.17	68.2543	172.086	2.52125	1.33414	3.50415e-08	3.06558e-07
POU4F2	ENSG00000151615	53.7153	13.1312	94.2994	7.18135	2.84425	5.20423e-14	7.17974e-13
VENTX	ENSG00000151650	103.327	150.416	56.2387	0.373888	-1.41932	2.30378e-07	1.85392e-06
ASAP2	ENSG00000151693	478.933	682.385	275.481	0.403703	-1.30863	7.55036e-20	1.44665e-18
ACSL1	ENSG00000151726	7977.06	1992.99	13961.1	7.00512	2.80841	6.84854e-197	2.01008e-194
SAV1	ENSG00000151748	573.895	346.096	801.694	2.31639	1.21188	2.16864e-13	2.88457e-12
TDO2	ENSG00000151790	2058.9	203.242	3914.57	19.2607	4.26758	2.69913e-291	1.53386e-288
CCL28	ENSG00000151882	159.705	213.662	105.748	0.494933	-1.01469	4.34814e-06	3.0354e-05
GLT1D1	ENSG00000151948	18.1166	8.21462	28.0186	3.41082	1.77012	0.00477907	0.0204133
GPATCH11	ENSG00000152133	336.804	462.571	211.037	0.456225	-1.13218	1.30782e-12	1.65391e-11
PSTPIP2	ENSG00000152229	234.908	69.0608	400.755	5.80293	2.53678	6.029e-39	2.08857e-37
GUCY1A2	ENSG00000152402	91.3136	26.4511	156.176	5.90432	2.56177	1.38362e-18	2.49865e-17
HOMER1	ENSG00000152413	353.628	177.311	529.945	2.98878	1.57956	2.96324e-23	6.32656e-22
ZNF837	ENSG00000152475	38.6011	54.0613	23.141	0.428051	-1.22414	0.0047857	0.0204318
USP12	ENSG00000152484	954.392	366.523	1542.26	4.20781	2.07307	3.1318e-67	1.90975e-65
CAMK4	ENSG00000152495	23.5381	9.07241	38.0038	4.18894	2.06658	7.54831e-05	0.000445247
TRIM36	ENSG00000152503	111.073	34.0633	188.082	5.52154	2.46507	3.61446e-14	5.07031e-13
TMEM123	ENSG00000152558	6193.77	3061.38	9326.16	3.04639	1.6071	3.80023e-69	2.40522e-67
SPARCL1	ENSG00000152583	12.6956	3.13982	22.2514	7.08683	2.82514	0.000382247	0.00202167
DMP1	ENSG00000152592	12.2366	2.5374	21.9359	8.64502	3.11187	0.000122787	0.000702705
GPD1L	ENSG00000152642	70.3712	101.404	39.3382	0.387934	-1.36612	0.000309192	0.00165894
GJA1	ENSG00000152661	15.2337	6.72383	23.7436	3.53126	1.82018	0.00613674	0.0256184
RASGRP3	ENSG00000152689	371.214	82.5903	659.838	7.98928	2.99807	2.53951e-71	1.65838e-69
GPR180	ENSG00000152749	229.033	64.9868	393.079	6.0486	2.5966	6.54957e-40	2.33243e-38
TCTEX1D1	ENSG00000152760	453.999	294.828	613.17	2.07975	1.05641	5.36871e-14	7.39901e-13
ANKRD22	ENSG00000152766	9.89111	1.33254	18.4497	13.8455	3.79135	4.25182e-05	0.000259689
IFIT5	ENSG00000152778	717.953	142.171	1293.74	9.09989	3.18585	5.42874e-113	6.44427e-111
PRDM8	ENSG00000152784	946.923	1269.09	624.761	0.492292	-1.02241	4.739e-18	8.32723e-17
HHEX	ENSG00000152804	308.484	490.978	125.99	0.256611	-1.96234	1.28556e-29	3.41992e-28
ZNF117	ENSG00000152926	290.078	401.586	178.57	0.444661	-1.16922	5.13414e-06	3.54152e-05
PLOD2	ENSG00000152952	38.6849	21.3611	56.0086	2.622	1.39067	0.000851577	0.00424818
NRSN1	ENSG00000152954	102.289	44.2129	160.366	3.62712	1.85882	1.40487e-12	1.77245e-11
SREK1IP1	ENSG00000153006	532.528	712.277	352.779	0.495284	-1.01367	6.4347e-14	8.83621e-13
LGI2	ENSG00000153012	30.0613	42.0891	18.0334	0.428457	-1.22278	0.00946219	0.0375521
CWC27	ENSG00000153015	203.921	276.142	131.701	0.476931	-1.06815	3.73464e-08	3.25763e-07
SMARCA5	ENSG00000153147	1146.24	593.433	1699.04	2.86307	1.51756	1.71306e-34	5.28337e-33
BMP6	ENSG00000153162	380.996	50.1913	711.801	14.1818	3.82596	2.16459e-103	2.21509e-101
NR4A2	ENSG00000153234	920.187	174.631	1665.74	9.53866	3.25379	9.0291e-140	1.43547e-137
ASAP1	ENSG00000153317	2559.82	1145.21	3974.44	3.47049	1.79514	5.64522e-73	3.80753e-71
UBALD1	ENSG00000153443	647.665	937.197	358.132	0.382131	-1.38786	2.63151e-25	6.07476e-24
GOLGA8I	ENSG00000153666	344.006	489.901	198.111	0.40439	-1.30618	7.93382e-16	1.22772e-14
PID1	ENSG00000153823	45.5103	11.2115	79.8092	7.11853	2.83158	1.39012e-11	1.62205e-10
CEBPG	ENSG00000153879	539.964	811.22	268.708	0.33124	-1.59405	8.34272e-31	2.29717e-29
KCTD15	ENSG00000153885	109.974	166.723	53.2258	0.319247	-1.64725	1.24201e-09	1.24383e-08
MCOLN2	ENSG00000153898	1395.44	497.799	2293.08	4.60644	2.20365	2.81269e-87	2.26277e-85
DDAH1	ENSG00000153904	31.5707	48.1494	14.992	0.311365	-1.68332	0.00118993	0.00577326
HS3ST3A1	ENSG00000153976	370.051	128.212	611.89	4.77248	2.25474	1.11922e-17	1.92364e-16
AK5	ENSG00000154027	67.1083	113.672	20.5444	0.180734	-2.46806	8.33068e-12	9.92644e-11
ANKRD29	ENSG00000154065	140.129	204.881	75.3764	0.367904	-1.4426	1.10823e-09	1.11739e-08
DNAAF1	ENSG00000154099	12.6886	2.23618	23.141	10.3484	3.37134	2.79346e-05	0.000175513
C16orf74	ENSG00000154102	44.4801	77.4544	11.5059	0.14855	-2.75098	6.7764e-10	6.93186e-09
UBASH3B	ENSG00000154127	2316.85	3337.25	1296.45	0.388478	-1.36409	2.41719e-42	9.15816e-41
ABCA6	ENSG00000154262	6.13303	0.602428	11.6636	19.361	4.27508	0.00229492	0.0105029
ENPP3	ENSG00000154269	8.83751	0.301214	17.3738	57.6793	5.84998	0.000915503	0.00453237
MIA3	ENSG00000154305	694.742	407.683	981.802	2.40825	1.26799	2.06238e-23	4.44943e-22
DISP1	ENSG00000154309	90.7503	54.2042	127.296	2.34846	1.23171	6.74754e-06	4.58458e-05
OBSCN	ENSG00000154358	133.887	183.402	84.3713	0.460035	-1.12019	9.08683e-07	6.84433e-06
CCSAP	ENSG00000154429	471.911	638.3	305.522	0.47865	-1.06296	5.6821e-14	7.81478e-13
GBP5	ENSG00000154451	1039.43	19.222	2059.64	107.15	6.74349	0	0
BTG3	ENSG00000154640	467.483	179.41	755.557	4.21135	2.07428	1.24463e-45	5.01401e-44
C21orf91	ENSG00000154642	305.267	113.499	497.035	4.37922	2.13067	3.99162e-35	1.25574e-33
JAM2	ENSG00000154721	37.3628	24.0109	50.7148	2.11216	1.07872	0.00823425	0.0332168
ADAMTS5	ENSG00000154736	9.13772	2.83861	15.4368	5.43817	2.44312	0.00778354	0.0315977
SLFN13	ENSG00000154760	444.491	645.826	243.157	0.376506	-1.40926	1.65505e-14	2.37661e-13
CCDC144B	ENSG00000154874	55.1585	80.1752	30.1418	0.37595	-1.41139	0.00272681	0.0123003
RAB6B	ENSG00000154917	336.312	549.072	123.552	0.225019	-2.15188	1.59158e-31	4.50036e-30
VOPP1	ENSG00000154978	2759.53	1832.75	3686.3	2.01135	1.00816	6.49039e-26	1.53409e-24
KLF10	ENSG00000155090	688.729	331.511	1045.95	3.15509	1.65768	2.90284e-39	1.01349e-37
MARCKS	ENSG00000155130	1974.5	101.511	3847.49	37.9021	5.24421	0	0
TTC39B	ENSG00000155158	241.152	70.1434	412.16	5.87596	2.55482	3.79829e-41	1.4051e-39
SLC25A28	ENSG00000155287	1373.43	404.18	2342.68	5.79613	2.53509	5.50782e-111	6.31366e-109
SAMSN1	ENSG00000155307	248.192	43.151	453.234	10.5034	3.39279	7.80388e-64	4.57092e-62
USP25	ENSG00000155313	738.059	414.652	1061.47	2.5599	1.35609	2.18751e-27	5.41484e-26
GRAMD3	ENSG00000155324	74.6139	44.3406	104.887	2.36549	1.24214	3.01254e-05	0.000188215
MOV10	ENSG00000155363	4661.6	2056.71	7266.49	3.53306	1.82092	1.4737e-84	1.14421e-82
SLC16A1	ENSG00000155380	1017.41	1414.62	620.199	0.43842	-1.18961	5.70708e-16	8.89845e-15
PIK3AP1	ENSG00000155629	8686.58	5401.29	11971.9	2.21648	1.14827	4.6683e-39	1.62351e-37
DEPTOR	ENSG00000155792	20.5258	31.6689	9.38261	0.296272	-1.755	0.0037234	0.0162683
ACPL2	ENSG00000155893	115.283	156.236	74.3291	0.475749	-1.07173	1.48606e-05	9.69022e-05
SLA	ENSG00000155926	848.991	246.505	1451.48	5.88822	2.55783	3.29888e-91	2.87003e-89
PSD3	ENSG00000156011	1237.52	547.888	1927.14	3.51741	1.81451	1.36196e-13	1.82889e-12
GNAQ	ENSG00000156052	1542.29	2151.07	933.513	0.433977	-1.20431	2.45171e-29	6.47061e-28
ADK	ENSG00000156110	1204.11	1719.02	689.206	0.400929	-1.31858	2.17292e-31	6.07713e-30
C15orf26	ENSG00000156206	50.2658	12.8605	87.6712	6.81708	2.76915	3.29427e-12	4.03424e-11
CXCL13	ENSG00000156234	298.413	4.63061	592.196	127.887	6.99873	6.23217e-101	6.23427e-99
PCDH1	ENSG00000156453	48.9389	71.6954	26.1824	0.365189	-1.45328	0.000141183	0.000799081
FAM122C	ENSG00000156500	270.146	107.831	432.461	4.01054	2.0038	6.02661e-29	1.57039e-27
FBXO43	ENSG00000156509	19.8665	31.24	8.49301	0.271863	-1.87905	0.00155791	0.00736857
UBE2L6	ENSG00000156587	7438.61	2007.26	12870	6.41169	2.68071	3.80665e-84	2.93849e-82
NPTN	ENSG00000156642	2417.46	1589.94	3244.98	2.04095	1.02924	4.67099e-26	1.10797e-24
FBXO32	ENSG00000156804	1428.14	547.653	2308.62	4.21548	2.0757	3.11982e-79	2.26433e-77
BUB1B	ENSG00000156970	223.206	324.179	122.232	0.377053	-1.40716	4.68374e-13	6.10235e-12
GHRL	ENSG00000157017	135.191	195.006	75.3764	0.386533	-1.37134	4.56406e-09	4.36141e-08
ZFYVE9	ENSG00000157077	69.9146	104.365	35.4642	0.339809	-1.5572	8.06735e-07	6.12133e-06
ATP2B2	ENSG00000157087	42.3993	60.1368	24.6617	0.410093	-1.28598	0.00206398	0.00953421
TMEM171	ENSG00000157111	31.6834	1.93497	61.4318	31.7482	4.9886	6.3555e-17	1.05434e-15
NRG1	ENSG00000157168	1282.42	62.863	2501.99	39.8006	5.31472	0	0
SUSD3	ENSG00000157303	654.601	993.336	315.867	0.317986	-1.65297	1.51826e-35	4.79896e-34
ST3GAL2	ENSG00000157350	2381.2	696.486	4065.91	5.83775	2.54541	8.26268e-135	1.26107e-132
CACNA2D3	ENSG00000157445	46.7108	21.7747	71.647	3.29038	1.71826	0.00860832	0.0345705
FAM81A	ENSG00000157470	72.3511	101.562	43.1399	0.424762	-1.23527	0.000219178	0.00120305
MYO1E	ENSG00000157483	5565.92	3655.4	7476.45	2.04531	1.03232	2.52061e-19	4.7511e-18
ETS2	ENSG00000157557	1962.37	445.295	3479.44	7.81379	2.96602	2.07985e-165	4.08461e-163
MX1	ENSG00000157601	7406.27	620.982	14191.6	22.8534	4.51434	0	0
FMNL2	ENSG00000157827	796.521	365.176	1227.87	3.3624	1.74949	1.81677e-06	1.32834e-05
DRC1	ENSG00000157856	9.00144	1.93497	16.0679	8.30397	3.0538	0.00375681	0.0164009
TNFRSF14	ENSG00000157873	563.272	291.637	834.908	2.86283	1.51744	3.37379e-29	8.86043e-28
LDLRAP1	ENSG00000157978	1133.56	1876.59	390.527	0.208104	-2.26462	1.03797e-79	7.55401e-78
AGAP1	ENSG00000157985	333.5	476.076	190.924	0.401036	-1.31819	2.35405e-15	3.53624e-14
DUSP2	ENSG00000158050	582.43	145.898	1018.96	6.98409	2.80407	4.51703e-33	1.34051e-31
MRAS	ENSG00000158186	1089.04	662.015	1516.07	2.29008	1.1954	1.98312e-26	4.78042e-25
ESYT3	ENSG00000158220	20.462	32.9043	8.0197	0.243728	-2.03666	0.000844777	0.00421583
FAM46B	ENSG00000158246	29.1776	53.9794	4.37577	0.0810636	-3.6248	6.69107e-09	6.31045e-08
SLC13A3	ENSG00000158296	402.856	582.151	223.561	0.384026	-1.38072	2.3543e-19	4.45018e-18
CDC25C	ENSG00000158402	84.085	116.465	51.7051	0.443955	-1.17152	0.000104601	0.00060498
HIST1H4H	ENSG00000158406	89.2532	46.2603	132.246	2.85874	1.51538	2.50703e-08	2.2335e-07
B4GALT5	ENSG00000158470	3676.99	1884.39	5469.59	2.90257	1.53733	1.18914e-60	6.56212e-59
NCF1	ENSG00000158517	6243.17	1366.62	11119.7	8.13667	3.02444	1.65355e-216	5.73567e-214
PKD1L1	ENSG00000158683	12.9963	4.02818	21.9644	5.45267	2.44696	0.00135192	0.00647919
SLAMF8	ENSG00000158714	1785.9	619.926	2951.87	4.76164	2.25146	3.25934e-100	3.22421e-98
RNF166	ENSG00000158717	1371.47	1845.56	897.374	0.486233	-1.04028	1.24514e-21	2.52901e-20
NBL1	ENSG00000158747	228.763	92.3929	365.133	3.95196	1.98257	2.42051e-26	5.79816e-25
USF1	ENSG00000158773	2278.25	1139.06	3417.45	3.00024	1.58508	3.30085e-56	1.65098e-54
NPM2	ENSG00000158806	72.4537	119.012	25.8953	0.217586	-2.20034	6.4463e-08	5.49902e-07
CDA	ENSG00000158825	48.5468	85.143	11.9507	0.14036	-2.8328	4.47897e-11	5.02431e-10
PINK1	ENSG00000158828	601.627	859.038	344.216	0.4007	-1.31941	2.18659e-22	4.54135e-21
B4GALT3	ENSG00000158850	3414.85	4899.34	1930.37	0.394005	-1.34371	1.60183e-44	6.35708e-43
DMTN	ENSG00000158856	30.9831	46.6586	15.3076	0.328076	-1.6079	0.00327573	0.0144829
ADAMTS4	ENSG00000158859	208.366	364.655	52.0777	0.142814	-2.80779	2.06741e-37	6.8851e-36
APOA2	ENSG00000158874	5.52661	11.0532	0	0	#NUM!	0.00196112	0.0091095
CACHD1	ENSG00000158966	38.7785	21.0751	56.482	2.68003	1.42225	0.000854551	0.00426063
SYNJ1	ENSG00000159082	280.147	178.95	381.343	2.131	1.09153	9.93263e-11	1.08503e-09
IFNGR2	ENSG00000159128	3683.83	2120.76	5246.89	2.47406	1.30688	1.92047e-44	7.61036e-43
STC1	ENSG00000159167	241.429	58.0436	424.814	7.31888	2.87162	8.12642e-50	3.66018e-48
RCAN1	ENSG00000159200	1595.93	305.841	2886.02	9.43636	3.23823	1.3706e-178	3.15581e-176
UBE2Z	ENSG00000159202	3845.08	1707.38	5982.78	3.50408	1.80904	3.37558e-50	1.5307e-48
CBR3	ENSG00000159231	58.5343	36.2689	80.7996	2.22779	1.15561	0.000418003	0.00219686
BTG2	ENSG00000159388	6354.47	2549.26	10159.7	3.98535	1.99471	2.59098e-104	2.67191e-102
HK2	ENSG00000159399	1810.76	514.106	3107.4	6.04429	2.59557	2.66576e-128	3.74735e-126
STARD9	ENSG00000159433	56.4104	78.4039	34.4168	0.438968	-1.18781	0.000517508	0.00267767
ISL2	ENSG00000159556	70.0973	98.5754	41.6192	0.422207	-1.24398	8.98147e-05	0.000523883
GPR114	ENSG00000159618	1063.26	527.691	1598.83	3.02986	1.59925	2.38394e-44	9.41904e-43
SPON2	ENSG00000159674	110.893	182.763	39.0226	0.213514	-2.2276	5.51014e-16	8.61653e-15
PTGIR	ENSG00000160013	176.577	21.3763	331.777	15.5208	3.95613	3.72135e-59	1.97601e-57
IQCC	ENSG00000160051	30.2463	45.8161	14.6765	0.320335	-1.64235	0.00103583	0.00508144
NR2F6	ENSG00000160113	499.262	674.752	323.772	0.479839	-1.05938	7.28639e-14	9.95968e-13
ANKLE1	ENSG00000160117	52.6047	80.9926	24.2169	0.299001	-1.74178	5.25061e-06	3.61813e-05
FAM86C2P	ENSG00000160172	22.484	34.5381	10.43	0.301985	-1.72745	0.00293667	0.0131449
SLC37A1	ENSG00000160190	539.007	358.41	719.604	2.00777	1.00559	9.19678e-11	1.00877e-09
CBS	ENSG00000160200	1496.8	2453.93	539.673	0.219922	-2.18494	1.65894e-84	1.2843e-82
ICOSLG	ENSG00000160223	6278.48	4017.05	8539.92	2.12592	1.08809	3.06766e-34	9.35321e-33
LRRC3	ENSG00000160233	318.57	185.756	451.384	2.42999	1.28095	5.19582e-16	8.15366e-15
SPATC1L	ENSG00000160284	184.972	277.352	92.5925	0.333845	-1.58275	9.3308e-14	1.2657e-12
C21orf58	ENSG00000160298	148.294	237.826	58.763	0.247084	-2.01692	6.52349e-18	1.13805e-16
CACFD1	ENSG00000160325	199.87	286.389	113.352	0.395797	-1.33717	2.82164e-11	3.20831e-10
SLC2A6	ENSG00000160326	1766.27	451.304	3081.24	6.82742	2.77134	6.0425e-82	4.5334e-80
PPAPDC3	ENSG00000160539	130.538	193.332	67.7445	0.350405	-1.5129	1.16903e-09	1.17515e-08
SIK3	ENSG00000160584	1410.05	706.167	2113.93	2.99353	1.58185	6.25055e-49	2.75035e-47
ADAR	ENSG00000160710	14021	5913.76	22128.2	3.74181	1.90374	2.53139e-102	2.57076e-100
FAM189B	ENSG00000160767	920.762	531.199	1310.32	2.46673	1.3026	1.23843e-21	2.51729e-20
CCR5	ENSG00000160791	17.387	4.50293	30.2711	6.72254	2.74901	6.86856e-05	0.000406678
LY6E	ENSG00000160932	19814.6	12393.9	27235.4	2.19749	1.13586	4.1515e-40	1.49036e-38
PTGER1	ENSG00000160951	45.886	63.782	27.9901	0.43884	-1.18823	0.00243016	0.0110669
SQSTM1	ENSG00000161011	8394.13	4430.03	12358.2	2.78965	1.48008	6.18539e-56	3.07645e-54
NAPEPLD	ENSG00000161048	69.7345	101.465	38.0038	0.374549	-1.41677	1.17376e-05	7.72548e-05
MFSD12	ENSG00000161091	7673.48	4802.09	10544.9	2.19589	1.13481	1.83679e-12	2.285e-11
YDJC	ENSG00000161179	654.419	881.497	427.34	0.484789	-1.04457	3.24114e-15	4.82539e-14
BDH1	ENSG00000161267	329.019	550.252	107.786	0.195885	-2.35192	8.56822e-40	3.0432e-38
ACOX1	ENSG00000161533	1241.29	737.994	1744.58	2.36395	1.2412	3.05078e-30	8.28083e-29
MPP3	ENSG00000161647	111.811	159.279	64.3439	0.403971	-1.30768	2.15735e-07	1.74133e-06
CD300LG	ENSG00000161649	43.5252	62.5465	24.5039	0.391771	-1.35192	0.00105826	0.00517768
FAM171A2	ENSG00000161682	38.0809	59.0749	17.0868	0.289239	-1.78967	8.98858e-05	0.000524183
PLCD3	ENSG00000161714	225.401	312.084	138.717	0.444485	-1.16979	1.70651e-09	1.69062e-08
FMNL3	ENSG00000161791	2652.39	1427.38	3877.4	2.71645	1.44172	2.88653e-49	1.28494e-47
RACGAP1	ENSG00000161800	264.361	390.422	138.3	0.354233	-1.49723	1.93267e-16	3.11901e-15
GRASP	ENSG00000161835	220.942	4.20171	437.683	104.168	6.70276	8.59996e-114	1.03467e-111
SPC24	ENSG00000161888	152.056	205.968	98.1449	0.476506	-1.06943	2.53064e-06	1.82137e-05
ALOX15	ENSG00000161905	45.6878	16.2863	75.0894	4.6106	2.20495	3.07242e-08	2.71181e-07
CXCL16	ENSG00000161921	841.799	162.838	1520.76	9.33913	3.22329	1.34482e-34	4.15246e-33
SCIMP	ENSG00000161929	64.4362	21.0293	107.843	5.12823	2.35846	3.88457e-10	4.06078e-09
MEIOB	ENSG00000162039	78.1089	127.023	29.1952	0.229843	-2.12128	3.42906e-11	3.87096e-10
C16orf59	ENSG00000162062	101.613	140.588	62.6369	0.445535	-1.16639	1.92034e-05	0.000123472
CCNF	ENSG00000162063	319.742	450.497	188.987	0.419507	-1.25323	9.37111e-14	1.27052e-12
PAQR4	ENSG00000162073	400.244	543.655	256.832	0.472417	-1.08187	2.52001e-12	3.10314e-11
ADCY9	ENSG00000162104	1371.02	2145.69	596.355	0.277932	-1.8472	1.40063e-61	7.8923e-60
CYB561A3	ENSG00000162144	2084.51	759.998	3409.02	4.48556	2.16529	9.81471e-96	9.00829e-94
ASRGL1	ENSG00000162174	39.2517	57.0123	21.491	0.376955	-1.40754	0.00108636	0.00530352
GNG3	ENSG00000162188	4.93183	9.86365	0	0	#NUM!	0.00390753	0.01702
DCP1A	ENSG00000162290	1365.99	557.547	2174.42	3.89998	1.96347	4.51591e-70	2.90639e-68
RPS6KA4	ENSG00000162302	1144.78	1594.97	694.587	0.435485	-1.1993	7.44771e-26	1.75415e-24
LRP5	ENSG00000162337	231.652	324.057	139.247	0.4297	-1.2186	1.06492e-10	1.16093e-09
BEND5	ENSG00000162373	28.0585	49.1447	6.97233	0.141873	-2.81732	3.83191e-07	3.01462e-06
ELAVL4	ENSG00000162374	18.0895	3.28279	32.8962	10.0208	3.32492	0.00297084	0.0132733
ACOT11	ENSG00000162390	302.929	477.959	127.899	0.267594	-1.90188	2.42223e-27	5.98476e-26
FAM151A	ENSG00000162391	18.3083	32.2408	4.37577	0.135722	-2.88128	7.90792e-05	0.000465226
PARS2	ENSG00000162396	110.076	148.864	71.2877	0.478879	-1.06227	3.41547e-05	0.000211951
AK4	ENSG00000162433	154.859	65.3699	244.349	3.73795	1.90225	7.02353e-18	1.22209e-16
SLC25A34	ENSG00000162461	28.3004	12.8299	43.7709	3.41162	1.77046	0.000310961	0.00166809
DRAXIN	ENSG00000162490	143.913	216.409	71.417	0.33001	-1.59942	1.50549e-11	1.74979e-10
PDPN	ENSG00000162493	510.463	90.2691	930.658	10.3098	3.36595	2.56463e-107	2.77323e-105
UBXN10	ENSG00000162543	34.7788	49.7166	19.8411	0.399084	-1.32524	0.00285564	0.012823
CAMK2N1	ENSG00000162545	48.8216	68.2903	29.353	0.429826	-1.21817	0.00260369	0.0117848
CCDC27	ENSG00000162592	52.4319	78.3374	26.5264	0.338618	-1.56227	0.000113608	0.000652829
C1orf87	ENSG00000162598	4.9208	0.301214	9.54038	31.6731	4.98519	0.00344785	0.0151661
NEXN	ENSG00000162614	243.901	25.2004	462.601	18.3569	4.19825	3.18654e-34	9.69355e-33
SNX7	ENSG00000162627	84.1277	43.0539	125.202	2.90802	1.54004	1.4994e-07	1.23375e-06
WDR63	ENSG00000162643	43.9935	19.1096	68.8774	3.60434	1.84973	2.67562e-06	1.91847e-05
GBP2	ENSG00000162645	2088.9	165.957	4011.84	24.174	4.59539	1.03761e-82	7.85088e-81
GBP4	ENSG00000162654	6807.15	240.349	13374	55.644	5.79815	0	0
GFI1	ENSG00000162676	2331.83	3354.2	1309.46	0.390395	-1.35699	2.41735e-42	9.15816e-41
VCAM1	ENSG00000162692	7.2448	0.44418	14.0454	31.621	4.98281	0.00649705	0.0269414
SLC30A7	ENSG00000162695	737.204	488.272	986.136	2.01964	1.0141	5.48542e-17	9.14545e-16
NLRP3	ENSG00000162711	2873.53	1699.79	4047.28	2.38105	1.2516	6.7012e-39	2.31842e-37
IGSF8	ENSG00000162729	844.064	449.165	1238.96	2.75837	1.46382	2.53985e-34	7.76166e-33
ATF3	ENSG00000162772	3549.8	256.001	6843.6	26.7327	4.74054	0	0
IER5	ENSG00000162783	1183.88	722.81	1644.96	2.27578	1.18636	3.89845e-27	9.58781e-26
KIF26B	ENSG00000162849	213.699	309.327	118.072	0.381705	-1.38947	2.38288e-12	2.93833e-11
PKDCC	ENSG00000162878	812.991	1357.24	268.739	0.198004	-2.3364	3.45065e-26	8.23623e-25
REL	ENSG00000162924	643.191	123.475	1162.91	9.41819	3.23545	5.12366e-18	8.98541e-17
VSNL1	ENSG00000163032	104.025	58.0283	150.021	2.58531	1.37034	7.17887e-08	6.10056e-07
CCDC74A	ENSG00000163040	83.4197	125.665	41.1744	0.327652	-1.60976	8.7354e-08	7.37168e-07
ADCK3	ENSG00000163050	1607.43	2152.73	1062.14	0.493395	-1.01919	5.28896e-22	1.0833e-20
INHBB	ENSG00000163083	31.2672	43.927	18.6075	0.4236	-1.23923	0.00915939	0.0365295
OTUD7B	ENSG00000163113	342.697	212.278	473.117	2.22876	1.15624	9.27245e-05	0.000540148
NEURL3	ENSG00000163121	125.647	0.301214	250.993	833.27	9.70264	2.97867e-68	1.85448e-66
CTSS	ENSG00000163131	5875.55	2418.99	9332.11	3.85785	1.9478	5.95067e-99	5.82185e-97
MSX1	ENSG00000163132	189.699	105.81	273.588	2.58565	1.37053	2.10359e-12	2.60598e-11
RNF149	ENSG00000163162	1641.66	707.826	2575.5	3.6386	1.86339	8.0471e-69	5.05718e-67
ARHGAP25	ENSG00000163219	1820.32	884.003	2756.63	3.11835	1.64078	1.12779e-38	3.87174e-37
S100A9	ENSG00000163220	133.233	27.1812	239.285	8.80332	3.13805	1.07872e-34	3.35018e-33
TGFA	ENSG00000163235	68.6632	32.4961	104.83	3.22593	1.68971	2.33447e-08	2.0826e-07
FZD5	ENSG00000163251	107.819	63.9096	151.728	2.3741	1.24738	1.23419e-06	9.16688e-06
GPR155	ENSG00000163328	30.4489	4.63061	56.2672	12.1511	3.60302	1.09258e-11	1.28838e-10
CLDN1	ENSG00000163347	81.6158	3.12454	160.107	51.2417	5.67925	3.86394e-44	1.51991e-42
KBTBD8	ENSG00000163376	144.711	95.0121	194.41	2.04616	1.03292	9.5416e-07	7.17878e-06
NBPF10	ENSG00000163386	878.892	511.093	1246.69	2.43927	1.28645	1.09821e-07	9.1634e-07
SLC22A15	ENSG00000163393	790.967	1168.48	413.451	0.353836	-1.49885	1.87297e-33	5.60821e-32
SLC15A2	ENSG00000163406	44.0603	59.2125	28.9082	0.488211	-1.03442	0.00697937	0.0286876
FSTL1	ENSG00000163430	40.6195	23.7096	57.5293	2.42641	1.27882	0.00116368	0.00565412
SRGAP2	ENSG00000163486	3308.82	1524.83	5092.8	3.33992	1.73981	9.00472e-73	6.02775e-71
STT3B	ENSG00000163527	3437.68	4697.4	2177.97	0.463655	-1.10888	2.56679e-31	7.16366e-30
IFI16	ENSG00000163565	2175.35	558.237	3792.46	6.79363	2.76418	1.449e-35	4.58548e-34
AIM2	ENSG00000163568	58.1879	3.88522	112.491	28.9535	4.85567	7.93027e-28	1.99444e-26
ATXN7	ENSG00000163635	487.798	270.827	704.77	2.60229	1.37978	6.62274e-18	1.15461e-16
PPM1K	ENSG00000163644	1077.14	190.417	1963.86	10.3135	3.36646	1.74481e-160	3.28183e-158
TIPARP	ENSG00000163659	452.051	272.441	631.661	2.31852	1.21321	9.50325e-18	1.63968e-16
CCNL1	ENSG00000163660	1586.27	975.282	2197.26	2.25295	1.17182	3.1921e-28	8.15084e-27
PTX3	ENSG00000163661	147.271	50.6661	243.876	4.81339	2.26705	2.44569e-22	5.07381e-21
HESX1	ENSG00000163666	362.046	20.2533	703.838	34.7518	5.11901	3.24106e-141	5.31077e-139
ABHD6	ENSG00000163686	216.089	136.238	295.94	2.17223	1.11918	1.78445e-09	1.76653e-08
RBM47	ENSG00000163694	1148.62	523.408	1773.83	3.389	1.76086	7.88595e-54	3.80879e-52
PCOLCE2	ENSG00000163710	45.2198	18.6501	71.7895	3.84928	1.94459	7.26275e-07	5.55182e-06
CXCL3	ENSG00000163734	917.012	9.13354	1824.89	199.801	7.64242	0	0
CXCL5	ENSG00000163735	34.4172	0.903642	67.9308	75.1745	6.23217	1.70341e-20	3.33306e-19
PPBP	ENSG00000163736	10.9679	0.602428	21.3333	35.4122	5.14617	2.09956e-06	1.52757e-05
MTHFD2L	ENSG00000163738	73.8467	44.1976	103.496	2.34166	1.22753	3.50152e-05	0.000216636
CXCL1	ENSG00000163739	1312.76	16.8734	2608.66	154.602	7.27241	1.84063e-211	6.0693e-209
TCF23	ENSG00000163792	11.5765	23.1531	0	0	#NUM!	1.36487e-06	1.00897e-05
PLB1	ENSG00000163803	517.072	774.63	259.514	0.335017	-1.5777	5.33589e-28	1.35087e-26
KIF15	ENSG00000163808	78.6383	119.875	37.4012	0.312001	-1.68038	4.70013e-08	4.06133e-07
LZTFL1	ENSG00000163818	196.306	267.31	125.302	0.468754	-1.0931	4.58083e-08	3.96466e-07
CCR1	ENSG00000163823	1567.19	949.291	2185.08	2.30181	1.20277	9.64584e-30	2.58147e-28
DTX3L	ENSG00000163840	4321.37	1260.99	7381.75	5.85394	2.54941	1.2744e-154	2.29985e-152
NMNAT3	ENSG00000163864	41.9076	58.5795	25.2357	0.430795	-1.21493	0.00398228	0.0173004
TPRA1	ENSG00000163870	2539.33	1083.62	3995.05	3.68678	1.88236	1.99509e-30	5.45414e-29
YEATS2	ENSG00000163872	1006.48	429.846	1583.1	3.68296	1.88087	1.35625e-57	6.9262e-56
ZC3H12A	ENSG00000163874	3317.78	720.334	5915.22	8.21179	3.0377	6.4135e-112	7.51308e-110
KLF15	ENSG00000163884	16.6589	31.9548	1.36291	0.0426512	-4.55127	4.28899e-07	3.36036e-06
S100P	ENSG00000163993	23.5076	37.7903	9.22484	0.244106	-2.03442	0.00046844	0.00244223
SGMS2	ENSG00000164023	16.9267	26.5941	7.25936	0.272969	-1.87319	0.00597421	0.0249828
BDH2	ENSG00000164039	56.3538	35.5235	77.1842	2.17276	1.11953	0.000869621	0.00432688
ZNF589	ENSG00000164048	78.2539	109.623	46.8846	0.427688	-1.22537	0.00420444	0.0181709
SPRY1	ENSG00000164056	135.96	22.8366	249.084	10.9072	3.44722	1.13458e-40	4.12855e-39
GRM2	ENSG00000164082	33.9085	17.7618	50.0552	2.81814	1.49474	0.000450223	0.00235369
DUSP7	ENSG00000164086	5883.59	8905.62	2861.56	0.32132	-1.63792	1.49452e-70	9.68865e-69
POC1A	ENSG00000164087	534.888	755.071	314.705	0.416789	-1.26261	2.56976e-19	4.84032e-18
PRSS12	ENSG00000164099	773.941	1166.29	381.589	0.327181	-1.61184	2.51076e-36	8.09903e-35
HMGB2	ENSG00000164104	1575.79	2349.66	801.924	0.341294	-1.55091	2.37743e-30	6.47946e-29
MAD2L1	ENSG00000164109	214.966	308.087	121.845	0.395488	-1.33829	7.38828e-12	8.84111e-11
FAM198B	ENSG00000164125	11.8487	3.72697	19.9704	5.35834	2.42179	0.00174595	0.00818545
IL15	ENSG00000164136	27.0214	1.20486	52.838	43.8542	5.45464	9.57127e-15	1.39161e-13
OTUD4	ENSG00000164164	1158.54	652.983	1664.09	2.54845	1.34962	2.28109e-33	6.79973e-32
TMEM184C	ENSG00000164168	926.735	579.633	1273.84	2.19766	1.13597	1.20556e-21	2.45235e-20
ITGA2	ENSG00000164171	122.669	45.1318	200.205	4.43602	2.14926	5.46497e-18	9.55886e-17
ELOVL7	ENSG00000164181	112.681	25.7876	199.574	7.73917	2.95218	1.2704e-28	3.2752e-27
STARD4	ENSG00000164211	1051.24	609.015	1493.45	2.45224	1.2941	5.98037e-30	1.61343e-28
PGGT1B	ENSG00000164219	148.257	98.4477	198.067	2.0119	1.00856	1.18612e-05	7.80108e-05
ANKRD33B	ENSG00000164236	155.459	99.479	211.44	2.12547	1.08778	0.000502997	0.00260662
CMBL	ENSG00000164237	24.9224	45.469	4.37577	0.0962362	-3.37728	3.50181e-06	2.47958e-05
SPINK1	ENSG00000164266	65.1947	27.0077	103.382	3.82786	1.93654	0.0071655	0.0293758
GRPEL2	ENSG00000164284	150.725	227.967	73.4832	0.322341	-1.63334	3.77459e-12	4.60555e-11
RHOBTB3	ENSG00000164292	71.1576	19.079	123.236	6.45924	2.69137	1.23504e-16	2.02109e-15
CASP3	ENSG00000164305	762.337	493.005	1031.67	2.09262	1.06531	9.25483e-18	1.59888e-16
ERAP2	ENSG00000164308	74.4189	30.4793	118.359	3.88324	1.95726	2.6257e-10	2.78182e-09
RICTOR	ENSG00000164327	751.828	476.192	1027.46	2.15767	1.10947	4.36413e-10	4.54254e-09
EBF1	ENSG00000164330	147.541	10.262	284.82	27.7549	4.79467	7.41246e-42	2.78452e-40
TLR3	ENSG00000164342	44.9828	1.34782	88.6178	65.7489	6.03889	4.49148e-14	6.24157e-13
TERT	ENSG00000164362	25.491	49.4612	1.52068	0.0307449	-5.02351	2.44475e-11	2.78927e-10
CSF2	ENSG00000164400	77.5709	1.93497	153.207	79.178	6.30703	2.01119e-21	4.05411e-20
MB21D1	ENSG00000164430	1693.9	535.416	2852.38	5.32742	2.41344	7.80954e-111	8.91389e-109
CREBRF	ENSG00000164463	296.01	197.09	394.931	2.00381	1.00275	7.68594e-10	7.83227e-09
TMEM200A	ENSG00000164484	53.312	31.276	75.3479	2.40913	1.26851	0.000113047	0.000649747
ANKRD55	ENSG00000164512	21.7376	35.5847	7.89044	0.221737	-2.17308	0.000170803	0.00095399
STK17A	ENSG00000164543	589.925	262.521	917.329	3.49431	1.80501	4.81576e-41	1.77658e-39
TRA2A	ENSG00000164548	610.674	395.032	826.316	2.09177	1.06473	1.71329e-16	2.77167e-15
C7orf60	ENSG00000164603	191.348	97.687	285.008	2.91757	1.54476	1.13331e-10	1.23348e-09
GPR85	ENSG00000164604	479.908	90.2178	869.599	9.63888	3.26887	3.74113e-97	3.5308e-95
CDCA7L	ENSG00000164649	169.269	271.21	67.3282	0.248251	-2.01013	4.0636e-19	7.57394e-18
KIAA1324L	ENSG00000164659	48.4892	24.4856	72.4928	2.96063	1.56591	2.2079e-05	0.000140809
SYTL3	ENSG00000164674	1272.22	112.13	2432.3	21.6918	4.43908	1.45096e-251	6.45894e-249
HEY1	ENSG00000164683	41.2649	27.023	55.5068	2.05406	1.03848	0.00659698	0.0273183
SHH	ENSG00000164690	6.07267	11.385	0.76034	0.0667844	-3.90435	0.0108899	0.0425356
TAGAP	ENSG00000164691	837.3	229.233	1445.37	6.30522	2.65655	4.86129e-97	4.57184e-95
CTSB	ENSG00000164733	32775.2	17856.4	47694	2.67098	1.41737	2.57615e-61	1.44551e-59
HNF4G	ENSG00000164749	180.606	84.8418	276.371	3.25748	1.70376	1.36762e-16	2.23003e-15
TNFRSF11B	ENSG00000164761	13.8291	2.23618	25.422	11.3685	3.50697	7.90836e-06	5.32588e-05
OSGIN2	ENSG00000164823	893.057	556.777	1229.34	2.20795	1.14271	1.92045e-22	3.99792e-21
UNCX	ENSG00000164853	40.141	54.8885	25.3935	0.462638	-1.11204	0.0129363	0.0495433
NOS3	ENSG00000164867	38.6567	57.63	19.6833	0.341547	-1.54985	0.000318163	0.00170365
DCSTAMP	ENSG00000164935	435.885	237.04	634.731	2.67774	1.42102	1.88559e-22	3.92841e-21
TP53INP1	ENSG00000164938	191.127	285.444	96.8105	0.339157	-1.55998	2.37998e-11	2.71886e-10
GEM	ENSG00000164949	795.707	228.728	1362.69	5.95767	2.57475	3.81391e-89	3.15374e-87
PDP1	ENSG00000164951	536.265	249.773	822.758	3.29403	1.71985	3.44477e-36	1.10585e-34
PSIP1	ENSG00000164985	242.458	367.993	116.923	0.317732	-1.65412	4.74e-19	8.77952e-18
DIRAS2	ENSG00000165023	118.424	51.9222	184.926	3.56161	1.83253	5.33968e-14	7.3628e-13
SYK	ENSG00000165025	1779.24	2674.45	884.032	0.330547	-1.59707	1.25642e-51	5.81592e-50
NFIL3	ENSG00000165030	977.394	613.188	1341.6	2.18791	1.12955	2.57771e-17	4.35747e-16
FXN	ENSG00000165060	77.4622	105.156	49.7682	0.473278	-1.07924	0.000400205	0.00211075
GKAP1	ENSG00000165113	11.4485	19.4108	3.48616	0.179599	-2.47715	0.00418933	0.0181173
SVEP1	ENSG00000165124	36.648	22.5812	50.7148	2.24588	1.16728	0.00796354	0.0322443
ANKS6	ENSG00000165138	195.061	295.507	94.615	0.320179	-1.64305	1.10072e-15	1.69057e-14
FBP1	ENSG00000165140	29.3915	48.1952	10.5878	0.219685	-2.18649	3.62761e-05	0.000223971
CYBB	ENSG00000165168	1049.03	494.169	1603.89	3.24564	1.6985	9.24985e-49	4.05007e-47
MID1IP1	ENSG00000165175	3057.42	4423.56	1691.28	0.382335	-1.38709	1.21163e-46	5.00953e-45
NCF1C	ENSG00000165178	1521.24	368.1	2674.39	7.26537	2.86104	5.607e-141	9.13155e-139
STRBP	ENSG00000165209	381.071	536.329	225.814	0.421036	-1.24799	8.21526e-16	1.26833e-14
ZNF367	ENSG00000165244	104.512	147.878	61.1448	0.41348	-1.27411	1.29938e-06	9.62429e-06
NLGN4Y	ENSG00000165246	59.3856	26.9106	91.8606	3.41355	1.77127	2.57111e-07	2.05851e-06
OTUD1	ENSG00000165312	642.876	270.378	1015.37	3.75538	1.90896	1.42128e-48	6.18255e-47
LRFN5	ENSG00000165379	57.3695	6.42261	108.316	16.8648	4.07595	1.56306e-23	3.39136e-22
ANXA8	ENSG00000165390	16.1022	26.9106	5.29388	0.196721	-2.34578	0.00108417	0.00529573
GJB2	ENSG00000165474	5.3656	0.301214	10.43	34.6265	5.1138	0.00139094	0.00664708
AKR1E2	ENSG00000165568	12.2805	19.712	4.84908	0.245996	-2.02329	0.0114226	0.0443374
ZNF503	ENSG00000165655	169.214	107.107	231.322	2.15974	1.11086	1.39226e-07	1.15234e-06
TMEM52B	ENSG00000165685	7.86193	0	15.7239	#DIV/0!	#DIV/0!	4.10062e-06	2.87237e-05
FRMD7	ENSG00000165694	6.59216	0	13.1843	#DIV/0!	#DIV/0!	5.14995e-05	0.000310777
AK8	ENSG00000165695	30.7277	7.46922	53.9862	7.22781	2.85356	1.1066e-07	9.22767e-07
FAM69B	ENSG00000165716	52.0084	76.6578	27.359	0.356898	-1.48642	8.94651e-05	0.000521958
ZMYND19	ENSG00000165724	596.296	862.607	329.984	0.382543	-1.38631	2.90503e-24	6.50927e-23
STK32C	ENSG00000165752	278.232	392.326	164.139	0.418373	-1.25714	1.64011e-12	2.05179e-11
KIAA1462	ENSG00000165757	335.992	575.217	96.7667	0.168226	-2.57152	4.61138e-48	1.97697e-46
ARHGEF40	ENSG00000165801	811.277	500.285	1122.27	2.24326	1.1656	3.49349e-22	7.22754e-21
CASP7	ENSG00000165806	1122.79	354.53	1891.05	5.33396	2.41521	9.02086e-94	8.05813e-92
TTC7B	ENSG00000165914	608.982	323.546	894.418	2.76442	1.46698	4.31484e-29	1.12985e-27
IFI27	ENSG00000165949	766.498	158.518	1374.48	8.67081	3.11617	5.53517e-118	6.9408e-116
PTPLA	ENSG00000165996	107.655	155.241	60.0689	0.38694	-1.36982	2.67109e-07	2.13407e-06
ARL5B	ENSG00000165997	536.923	205.626	868.22	4.22232	2.07804	1.98111e-50	9.01423e-49
ABTB2	ENSG00000166016	1188.88	542.977	1834.78	3.37911	1.75664	6.95393e-34	2.09867e-32
JAM3	ENSG00000166086	23.9744	36.6007	11.3481	0.310051	-1.68942	0.00240863	0.01098
ADAMTS15	ENSG00000166106	277.561	465.543	89.5796	0.19242	-2.37767	2.54121e-36	8.18735e-35
RAB8B	ENSG00000166128	1362.62	386.138	2339.1	6.05766	2.59876	4.81087e-116	5.86728e-114
CKB	ENSG00000166165	4900.74	2071.85	7729.63	3.73078	1.89948	3.65519e-92	3.20087e-90
TRMT61A	ENSG00000166166	498.637	326.874	670.399	2.05094	1.03628	3.04984e-11	3.45601e-10
LARP6	ENSG00000166173	26.4735	46.735	6.21199	0.132919	-2.91138	5.54809e-07	4.30392e-06
GABRB3	ENSG00000166206	11.2757	19.5385	3.01286	0.154201	-2.69712	0.00486421	0.0207371
SGPL1	ENSG00000166224	980.273	391.653	1568.89	4.00582	2.0021	1.72844e-31	4.85947e-30
C2	ENSG00000166278	90.6092	26.4053	154.813	5.86296	2.55163	6.71955e-19	1.23349e-17
SYNPO2L	ENSG00000166317	38.6343	55.3327	21.9359	0.396436	-1.33484	0.00263639	0.0119227
SERPINB7	ENSG00000166396	49.7824	0	99.5648	#DIV/0!	#DIV/0!	2.66261e-34	8.1275e-33
LMO1	ENSG00000166407	14.3433	27.166	1.52068	0.0559774	-4.15901	5.6219e-06	3.86103e-05
PLD4	ENSG00000166428	3736.16	2385.36	5086.96	2.13257	1.09259	4.41166e-17	7.39215e-16
ZMAT1	ENSG00000166432	50.8854	71.0264	30.7444	0.432859	-1.20803	0.00104016	0.00509847
MFAP4	ENSG00000166482	162.737	263.94	61.5325	0.23313	-2.10079	1.42461e-12	1.79566e-11
CLEC4E	ENSG00000166523	6.87919	0	13.7584	#DIV/0!	#DIV/0!	2.03617e-05	0.000130605
CENPV	ENSG00000166582	762.894	1109.44	416.35	0.375279	-1.41396	6.22976e-29	1.62174e-27
RRAD	ENSG00000166592	15.042	1.04661	29.0374	27.7443	4.79412	2.67346e-08	2.37653e-07
[truncated: 1,406 more rows]

## Sheet: TF
genename	id	baseMean	baseMeanRa	baseMeanTHPP	foldChange	log2FoldChange	pval	padj
ARX	ENSG00000004848	52.7109	18.7367	86.6851	0.216147	-2.20992	3.90197e-08	3.39804e-07
E2F2	ENSG00000007968	77.3599	43.4269	111.293	0.390204	-1.3577	8.7592e-06	5.86781e-05
ETV7	ENSG00000010030	384.564	763.292	5.83547	130.802	7.03124	5.73474e-183	1.43149e-180
HIVEP2	ENSG00000010818	673.268	1312.16	34.3798	38.1664	5.25423	1.98102e-60	1.08647e-58
RUNX3	ENSG00000020633	8094.31	13415	2773.58	4.83673	2.27403	1.288e-134	1.95461e-132
POU2F2	ENSG00000028277	3161.58	4610.52	1712.64	2.69205	1.42871	1.351e-12	1.70609e-11
ARNTL2	ENSG00000029153	277.003	402.762	151.243	2.66301	1.41306	1.44661e-12	1.81994e-11
NFE2L3	ENSG00000050344	413.487	744.196	82.7792	8.99013	3.16834	2.19846e-83	1.68731e-81
FOXC1	ENSG00000054598	95.1255	135.761	54.4902	2.49147	1.317	7.56441e-07	5.76428e-06
PRDM1	ENSG00000057657	1117.33	2038.92	195.742	10.4164	3.38078	3.68802e-163	7.03595e-161
MXD1	ENSG00000059728	2264.89	3937.17	592.617	6.6437	2.73199	1.01771e-140	1.63747e-138
DLX3	ENSG00000064195	267.468	49.1656	485.771	0.101211	-3.30456	2.44022e-49	1.08808e-47
KLF6	ENSG00000067082	2480.4	3717.32	1243.48	2.98946	1.57988	9.65371e-58	4.94896e-56
TCF3	ENSG00000071564	1377.87	918.262	1837.47	0.499743	-1.00074	2.91517e-20	5.64903e-19
SREBF1	ENSG00000072310	2630.59	1314.61	3946.56	0.333104	-1.58596	2.94606e-57	1.49879e-55
NFATC3	ENSG00000072736	1154.13	662.463	1645.8	0.402517	-1.31288	3.88243e-31	1.0768e-29
TP63	ENSG00000073282	8.44917	14.361	2.5374	5.65972	2.50073	0.00719131	0.029459
TBX21	ENSG00000073861	15.0406	26.0531	4.02818	6.4677	2.69325	0.000173957	0.000970589
TEAD2	ENSG00000074219	20.5896	9.38261	31.7966	0.295083	-1.76081	0.00391016	0.0170286
TXK	ENSG00000074966	74.3882	34.6754	114.101	0.303901	-1.71833	4.82285e-08	4.16064e-07
FOSL2	ENSG00000075426	5618.03	9099.35	2136.7	4.25859	2.09038	2.64397e-111	3.05705e-109
NFKB2	ENSG00000077150	4815.1	8642.09	988.113	8.74605	3.12863	1.40596e-186	3.6458e-184
HOXA9	ENSG00000078399	390.016	233.174	546.857	0.426389	-1.22976	4.30116e-15	6.34344e-14
TP73	ENSG00000078900	351.416	189.747	513.084	0.369816	-1.43512	1.0664e-18	1.93759e-17
TFAP2C	ENSG00000087510	94.166	159.103	29.2286	5.44341	2.44451	1.38797e-08	1.26826e-07
EBF4	ENSG00000088881	25.1386	40.5718	9.7054	4.18033	2.06362	9.20692e-05	0.000536565
TFAP4	ENSG00000090447	126.547	27.072	226.022	0.119776	-3.0616	2.63821e-19	4.95875e-18
TBX15	ENSG00000092607	377.412	596.269	158.554	3.76067	1.91099	8.38825e-35	2.61121e-33
CREM	ENSG00000095794	1677.79	3112.25	243.329	12.7903	3.67698	1.49209e-169	3.04214e-167
HIVEP1	ENSG00000095951	340.043	548.953	131.133	4.18624	2.06566	3.98033e-36	1.27471e-34
HIF1A	ENSG00000100644	2816.53	4696.04	937.013	5.01172	2.3253	8.59712e-53	4.0569e-51
E2F1	ENSG00000101412	464.904	305.68	624.127	0.489772	-1.02982	4.84401e-13	6.305e-12
KLF8	ENSG00000102349	19.972	8.0197	31.9243	0.25121	-1.99303	0.00173303	0.00813061
FOXF1	ENSG00000103241	26.7242	44.1872	9.26122	4.77121	2.25436	1.16596e-05	7.67981e-05
MAZ	ENSG00000103495	1124.75	734.946	1514.55	0.485257	-1.04318	2.22037e-05	0.000141571
MYEF2	ENSG00000104177	91.0697	40.127	142.012	0.28256	-1.82337	2.83525e-10	2.99315e-09
TRPS1	ENSG00000104447	523.697	784.25	263.144	2.98031	1.57546	2.87151e-30	7.80216e-29
RELB	ENSG00000104856	2402.23	4082.93	721.534	5.65868	2.50047	6.31607e-53	3.00171e-51
DBP	ENSG00000105516	68.0482	19.8411	116.255	0.170668	-2.55073	3.13011e-13	4.1163e-12
HBP1	ENSG00000105856	631.429	845.811	417.046	2.0281	1.02013	2.76991e-15	4.14231e-14
TFEC	ENSG00000105967	1258.58	2168.4	348.756	6.21752	2.63634	2.07711e-60	1.13683e-58
HOXA13	ENSG00000106031	133.248	75.635	190.861	0.396282	-1.3354	4.72976e-08	4.08561e-07
GLI3	ENSG00000106571	82.459	150.567	14.3513	10.4915	3.39115	1.802e-25	4.18156e-24
LHX2	ENSG00000106689	217.213	327.401	107.025	3.05912	1.61312	6.66823e-17	1.10485e-15
TLE4	ENSG00000106829	1357.76	1882.27	833.256	2.25894	1.17564	1.24545e-27	3.10596e-26
GLIS3	ENSG00000107249	264.931	439.276	90.5856	4.84929	2.27777	4.05241e-37	1.33295e-35
EBF3	ENSG00000108001	43.8901	12.2662	75.514	0.162436	-2.62206	9.7828e-08	8.20889e-07
DLX4	ENSG00000108813	75.95	39.5244	112.376	0.351717	-1.50751	1.16174e-06	8.65279e-06
NFKB1	ENSG00000109320	3727.03	6515.29	938.765	6.94029	2.795	1.20798e-174	2.56063e-172
KLF3	ENSG00000109787	296.784	433.222	160.346	2.70179	1.43392	3.93241e-18	6.94189e-17
FOXM1	ENSG00000111206	291.694	189.346	394.042	0.480523	-1.05732	2.74208e-07	2.18817e-06
CUX2	ENSG00000111249	75.8902	31.4762	120.304	0.261639	-1.93435	2.03762e-09	2.00674e-08
VDR	ENSG00000111424	810.928	1101.68	520.175	2.11791	1.08264	1.06315e-18	1.933e-17
TFEB	ENSG00000112561	1197.8	1778.82	616.78	2.88405	1.5281	4.92283e-32	1.41533e-30
BCL6	ENSG00000113916	1613.42	2502.08	724.76	3.45229	1.78755	6.82915e-63	3.93103e-61
BBX	ENSG00000114439	309.305	425.329	193.281	2.20058	1.13788	1.13971e-08	1.05076e-07
STAT1	ENSG00000115415	16149	27797.2	4500.73	6.17616	2.62671	8.96852e-184	2.25981e-181
DLX2	ENSG00000115844	14.8035	4.97834	24.6286	0.202137	-2.3066	0.00339967	0.0149739
EPAS1	ENSG00000116016	180.057	253.144	106.969	2.36652	1.24277	2.48657e-10	2.64597e-09
VAX2	ENSG00000116035	59.8922	92.8073	26.9772	3.44022	1.7825	7.71128e-08	6.53636e-07
NFE2L2	ENSG00000116044	2703.08	4127.83	1278.33	3.22909	1.69113	3.8188e-66	2.30761e-64
TFAP2E	ENSG00000116819	32.1845	20.3144	44.0547	0.461118	-1.11679	0.0112321	0.0436995
ETV3	ENSG00000117036	760.609	1213.45	307.765	3.94279	1.97922	6.40868e-55	3.1465e-53
IRF6	ENSG00000117595	40.7198	76.9979	4.4418	17.3348	4.1156	9.58549e-19	1.74519e-17
PROX1	ENSG00000117707	16.1373	25.709	6.56558	3.91573	1.96928	0.00201676	0.00934243
PLAGL1	ENSG00000118495	932.344	1594.95	269.735	5.91305	2.5639	1.5814e-29	4.19439e-28
MYB	ENSG00000118513	3160.34	1600.21	4720.47	0.338994	-1.56067	4.38972e-58	2.25906e-56
KLF12	ENSG00000118922	55.2028	33.5995	76.8061	0.437458	-1.19278	0.00113297	0.00551999
NR4A3	ENSG00000119508	643.831	1225.62	62.0412	19.7549	4.30414	2.5381e-172	5.29609e-170
ONECUT2	ENSG00000119547	191.384	90.1099	292.657	0.307903	-1.69945	3.34249e-09	3.23576e-08
BCL11A	ENSG00000119866	43.8906	64.2146	23.5667	2.72481	1.44615	0.000196092	0.00108458
MXI1	ENSG00000119950	239.599	129.262	349.936	0.369387	-1.43679	1.77858e-14	2.54577e-13
TBX2	ENSG00000121068	662.442	984.486	340.399	2.89216	1.53215	9.00358e-33	2.64842e-31
NEUROG3	ENSG00000122859	39.2673	24.5039	54.0307	0.453518	-1.14077	0.00859333	0.0345193
BHLHE41	ENSG00000123095	75.2394	147.339	3.13982	46.9259	5.55231	2.15108e-32	6.25852e-31
NR4A1	ENSG00000123358	439.044	830.449	47.6387	17.4322	4.12369	8.8639e-51	4.04003e-49
NFE2	ENSG00000123405	106.921	34.8616	178.981	0.194779	-2.36009	2.32355e-17	3.9403e-16
BATF3	ENSG00000123685	82.3877	111.143	53.6324	2.07231	1.05124	0.00788394	0.0319678
SNAI1	ENSG00000124216	1734.81	3062.05	407.566	7.51302	2.90939	7.95413e-64	4.64873e-62
IRF1	ENSG00000125347	3790.07	6634.9	945.238	7.01929	2.81132	5.37925e-179	1.27146e-176
FOSB	ENSG00000125740	72.8968	130.094	15.6991	8.28673	3.0508	6.1348e-19	1.12925e-17
MAX	ENSG00000125952	1893.37	2624.03	1162.71	2.25681	1.17429	1.81539e-31	5.09319e-30
THRA	ENSG00000126351	184.555	104.701	264.41	0.39598	-1.3365	1.74478e-10	1.87379e-09
NR1D1	ENSG00000126368	38.141	24.2169	52.0652	0.465126	-1.10431	0.0113167	0.0439904
STAT5A	ENSG00000126561	1503.19	2202.46	803.925	2.73964	1.45398	8.3221e-43	3.18902e-41
SIX1	ENSG00000126778	102.375	159.949	44.8	3.57029	1.83604	2.84989e-12	3.50288e-11
ATF4	ENSG00000128272	8903.55	5340.74	12466.4	0.428412	-1.22293	6.1697e-44	2.40916e-42
IRF5	ENSG00000128604	2185.34	2949.12	1421.56	2.07456	1.05281	8.84455e-27	2.15341e-25
E2F8	ENSG00000129173	169.289	38.2623	300.316	0.127407	-2.97249	1.26306e-33	3.79472e-32
FOXA1	ENSG00000129514	186.348	320.028	52.6676	6.07637	2.60321	2.59128e-35	8.17127e-34
TULP4	ENSG00000130338	326.472	439.935	213.008	2.06535	1.04638	6.54143e-11	7.24657e-10
PRDM12	ENSG00000130711	7.32609	0.76034	13.8918	0.0547329	-4.19145	0.00173529	0.00813978
NPAS1	ENSG00000130751	53.7459	27.3875	80.1042	0.341898	-1.54836	3.90282e-05	0.000239798
BARX1	ENSG00000131668	2332.11	1445.93	3218.29	0.449285	-1.1543	9.38524e-31	2.58157e-29
LHX1	ENSG00000132130	6.51327	13.0265	0	#DIV/0!	#NAME?	5.30489e-05	0.000319536
PPARG	ENSG00000132170	165.015	104.442	225.588	0.462978	-1.11098	2.31178e-07	1.8598e-06
CTNNBL1	ENSG00000132792	1144.15	1635.22	653.085	2.50384	1.32414	3.53249e-22	7.30257e-21
BHLHE40	ENSG00000134107	4187.34	6882.26	1492.42	4.61148	2.20523	5.19234e-118	6.54162e-116
ETS1	ENSG00000134954	1213	1657.85	768.141	2.15826	1.10987	3.59816e-24	8.02198e-23
TBX3	ENSG00000135111	428.387	728.443	128.33	5.67633	2.50496	3.22217e-60	1.74921e-58
HEY2	ENSG00000135547	36.5032	9.38261	63.6237	0.14747	-2.7615	1.83865e-08	1.66188e-07
SP110	ENSG00000135899	3444.49	6043.86	845.131	7.15139	2.83822	2.98905e-176	6.65288e-174
SKIL	ENSG00000136603	561.36	896.555	226.165	3.96415	1.98701	4.12616e-48	1.77465e-46
HLX	ENSG00000136630	2539.48	3666.45	1412.51	2.59571	1.37613	8.85539e-39	3.044e-37
KLF4	ENSG00000136826	237.864	122.29	353.438	0.346	-1.53116	4.96383e-16	7.80336e-15
IRF4	ENSG00000137265	51.7902	101.947	1.63375	62.4002	5.96348	2.43693e-24	5.47419e-23
SMAD6	ENSG00000137834	202.236	118.273	286.2	0.413253	-1.2749	3.66846e-10	3.83938e-09
STAT4	ENSG00000138378	87.5637	174.525	0.602428	289.703	8.17843	1.77277e-54	8.63703e-53
IRF8	ENSG00000140968	2102.95	1089.31	3116.59	0.349522	-1.51655	2.21783e-50	1.00741e-48
GATA6	ENSG00000141448	20.7563	32.3943	9.11826	3.55269	1.82891	0.00172808	0.00810882
TBX19	ENSG00000143178	79.8862	113.926	45.8467	2.48493	1.31321	4.61506e-06	3.20582e-05
DLX1	ENSG00000144355	85.3759	45.6794	125.072	0.365224	-1.45315	7.96576e-07	6.04768e-06
HES6	ENSG00000144485	264.185	156.879	371.49	0.422298	-1.24367	4.691e-09	4.47791e-08
CSRNP1	ENSG00000144655	4023.41	7222.9	823.928	8.76642	3.13199	7.3302e-95	6.63669e-93
NFKBIZ	ENSG00000144802	998.336	1864.44	132.231	14.0999	3.81762	4.1605e-186	1.06849e-183
CREB5	ENSG00000146592	9.91262	17.4308	2.39443	7.27974	2.86389	0.00435944	0.0188134
NACC2	ENSG00000148411	1443.39	700.769	2186.01	0.32057	-1.64129	3.47848e-51	1.60184e-49
TCF7L2	ENSG00000148737	355.882	548.166	163.598	3.35069	1.74446	1.46194e-24	3.30906e-23
ARID5B	ENSG00000150347	492.155	837.605	146.704	5.70949	2.51336	1.25372e-64	7.4578e-63
BTBD11	ENSG00000151136	50.4016	70.9722	29.831	2.37914	1.25044	0.000351695	0.00187232
POU4F2	ENSG00000151615	53.7153	94.2994	13.1312	7.18135	2.84425	5.20423e-14	7.17974e-13
VENTX	ENSG00000151650	103.327	56.2387	150.416	0.373888	-1.41932	2.30378e-07	1.85392e-06
HHEX	ENSG00000152804	308.484	125.99	490.978	0.256611	-1.96234	1.28556e-29	3.41992e-28
ZNF117	ENSG00000152926	290.078	178.57	401.586	0.444661	-1.16922	5.13414e-06	3.54152e-05
NR4A2	ENSG00000153234	920.187	1665.74	174.631	9.53866	3.25379	9.0291e-140	1.43547e-137
CEBPG	ENSG00000153879	539.964	268.708	811.22	0.33124	-1.59405	8.34272e-31	2.29717e-29
KLF10	ENSG00000155090	688.729	1045.95	331.511	3.15509	1.65768	2.90284e-39	1.01349e-37
NRG1	ENSG00000157168	1282.42	2501.99	62.863	39.8006	5.31472	0	0
ETS2	ENSG00000157557	1962.37	3479.44	445.295	7.81379	2.96602	2.07985e-165	4.08461e-163
USF1	ENSG00000158773	2278.25	3417.45	1139.06	3.00024	1.58508	3.30085e-56	1.65098e-54
BTG2	ENSG00000159388	6354.47	10159.7	2549.26	3.98535	1.99471	2.59098e-104	2.67191e-102
ISL2	ENSG00000159556	70.0973	41.6192	98.5754	0.422207	-1.24398	8.98147e-05	0.000523883
NR2F6	ENSG00000160113	499.262	323.772	674.752	0.479839	-1.05938	7.28639e-14	9.95968e-13
GFI1	ENSG00000162676	2331.83	1309.46	3354.2	0.390395	-1.35699	2.41735e-42	9.15816e-41
ATF3	ENSG00000162772	3549.8	6843.6	256.001	26.7327	4.74054	0	0
REL	ENSG00000162924	643.191	1162.91	123.475	9.41819	3.23545	5.12366e-18	8.98541e-17
MSX1	ENSG00000163132	189.699	273.588	105.81	2.58565	1.37053	2.10359e-12	2.60598e-11
IFI16	ENSG00000163565	2175.35	3792.46	558.237	6.79363	2.76418	1.449e-35	4.58548e-34
HESX1	ENSG00000163666	362.046	703.838	20.2533	34.7518	5.11901	3.24106e-141	5.31077e-139
LZTFL1	ENSG00000163818	196.306	125.302	267.31	0.468754	-1.0931	4.58083e-08	3.96466e-07
KLF15	ENSG00000163884	16.6589	1.36291	31.9548	0.0426512	-4.55127	4.28899e-07	3.36036e-06
ZNF589	ENSG00000164048	78.2539	46.8846	109.623	0.427688	-1.22537	0.00420444	0.0181709
EBF1	ENSG00000164330	147.541	284.82	10.262	27.7549	4.79467	7.41246e-42	2.78452e-40
CREBRF	ENSG00000164463	296.01	394.931	197.09	2.00381	1.00275	7.68594e-10	7.83227e-09
HEY1	ENSG00000164683	41.2649	55.5068	27.023	2.05406	1.03848	0.00659698	0.0273183
HNF4G	ENSG00000164749	180.606	276.371	84.8418	3.25748	1.70376	1.36762e-16	2.23003e-15
NFIL3	ENSG00000165030	977.394	1341.6	613.188	2.18791	1.12955	2.57771e-17	4.35747e-16
ZNF367	ENSG00000165244	104.512	61.1448	147.878	0.41348	-1.27411	1.29938e-06	9.62429e-06
MESP1	ENSG00000166823	24.6411	8.4645	40.8177	0.207373	-2.2697	7.89432e-05	0.000464529
NKX3-1	ENSG00000167034	82.9162	133.035	32.7973	4.05628	2.02016	2.01692e-12	2.50092e-11
THAP11	ENSG00000168286	295.685	185.213	406.157	0.456015	-1.13285	4.95898e-11	5.54182e-10
IRF2	ENSG00000168310	2428.36	3912.32	944.396	4.14266	2.05056	3.47235e-92	3.05076e-90
STAT3	ENSG00000168610	6417.16	9107.94	3726.38	2.44418	1.28935	2.11397e-45	8.49053e-44
SHOX2	ENSG00000168779	1534.86	2364.13	705.589	3.35057	1.74441	3.89024e-59	2.06159e-57
ATF5	ENSG00000169136	8854.89	15355	2354.82	6.52066	2.70502	3.17029e-47	1.32928e-45
HIC2	ENSG00000169635	389.979	252.914	527.043	0.479874	-1.05927	4.91141e-12	5.94107e-11
FOS	ENSG00000170345	1621.79	2515.32	728.273	3.45381	1.78819	1.53584e-64	9.11572e-63
SMAD1	ENSG00000170365	100.552	160.394	40.7107	3.93985	1.97814	4.2001e-14	5.85493e-13
STAT2	ENSG00000170581	7088.37	12545.5	1631.26	7.69066	2.94311	2.33566e-211	7.60769e-209
JUNB	ENSG00000171223	4485.77	7405.4	1566.15	4.72841	2.24136	3.31708e-75	2.30119e-73
CEBPB	ENSG00000172216	4047.24	7002.84	1091.64	6.41497	2.68144	2.00223e-62	1.14268e-60
ARNT2	ENSG00000172379	144.951	199	90.9021	2.18917	1.13039	2.0749e-07	1.67884e-06
RELA	ENSG00000173039	2508.7	3413.61	1603.8	2.12846	1.08981	2.13812e-11	2.45517e-10
DMRT2	ENSG00000173253	81.3218	7.70416	154.939	0.0497237	-4.32992	1.72809e-27	4.28954e-26
INSM1	ENSG00000173404	8.15512	14.6765	1.63375	8.98329	3.16724	0.00130636	0.00627883
CTBP2	ENSG00000175029	400.616	242.112	559.12	0.433023	-1.20748	3.31293e-15	4.92404e-14
ETV4	ENSG00000175832	49.3408	13.9162	84.7654	0.164173	-2.60672	6.34087e-10	6.50378e-09
HIC1	ENSG00000177374	208.124	381.072	35.1765	10.8331	3.43738	2.84934e-58	1.48349e-56
IRX3	ENSG00000177508	1144.05	640.485	1647.62	0.388734	-1.36314	4.58073e-33	1.3579e-31
JUN	ENSG00000177606	1697.71	2609.31	786.102	3.3193	1.73088	2.68493e-60	1.46351e-58
SOX12	ENSG00000177732	595.786	233.36	958.211	0.243537	-2.03779	1.79357e-47	7.57981e-46
MSC	ENSG00000178860	1885.35	3482.68	288.022	12.0917	3.59595	7.13163e-222	2.6828e-219
FOXE1	ENSG00000178919	128.462	75.4202	181.503	0.415532	-1.26697	3.82246e-05	0.000235294
EGR3	ENSG00000179388	493.59	820.534	166.646	4.9238	2.29977	1.13525e-57	5.80868e-56
ZBTB42	ENSG00000179627	331.593	457.612	205.575	2.22601	1.15446	1.89696e-07	1.54328e-06
TSHZ1	ENSG00000179981	2127.93	693.494	3562.37	0.194672	-2.36088	9.93386e-112	1.15358e-109
BHLHE22	ENSG00000180828	64.3643	104.212	24.5162	4.25076	2.08772	4.81135e-06	3.33179e-05
ASCL2	ENSG00000183734	256.728	371.03	142.426	2.60507	1.38132	2.06013e-15	3.10344e-14
TBX1	ENSG00000184058	537.647	881.451	193.843	4.54724	2.18499	5.52983e-26	1.31053e-24
OLIG1	ENSG00000184221	873.325	1332.26	414.391	3.21498	1.68481	3.88323e-44	1.52525e-42
FOXD4L1	ENSG00000184492	11.8778	20.917	2.83861	7.36874	2.88142	0.00325824	0.0144196
MAFF	ENSG00000185022	781.467	1298.32	264.619	4.90635	2.29465	6.35657e-74	4.35327e-72
IRF7	ENSG00000185507	6078.31	10504.9	1651.76	6.35979	2.66898	5.4796e-123	7.24528e-121
ZNF267	ENSG00000185947	677.919	942.749	413.089	2.28219	1.19042	1.97191e-15	2.97727e-14
ZNF395	ENSG00000186918	96.5965	44.5028	148.69	0.299298	-1.74034	7.23164e-10	7.37776e-09
TEAD1	ENSG00000187079	555.254	919.065	191.443	4.80072	2.26325	1.22471e-58	6.45184e-57
HES4	ENSG00000188290	1038.04	1831.96	244.12	7.50434	2.90773	3.51347e-124	4.76352e-122
PLSCR1	ENSG00000188313	3481.25	6135.52	826.986	7.41913	2.89125	5.67881e-182	1.39152e-179
HMX3	ENSG00000188620	144.921	75.1332	214.708	0.349931	-1.51486	2.14294e-10	2.28852e-09
MTF1	ENSG00000188786	1236.6	1763.64	709.556	2.48555	1.31357	2.46714e-32	7.17028e-31
PAX5	ENSG00000196092	2447.77	4444.11	451.426	9.8446	3.29933	1.75689e-208	5.58627e-206
TCF4	ENSG00000196628	481.394	680.064	282.723	2.40541	1.26628	1.45063e-07	1.19694e-06
ZNF239	ENSG00000196793	13.6134	5.29388	21.9329	0.241367	-2.0507	0.00922247	0.0367646
ARID5A	ENSG00000196843	2294.12	3506.6	1081.63	3.24195	1.69686	1.45244e-63	8.43331e-62
ZNF84	ENSG00000198040	90.1413	59.2078	121.075	0.489018	-1.03204	0.00012459	0.000712411
RORB	ENSG00000198963	33.3759	63.612	3.13982	20.2598	4.34054	6.49382e-15	9.48296e-14
SOX18	ENSG00000203883	10.8307	2.88359	18.7778	0.153564	-2.70309	0.00324762	0.0143825
MAFB	ENSG00000204103	6934	12339.8	1528.16	8.07496	3.01346	3.65971e-116	4.48382e-114
DPF3	ENSG00000205683	146.326	86.4945	206.157	0.419557	-1.25306	1.3e-08	1.18992e-07
OLIG2	ENSG00000205927	1073.53	1721.91	425.149	4.05014	2.01797	4.67588e-68	2.90437e-66
MXD3	ENSG00000213347	129.957	60.5422	199.372	0.303665	-1.71945	2.68174e-12	3.29924e-11
ZBED1	ENSG00000214717	2172.56	3552.78	792.351	4.48385	2.16474	4.99422e-98	4.79823e-96
SP9	ENSG00000217236	335.179	470.767	199.591	2.35866	1.23797	2.25852e-07	1.81915e-06
CEBPD	ENSG00000221869	3713.91	5110.67	2317.16	2.20557	1.14115	7.55504e-34	2.27751e-32
CEBPA	ENSG00000245848	242.484	130.697	354.271	0.368918	-1.43863	1.00652e-12	1.28137e-11
