# Supplementary material for: Decoding the spatial chromatin organization and dynamic epigenetic landscapes of macrophage cells during differentiation and immune activation
Source: Nat Commun. 2022 Oct 4;13:5857. doi: 10.1038/s41467-022-33558-5 (PMC9532393; doi:10.1038/s41467-022-33558-5)
Supplement: Supplementary file 6 — Supplementary Dataset 3 [file 41467_2022_33558_MOESM6_ESM.xlsx]

## Sheet: Monocyte-Macrophage
Repress to Active				Repress to Bivalent				Bivalent to Active				Bivalent to Repress				Active to Bivalent				Active to Repress
ENSG00000002822	MAD1L1			ENSG00000082014	SMARCD3			ENSG00000006459	KDM7A			ENSG00000002745	WNT16			ENSG00000001084	GCLC			ENSG00000001617	SEMA3F
ENSG00000003400	CASP10			ENSG00000100600	LGMN			ENSG00000008405	CRY1			ENSG00000004948	CALCR			ENSG00000002746	HECW1			ENSG00000005801	ZNF195
ENSG00000004660	CAMKK1			ENSG00000104972	LILRB1			ENSG00000013588	GPRC5A			ENSG00000005513	SOX8			ENSG00000003137	CYP26B1			ENSG00000006611	USH1C
ENSG00000004777	ARHGAP33			ENSG00000104974	LILRA1			ENSG00000016082	ISL1			ENSG00000006071	ABCC8			ENSG00000004399	PLXND1			ENSG00000007047	MARK4
ENSG00000005801	ZNF195			ENSG00000106689	LHX2			ENSG00000036448	MYOM2			ENSG00000053524	MCF2L2			ENSG00000004455	AK2			ENSG00000007129	CEACAM21
ENSG00000006194	ZNF263			ENSG00000106772	PRUNE2			ENSG00000059377	TBXAS1			ENSG00000069188	SDK2			ENSG00000006740	ARHGAP44			ENSG00000007402	CACNA2D2
ENSG00000006625	GGCT			ENSG00000110881	ASIC1			ENSG00000064393	HIPK2			ENSG00000069667	RORA			ENSG00000010626	LRRC23			ENSG00000008056	SYN1
ENSG00000006747	SCIN			ENSG00000113430	IRX4			ENSG00000065559	MAP2K4			ENSG00000070748	CHAT			ENSG00000017373	SRCIN1			ENSG00000010704	HFE
ENSG00000007080	CCDC124			ENSG00000115138	POMC			ENSG00000069020	MAST4			ENSG00000072422	RHOBTB1			ENSG00000035664	DAPK2			ENSG00000012061	ERCC1
ENSG00000007237	GAS7			ENSG00000117115	PADI2			ENSG00000077264	PAK3			ENSG00000074317	SNCB			ENSG00000038382	TRIO			ENSG00000013725	CD6
ENSG00000007541	PIGQ			ENSG00000120915	EPHX2			ENSG00000079215	SLC1A3			ENSG00000077942	FBLN1			ENSG00000047365	ARAP2			ENSG00000027075	PRKCH
ENSG00000008018	PSMB1			ENSG00000121905	HPCA			ENSG00000080493	SLC4A4			ENSG00000080845	DLGAP4			ENSG00000047634	SCML1			ENSG00000042062	FAM65C
ENSG00000008513	ST3GAL1			ENSG00000124615	MOCS1			ENSG00000081052	COL4A4			ENSG00000082458	DLG3			ENSG00000054356	PTPRN			ENSG00000062822	POLD1
ENSG00000010278	CD9			ENSG00000125084	WNT1			ENSG00000082397	EPB41L3			ENSG00000085276	MECOM			ENSG00000054654	SYNE2			ENSG00000067191	CACNB1
ENSG00000010310	GIPR			ENSG00000129990	SYT5			ENSG00000085063	CD59			ENSG00000090932	DLL3			ENSG00000055163	CYFIP2			ENSG00000070087	PFN2
ENSG00000010361	FUZ			ENSG00000131037	EPS8L1			ENSG00000088808	PPP1R13B			ENSG00000100604	CHGA			ENSG00000060656	PTPRU			ENSG00000072041	SLC6A15
ENSG00000012061	ERCC1			ENSG00000131042	LILRB2			ENSG00000091409	ITGA6			ENSG00000101200	AVP			ENSG00000061337	LZTS1			ENSG00000072062	PRKACA
ENSG00000013441	CLK1			ENSG00000134668	SPOCD1			ENSG00000092068	SLC7A8			ENSG00000101438	SLC32A1			ENSG00000063660	GPC1			ENSG00000074660	SCARF1
ENSG00000013810	TACC3			ENSG00000134853	PDGFRA			ENSG00000100987	VSX1			ENSG00000103034	NDRG4			ENSG00000064218	DMRT3			ENSG00000075073	TACR2
ENSG00000014257	ACPP			ENSG00000141540	TTYH2			ENSG00000101349	PAK7			ENSG00000103227	LMF1			ENSG00000065989	PDE4A			ENSG00000076067	RBMS2
ENSG00000014914	MTMR11			ENSG00000144476	ACKR3			ENSG00000102924	CBLN1			ENSG00000103546	SLC6A2			ENSG00000066032	CTNNA2			ENSG00000077150	NFKB2
ENSG00000023902	PLEKHO1			ENSG00000147571	CRH			ENSG00000103811	CTSH			ENSG00000104059	FAM189A1			ENSG00000066923	STAG3			ENSG00000077984	CST7
ENSG00000033100	CHPF2			ENSG00000147596	PRDM14			ENSG00000105352	CEACAM4			ENSG00000104067	TJP1			ENSG00000067141	NEO1			ENSG00000086159	AQP6
ENSG00000038274	MAT2B			ENSG00000159708	LRRC36			ENSG00000105928	DFNA5			ENSG00000105427	CNFN			ENSG00000067606	PRKCZ			ENSG00000088826	SMOX
ENSG00000047249	ATP6V1H			ENSG00000160439	RDH13			ENSG00000106278	PTPRZ1			ENSG00000107831	FGF8			ENSG00000068078	FGFR3			ENSG00000092931	MFSD11
ENSG00000047648	ARHGAP6			ENSG00000160716	CHRNB2			ENSG00000109686	SH3D19			ENSG00000109255	NMU			ENSG00000068781	STON1-GTF2A1L			ENSG00000099957	P2RX6
ENSG00000051523	CYBA			ENSG00000161270	NPHS1			ENSG00000111490	TBC1D30			ENSG00000109794	FAM149A			ENSG00000070404	FSTL3			ENSG00000101265	RASSF2
ENSG00000056097	ZFR			ENSG00000161905	ALOX15			ENSG00000112137	PHACTR1			ENSG00000109956	B3GAT1			ENSG00000070614	NDST1			ENSG00000101444	AHCY
ENSG00000059122	FLYWCH1			ENSG00000163032	VSNL1			ENSG00000115468	EFHD1			ENSG00000110076	NRXN2			ENSG00000070731	ST6GALNAC2			ENSG00000103742	IGDCC4
ENSG00000059728	MXD1			ENSG00000163497	FEV			ENSG00000117598	LPPR5			ENSG00000110148	CCKBR			ENSG00000073861	TBX21			ENSG00000104881	PPP1R13L
ENSG00000063244	U2AF2			ENSG00000164151	KIAA0947			ENSG00000118257	NRP2			ENSG00000111783	RFX4			ENSG00000074416	MGLL			ENSG00000104883	PEX11G
ENSG00000064201	TSPAN32			ENSG00000166793	YPEL4			ENSG00000119401	TRIM32			ENSG00000112796	ENPP5			ENSG00000076826	CAMSAP3			ENSG00000105289	TJP3
ENSG00000064225	ST3GAL6			ENSG00000167414	GNG8			ENSG00000122735	DNAI1			ENSG00000113657	DPYSL3			ENSG00000076864	RAP1GAP			ENSG00000105357	MYH14
ENSG00000064607	SUGP2			ENSG00000167749	KLK4			ENSG00000123576	ESX1			ENSG00000113946	CLDN16			ENSG00000077585	GPR137B			ENSG00000105550	FGF21
ENSG00000064666	CNN2			ENSG00000167992	VWCE			ENSG00000128040	SPINK2			ENSG00000117322	CR2			ENSG00000078081	LAMP3			ENSG00000105738	SIPA1L3
ENSG00000064763	FAR2			ENSG00000168280	KIF5C			ENSG00000129514	FOXA1			ENSG00000117707	PROX1			ENSG00000078401	EDN1			ENSG00000105808	RASA4
ENSG00000064886	CHI3L2			ENSG00000168309	FAM107A			ENSG00000129682	FGF13			ENSG00000118160	SLC8A2			ENSG00000079931	MOXD1			ENSG00000105877	DNAH11
ENSG00000064932	SBNO2			ENSG00000168676	KCTD19			ENSG00000133019	CHRM3			ENSG00000118526	TCF21			ENSG00000080572	PIH1D3			ENSG00000106078	COBL
ENSG00000065054	SLC9A3R2			ENSG00000169418	NPR1			ENSG00000133083	DCLK1			ENSG00000119125	GDA			ENSG00000082014	SMARCD3			ENSG00000106327	TFR2
ENSG00000066382	MPPED2			ENSG00000172409	CLP1			ENSG00000133805	AMPD3			ENSG00000119508	NR4A3			ENSG00000082175	PGR			ENSG00000106540	AC004837.3
ENSG00000066923	STAG3			ENSG00000173302	GPR148			ENSG00000133878	DUSP26			ENSG00000121904	CSMD2			ENSG00000082438	COBLL1			ENSG00000107566	ERLIN1
ENSG00000067082	KLF6			ENSG00000173673	HES3			ENSG00000134363	FST			ENSG00000124143	ARHGAP40			ENSG00000082684	SEMA5B			ENSG00000110077	MS4A6A
ENSG00000067191	CACNB1			ENSG00000177468	OLIG3			ENSG00000134716	CYP2J2			ENSG00000126217	MCF2L			ENSG00000085741	WNT11			ENSG00000110492	MDK
ENSG00000068323	TFE3			ENSG00000181045	SLC26A11			ENSG00000135108	FBXO21			ENSG00000126878	AIF1L			ENSG00000088256	GNA11			ENSG00000110876	SELPLG
ENSG00000068971	PPP2R5B			ENSG00000181523	SGSH			ENSG00000135390	ATP5G2			ENSG00000127585	FBXL16			ENSG00000088367	EPB41L1			ENSG00000111788	RP11-22B23.1
ENSG00000069399	BCL3			ENSG00000183405	RPS7P1			ENSG00000136114	THSD1			ENSG00000130294	KIF1A			ENSG00000088387	DOCK9			ENSG00000111834	RSPH4A
ENSG00000069702	TGFBR3			ENSG00000184792	OSBP2			ENSG00000137819	PAQR5			ENSG00000130643	CALY			ENSG00000088881	EBF4			ENSG00000111846	GCNT2
ENSG00000071553	ATP6AP1			ENSG00000188910	GJB3			ENSG00000138311	ZNF365			ENSG00000130700	GATA5			ENSG00000088882	CPXM1			ENSG00000112701	SENP6
ENSG00000071626	DAZAP1			ENSG00000197093	GAL3ST4			ENSG00000138670	RASGEF1B			ENSG00000130711	PRDM12			ENSG00000091592	NLRP1			ENSG00000112706	IMPG1
ENSG00000072786	STK10			ENSG00000203710	CR1			ENSG00000138678	AGPAT9			ENSG00000135373	EHF			ENSG00000092421	SEMA6A			ENSG00000113742	CPEB4
ENSG00000073331	ALPK1			ENSG00000204393	RP11-410N8.4			ENSG00000139352	ASCL1			ENSG00000135903	PAX3			ENSG00000092969	TGFB2			ENSG00000114316	USP4
ENSG00000074181	NOTCH3			ENSG00000204909	SPINK9			ENSG00000139865	TTC6			ENSG00000136002	ARHGEF4			ENSG00000095397	DFNB31			ENSG00000115423	DNAH6
ENSG00000074219	TEAD2			ENSG00000207805	MIR483			ENSG00000141391	SLMO1			ENSG00000136574	GATA4			ENSG00000095596	CYP26A1			ENSG00000116661	FBXO2
ENSG00000074964	ARHGEF10L			ENSG00000211517	MIR671			ENSG00000143367	TUFT1			ENSG00000138696	BMPR1B			ENSG00000099139	PCSK5			ENSG00000116675	DNAJC6
ENSG00000075420	FNDC3B			ENSG00000213626	LBH			ENSG00000144560	VGLL4			ENSG00000140557	ST8SIA2			ENSG00000099256	PRTFDC1			ENSG00000117791	MARC2
ENSG00000075884	ARHGAP15			ENSG00000225156	AC012354.6			ENSG00000144619	CNTN4			ENSG00000140835	CHST4			ENSG00000099617	EFNA2			ENSG00000118513	MYB
ENSG00000076604	TRAF4			ENSG00000226508	AC104655.3			ENSG00000145075	CCDC39			ENSG00000141433	ADCYAP1			ENSG00000099822	HCN2			ENSG00000118946	PCDH17
ENSG00000076944	STXBP2			ENSG00000227308	AC009502.4			ENSG00000146267	FAXC			ENSG00000142611	PRDM16			ENSG00000099889	ARVCF			ENSG00000119772	DNMT3A
ENSG00000077150	NFKB2			ENSG00000231802	AC009502.1			ENSG00000146411	SLC2A12			ENSG00000142698	C1orf94			ENSG00000099953	MMP11			ENSG00000120322	PCDHB8
ENSG00000078142	PIK3C3			ENSG00000235024	AC097468.7			ENSG00000148143	ZNF462			ENSG00000143858	SYT2			ENSG00000100276	RASL10A			ENSG00000120868	APAF1
ENSG00000079393	DUSP13			ENSG00000249116	CTD-2194D22.3			ENSG00000148219	ASTN2			ENSG00000144406	UNC80			ENSG00000100285	NEFH			ENSG00000121207	LRAT
ENSG00000080503	SMARCA2			ENSG00000253230	LINC00599			ENSG00000150628	SPATA4			ENSG00000145708	CRHBP			ENSG00000100593	ISM2			ENSG00000121316	PLBD1
ENSG00000082074	FYB			ENSG00000254602	AP000662.4			ENSG00000150938	CRIM1			ENSG00000145832	SLC25A48			ENSG00000100599	RIN3			ENSG00000121361	KCNJ8
ENSG00000082458	DLG3			ENSG00000257389	RP11-153F5.3			ENSG00000151276	MAGI1			ENSG00000146122	DAAM2			ENSG00000101098	RIMS4			ENSG00000121807	CCR2
ENSG00000082641	NFE2L1			ENSG00000260411	RP11-420N3.2			ENSG00000152932	RAB3C			ENSG00000147402	GABRQ			ENSG00000101331	CCM2L			ENSG00000125531	C20orf195
ENSG00000083457	ITGAE			ENSG00000264703	MIR4752			ENSG00000154122	ANKH			ENSG00000151322	NPAS3			ENSG00000101871	MID1			ENSG00000128052	KDR
ENSG00000084093	REST			ENSG00000264799	AC009892.1			ENSG00000154655	L3MBTL4			ENSG00000152268	SPON1			ENSG00000102038	SMARCA1			ENSG00000128602	SMO
ENSG00000087266	SH3BP2			ENSG00000265466	AL583842.2			ENSG00000154678	PDE1C			ENSG00000154096	THY1			ENSG00000102935	ZNF423			ENSG00000128655	PDE11A
ENSG00000087589	CASS4			ENSG00000272442	RP11-444E17.6			ENSG00000154721	JAM2			ENSG00000154764	WNT7A			ENSG00000103196	CRISPLD2			ENSG00000128951	DUT
ENSG00000088038	CNOT3			ENSG00000272661	RP4-548D19.3			ENSG00000154917	RAB6B			ENSG00000156453	PCDH1			ENSG00000103227	LMF1			ENSG00000129667	RHBDF2
ENSG00000089127	OAS1							ENSG00000156011	PSD3			ENSG00000159167	STC1			ENSG00000103534	TMC5			ENSG00000130818	ZNF426
ENSG00000089157	RPLP0							ENSG00000156299	TIAM1			ENSG00000160882	CYP11B1			ENSG00000103647	CORO2B			ENSG00000130829	DUSP9
ENSG00000089820	ARHGAP4							ENSG00000157429	ZNF19			ENSG00000162458	FBLIM1			ENSG00000104044	OCA2			ENSG00000131196	NFATC1
ENSG00000090104	RGS1							ENSG00000158528	PPP1R9A			ENSG00000163347	CLDN1			ENSG00000104290	FZD3			ENSG00000131401	NAPSB
ENSG00000090372	STRN4							ENSG00000158966	CACHD1			ENSG00000164690	SHH			ENSG00000104835	SARS2			ENSG00000132872	SYT4
ENSG00000090621	PABPC4							ENSG00000163060	TEKT4			ENSG00000165072	MAMDC2			ENSG00000104936	DMPK			ENSG00000135093	USP30
ENSG00000090659	CD209							ENSG00000163064	EN1			ENSG00000165548	TMEM63C			ENSG00000105048	TNNT1			ENSG00000135298	BAI3
ENSG00000092094	OSGEP							ENSG00000163638	ADAMTS9			ENSG00000166105	GLB1L3			ENSG00000105186	ANKRD27			ENSG00000135898	GPR55
ENSG00000092199	HNRNPC							ENSG00000164089	ETNPPL			ENSG00000167617	CDC42EP5			ENSG00000105401	CDC37			ENSG00000135925	WNT10A
ENSG00000092200	RPGRIP1							ENSG00000164093	PITX2			ENSG00000169862	CTNND2			ENSG00000105409	ATP1A3			ENSG00000136383	ALPK3
ENSG00000092607	TBX15							ENSG00000164171	ITGA2			ENSG00000170703	TTLL6			ENSG00000105438	KDELR1			ENSG00000138606	SHF
ENSG00000092929	UNC13D							ENSG00000164466	SFXN1			ENSG00000171303	KCNK3			ENSG00000105855	ITGB8			ENSG00000140995	DEF8
ENSG00000095066	HOOK2							ENSG00000164542	KIAA0895			ENSG00000171435	KSR2			ENSG00000105974	CAV1			ENSG00000141568	FOXK2
ENSG00000095303	PTGS1							ENSG00000164970	FAM219A			ENSG00000173917	HOXB2			ENSG00000105976	MET			ENSG00000142539	CTD-2545M3.6
ENSG00000095794	CREM							ENSG00000165617	DACT1			ENSG00000173918	C1QTNF1			ENSG00000106123	EPHB6			ENSG00000142864	SERBP1
ENSG00000099219	ERMP1							ENSG00000167377	ZNF23			ENSG00000175766	EIF4E1B			ENSG00000107438	PDLIM1			ENSG00000143190	POU2F1
ENSG00000099338	CATSPERG							ENSG00000168398	BDKRB2			ENSG00000175911	AC127496.1			ENSG00000107562	CXCL12			ENSG00000144152	FBLN7
ENSG00000099377	HSD3B7							ENSG00000168772	CXXC4			ENSG00000177133	LINC00982			ENSG00000107736	CDH23			ENSG00000144218	AFF3
ENSG00000099625	C19orf26							ENSG00000168785	TSPAN5			ENSG00000177551	NHLH2			ENSG00000107807	TLX1			ENSG00000144712	CAND2
ENSG00000099804	CDC34							ENSG00000168807	SNTB2			ENSG00000177679	SRRM3			ENSG00000107859	PITX3			ENSG00000144815	NXPE3
ENSG00000099817	POLR2E							ENSG00000168917	SLC35G2			ENSG00000178171	AMER3			ENSG00000108270	AATF			ENSG00000145287	PLAC8
ENSG00000099875	MKNK2							ENSG00000169031	COL4A3			ENSG00000180150	HMGN2P9			ENSG00000108370	RGS9			ENSG00000145391	SETD7
ENSG00000099949	LZTR1							ENSG00000169330	KIAA1024			ENSG00000180287	PLD5			ENSG00000109339	MAPK10			ENSG00000146216	TTBK1
ENSG00000100092	SH3BP1							ENSG00000169432	SCN9A			ENSG00000180818	HOXC10			ENSG00000109762	SNX25			ENSG00000146250	PRSS35
ENSG00000100099	HPS4							ENSG00000170471	RALGAPB			ENSG00000182645	CCDC172			ENSG00000110400	PVRL1			ENSG00000146592	CREB5
ENSG00000100242	SUN2							ENSG00000170629	DPY19L2P2			ENSG00000182667	NTM			ENSG00000110881	ASIC1			ENSG00000147246	HTR2C
ENSG00000100243	CYB5R3							ENSG00000170915	PAQR8			ENSG00000183379	SYNDIG1L			ENSG00000111087	GLI1			ENSG00000147403	RPL10
ENSG00000100266	PACSIN2							ENSG00000171759	PAH			ENSG00000184608	C8orf12			ENSG00000111186	WNT5B			ENSG00000147526	TACC1
ENSG00000100299	ARSA							ENSG00000172458	IL17D			ENSG00000184792	OSBP2			ENSG00000111249	CUX2			ENSG00000148180	GSN
ENSG00000100307	CBX7							ENSG00000172915	NBEA			ENSG00000184985	SORCS2			ENSG00000111481	COPZ1			ENSG00000148832	PAOX
ENSG00000100354	TNRC6B							ENSG00000173166	RAPH1			ENSG00000185046	ANKS1B			ENSG00000111490	TBC1D30			ENSG00000149516	MS4A3
ENSG00000100490	CDKL1							ENSG00000173276	ZBTB21			ENSG00000185053	SGCZ			ENSG00000111674	ENO2			ENSG00000150672	DLG2
ENSG00000100523	DDHD1							ENSG00000174808	BTC			ENSG00000186469	GNG2			ENSG00000111799	COL12A1			ENSG00000151914	DST
ENSG00000100628	ASB2							ENSG00000175497	DPP10			ENSG00000186642	PDE2A			ENSG00000112297	AIM1			ENSG00000154080	CHST9
ENSG00000100997	ABHD12							ENSG00000175893	ZDHHC21			ENSG00000187147	RNF220			ENSG00000112394	SLC16A10			ENSG00000155926	SLA
ENSG00000101040	ZMYND8							ENSG00000177519	RPRM			ENSG00000187730	GABRD			ENSG00000112541	PDE10A			ENSG00000157110	RBPMS
ENSG00000101247	NDUFAF5							ENSG00000178538	CA8			ENSG00000188338	SLC38A3			ENSG00000112584	FAM120B			ENSG00000157613	CREB3L1
ENSG00000101665	SMAD7							ENSG00000179344	HLA-DQB1			ENSG00000188536	HBA2			ENSG00000112655	PTK7			ENSG00000157933	SKI
ENSG00000102225	CDK16							ENSG00000180660	MAB21L1			ENSG00000189129	PLAC9			ENSG00000112699	GMDS			ENSG00000158856	DMTN
ENSG00000102760	RGCC							ENSG00000181195	PENK			ENSG00000189292	FAM150B			ENSG00000112964	GHR			ENSG00000159842	ABR
ENSG00000103066	PLA2G15							ENSG00000181350	FAM211A			ENSG00000196660	SLC30A10			ENSG00000113389	NPR3			ENSG00000161149	TUBA3FP
ENSG00000103222	ABCC1							ENSG00000181656	GPR88			ENSG00000198732	SMOC1			ENSG00000114353	GNAI2			ENSG00000161642	ZNF385A
ENSG00000103257	SLC7A5							ENSG00000183722	LHFP			ENSG00000199015	MIR377			ENSG00000114646	CSPG5			ENSG00000161835	GRASP
ENSG00000103507	BCKDK							ENSG00000183780	SLC35F3			ENSG00000201155	RNU1-24P			ENSG00000115041	KCNIP3			ENSG00000162992	NEUROD1
ENSG00000103522	IL21R							ENSG00000185044	RP11-435B5.4			ENSG00000203280	CTA-221G9.11			ENSG00000115306	SPTBN1			ENSG00000163803	PLB1
ENSG00000103549	RNF40							ENSG00000185532	PRKG1			ENSG00000204241	RP11-713P17.3			ENSG00000116032	GRIN3B			ENSG00000163993	S100P
ENSG00000103653	CSK							ENSG00000187079	TEAD1			ENSG00000204381	LAYN			ENSG00000116128	BCL9			ENSG00000164764	SBSPON
ENSG00000103876	FAH							ENSG00000188820	FAM26F			ENSG00000207802	MIR646			ENSG00000116580	GON4L			ENSG00000164796	CSMD3
ENSG00000104055	TGM5							ENSG00000196167	COLCA1			ENSG00000207961	MIR496			ENSG00000116729	WLS			ENSG00000164904	ALDH7A1
ENSG00000104081	BMF							ENSG00000196914	ARHGEF12			ENSG00000207978	MIR154			ENSG00000116990	MYCL			ENSG00000165066	NKX6-3
ENSG00000104522	TSTA3							ENSG00000197261	C6orf141			ENSG00000214336	FOXI3			ENSG00000117013	KCNQ4			ENSG00000165507	C10orf10
ENSG00000104714	ERICH1							ENSG00000197748	WDR96			ENSG00000215045	GRID2IP			ENSG00000117298	ECE1			ENSG00000165905	GYLTL1B
ENSG00000104783	KCNN4							ENSG00000202229	RNU6-1138P			ENSG00000215644	GCGR			ENSG00000117519	CNN3			ENSG00000166111	SVOP
ENSG00000104946	TBC1D17							ENSG00000204950	LRRC10B			ENSG00000215802	RFKP1			ENSG00000118246	FASTKD2			ENSG00000166342	NETO1
ENSG00000105127	AKAP8							ENSG00000214290	COLCA2			ENSG00000221961	PRR21			ENSG00000118804	FAM47E-STBD1			ENSG00000166482	MFAP4
ENSG00000105146	AURKC							ENSG00000215374	FAM66B			ENSG00000224486	HCG19P			ENSG00000119139	TJP2			ENSG00000166664	CHRFAM7A
ENSG00000105364	MRPL4							ENSG00000225554	RP11-527D7.1			ENSG00000224957	AC090044.1			ENSG00000119508	NR4A3			ENSG00000166816	LDHD
ENSG00000105374	NKG7							ENSG00000226031	FGF13-AS1			ENSG00000225106	RP11-429E11.2			ENSG00000119514	GALNT12			ENSG00000167157	PRRX2
ENSG00000105397	TYK2							ENSG00000226963	AC078883.4			ENSG00000225472	RP11-120J1.1			ENSG00000120088	CRHR1			ENSG00000167601	AXL
ENSG00000105402	NAPA							ENSG00000229204	PTGES3P3			ENSG00000225930	AC026150.5			ENSG00000120658	ENOX1			ENSG00000167642	SPINT2
ENSG00000105443	CYTH2							ENSG00000229743	LINC01159			ENSG00000226091	LINC00937			ENSG00000120659	TNFSF11			ENSG00000167723	TRPV3
ENSG00000105492	SIGLEC6							ENSG00000230992	FAM201B			ENSG00000226510	UPK1A-AS1			ENSG00000120832	MTERFD3			ENSG00000168214	RBPJ
ENSG00000105497	ZNF175							ENSG00000231162	COX11P1			ENSG00000226828	RP11-278H7.1			ENSG00000120833	SOCS2			ENSG00000170458	CD14
ENSG00000105501	SIGLEC5							ENSG00000232536	RP11-74C1.4			ENSG00000227169	RP1-37J18.1			ENSG00000120913	PDLIM2			ENSG00000170579	DLGAP1
ENSG00000105520	DKFZP761J1410							ENSG00000232825	RP5-896L10.1			ENSG00000227888	FAM66A			ENSG00000121454	LHX4			ENSG00000171680	PLEKHG5
ENSG00000105556	MIER2							ENSG00000233087	AC073869.1			ENSG00000227954	RP3-323P13.2			ENSG00000121753	BAI2			ENSG00000171681	ATF7IP
ENSG00000105559	PLEKHA4							ENSG00000235026	DPP10-AS1			ENSG00000228643	AC079779.4			ENSG00000122824	NUDT10			ENSG00000171777	RASGRP4
ENSG00000105576	TNPO2							ENSG00000236206	RP11-306I1.2			ENSG00000229797	AC140481.8			ENSG00000123405	NFE2			ENSG00000171794	UTF1
ENSG00000105618	PRPF31							ENSG00000237232	ZNF295-AS1			ENSG00000230148	HOXB-AS1			ENSG00000123836	PFKFB2			ENSG00000172238	ATOH1
ENSG00000105726	ATP13A1							ENSG00000241185	RPL21P122			ENSG00000230450	NEK2P4			ENSG00000124249	KCNK15			ENSG00000172382	PRSS27
ENSG00000105875	WDR91							ENSG00000241684	ADAMTS9-AS2			ENSG00000233516	RP11-388N2.1			ENSG00000124493	GRM4			ENSG00000172828	CES3
ENSG00000105967	TFEC							ENSG00000243187	CCDC39-AS1			ENSG00000234929	AC018685.1			ENSG00000124593	PRICKLE4			ENSG00000173295	FAM86B3P
ENSG00000105993	DNAJB6							ENSG00000243319	FGF14-IT1			ENSG00000235280	MCF2L-AS1			ENSG00000124785	NRN1			ENSG00000173535	TNFRSF10C
ENSG00000106397	PLOD3							ENSG00000244158	RP1-93H18.6			ENSG00000237402	CAMTA1-IT1			ENSG00000125266	EFNB2			ENSG00000174776	WDR49
ENSG00000106560	GIMAP2							ENSG00000244588	RAD21L1			ENSG00000237578	RP11-174M13.1			ENSG00000125285	SOX21			ENSG00000174951	FUT1
ENSG00000106591	MRPL32							ENSG00000247324	RP11-510M2.2			ENSG00000237624	OXCT2P1			ENSG00000125378	BMP4			ENSG00000175356	SCUBE2
ENSG00000106683	LIMK1							ENSG00000249899	CTD-2175A23.1			ENSG00000238262	NTM-IT			ENSG00000125384	PTGER2			ENSG00000175920	DOK7
ENSG00000106992	AK1							ENSG00000250046	RP11-148B6.2			ENSG00000240247	DEFA1B			ENSG00000125510	OPRL1			ENSG00000176155	CCDC57
ENSG00000107263	RAPGEF1							ENSG00000254254	RP11-17A4.2			ENSG00000249599	RP11-168E14.1			ENSG00000125816	NKX2-4			ENSG00000177570	SAMD12
ENSG00000108219	TSPAN14							ENSG00000257548	RP11-797M17.1			ENSG00000249844	OR7E43P			ENSG00000125850	OVOL2			ENSG00000178226	PRSS36
ENSG00000108669	CYTH1							ENSG00000258072	RP11-554D14.2			ENSG00000251151	HOXC-AS3			ENSG00000126259	KIRREL2			ENSG00000179008	C14orf39
ENSG00000108819	PPP1R9B							ENSG00000258691	RP11-404P21.8			ENSG00000253649	PRSS51			ENSG00000126603	GLIS2			ENSG00000179222	MAGED1
ENSG00000108839	ALOX12							ENSG00000258735	LINC00637			ENSG00000254046	IGHV1-17			ENSG00000126822	PLEKHG3			ENSG00000180815	MAP3K15
ENSG00000109452	INPP4B							ENSG00000259207	ITGB3			ENSG00000254215	IGHVIII-11-1			ENSG00000127580	WDR24			ENSG00000181577	C6orf223
ENSG00000110031	LPXN							ENSG00000259663	CTD-2314G24.2			ENSG00000257829	RP11-845M18.6			ENSG00000127990	SGCE			ENSG00000182048	TRPC2
ENSG00000110047	EHD1							ENSG00000259753	ITGB3			ENSG00000258131	RP11-541G9.1			ENSG00000128271	ADORA2A			ENSG00000182107	TMEM30B
ENSG00000110324	IL10RA							ENSG00000260025	RP11-490M8.1			ENSG00000258979	RP11-433J8.2			ENSG00000128342	LIF			ENSG00000182132	KCNIP1
ENSG00000110651	CD81							ENSG00000260231	JHDM1D-AS1			ENSG00000259888	CTD-2540M10.1			ENSG00000128917	DLL4			ENSG00000182368	FAM27A
ENSG00000110719	TCIRG1							ENSG00000260584	RP11-1166P10.7			ENSG00000260548	RP6-24A23.6			ENSG00000129535	NRL			ENSG00000182489	XKRX
ENSG00000111011	RSRC2							ENSG00000260641	RP11-1299A16.3			ENSG00000260807	RP11-161M6.2			ENSG00000129682	FGF13			ENSG00000183486	MX2
ENSG00000111181	SLC6A12							ENSG00000261634	RP11-352D13.6			ENSG00000261196	CYP4A43P			ENSG00000130720	FIBCD1			ENSG00000183807	FAM162B
ENSG00000111452	GPR133							ENSG00000265710	AL161772.1			ENSG00000265096	C1QTNF1-AS1			ENSG00000130829	DUSP9			ENSG00000184515	BEX5
ENSG00000111642	CHD4							ENSG00000266006	MIR4488			ENSG00000265179	RP11-672L10.2			ENSG00000131015	ULBP2			ENSG00000185133	INPP5J
ENSG00000111859	NEDD9							ENSG00000267195	MIR212			ENSG00000265671	RP11-672L10.3			ENSG00000131094	C1QL1			ENSG00000185155	MIXL1
ENSG00000112561	TFEB							ENSG00000267200	MIR132			ENSG00000266329	MIR4281			ENSG00000131187	F12			ENSG00000185482	STAC3
ENSG00000112759	SLC29A1							ENSG00000268657	AL133373.1			ENSG00000267279	RP11-879F14.2			ENSG00000131188	PRR7			ENSG00000185551	NR2F2
ENSG00000113070	HBEGF							ENSG00000271727	RP11-532F6.4			ENSG00000267568	RP11-87G24.3			ENSG00000131650	KREMEN2			ENSG00000185920	PTCH1
ENSG00000113262	GRM6							ENSG00000272057	CTB-40H15.4			ENSG00000269047	AC009041.2			ENSG00000132429	POPDC3			ENSG00000187017	ESPN
ENSG00000114353	GNAI2							ENSG00000272143	FGF14-AS2			ENSG00000270235	RP11-122K13.14			ENSG00000132718	SYT11			ENSG00000188013	MEIS3P2
ENSG00000114859	CLCN2							ENSG00000272463	RP11-532F6.3			ENSG00000272050	RP13-379O24.3			ENSG00000133124	IRS4			ENSG00000188157	AGRN
ENSG00000114867	EIF4G1											ENSG00000272763	RP11-357H14.17			ENSG00000134198	TSPAN2			ENSG00000188315	C3orf62
ENSG00000115165	CYTIP											ENSG00000273049	RP11-834C11.12			ENSG00000134202	GSTM3			ENSG00000188452	CERKL
ENSG00000115310	RTN4															ENSG00000134243	SORT1			ENSG00000188778	ADRB3
ENSG00000116017	ARID3A															ENSG00000134245	WNT2B			ENSG00000189014	FAM35DP
ENSG00000116251	RPL22															ENSG00000134247	PTGFRN			ENSG00000189091	SF3B3
ENSG00000116584	ARHGEF2															ENSG00000134504	KCTD1			ENSG00000196189	SEMA4A
ENSG00000116670	MAD2L2															ENSG00000134775	FHOD3			ENSG00000196209	SIRPB2
ENSG00000117009	KMO															ENSG00000135063	FAM189A2			ENSG00000196415	PRTN3
ENSG00000117676	RPS6KA1															ENSG00000135312	HTR1B			ENSG00000196498	NCOR2
ENSG00000118492	ADGB															ENSG00000135362	PRR5L			ENSG00000196557	CACNA1H
ENSG00000118733	OLFM3															ENSG00000135519	KCNH3			ENSG00000197054	ZNF763
ENSG00000119185	ITGB1BP1															ENSG00000135547	HEY2			ENSG00000197627	UBE2Q2P12
ENSG00000119321	FKBP15															ENSG00000135622	SEMA4F			ENSG00000197769	MAP1LC3C
ENSG00000119397	CNTRL															ENSG00000135625	EGR4			ENSG00000198723	C19orf45
ENSG00000119408	NEK6															ENSG00000135723	FHOD1			ENSG00000200496	U8
ENSG00000119487	MAPKAP1															ENSG00000135740	SLC9A5			ENSG00000203606	AC004832.1
ENSG00000119714	GPR68															ENSG00000135916	ITM2C			ENSG00000204472	AIF1
ENSG00000119777	TMEM214															ENSG00000136026	CKAP4			ENSG00000207005	RNU1-2
ENSG00000119900	OGFRL1															ENSG00000136111	TBC1D4			ENSG00000207581	MIR199B
ENSG00000119917	IFIT3															ENSG00000136848	DAB2IP			ENSG00000207922	MIR566
ENSG00000119922	IFIT2															ENSG00000136928	GABBR2			ENSG00000207939	MIR223
ENSG00000120051	CCDC147															ENSG00000136944	LMX1B			ENSG00000211688	TRGJP2
ENSG00000120690	ELF1															ENSG00000137171	KLC4			ENSG00000211692	TRGJP1
ENSG00000121060	TRIM25															ENSG00000137177	KIF13A			ENSG00000213203	GIMAP1
ENSG00000121413	ZSCAN18															ENSG00000137218	FRS3			ENSG00000213468	RP11-453F18__B.1
ENSG00000121680	PEX16															ENSG00000137460	FHDC1			ENSG00000214787	MS4A4E
ENSG00000121764	HCRTR1															ENSG00000137507	LRRC32			ENSG00000215246	RP11-43F13.3
ENSG00000121871	SLITRK3															ENSG00000137727	ARHGAP20			ENSG00000215302	CTD-3092A11.1
ENSG00000122085	MTERFD2															ENSG00000137878	GCOM1			ENSG00000215513	PI4KAP1
ENSG00000122566	HNRNPA2B1															ENSG00000138134	STAMBPL1			ENSG00000215630	GUSBP9
ENSG00000122678	POLM															ENSG00000138400	MDH1B			ENSG00000215790	SLC35E2
ENSG00000122783	C7orf49															ENSG00000139132	FGD4			ENSG00000223486	AC092198.1
ENSG00000122877	EGR2															ENSG00000139344	AMDHD1			ENSG00000224298	AC069363.1
ENSG00000123144	C19orf43															ENSG00000139445	FOXN4			ENSG00000226239	RP1-310O13.7
ENSG00000123374	CDK2															ENSG00000139546	TARBP2			ENSG00000226964	RHEBP2
ENSG00000123643	SLC36A1															ENSG00000139625	MAP3K12			ENSG00000227484	XX-C283C717.1
ENSG00000123870	ZNF137P															ENSG00000139835	GRTP1			ENSG00000228478	RP1-290I10.3
ENSG00000123892	RAB38															ENSG00000139926	FRMD6			ENSG00000229523	RP11-7G23.4
ENSG00000124006	OBSL1															ENSG00000140443	IGF1R			ENSG00000229727	AC013460.1
ENSG00000124019	FAM124B															ENSG00000140465	CYP1A1			ENSG00000230401	AC090505.4
ENSG00000124380	SNRNP27															ENSG00000140488	CELF6			ENSG00000230506	RP11-416N4.4
ENSG00000124535	WRNIP1															ENSG00000140511	HAPLN3			ENSG00000231091	AC138783.13
ENSG00000124702	KLHDC3															ENSG00000140545	MFGE8			ENSG00000231258	ZSWIM5P2
ENSG00000125089	SH3TC1															ENSG00000140995	DEF8			ENSG00000231536	AC123886.2
ENSG00000125538	IL1B															ENSG00000141448	GATA6			ENSG00000231690	LINC00574
ENSG00000126012	KDM5C															ENSG00000141570	CBX8			ENSG00000231951	AC004837.4
ENSG00000126107	HECTD3															ENSG00000142235	LMTK3			ENSG00000232040	SCAND3
ENSG00000126860	EVI2A															ENSG00000142279	WTIP			ENSG00000232561	GTF2IP1
ENSG00000127054	CPSF3L															ENSG00000142627	EPHA2			ENSG00000232821	AC003986.6
ENSG00000127191	TRAF2															ENSG00000142920	ADC			ENSG00000233369	RP11-396K3.1
ENSG00000127564	PKMYT1															ENSG00000143126	CELSR2			ENSG00000234493	GS1-421I3.2
ENSG00000127580	WDR24															ENSG00000143434	SEMA6C			ENSG00000235568	NFAM1
ENSG00000127954	STEAP4															ENSG00000143443	C1orf56			ENSG00000235865	GSN-AS1
ENSG00000128310	GALR3															ENSG00000143590	EFNA3			ENSG00000236308	RP11-316M21.7
ENSG00000128340	RAC2															ENSG00000143842	SOX13			ENSG00000236703	MYB-AS1
ENSG00000129315	CCNT1															ENSG00000143845	ETNK2			ENSG00000237222	AC090505.6
ENSG00000129465	RIPK3															ENSG00000144648	ACKR2			ENSG00000237604	AP001056.1
ENSG00000129667	RHBDF2															ENSG00000144649	FAM198A			ENSG00000240280	TCAM1P
ENSG00000129968	ABHD17A															ENSG00000144668	ITGA9			ENSG00000240477	RP11-63E16.1
ENSG00000130204	TOMM40															ENSG00000144730	IL17RD			ENSG00000242173	ARHGDIG
ENSG00000130332	LSM7															ENSG00000144893	MED12L			ENSG00000244573	RPL30P11
ENSG00000130720	FIBCD1															ENSG00000144935	TRPC1			ENSG00000244694	PTCHD4
ENSG00000130779	CLIP1															ENSG00000145506	NKD2			ENSG00000245910	SNHG6
ENSG00000130803	ZNF317															ENSG00000145642	FAM159B			ENSG00000246082	NUDT16P1
ENSG00000131400	NAPSA															ENSG00000145730	PAM			ENSG00000246526	RP11-539L10.2
ENSG00000131788	PIAS3															ENSG00000145777	TSLP			ENSG00000247011	RP11-700H6.1
ENSG00000132274	TRIM22															ENSG00000145808	ADAMTS19			ENSG00000247809	NR2F2-AS1
ENSG00000132275	RRP8															ENSG00000146054	TRIM7			ENSG00000249149	RP11-79P5.3
ENSG00000132300	PTCD3															ENSG00000146374	RSPO3			ENSG00000249639	CTB-138E5.1
ENSG00000132329	RAMP1															ENSG00000146828	SLC12A9			ENSG00000250608	RP11-933H2.4
ENSG00000132334	PTPRE															ENSG00000147027	TMEM47			ENSG00000251188	RP11-478C6.6
ENSG00000132510	KDM6B															ENSG00000147862	NFIB			ENSG00000251665	RP11-700H6.2
ENSG00000132912	DCTN4															ENSG00000148200	NR6A1			ENSG00000251670	CTD-2532K18.1
ENSG00000132965	ALOX5AP															ENSG00000148488	ST8SIA6			ENSG00000251689	RP11-478C6.5
ENSG00000133048	CHI3L1															ENSG00000148498	PARD3			ENSG00000253554	RP11-32K4.1
ENSG00000133055	MYBPH															ENSG00000149418	ST14			ENSG00000253882	RP11-61L23.2
ENSG00000133195	SLC39A11															ENSG00000149927	DOC2A			ENSG00000253981	ALG1L13P
ENSG00000133665	DYDC2															ENSG00000151322	NPAS3			ENSG00000254341	SNORD87
ENSG00000133773	CCDC59															ENSG00000151612	ZNF827			ENSG00000254536	RP11-108K14.8
ENSG00000133805	AMPD3															ENSG00000151615	POU4F2			ENSG00000255345	CTD-2337I7.1
ENSG00000133895	MEN1															ENSG00000151623	NR3C2			ENSG00000255581	RP11-69M1.4
ENSG00000134201	GSTM5															ENSG00000152315	KCNK13			ENSG00000255833	TIFAB
ENSG00000134294	SLC38A2															ENSG00000152784	PRDM8			ENSG00000256139	RP11-968O1.5
ENSG00000134321	RSAD2															ENSG00000153162	BMP6			ENSG00000256515	CCL3L3
ENSG00000134419	RPS15A															ENSG00000153904	DDAH1			ENSG00000256751	RP11-695J4.2
ENSG00000134531	EMP1															ENSG00000154102	C16orf74			ENSG00000257221	RP11-689B22.2
ENSG00000134830	C5AR2															ENSG00000154127	UBASH3B			ENSG00000258320	RP11-274M17.1
ENSG00000134882	UBAC2															ENSG00000154134	ROBO3			ENSG00000258420	RP11-403B2.3
ENSG00000135046	ANXA1															ENSG00000154153	FAM134B			ENSG00000258670	RP11-1042B17.3
ENSG00000135077	HAVCR2															ENSG00000154319	FAM167A			ENSG00000259003	AE000662.92
ENSG00000135090	TAOK3															ENSG00000154639	CXADR			ENSG00000259054	AE000662.93
ENSG00000135094	SDS															ENSG00000155893	ACPL2			ENSG00000259328	RP11-152F13.7
ENSG00000135124	P2RX4															ENSG00000157388	CACNA1D			ENSG00000259345	RP11-624L4.1
ENSG00000135213	POM121C															ENSG00000157404	KIT			ENSG00000259383	RP11-403B2.6
ENSG00000135372	NAT10															ENSG00000157870	FAM213B			ENSG00000259420	RP11-307C19.2
ENSG00000135387	CAPRIN1															ENSG00000158856	DMTN			ENSG00000259439	RP11-89K21.1
ENSG00000135439	AGAP2															ENSG00000159307	SCUBE1			ENSG00000259443	RP11-403B2.5
ENSG00000135446	CDK4															ENSG00000159387	IRX6			ENSG00000259476	RP11-50C13.2
ENSG00000135452	TSPAN31															ENSG00000159712	ANKRD18CP			ENSG00000259551	RP11-182J1.10
ENSG00000135596	MICAL1															ENSG00000159753	RLTPR			ENSG00000259764	RP11-299G20.3
ENSG00000135905	DOCK10															ENSG00000159958	TNFRSF13C			ENSG00000259783	RP11-1006G14.2
ENSG00000136161	RCBTB2															ENSG00000160439	RDH13			ENSG00000259909	RP11-1006G14.3
ENSG00000136270	TBRG4															ENSG00000160460	SPTBN4			ENSG00000259993	RP11-261B23.1
ENSG00000136527	TRA2B															ENSG00000160932	LY6E			ENSG00000260177	RP4-536B24.3
ENSG00000136560	TANK															ENSG00000160953	MUM1			ENSG00000260498	RP4-536B24.4
ENSG00000136830	FAM129B															ENSG00000160963	COL26A1			ENSG00000260907	AC008088.4
ENSG00000136840	ST6GALNAC4															ENSG00000161243	FBXO27			ENSG00000261703	RP11-327F22.5
ENSG00000136866	ZFP37															ENSG00000161381	PLXDC1			ENSG00000262074	SNORD3B-2
ENSG00000136869	TLR4															ENSG00000161682	FAM171A2			ENSG00000262539	RP11-259G18.3
ENSG00000137154	RPS6															ENSG00000162426	SLC45A1			ENSG00000263264	CTB-133G6.1
ENSG00000137193	PIM1															ENSG00000162433	AK4			ENSG00000263280	LA16c-325D7.2
ENSG00000137959	IFI44L															ENSG00000162437	RAVER2			ENSG00000263818	CTD-2206N4.4
ENSG00000137965	IFI44															ENSG00000162444	RBP7			ENSG00000263875	AL353629.1
ENSG00000138835	RGS3															ENSG00000162512	SDC3			ENSG00000263958	RP11-676J15.1
ENSG00000138964	PARVG															ENSG00000162746	FCRLB			ENSG00000264371	MIR4425
ENSG00000139278	GLIPR1															ENSG00000162817	C1orf115			ENSG00000264583	MIR4487
ENSG00000139537	CCDC65															ENSG00000162975	KCNF1			ENSG00000264823	MIR3154
ENSG00000139572	GPR84															ENSG00000163083	INHBB			ENSG00000264984	MIR5691
ENSG00000139626	ITGB7															ENSG00000163273	NPPC			ENSG00000265916	RP11-434D2.9
ENSG00000140379	BCL2A1															ENSG00000163293	NIPAL1			ENSG00000266890	MIR4634
ENSG00000140464	PML															ENSG00000163629	PTPN13			ENSG00000267095	CTD-2319I12.5
ENSG00000140678	ITGAX															ENSG00000163947	ARHGEF3			ENSG00000267265	CTC-550B14.7
ENSG00000141736	ERBB2															ENSG00000163995	ABLIM2			ENSG00000267295	CTD-2319I12.3
ENSG00000141994	DUS3L															ENSG00000164061	BSN			ENSG00000267913	AP001055.1
ENSG00000142227	EMP3															ENSG00000164076	CAMKV			ENSG00000268791	AC093323.1
ENSG00000142330	CAPN10															ENSG00000164161	HHIP			ENSG00000269051	CTD-2245F17.3
ENSG00000142733	MAP3K6															ENSG00000164236	ANKRD33B			ENSG00000269243	CTD-2231E14.8
ENSG00000143321	HDGF															ENSG00000164237	CMBL			ENSG00000269392	CTB-191K22.6
ENSG00000143369	ECM1															ENSG00000164323	KIAA1430			ENSG00000269404	SPIB
ENSG00000143507	DUSP10															ENSG00000164398	ACSL6			ENSG00000270123	VTRNA2-1
ENSG00000143549	TPM3															ENSG00000164402	SEPT8			ENSG00000270598	RP11-396C23.3
ENSG00000143761	ARF1															ENSG00000164483	SAMD3			ENSG00000270773	RP13-685P2.7
ENSG00000144136	SLC20A1															ENSG00000164484	TMEM200A			ENSG00000271314	RP11-435O5.6
ENSG00000144158	RP11-395L14.17															ENSG00000164746	C7orf57			ENSG00000271333	RP11-382B18.5
ENSG00000144381	HSPD1															ENSG00000164778	EN2			ENSG00000271443	RP11-541E12.1
ENSG00000144736	SHQ1															ENSG00000164841	TMEM74			ENSG00000271858	XXcos-LUCA11.4
ENSG00000144792	ZNF660															ENSG00000165124	SVEP1			ENSG00000272774	RP11-433A10.3
ENSG00000145050	MANF															ENSG00000165140	FBP1			ENSG00000272874	RP5-1103G7.10
ENSG00000145819	ARHGAP26															ENSG00000165238	WNK2			ENSG00000273428	RP4-539M6.22
ENSG00000145901	TNIP1															ENSG00000165633	VSTM4
ENSG00000146232	NFKBIE															ENSG00000165795	NDRG2
ENSG00000146535	GNA12															ENSG00000165804	ZNF219
ENSG00000146859	TMEM140															ENSG00000165912	PACSIN3
ENSG00000147454	SLC25A37															ENSG00000165966	PDZRN4
ENSG00000147509	RGS20															ENSG00000165972	CCDC38
ENSG00000147526	TACC1															ENSG00000166016	ABTB2
ENSG00000147576	ADHFE1															ENSG00000166145	SPINT1
ENSG00000148180	GSN															ENSG00000166394	CYB5R2
ENSG00000148290	SURF1															ENSG00000166407	LMO1
ENSG00000148335	NTMT1															ENSG00000166833	NAV2
ENSG00000148399	DPH7															ENSG00000166897	ELFN2
ENSG00000148841	ITPRIP															ENSG00000167100	SAMD14
ENSG00000148908	RGS10															ENSG00000167105	TMEM92
ENSG00000148948	LRRC4C															ENSG00000167194	C16orf92
ENSG00000149115	TNKS1BP1															ENSG00000167535	CACNB3
ENSG00000149357	LAMTOR1															ENSG00000167619	TMEM145
ENSG00000149531	FRG1B															ENSG00000168348	INSM2
ENSG00000149635	OCSTAMP															ENSG00000168502	SOGA2
ENSG00000149639	SOGA1															ENSG00000168758	SEMA4C
ENSG00000149781	FERMT3															ENSG00000168772	CXXC4
ENSG00000149798	CDC42EP2															ENSG00000168913	ENHO
ENSG00000150093	ITGB1															ENSG00000169856	ONECUT1
ENSG00000152433	ZNF547															ENSG00000169933	FRMPD4
ENSG00000152439	ZNF773															ENSG00000169991	IFFO2
ENSG00000152578	GRIA4															ENSG00000170214	ADRA1B
ENSG00000154358	OBSCN															ENSG00000170485	NPAS2
ENSG00000155368	DBI															ENSG00000170776	AKAP13
ENSG00000155465	SLC7A7															ENSG00000171004	HS6ST2
ENSG00000156011	PSD3															ENSG00000171016	PYGO1
ENSG00000156030	ELMSAN1															ENSG00000171045	TSNARE1
ENSG00000156299	TIAM1															ENSG00000171453	POLR1C
ENSG00000156858	PRR14															ENSG00000171695	C20orf201
ENSG00000157227	MMP14															ENSG00000171843	MLLT3
ENSG00000158062	UBXN11															ENSG00000171873	ADRA1D
ENSG00000158286	RNF207															ENSG00000172159	FRMD3
ENSG00000158714	SLAMF8															ENSG00000172350	ABCG4
ENSG00000158859	ADAMTS4															ENSG00000172757	CFL1
ENSG00000158864	NDUFS2															ENSG00000172794	RAB37
ENSG00000159723	AGRP															ENSG00000172803	SNX32
ENSG00000159788	RGS12															ENSG00000172819	RARG
ENSG00000159840	ZYX															ENSG00000173295	FAM86B3P
ENSG00000160214	RRP1															ENSG00000173320	STOX2
ENSG00000160298	C21orf58															ENSG00000173698	GPR64
ENSG00000160325	CACFD1															ENSG00000173868	PHOSPHO1
ENSG00000160691	SHC1															ENSG00000174145	KIAA1239
ENSG00000160785	SLC25A44															ENSG00000174460	ZCCHC12
ENSG00000160789	LMNA															ENSG00000175170	FAM182B
ENSG00000160932	LY6E															ENSG00000175556	LONRF3
ENSG00000161204	ABCF3															ENSG00000175832	ETV4
ENSG00000161551	ZNF577															ENSG00000175874	CREG2
ENSG00000161970	RPL26															ENSG00000176136	MC5R
ENSG00000161996	WDR90															ENSG00000176387	HSD11B2
ENSG00000162086	ZNF75A															ENSG00000176406	RIMS2
ENSG00000162104	ADCY9															ENSG00000176595	KBTBD11
ENSG00000162490	DRAXIN															ENSG00000176845	METRNL
ENSG00000162511	LAPTM5															ENSG00000177098	SCN4B
ENSG00000162645	GBP2															ENSG00000177106	EPS8L2
ENSG00000162654	GBP4															ENSG00000177272	KCNA3
ENSG00000162714	ZNF496															ENSG00000177359	RP11-551L14.1
ENSG00000162777	DENND2D															ENSG00000177374	HIC1
ENSG00000162981	FAM84A															ENSG00000177453	NIM1K
ENSG00000163170	BOLA3															ENSG00000177822	AC108142.1
ENSG00000163362	C1orf106															ENSG00000179111	HES7
ENSG00000163466	ARPC2															ENSG00000179168	GGN
ENSG00000163565	IFI16															ENSG00000179388	EGR3
ENSG00000163884	KLF15															ENSG00000179477	ALOX12B
ENSG00000163932	PRKCD															ENSG00000179636	TPPP2
ENSG00000164054	SHISA5															ENSG00000179673	RPRML
ENSG00000164081	TEX264															ENSG00000180071	ANKRD18A
ENSG00000164330	EBF1															ENSG00000180155	LYNX1
ENSG00000164631	ZNF12															ENSG00000180279	CTD-2568A17.5
ENSG00000164691	TAGAP															ENSG00000180667	YOD1
ENSG00000164880	INTS1															ENSG00000180828	BHLHE22
ENSG00000165458	INPPL1															ENSG00000180914	OXTR
ENSG00000165689	SDCCAG3															ENSG00000181061	HIGD1A
ENSG00000165912	PACSIN3															ENSG00000181104	F2R
ENSG00000165915	SLC39A13															ENSG00000181409	AATK
ENSG00000165949	IFI27															ENSG00000181754	AMIGO1
ENSG00000166710	B2M															ENSG00000181965	NEUROG1
ENSG00000166886	NAB2															ENSG00000182175	RGMA
ENSG00000166888	STAT6															ENSG00000182197	EXT1
ENSG00000166987	MBD6															ENSG00000182759	MAFA
ENSG00000167005	NUDT21															ENSG00000182957	SPATA13
ENSG00000167077	MEI1															ENSG00000182985	CADM1
ENSG00000167210	LOXHD1															ENSG00000183087	GAS6
ENSG00000167378	IRGQ															ENSG00000183092	BEGAIN
ENSG00000167460	TPM4															ENSG00000183186	C2CD4C
ENSG00000167549	CORO6															ENSG00000183597	TANGO2
ENSG00000167716	WDR81															ENSG00000183655	KLHL25
ENSG00000167748	KLK1															ENSG00000183682	BMP8A
ENSG00000167851	CD300A															ENSG00000183780	SLC35F3
ENSG00000167874	TMEM88															ENSG00000184058	TBX1
ENSG00000167945	PRR25															ENSG00000184160	ADRA2C
ENSG00000167977	KCTD5															ENSG00000184203	PPP1R2
ENSG00000168003	SLC3A2															ENSG00000184221	OLIG1
ENSG00000168016	TRANK1															ENSG00000184486	POU3F2
ENSG00000168062	BATF2															ENSG00000184545	DUSP8
ENSG00000168067	MAP4K2															ENSG00000185046	ANKS1B
ENSG00000168310	IRF2															ENSG00000185269	NOTUM
ENSG00000168389	MFSD2A															ENSG00000185352	HS6ST3
ENSG00000168394	TAP1															ENSG00000185519	FAM131C
ENSG00000168522	FNTA															ENSG00000185737	NRG3
ENSG00000168575	SLC20A2															ENSG00000185742	C11orf87
ENSG00000168936	TMEM129															ENSG00000185800	DMWD
ENSG00000169047	IRS1															ENSG00000185920	PTCH1
ENSG00000169057	MECP2															ENSG00000185924	RTN4RL1
ENSG00000169442	CD52															ENSG00000186326	RGS9BP
ENSG00000169508	GPR183															ENSG00000186479	RGS7BP
ENSG00000169567	HINT1															ENSG00000186530	XKR5
ENSG00000169683	LRRC45															ENSG00000186806	VSIG10L
ENSG00000169727	GPS1															ENSG00000186907	RTN4RL2
ENSG00000169756	LIMS1															ENSG00000186994	KANK3
ENSG00000169896	ITGAM															ENSG00000187479	C11orf96
ENSG00000170631	ZNF16															ENSG00000187556	NANOS3
ENSG00000170776	AKAP13															ENSG00000187566	NHLRC1
ENSG00000170788	DYDC1															ENSG00000187634	SAMD11
ENSG00000170836	PPM1D															ENSG00000187678	SPRY4
ENSG00000170954	ZNF415															ENSG00000188042	ARL4C
ENSG00000171115	GIMAP8															ENSG00000188064	WNT7B
ENSG00000171206	TRIM8															ENSG00000188523	C9orf171
ENSG00000171291	ZNF439															ENSG00000188766	SPRED3
ENSG00000171606	ZNF274															ENSG00000189157	FAM47E
ENSG00000171817	ZNF540															ENSG00000196358	NTNG2
ENSG00000172081	MOB3A															ENSG00000196411	EPHB4
ENSG00000172123	SLFN12															ENSG00000196562	SULF2
ENSG00000172273	HINFP															ENSG00000196581	AJAP1
ENSG00000172349	IL16															ENSG00000196711	FAM150A
ENSG00000172366	FAM195A															ENSG00000196748	CLPSL2
ENSG00000172613	RAD9A															ENSG00000196872	KIAA1211L
ENSG00000172725	CORO1B															ENSG00000197183	C20orf112
ENSG00000172927	MYEOV															ENSG00000197321	SVIL
ENSG00000173020	ADRBK1															ENSG00000197467	COL13A1
ENSG00000173153	ESRRA															ENSG00000197763	TXNRD3
ENSG00000173198	CYSLTR1															ENSG00000197921	HES5
ENSG00000173327	MAP3K11															ENSG00000198055	GRK6
ENSG00000173421	CCDC36															ENSG00000198088	NUP62CL
ENSG00000173511	VEGFB															ENSG00000198515	CNGA1
ENSG00000173599	PC															ENSG00000198719	DLL1
ENSG00000173786	CNP															ENSG00000198794	SCAMP5
ENSG00000174238	PITPNA															ENSG00000198910	L1CAM
ENSG00000174718	KIAA1551															ENSG00000198929	NOS1AP
ENSG00000174788	PCP2															ENSG00000203401	AC009061.1
ENSG00000175489	LRRC25															ENSG00000203722	RAET1G
ENSG00000176108	CHMP6															ENSG00000204052	LRRC73
ENSG00000176248	ANAPC2															ENSG00000204121	AC068134.5
ENSG00000176371	ZSCAN2															ENSG00000204131	NHSL2
ENSG00000176845	METRNL															ENSG00000204314	PRRT1
ENSG00000176909	MAMSTR															ENSG00000204650	CRHR1-IT1
ENSG00000176986	SEC24C															ENSG00000204860	FAM201A
ENSG00000177025	C19orf18															ENSG00000204869	IGFL4
ENSG00000177051	FBXO46															ENSG00000206120	EGFEM1P
ENSG00000177105	RHOG															ENSG00000206177	HBM
ENSG00000177409	SAMD9L															ENSG00000206178	HBZP1
ENSG00000177791	MYOZ1															ENSG00000206579	XKR4
ENSG00000177830	CHID1															ENSG00000207611	MIR149
ENSG00000177839	PCDHB9															ENSG00000207647	MIR153-1
ENSG00000177963	RIC8A															ENSG00000211528	AP001525.1
ENSG00000178035	IMPDH2															ENSG00000213213	CCDC183
ENSG00000178104	PDE4DIP															ENSG00000213420	GPC2
ENSG00000178187	ZNF454															ENSG00000213853	EMP2
ENSG00000178297	TMPRSS9															ENSG00000214357	NEURL1B
ENSG00000178381	ZFAND2A															ENSG00000214546	AC087491.2
ENSG00000178917	ZNF852															ENSG00000214999	AC129492.6
ENSG00000179088	C12orf42															ENSG00000218336	TENM3
ENSG00000179133	C10orf67															ENSG00000218358	RAET1K
ENSG00000179262	RAD23A															ENSG00000218416	AC110619.2
ENSG00000179335	CLK3															ENSG00000220008	LINGO3
ENSG00000179348	GATA2															ENSG00000220161	RP1-37N7.3
ENSG00000179526	SHARPIN															ENSG00000221544	AL359709.1
ENSG00000180104	EXOC3															ENSG00000221988	PPT2
ENSG00000180448	HMHA1															ENSG00000223495	RP11-763B22.7
ENSG00000180458	CTD-3064H18.4															ENSG00000223711	AC091633.3
ENSG00000180884	ZNF792															ENSG00000224842	RP11-123K19.1
ENSG00000180891	CUEDC1															ENSG00000225180	AATK-AS1
ENSG00000181038	METTL23															ENSG00000225280	RP11-227D2.3
ENSG00000181634	TNFSF15															ENSG00000225362	CT62
ENSG00000181638	ZFP41															ENSG00000225407	CTD-2384B11.2
ENSG00000181804	SLC9A9															ENSG00000225783	MIAT
ENSG00000181894	ZNF329															ENSG00000226355	RP11-65J3.2
ENSG00000181982	CCDC149															ENSG00000226386	PARD3-AS1
ENSG00000182087	TMEM259															ENSG00000226886	AC093787.1
ENSG00000182158	CREB3L2															ENSG00000226913	BSN-AS2
ENSG00000182310	SPACA6P															ENSG00000226969	RP11-547D24.3
ENSG00000182372	CLN8															ENSG00000227640	SOX21-AS1
ENSG00000182568	SATB1															ENSG00000227757	AP000282.2
ENSG00000182896	TMEM95															ENSG00000227825	SLC9A7P1
ENSG00000183086	GATSL1															ENSG00000227959	RP11-276H7.2
ENSG00000183196	CHST6															ENSG00000229212	RP11-561C5.4
ENSG00000183260	ABHD16B															ENSG00000229262	RP4-726N1.2
ENSG00000183378	OVCH2															ENSG00000230453	ANKRD18B
ENSG00000183474	GTF2H2C															ENSG00000230729	RP11-296L22.8
ENSG00000183576	SETD3															ENSG00000231121	RP1-34H18.1
ENSG00000183726	TMEM50A															ENSG00000231185	AC005592.2
ENSG00000183751	TBL3															ENSG00000231198	AC004987.10
ENSG00000183828	NUDT14															ENSG00000231448	RP11-763B22.9
ENSG00000183929	DUSP5P1															ENSG00000231585	AC034228.2
ENSG00000184110	EIF3C															ENSG00000231752	EMBP1
ENSG00000184640	SEPT9															ENSG00000232034	AC092168.2
ENSG00000184939	ZFP90															ENSG00000232070	TMEM253
ENSG00000185215	TNFAIP2															ENSG00000232431	RP11-578F21.10
ENSG00000185324	CDK10															ENSG00000232480	RP11-224O19.2
ENSG00000185432	METTL7A															ENSG00000233225	AC004987.9
ENSG00000185504	C17orf70															ENSG00000233237	LINC00472
ENSG00000185567	AHNAK2															ENSG00000233255	AC019181.2
ENSG00000185670	ZBTB3															ENSG00000233332	RP4-799P18.2
ENSG00000185745	IFIT1															ENSG00000233930	KRTAP5-AS1
ENSG00000185811	IKZF1															ENSG00000234546	RP3-510D11.2
ENSG00000185825	BCAP31															ENSG00000235501	RP4-639F20.1
ENSG00000185829	ARL17A															ENSG00000235887	RP11-763B22.6
ENSG00000185885	IFITM1															ENSG00000236279	CLEC2L
ENSG00000186047	DLEU7															ENSG00000236311	TLX1NB
ENSG00000186272	ZNF17															ENSG00000236544	AC008060.8
ENSG00000186480	INSIG1															ENSG00000236643	RP11-175D17.3
ENSG00000186818	LILRB4															ENSG00000236833	AC024560.2
ENSG00000186866	POFUT2															ENSG00000237087	AC068134.6
ENSG00000187372	PCDHB13															ENSG00000237412	PRSS56
ENSG00000187688	TRPV2															ENSG00000237461	RP11-554F20.1
ENSG00000187955	COL14A1															ENSG00000237742	RP11-624M8.1
ENSG00000188033	ZNF490															ENSG00000237863	RP6-24A23.3
ENSG00000188070	C11orf95															ENSG00000242265	PEG10
ENSG00000188321	ZNF559															ENSG00000242732	RGAG4
ENSG00000188681	TEKT4P2															ENSG00000243018	RP5-1070G24.2
ENSG00000189042	ZNF567															ENSG00000243244	STON1
ENSG00000189077	TMEM120A															ENSG00000243902	RP1-63G5.5
ENSG00000196141	SPATS2L															ENSG00000244486	SCARF2
ENSG00000196218	RYR1															ENSG00000244558	RP11-445H22.4
ENSG00000196295	AC005154.6															ENSG00000245384	AC004053.1
ENSG00000196361	ELAVL3															ENSG00000245857	GS1-24F4.2
ENSG00000196367	TRRAP															ENSG00000246214	RP11-260E18.1
ENSG00000196569	LAMA2															ENSG00000246334	PRR7-AS1
ENSG00000196576	PLXNB2															ENSG00000246985	SOCS2-AS1
ENSG00000196712	NF1															ENSG00000247193	RP11-431M7.3
ENSG00000196922	ZNF252P															ENSG00000247317	RP11-273G15.2
ENSG00000196943	NOP9															ENSG00000248266	RP11-402C9.1
ENSG00000196954	CASP4															ENSG00000248345	RP11-262D11.1
ENSG00000197182	FLJ27365															ENSG00000248514	CTC-338M12.1
ENSG00000197324	LRP10															ENSG00000248596	RP11-844P9.2
ENSG00000197405	C5AR1															ENSG00000248890	HHIP-AS1
ENSG00000197461	PDGFA															ENSG00000249167	CTB-118N6.2
ENSG00000197497	ZNF665															ENSG00000249421	ADAMTS19-AS1
ENSG00000197943	PLCG2															ENSG00000249693	THEGL
ENSG00000197971	MBP															ENSG00000249853	HS3ST5
ENSG00000198131	ZNF544															ENSG00000250360	CTD-2089N3.1
ENSG00000198369	SPRED2															ENSG00000250415	CTC-461F20.1
ENSG00000198431	TXNRD1															ENSG00000250510	GPR162
ENSG00000198464	ZNF480															ENSG00000251322	SHANK3
ENSG00000198466	ZNF587															ENSG00000252695	MIR2276
ENSG00000198556	ZNF789															ENSG00000253379	RP11-1102P16.1
ENSG00000198795	ZNF521															ENSG00000253653	CTC-248O19.1
ENSG00000198818	SFT2D1															ENSG00000253764	RP11-439C15.4
ENSG00000198821	CD247															ENSG00000253893	FAM85B
ENSG00000198972	MIRLET7E															ENSG00000254102	RP11-21C4.1
ENSG00000199352	RNA5S1															ENSG00000254333	CTC-367J11.1
ENSG00000199357	Y_RNA															ENSG00000254854	CTD-2523D13.2
ENSG00000199360	RNU6-1115P															ENSG00000254973	RP11-429J17.7
ENSG00000199366	Y_RNA															ENSG00000255136	CTD-2562J17.4
ENSG00000199712	SNORD115-2															ENSG00000255367	RP13-726E6.2
ENSG00000199782	SNORD115-9															ENSG00000255529	POLR2M
ENSG00000199970	SNORD115-3															ENSG00000255571	LINC00925
ENSG00000200169	RNU5D-1															ENSG00000255735	AC110619.1
ENSG00000200463	SNORD118															ENSG00000256951	AC055876.1
ENSG00000200486	SNORD115-11															ENSG00000258355	RP11-651L5.2
ENSG00000200503	SNORD115-5															ENSG00000258388	PPT2-EGFL8
ENSG00000200656	SNORA5B															ENSG00000258576	CTD-2644I21.1
ENSG00000200661	SNORD116-10															ENSG00000258604	AL161668.5
ENSG00000200680	SNORD115-4															ENSG00000258947	TUBB3
ENSG00000200726	SNORD115-8															ENSG00000259006	RP11-566K11.4
ENSG00000200812	SNORD115-6															ENSG00000259424	RP11-35O15.1
ENSG00000201457	SNORA55															ENSG00000259439	RP11-89K21.1
ENSG00000201654	RNU6-7															ENSG00000260681	CTA-363E6.5
ENSG00000201741	Y_RNA															ENSG00000260876	RP11-345M22.1
ENSG00000201772	SNORA5C															ENSG00000260992	DOCK9-AS2
ENSG00000201800	Y_RNA															ENSG00000261183	RP11-532F12.5
ENSG00000201831	SNORD115-1															ENSG00000261320	RP11-297D21.2
ENSG00000201943	SNORD115-10															ENSG00000261377	RP11-578F21.12
ENSG00000202056	RNA5SP19															ENSG00000261390	RP11-345M22.2
ENSG00000202337	RNU6-8															ENSG00000261594	TPBGL
ENSG00000202360	RN7SKP249															ENSG00000261659	LA16c-313D11.12
ENSG00000202569	MIR146B															ENSG00000261693	RP13-467H17.1
ENSG00000203614	AL512652.1															ENSG00000262768	RP11-353N14.1
ENSG00000203667	COX20															ENSG00000262869	CTD-2545H1.1
ENSG00000203943	SAMD13															ENSG00000263142	LRRC37A17P
ENSG00000204138	PHACTR4															ENSG00000263155	MYZAP
ENSG00000204228	HSD17B8															ENSG00000263715	RP11-105N13.4
ENSG00000204316	MRPL38															ENSG00000264323	AC093887.1
ENSG00000204351	SKIV2L															ENSG00000265489	RP11-1090M7.1
ENSG00000204514	ZNF814															ENSG00000265610	CR536603.1
ENSG00000204571	KRTAP5-11															ENSG00000265962	RP11-674N23.1
ENSG00000204666	CTD-2126E3.1															ENSG00000266010	GATA6-AS1
ENSG00000204876	AC021218.2															ENSG00000266778	hsa-mir-548ba
ENSG00000204920	ZNF155															ENSG00000267036	AC005559.3
ENSG00000204982	PRSS3P4															ENSG00000267634	RPL7L1P5
ENSG00000205246	RPSAP58															ENSG00000267747	RP11-392O1.4
ENSG00000205414	RP11-401P9.6															ENSG00000267905	CTD-2616J11.16
ENSG00000205643	CDPF1															ENSG00000267992	CTB-189B5.3
ENSG00000206053	HN1L															ENSG00000268655	CTB-60B18.10
ENSG00000206609	SNORD116-11															ENSG00000268812	RP1-102K2.8
ENSG00000206621	SNORD116-14															ENSG00000269169	AC004528.1
ENSG00000206656	SNORD116-17															ENSG00000269190	FBXO17
ENSG00000206688	SNORD116-18															ENSG00000269547	CTC-360G5.8
ENSG00000206727	SNORD116-9															ENSG00000269800	PLEKHA3P1
ENSG00000206838	SNORA5A															ENSG00000269814	CTC-273B12.10
ENSG00000206888	RNU6-48P															ENSG00000270175	RP11-793H13.11
ENSG00000206920	RNY1P6															ENSG00000270522	RP11-168P13.1
ENSG00000206974	RNU6-1144P															ENSG00000270607	RP11-359E10.1
ENSG00000207001	SNORD116-2															ENSG00000270988	RP11-439C15.5
ENSG00000207014	SNORD116-3															ENSG00000271133	CTA-293F17.1
ENSG00000207063	SNORD116-1															ENSG00000271776	RP11-52L5.6
ENSG00000207093	SNORD116-8															ENSG00000272082	AC093628.1
ENSG00000207124	RNU6-163P															ENSG00000272170	RP11-387M24.5
ENSG00000207133	SNORD116-7															ENSG00000272202	RP11-157F20.3
ENSG00000207137	SNORD116-13															ENSG00000272414	FAM47E-STBD1
ENSG00000207174	SNORD116-15															ENSG00000272583	RP11-344P13.6
ENSG00000207191	SNORD116-5															ENSG00000272636	DOC2B
ENSG00000207197	SNORD116-12															ENSG00000272679	RP11-216L13.18
ENSG00000207233	SNORA37															ENSG00000272691	RP11-290M5.4
ENSG00000207263	SNORD116-16															ENSG00000272695	GAS6-AS2
ENSG00000207375	SNORD116-23															ENSG00000272715	RP4-753F5.1
ENSG00000207442	SNORD116-6															ENSG00000273025	CELF6
ENSG00000207460	SNORD116-19															ENSG00000273066	RP11-216L13.19
ENSG00000207550	MIR99B															ENSG00000273107	RP11-165A20.3
ENSG00000207782	MIR150															ENSG00000273216	AC002059.10
ENSG00000208008	MIR125A
ENSG00000211482	AC092574.1
ENSG00000211863	TRAJ26
ENSG00000211864	TRAJ25
ENSG00000211865	TRAJ24
ENSG00000211866	TRAJ23
ENSG00000211867	TRAJ22
ENSG00000211868	TRAJ21
ENSG00000211869	TRAJ20
ENSG00000211870	TRAJ19
ENSG00000211871	TRAJ18
ENSG00000211872	TRAJ17
ENSG00000211873	TRAJ16
ENSG00000211874	TRAJ15
ENSG00000211875	TRAJ14
ENSG00000211876	TRAJ13
ENSG00000211877	TRAJ12
ENSG00000211878	TRAJ11
ENSG00000211879	TRAJ10
ENSG00000212123	PRR22
ENSG00000212694	AC084018.1
ENSG00000212951	RP11-211N8.3
ENSG00000213149	CNN2P9
ENSG00000213293	CTD-2666L21.3
ENSG00000213638	ADAT3
ENSG00000213755	RP11-342F17.1
ENSG00000213793	ZNF888
ENSG00000213976	CTD-2561J22.2
ENSG00000214194	LINC00998
ENSG00000214753	HNRNPUL2
ENSG00000214788	OOSP1
ENSG00000214796	RP11-480I12.5
ENSG00000214803	RP11-37N22.1
ENSG00000214820	MPRIPP1
ENSG00000215021	PHB2
ENSG00000215458	AP001053.11
ENSG00000215795	RP11-488L18.3
ENSG00000216004	AL359832.1
ENSG00000216054	AC019201.1
ENSG00000217231	RP3-340H11.2
ENSG00000217488	RP11-474L11.5
ENSG00000217801	RP11-465B22.3
ENSG00000221343	AC010422.1
ENSG00000221400	U3
ENSG00000221523	AC079080.1
ENSG00000221955	SLC12A8
ENSG00000222335	Y_RNA
ENSG00000224078	SNHG14
ENSG00000224215	RP11-371A19.2
ENSG00000225190	PLEKHM1
ENSG00000225194	LINC00092
ENSG00000225331	AP001055.6
ENSG00000225434	RP11-63P12.6
ENSG00000225470	JPX
ENSG00000225511	LINC00475
ENSG00000225606	AC005281.2
ENSG00000225886	RP11-288L9.4
ENSG00000226007	RP11-211N8.2
ENSG00000226245	ZNF32-AS1
ENSG00000226332	RP11-157P1.4
ENSG00000226791	AC109826.1
ENSG00000226944	RP1-120G22.11
ENSG00000227184	EPPK1
ENSG00000227500	SCAMP4
ENSG00000227508	RP5-894D12.3
ENSG00000227512	RP11-413M3.4
ENSG00000227630	LINC01132
ENSG00000228007	AC011933.2
ENSG00000228512	RP11-281A20.2
ENSG00000228651	RP11-556E13.1
ENSG00000229116	RP11-20J15.3
ENSG00000229320	KRT8P12
ENSG00000229386	OR8B9P
ENSG00000229388	RP11-442N24__B.1
ENSG00000229485	KSR1P1
ENSG00000229647	AC007879.7
ENSG00000229702	RP1-274L7.1
ENSG00000229848	RP13-766D20.2
ENSG00000229974	AC083862.1
ENSG00000230366	DSCR9
ENSG00000230385	AC012507.4
ENSG00000230832	RP11-325P15.2
ENSG00000231119	RP4-569M23.2
ENSG00000231233	CCDC147-AS1
ENSG00000231521	RP11-244N9.4
ENSG00000231651	DLG3-AS1
ENSG00000232046	AC007392.3
ENSG00000232422	KNOP1P4
ENSG00000232434	C9orf172
ENSG00000232495	AC069287.1
ENSG00000233038	AC011899.9
ENSG00000233117	LINC00702
ENSG00000233231	HNRNPA1P49
ENSG00000233429	HOTAIRM1
ENSG00000233452	STXBP5-AS1
ENSG00000233527	AC092295.7
ENSG00000233536	RP11-867G2.5
ENSG00000233836	RP11-255H23.2
ENSG00000234142	RP11-276E17.2
ENSG00000234902	AC007879.2
ENSG00000235217	TSPY26P
ENSG00000236471	AF127577.12
ENSG00000236536	AC003986.7
ENSG00000236830	CBR3-AS1
ENSG00000237468	RP11-715G15.1
ENSG00000237512	UNC5B-AS1
ENSG00000237594	AP000251.3
ENSG00000237803	LINC00211
ENSG00000237955	AC008746.10
ENSG00000238160	AC116366.5
ENSG00000238279	BX470102.3
ENSG00000238774	AC009121.1
ENSG00000238795	SCARNA12
ENSG00000239367	RN7SL477P
ENSG00000239593	RP11-477J21.6
ENSG00000239617	RP11-302B13.1
ENSG00000240106	RN7SL146P
ENSG00000240350	AC017002.1
ENSG00000240440	AC007879.3
ENSG00000240616	AD000092.3
ENSG00000240731	RP5-890O3.9
ENSG00000241547	RP11-4K3__A.5
ENSG00000241978	AKAP2
ENSG00000242020	RN7SL68P
ENSG00000242852	ZNF709
ENSG00000243469	RPL7P51
ENSG00000243680	RPL37P23
ENSG00000244436	RP11-428G5.1
ENSG00000244676	AL109761.5
ENSG00000245025	RP11-875O11.1
ENSG00000245385	RP11-334E6.10
ENSG00000245648	RP11-277P12.20
ENSG00000245748	RP11-367J11.2
ENSG00000246548	RP11-7F17.5
ENSG00000248243	RP11-93K22.13
ENSG00000248323	LUCAT1
ENSG00000248705	AC114812.10
ENSG00000249859	PVT1
ENSG00000250101	RP11-1252I4.2
ENSG00000250102	RP11-314N14.1
ENSG00000250155	CTD-2353F22.1
ENSG00000250321	RP11-478C6.4
ENSG00000250510	GPR162
ENSG00000250523	RP11-756P10.1
ENSG00000250790	RP11-46H11.3
ENSG00000250892	RP11-1365D11.1
ENSG00000251287	ALG1L2
ENSG00000251369	ZNF550
ENSG00000251965	RNA5SP208
ENSG00000252097	RNU6-346P
ENSG00000252278	RNU6-866P
ENSG00000252515	RNU6-1171P
ENSG00000252584	AC023050.1
ENSG00000253024	RNU6-1238P
ENSG00000253144	RP11-281O15.7
ENSG00000253293	HOXA10
ENSG00000253522	MIR146A
ENSG00000253737	KB-1460A1.3
ENSG00000253844	RP11-546K22.1
ENSG00000254004	ZNF260
ENSG00000254035	RP11-281O15.4
ENSG00000254165	RP11-503E24.2
ENSG00000254281	KB-1507C5.4
ENSG00000254415	SIGLEC14
ENSG00000254489	RP5-1024C24.1
ENSG00000254559	RP11-304M2.5
ENSG00000254812	RP11-661A12.12
ENSG00000254936	AF131215.3
ENSG00000255085	AF186192.5
ENSG00000255408	PCDHA3
ENSG00000256087	ZNF432
ENSG00000256269	HMBS
ENSG00000256294	ZNF225
ENSG00000257184	RP1-170O19.20
ENSG00000257242	C12orf79
ENSG00000257390	RP11-762I7.5
ENSG00000258515	RP11-203M5.7
ENSG00000258754	CTD-3049M7.1
ENSG00000258875	CTD-2547L24.3
ENSG00000258973	RP11-934B9.3
ENSG00000259143	CTD-2240H23.2
ENSG00000259375	RP11-815J21.2
ENSG00000259660	DNM1P47
ENSG00000260077	RP11-254F7.2
ENSG00000260112	CTC-543D15.1
ENSG00000260160	CTC-471J1.2
ENSG00000260193	RP11-83N9.5
ENSG00000260479	RP11-556H2.3
ENSG00000260778	MIR940
ENSG00000260876	RP11-345M22.1
ENSG00000260920	RP1-228H13.5
ENSG00000261055	RP11-195M16.3
ENSG00000261069	SNORD116-20
ENSG00000261159	RP11-723O4.9
ENSG00000261317	RP11-566K11.5
ENSG00000261392	RP11-473I1.6
ENSG00000261533	RP11-15N24.4
ENSG00000261546	CTD-2555A7.3
ENSG00000261790	AC005606.14
ENSG00000262001	DLGAP1-AS2
ENSG00000262223	RP11-1055B8.3
ENSG00000262296	RP11-55L4.1
ENSG00000262468	RP11-95P2.1
ENSG00000262554	LA16c-360H6.2
ENSG00000262692	CTD-3195I5.3
ENSG00000262703	RP11-485G7.6
ENSG00000262877	RP11-1055B8.4
ENSG00000262899	LA16c-360H6.3
ENSG00000263171	RP11-542C16.1
ENSG00000263612	AF186192.6
ENSG00000263628	MIR3155A
ENSG00000263683	RP4-777O23.1
ENSG00000264326	MIR4657
ENSG00000264386	MIR4513
ENSG00000265118	CTD-2370N5.3
ENSG00000265178	MIR4728
ENSG00000265185	SNORD3B-1
ENSG00000265396	MIR3128
ENSG00000265403	AC015884.1
ENSG00000265474	AC010761.9
ENSG00000265629	AC011897.1
ENSG00000265700	MIR4647
ENSG00000265798	RP11-271K11.5
ENSG00000265840	AC010761.10
ENSG00000265982	RP11-927P21.4
ENSG00000265987	RP11-16C1.3
ENSG00000266019	MIR3609
ENSG00000266581	MIR3166
ENSG00000266643	MIR3677
ENSG00000266913	CTC-548K16.2
ENSG00000267123	CTD-2357A8.3
ENSG00000267145	AC006116.14
ENSG00000267157	CTB-54O9.9
ENSG00000267174	CTC-510F12.4
ENSG00000267274	CTD-2006C1.12
ENSG00000267470	ZNF571-AS1
ENSG00000267565	CTC-559E9.8
ENSG00000267605	CTD-3220F14.1
ENSG00000267682	CTD-3220F14.2
ENSG00000267759	CTB-25B13.13
ENSG00000267764	RP11-484L8.1
ENSG00000267845	DKFZP434A062
ENSG00000267848	AL118506.1
ENSG00000268000	hsa-mir-150
ENSG00000268095	CTC-429C10.2
ENSG00000268157	AC010524.4
ENSG00000268201	CTD-3138B18.6
ENSG00000268355	AC006129.1
ENSG00000268361	L34079.2
ENSG00000268387	AL590714.1
ENSG00000268458	CTC-471J1.9
ENSG00000268475	CTC-435M10.6
ENSG00000268500	SIGLEC5
ENSG00000268681	COX6CP7
ENSG00000268731	CTD-2561J22.1
ENSG00000268785	RPL7P50
ENSG00000268816	CTD-3093M3.1
ENSG00000268858	C20ORF135
ENSG00000268863	AC135048.1
ENSG00000269001	ZNF818P
ENSG00000269069	CTC-471F3.5
ENSG00000269074	AC099344.1
ENSG00000269091	CTD-2126E3.3
ENSG00000269194	AC006942.4
ENSG00000269235	HCCAT3
ENSG00000269399	CTD-3222D19.7
ENSG00000269604	AC005523.2
ENSG00000269720	CTD-2521M24.5
ENSG00000269959	SPACA6P-AS
ENSG00000270049	RP11-297D21.4
ENSG00000270110	RP5-1139B12.4
ENSG00000270346	RP1-90J20.12
ENSG00000270402	CTC-412M14.5
ENSG00000270814	TMEM261P1
ENSG00000271754	RP3-337H4.9
ENSG00000271762	RP11-213H15.4
ENSG00000271820	RP5-894D12.5
ENSG00000271963	CTD-2140B24.6
ENSG00000272056	RP11-503P10.1
ENSG00000272233	RP11-503E24.3
ENSG00000272431	RP11-281O15.8
ENSG00000272540	XXbac-BPG252P9.9
ENSG00000272849	RP11-347I19.8
ENSG00000272885	RP11-2H3.6
ENSG00000273226	RP11-513M16.8
ENSG00000273318	AC018755.2
ENSG00000273443	RP11-54O7.18
ENSG00000273487	RP4-621B10.8

## Sheet: Macrophage-M.tb infection
Active to repress				Active to Bivalent				Bivalent to Repress				Bivalent to Active				Repress to Active				Repress to Bivalent
ENSG00000000003	TSPAN6			ENSG00000012779	ALOX5			ENSG00000007372	PAX6			ENSG00000001084	GCLC			ENSG00000003402	CFLAR			ENSG00000004948	CALCR
ENSG00000003056	M6PR			ENSG00000018408	WWTR1			ENSG00000008735	MAPK8IP2			ENSG00000004399	PLXND1			ENSG00000003987	MTMR7			ENSG00000020577	SAMD4A
ENSG00000004660	CAMKK1			ENSG00000036448	MYOM2			ENSG00000011332	DPF1			ENSG00000004455	AK2			ENSG00000005187	ACSM3			ENSG00000053524	MCF2L2
ENSG00000004777	ARHGAP33			ENSG00000039560	RAI14			ENSG00000028277	POU2F2			ENSG00000005884	ITGA3			ENSG00000007129	CEACAM21			ENSG00000069667	RORA
ENSG00000005801	ZNF195			ENSG00000050628	PTGER3			ENSG00000058335	RASGRF1			ENSG00000006740	ARHGAP44			ENSG00000013725	CD6			ENSG00000071242	RPS6KA2
ENSG00000005844	ITGAL			ENSG00000066032	CTNNA2			ENSG00000063660	GPC1			ENSG00000010626	LRRC23			ENSG00000018236	CNTN1			ENSG00000075043	KCNQ2
ENSG00000006016	CRLF1			ENSG00000067840	PDZD4			ENSG00000065371	ROPN1			ENSG00000012232	EXTL3			ENSG00000019144	PHLDB1			ENSG00000077942	FBLN1
ENSG00000006625	GGCT			ENSG00000079841	RIMS1			ENSG00000072195	SPEG			ENSG00000017373	SRCIN1			ENSG00000027869	SH2D2A			ENSG00000088386	SLC15A1
ENSG00000006747	SCIN			ENSG00000080493	SLC4A4			ENSG00000075461	CACNG4			ENSG00000020577	SAMD4A			ENSG00000040531	CTNS			ENSG00000090932	DLL3
ENSG00000007237	GAS7			ENSG00000081052	COL4A4			ENSG00000078401	EDN1			ENSG00000035664	DAPK2			ENSG00000042493	CAPG			ENSG00000104888	SLC17A7
ENSG00000007314	SCN4A			ENSG00000091409	ITGA6			ENSG00000082014	SMARCD3			ENSG00000036530	CYP46A1			ENSG00000048052	HDAC9			ENSG00000109794	FAM149A
ENSG00000007541	PIGQ			ENSG00000095203	EPB41L4B			ENSG00000084072	PPIE			ENSG00000038382	TRIO			ENSG00000049618	ARID1B			ENSG00000110148	CCKBR
ENSG00000008394	MGST1			ENSG00000096433	ITPR3			ENSG00000095752	IL11			ENSG00000041982	TNC			ENSG00000055208	TAB2			ENSG00000117322	CR2
ENSG00000008513	ST3GAL1			ENSG00000100473	COCH			ENSG00000099869	IGF2-AS			ENSG00000047365	ARAP2			ENSG00000058673	ZC3H11A			ENSG00000119508	NR4A3
ENSG00000010310	GIPR			ENSG00000101445	PPP1R16B			ENSG00000099889	ARVCF			ENSG00000047634	SCML1			ENSG00000068079	IFI35			ENSG00000121904	CSMD2
ENSG00000010319	SEMA3G			ENSG00000102924	CBLN1			ENSG00000100207	TCF20			ENSG00000054356	PTPRN			ENSG00000068784	SRBD1			ENSG00000128052	KDR
ENSG00000010671	BTK			ENSG00000103528	SYT17			ENSG00000100288	CHKB			ENSG00000054654	SYNE2			ENSG00000070214	SLC44A1			ENSG00000128602	SMO
ENSG00000012061	ERCC1			ENSG00000104714	ERICH1			ENSG00000100600	LGMN			ENSG00000055163	CYFIP2			ENSG00000071282	LMCD1			ENSG00000136848	DAB2IP
ENSG00000013374	NUB1			ENSG00000105650	PDE4C			ENSG00000101850	GPR143			ENSG00000056487	PHF21B			ENSG00000074660	SCARF1			ENSG00000138696	BMPR1B
ENSG00000013573	DDX11			ENSG00000106066	CPVL			ENSG00000101871	MID1			ENSG00000057294	PKP2			ENSG00000076258	FMO4			ENSG00000140557	ST8SIA2
ENSG00000014257	ACPP			ENSG00000106069	CHN2			ENSG00000102003	SYP			ENSG00000060656	PTPRU			ENSG00000077063	CTTNBP2			ENSG00000141404	GNAL
ENSG00000019549	SNAI2			ENSG00000106278	PTPRZ1			ENSG00000104808	DHDH			ENSG00000063660	GPC1			ENSG00000079435	LIPE			ENSG00000142698	C1orf94
ENSG00000022355	GABRA1			ENSG00000107859	PITX3			ENSG00000104936	DMPK			ENSG00000064218	DMRT3			ENSG00000079616	KIF22			ENSG00000144152	FBLN7
ENSG00000023697	DERA			ENSG00000108511	HOXB6			ENSG00000104972	LILRB1			ENSG00000064309	CDON			ENSG00000079999	KEAP1			ENSG00000145832	SLC25A48
ENSG00000023902	PLEKHO1			ENSG00000109452	INPP4B			ENSG00000105409	ATP1A3			ENSG00000065675	PRKCQ			ENSG00000081721	DUSP12			ENSG00000146122	DAAM2
ENSG00000026950	BTN3A1			ENSG00000110723	EXPH5			ENSG00000105642	KCNN1			ENSG00000065989	PDE4A			ENSG00000082074	FYB			ENSG00000147526	TACC1
ENSG00000033100	CHPF2			ENSG00000115468	EFHD1			ENSG00000105664	COMP			ENSG00000066032	CTNNA2			ENSG00000084070	SMAP2			ENSG00000157613	CREB3L1
ENSG00000038274	MAT2B			ENSG00000115504	EHBP1			ENSG00000105696	TMEM59L			ENSG00000066923	STAG3			ENSG00000084112	SSH1			ENSG00000161835	GRASP
ENSG00000047249	ATP6V1H			ENSG00000115507	OTX1			ENSG00000106236	NPTX2			ENSG00000067141	NEO1			ENSG00000085117	CD82			ENSG00000164764	SBSPON
ENSG00000047648	ARHGAP6			ENSG00000116132	PRRX1			ENSG00000108309	RUNDC3A			ENSG00000070159	PTPN3			ENSG00000085511	MAP3K4			ENSG00000165548	TMEM63C
ENSG00000048052	HDAC9			ENSG00000117598	LPPR5			ENSG00000108370	RGS9			ENSG00000070182	SPTB			ENSG00000085831	TTC39A			ENSG00000166402	TUB
ENSG00000048540	LMO3			ENSG00000119630	PGF			ENSG00000108821	COL1A1			ENSG00000070614	NDST1			ENSG00000096070	BRPF3			ENSG00000167861	HID1
ENSG00000050405	LIMA1			ENSG00000119681	LTBP2			ENSG00000109501	WFS1			ENSG00000070731	ST6GALNAC2			ENSG00000099968	BCL2L13			ENSG00000168267	PTF1A
ENSG00000051523	CYBA			ENSG00000120075	HOXB5			ENSG00000110881	ASIC1			ENSG00000073712	FERMT2			ENSG00000100225	FBXO7			ENSG00000169862	CTNND2
ENSG00000056097	ZFR			ENSG00000120093	HOXB3			ENSG00000111186	WNT5B			ENSG00000073861	TBX21			ENSG00000100243	CYB5R3			ENSG00000170703	TTLL6
ENSG00000057657	PRDM1			ENSG00000124374	PAIP2B			ENSG00000113196	HAND1			ENSG00000074416	MGLL			ENSG00000100503	NIN			ENSG00000171094	ALK
ENSG00000060140	STYK1			ENSG00000124772	CPNE5			ENSG00000113430	IRX4			ENSG00000076356	PLXNA2			ENSG00000100926	TM9SF1			ENSG00000171303	KCNK3
ENSG00000064201	TSPAN32			ENSG00000129195	FAM64A			ENSG00000115138	POMC			ENSG00000076826	CAMSAP3			ENSG00000101000	PROCR			ENSG00000172238	ATOH1
ENSG00000064666	CNN2			ENSG00000129422	MTUS1			ENSG00000116580	GON4L			ENSG00000076864	RAP1GAP			ENSG00000101265	RASSF2			ENSG00000173068	BNC2
ENSG00000064763	FAR2			ENSG00000130702	LAMA5			ENSG00000116983	HPCAL4			ENSG00000077092	RARB			ENSG00000101665	SMAD7			ENSG00000177551	NHLH2
ENSG00000064932	SBNO2			ENSG00000131477	RAMP2			ENSG00000120057	SFRP5			ENSG00000079931	MOXD1			ENSG00000101938	CHRDL1			ENSG00000178171	AMER3
ENSG00000065054	SLC9A3R2			ENSG00000133019	CHRM3			ENSG00000120068	HOXB8			ENSG00000080572	PIH1D3			ENSG00000102096	PIM2			ENSG00000179008	C14orf39
ENSG00000066044	ELAVL1			ENSG00000133878	DUSP26			ENSG00000121905	HPCA			ENSG00000082014	SMARCD3			ENSG00000103811	CTSH			ENSG00000180287	PLD5
ENSG00000066382	MPPED2			ENSG00000133958	UNC79			ENSG00000124493	GRM4			ENSG00000082397	EPB41L3			ENSG00000104321	TRPA1			ENSG00000185155	MIXL1
ENSG00000068323	TFE3			ENSG00000134508	CABLES1			ENSG00000124615	MOCS1			ENSG00000082438	COBLL1			ENSG00000104695	PPP2CB			ENSG00000186469	GNG2
ENSG00000068971	PPP2R5B			ENSG00000135333	EPHA7			ENSG00000124831	LRRFIP1			ENSG00000082512	TRAF5			ENSG00000104883	PEX11G			ENSG00000203877	RIPPLY2
ENSG00000069702	TGFBR3			ENSG00000135390	ATP5G2			ENSG00000125084	WNT1			ENSG00000083067	TRPM3			ENSG00000105808	RASA4			ENSG00000205301	RP11-542P2.1
ENSG00000071553	ATP6AP1			ENSG00000136114	THSD1			ENSG00000125492	BARHL1			ENSG00000084764	MAPRE3			ENSG00000105821	DNAJC2			ENSG00000225472	RP11-120J1.1
ENSG00000072310	SREBF1			ENSG00000136856	SLC2A8			ENSG00000129116	PALLD			ENSG00000085741	WNT11			ENSG00000107566	ERLIN1			ENSG00000225930	AC026150.5
ENSG00000073331	ALPK1			ENSG00000136883	KIF12			ENSG00000129244	ATP1B2			ENSG00000088256	GNA11			ENSG00000108592	FTSJ3			ENSG00000228526	RP3-510D11.1
ENSG00000073464	CLCN4			ENSG00000137819	PAQR5			ENSG00000129990	SYT5			ENSG00000088367	EPB41L1			ENSG00000110944	IL23A			ENSG00000229797	AC140481.8
ENSG00000073737	DHRS9			ENSG00000138083	SIX3			ENSG00000130477	UNC13A			ENSG00000088387	DOCK9			ENSG00000111725	PRKAB1			ENSG00000233721	RP11-205K6.1
ENSG00000074181	NOTCH3			ENSG00000138678	AGPAT9			ENSG00000130540	SULT4A1			ENSG00000088881	EBF4			ENSG00000111879	FAM184A			ENSG00000234779	RP11-62F24.2
ENSG00000074219	TEAD2			ENSG00000139352	ASCL1			ENSG00000130829	DUSP9			ENSG00000088882	CPXM1			ENSG00000112029	FBXO5			ENSG00000239513	RP11-2A4.3
ENSG00000074964	ARHGEF10L			ENSG00000141449	GREB1L			ENSG00000131016	AKAP12			ENSG00000088992	TESC			ENSG00000112561	TFEB			ENSG00000249599	RP11-168E14.1
ENSG00000075240	GRAMD4			ENSG00000141622	RNF165			ENSG00000131037	EPS8L1			ENSG00000090530	LEPREL1			ENSG00000112701	SENP6			ENSG00000251670	CTD-2532K18.1
ENSG00000075420	FNDC3B			ENSG00000142871	CYR61			ENSG00000131042	LILRB2			ENSG00000090661	CERS4			ENSG00000112706	IMPG1			ENSG00000257829	RP11-845M18.6
ENSG00000075624	ACTB			ENSG00000143786	CNIH3			ENSG00000132702	HAPLN2			ENSG00000091592	NLRP1			ENSG00000113387	SUB1			ENSG00000258670	RP11-1042B17.3
ENSG00000076067	RBMS2			ENSG00000143816	WNT9A			ENSG00000132718	SYT11			ENSG00000092969	TGFB2			ENSG00000113643	RARS			ENSG00000258986	TMEM179
ENSG00000076604	TRAF4			ENSG00000144331	ZNF385B			ENSG00000134853	PDGFRA			ENSG00000095397	DFNB31			ENSG00000113946	CLDN16			ENSG00000259439	RP11-89K21.1
ENSG00000076944	STXBP2			ENSG00000144619	CNTN4			ENSG00000134871	COL4A2			ENSG00000099139	PCSK5			ENSG00000114547	ROPN1B			ENSG00000260253	RP4-676L2.1
ENSG00000079393	DUSP13			ENSG00000145147	SLIT2			ENSG00000138136	LBX1			ENSG00000099256	PRTFDC1			ENSG00000114757	PEX5L			ENSG00000260548	RP6-24A23.6
ENSG00000080709	KCNN2			ENSG00000146205	ANO7			ENSG00000139515	PDX1			ENSG00000099822	HCN2			ENSG00000114812	VIPR1			ENSG00000266890	MIR4634
ENSG00000082458	DLG3			ENSG00000151789	ZNF385D			ENSG00000142494	SLC47A1			ENSG00000099889	ARVCF			ENSG00000115009	CCL20			ENSG00000267568	RP11-87G24.3
ENSG00000082641	NFE2L1			ENSG00000152208	GRID2			ENSG00000143320	CRABP2			ENSG00000099953	MMP11			ENSG00000115073	ACTR1B
ENSG00000082898	XPO1			ENSG00000152284	TCF7L1			ENSG00000143429	AC027612.6			ENSG00000100003	SEC14L2			ENSG00000115216	NRBP1
ENSG00000084110	HAL			ENSG00000154655	L3MBTL4			ENSG00000143867	OSR1			ENSG00000100276	RASL10A			ENSG00000116584	ARHGEF2
ENSG00000085224	ATRX			ENSG00000154721	JAM2			ENSG00000145423	SFRP2			ENSG00000100285	NEFH			ENSG00000116661	FBXO2
ENSG00000087495	PHACTR3			ENSG00000154734	ADAMTS1			ENSG00000146950	SHROOM2			ENSG00000100599	RIN3			ENSG00000116701	NCF2
ENSG00000087842	PIR			ENSG00000154736	ADAMTS5			ENSG00000147571	CRH			ENSG00000100852	ARHGAP5			ENSG00000117228	GBP1
ENSG00000088038	CNOT3			ENSG00000158528	PPP1R9A			ENSG00000147596	PRDM14			ENSG00000101331	CCM2L			ENSG00000117592	PRDX6
ENSG00000089820	ARHGAP4			ENSG00000162745	OLFML2B			ENSG00000150394	CDH8			ENSG00000101955	SRPX			ENSG00000117791	MARC2
ENSG00000090104	RGS1			ENSG00000162951	LRRTM1			ENSG00000151572	ANO4			ENSG00000102038	SMARCA1			ENSG00000118257	NRP2
ENSG00000090339	ICAM1			ENSG00000164588	HCN1			ENSG00000152076	CCDC74B			ENSG00000103089	FA2H			ENSG00000118276	B4GALT6
ENSG00000090372	STRN4			ENSG00000164761	TNFRSF11B			ENSG00000154342	WNT3A			ENSG00000103227	LMF1			ENSG00000118503	TNFAIP3
ENSG00000090554	FLT3LG			ENSG00000165795	NDRG2			ENSG00000155093	PTPRN2			ENSG00000103534	TMC5			ENSG00000118620	ZNF430
ENSG00000090659	CD209			ENSG00000165801	ARHGEF40			ENSG00000159708	LRRC36			ENSG00000103647	CORO2B			ENSG00000119125	GDA
ENSG00000091073	DTX2			ENSG00000165996	PTPLA			ENSG00000159958	TNFRSF13C			ENSG00000103742	IGDCC4			ENSG00000119718	EIF2B2
ENSG00000092068	SLC7A8			ENSG00000166831	RBPMS2			ENSG00000160191	PDE9A			ENSG00000104290	FZD3			ENSG00000119772	DNMT3A
ENSG00000092094	OSGEP			ENSG00000169031	COL4A3			ENSG00000160439	RDH13			ENSG00000104435	STMN2			ENSG00000119866	BCL11A
ENSG00000092200	RPGRIP1			ENSG00000169330	KIAA1024			ENSG00000160716	CHRNB2			ENSG00000104974	LILRA1			ENSG00000120329	SLC25A2
ENSG00000092607	TBX15			ENSG00000169604	ANTXR1			ENSG00000160963	COL26A1			ENSG00000105048	TNNT1			ENSG00000120437	ACAT2
ENSG00000092758	COL9A3			ENSG00000169851	PCDH7			ENSG00000161082	CELF5			ENSG00000105186	ANKRD27			ENSG00000120896	SORBS3
ENSG00000092929	UNC13D			ENSG00000169925	BRD3			ENSG00000161270	NPHS1			ENSG00000105401	CDC37			ENSG00000120899	PTK2B
ENSG00000095066	HOOK2			ENSG00000170500	LONRF2			ENSG00000161905	ALOX15			ENSG00000105409	ATP1A3			ENSG00000121207	LRAT
ENSG00000095303	PTGS1			ENSG00000170775	GPR37			ENSG00000163032	VSNL1			ENSG00000105438	KDELR1			ENSG00000121316	PLBD1
ENSG00000095370	SH2D3C			ENSG00000170791	CHCHD7			ENSG00000164458	T			ENSG00000105855	ITGB8			ENSG00000121361	KCNJ8
ENSG00000099338	CATSPERG			ENSG00000171517	LPAR3			ENSG00000165566	AMER2			ENSG00000105926	MPP6			ENSG00000121858	TNFSF10
ENSG00000099377	HSD3B7			ENSG00000171551	ECEL1			ENSG00000165973	NELL1			ENSG00000106034	CPED1			ENSG00000122299	ZC3H7A
ENSG00000099625	C19orf26			ENSG00000171759	PAH			ENSG00000166341	DCHS1			ENSG00000106123	EPHB6			ENSG00000122490	PQLC1
ENSG00000099804	CDC34			ENSG00000173083	HPSE			ENSG00000166793	YPEL4			ENSG00000107242	PIP5K1B			ENSG00000122643	NT5C3A
ENSG00000099817	POLR2E			ENSG00000173376	NDNF			ENSG00000166828	SCNN1G			ENSG00000107249	GLIS3			ENSG00000124201	ZNFX1
ENSG00000099875	MKNK2			ENSG00000174473	GALNTL6			ENSG00000167178	ISLR2			ENSG00000107438	PDLIM1			ENSG00000125538	IL1B
ENSG00000099949	LZTR1			ENSG00000175445	LPL			ENSG00000167244	IGF2			ENSG00000107954	NEURL1			ENSG00000126353	CCR7
ENSG00000100060	MFNG			ENSG00000179088	C12orf42			ENSG00000167414	GNG8			ENSG00000107984	DKK1			ENSG00000127191	TRAF2
ENSG00000100099	HPS4			ENSG00000181195	PENK			ENSG00000167749	KLK4			ENSG00000108270	AATF			ENSG00000127561	SYNGR3
ENSG00000100242	SUN2			ENSG00000181201	HIST3H2BA			ENSG00000167992	VWCE			ENSG00000109158	GABRA4			ENSG00000128284	APOL3
ENSG00000100299	ARSA			ENSG00000181656	GPR88			ENSG00000168309	FAM107A			ENSG00000109339	MAPK10			ENSG00000129055	ANAPC13
ENSG00000100307	CBX7			ENSG00000181690	PLAG1			ENSG00000168676	KCTD19			ENSG00000109762	SNX25			ENSG00000130589	HELZ2
ENSG00000100354	TNRC6B			ENSG00000182742	HOXB4			ENSG00000168993	CPLX1			ENSG00000110328	GALNT18			ENSG00000130749	ZC3H4
ENSG00000100380	ST13			ENSG00000182747	SLC35D3			ENSG00000169418	NPR1			ENSG00000110400	PVRL1			ENSG00000130829	DUSP9
ENSG00000100448	CTSG			ENSG00000182963	GJC1			ENSG00000169894	MUC3A			ENSG00000110429	FBXO3			ENSG00000131127	ZNF141
ENSG00000100523	DDHD1			ENSG00000183762	KREMEN1			ENSG00000170801	HTRA3			ENSG00000110675	ELMOD1			ENSG00000131873	CHSY1
ENSG00000100600	LGMN			ENSG00000183780	SLC35F3			ENSG00000170989	S1PR1			ENSG00000110811	LEPREL2			ENSG00000132669	RIN2
ENSG00000100628	ASB2			ENSG00000184254	ALDH1A3			ENSG00000171680	PLEKHG5			ENSG00000110881	ASIC1			ENSG00000132872	SYT4
ENSG00000100650	SRSF5			ENSG00000184408	KCND2			ENSG00000172409	CLP1			ENSG00000111481	COPZ1			ENSG00000133805	AMPD3
ENSG00000100767	PAPLN			ENSG00000185044	RP11-435B5.4			ENSG00000173227	SYT12			ENSG00000111490	TBC1D30			ENSG00000133818	RRAS2
ENSG00000100979	PLTP			ENSG00000185532	PRKG1			ENSG00000173302	GPR148			ENSG00000111674	ENO2			ENSG00000134262	AP4B1
ENSG00000101040	ZMYND8			ENSG00000185565	LSAMP			ENSG00000173673	HES3			ENSG00000112182	BACH2			ENSG00000134326	CMPK2
ENSG00000101222	SPEF1			ENSG00000186867	QRFPR			ENSG00000173805	HAP1			ENSG00000112379	KIAA1244			ENSG00000134644	PUM1
ENSG00000101247	NDUFAF5			ENSG00000196167	COLCA1			ENSG00000174562	KLK15			ENSG00000112584	FAM120B			ENSG00000134882	UBAC2
ENSG00000101294	HM13			ENSG00000196361	ELAVL3			ENSG00000176678	FOXL1			ENSG00000112699	GMDS			ENSG00000134970	TMED7
ENSG00000101307	SIRPB1			ENSG00000196628	TCF4			ENSG00000177106	EPS8L2			ENSG00000113319	RASGRF2			ENSG00000135111	TBX3
ENSG00000101349	PAK7			ENSG00000197261	C6orf141			ENSG00000177335	C8orf31			ENSG00000114251	WNT5A			ENSG00000135362	PRR5L
ENSG00000101405	OXT			ENSG00000197291	RAMP2-AS1			ENSG00000177468	OLIG3			ENSG00000114353	GNAI2			ENSG00000135549	PKIB
ENSG00000101811	CSTF2			ENSG00000197444	OGDHL			ENSG00000178233	TMEM151B			ENSG00000114646	CSPG5			ENSG00000135905	DOCK10
ENSG00000101888	NXT2			ENSG00000198535	C2CD4A			ENSG00000179148	ALOXE3			ENSG00000114812	VIPR1			ENSG00000136205	TNS3
ENSG00000101898	RP3-324O17.4			ENSG00000198756	COLGALT2			ENSG00000179477	ALOX12B			ENSG00000114923	SLC4A3			ENSG00000138166	DUSP5
ENSG00000101966	XIAP			ENSG00000199572	RNA5SP174			ENSG00000180914	OXTR			ENSG00000114948	ADAM23			ENSG00000138621	PPCDC
ENSG00000102158	MAGT1			ENSG00000203727	SAMD5			ENSG00000181409	AATK			ENSG00000115041	KCNIP3			ENSG00000139132	FGD4
ENSG00000102225	CDK16			ENSG00000206538	VGLL3			ENSG00000181965	NEUROG1			ENSG00000115295	CLIP4			ENSG00000139722	VPS37B
ENSG00000102349	KLF8			ENSG00000214290	COLCA2			ENSG00000182040	USH1G			ENSG00000115361	ACADL			ENSG00000140987	ZSCAN32
ENSG00000103154	NECAB2			ENSG00000221240	MIR1258			ENSG00000183034	OTOP2			ENSG00000115457	IGFBP2			ENSG00000141568	FOXK2
ENSG00000103222	ABCC1			ENSG00000222999	AC105247.1			ENSG00000183405	RPS7P1			ENSG00000115604	IL18R1			ENSG00000143119	CD53
ENSG00000103274	NUBP1			ENSG00000224807	DUX4L9			ENSG00000185519	FAM131C			ENSG00000116032	GRIN3B			ENSG00000143190	POU2F1
ENSG00000103316	CRYM			ENSG00000225206	MIR137HG			ENSG00000187498	COL4A1			ENSG00000116106	EPHA4			ENSG00000143226	FCGR2A
ENSG00000103507	BCKDK			ENSG00000225554	RP11-527D7.1			ENSG00000187566	NHLRC1			ENSG00000116117	PARD3B			ENSG00000143514	TP53BP2
ENSG00000103549	RNF40			ENSG00000226963	AC078883.4			ENSG00000187902	SHISA7			ENSG00000116525	TRIM62			ENSG00000143761	ARF1
ENSG00000103653	CSK			ENSG00000230992	FAM201B			ENSG00000196337	CGB7			ENSG00000116675	DNAJC6			ENSG00000143774	GUK1
ENSG00000103876	FAH			ENSG00000231550	PTCHD3P2			ENSG00000197093	GAL3ST4			ENSG00000117115	PADI2			ENSG00000144406	UNC80
ENSG00000104055	TGM5			ENSG00000231609	AC009501.4			ENSG00000197753	LHFPL5			ENSG00000117298	ECE1			ENSG00000144712	CAND2
ENSG00000104522	TSTA3			ENSG00000232825	RP5-896L10.1			ENSG00000198915	RASGEF1A			ENSG00000117519	CNN3			ENSG00000145391	SETD7
ENSG00000104901	DKKL1			ENSG00000233087	AC073869.1			ENSG00000204121	AC068134.5			ENSG00000118246	FASTKD2			ENSG00000146192	FGD2
ENSG00000104946	TBC1D17			ENSG00000233101	HOXB-AS3			ENSG00000204131	NHSL2			ENSG00000118804	FAM47E-STBD1			ENSG00000147684	NDUFB9
ENSG00000105146	AURKC			ENSG00000233384	RP11-100E13.1			ENSG00000204393	RP11-410N8.4			ENSG00000119508	NR4A3			ENSG00000148180	GSN
ENSG00000105364	MRPL4			ENSG00000235079	ZRANB2-AS1			ENSG00000204869	IGFL4			ENSG00000119514	GALNT12			ENSG00000148334	PTGES2
ENSG00000105371	ICAM4			ENSG00000236502	SIX3-AS1			ENSG00000206177	HBM			ENSG00000120088	CRHR1			ENSG00000148832	PAOX
ENSG00000105443	CYTH2			ENSG00000239268	RP11-384F7.2			ENSG00000206178	HBZP1			ENSG00000120149	MSX2			ENSG00000149564	ESAM
ENSG00000105492	SIGLEC6			ENSG00000241313	WWTR1-AS1			ENSG00000207598	MIR124-3			ENSG00000120659	TNFSF11			ENSG00000150433	TMEM218
ENSG00000105520	DKFZP761J1410			ENSG00000244588	RAD21L1			ENSG00000207611	MIR149			ENSG00000120832	MTERFD3			ENSG00000151726	ACSL1
ENSG00000105576	TNPO2			ENSG00000248511	RP11-9B6.1			ENSG00000207805	MIR483			ENSG00000120885	CLU			ENSG00000151914	DST
ENSG00000105618	PRPF31			ENSG00000250234	CTD-2024P10.1			ENSG00000211517	MIR671			ENSG00000120913	PDLIM2			ENSG00000153339	TRAPPC8
ENSG00000105647	PIK3R2			ENSG00000250344	RP11-647P12.1			ENSG00000213626	LBH			ENSG00000120915	EPHX2			ENSG00000154451	GBP5
ENSG00000105726	ATP13A1			ENSG00000253304	TMEM200B			ENSG00000214295	FOXO1B			ENSG00000121753	BAI2			ENSG00000155363	MOV10
ENSG00000105808	RASA4			ENSG00000253853	GS1-57L11.1			ENSG00000214330	ABCD1P5			ENSG00000122824	NUDT10			ENSG00000155629	PIK3AP1
ENSG00000105967	TFEC			ENSG00000253944	RP11-156K13.1			ENSG00000214546	AC087491.2			ENSG00000123096	SSPN			ENSG00000155926	SLA
ENSG00000106327	TFR2			ENSG00000254254	RP11-17A4.2			ENSG00000214999	AC129492.6			ENSG00000123384	LRP1			ENSG00000156030	ELMSAN1
ENSG00000106397	PLOD3			ENSG00000254319	RP11-134O21.1			ENSG00000218416	AC110619.2			ENSG00000123405	NFE2			ENSG00000156219	ART3
ENSG00000106992	AK1			ENSG00000257178	MIR10A			ENSG00000219435	TEX40			ENSG00000123836	PFKFB2			ENSG00000157326	DHRS4
ENSG00000108352	RAPGEFL1			ENSG00000260584	RP11-1166P10.7			ENSG00000225156	AC012354.6			ENSG00000124249	KCNK15			ENSG00000157557	ETS2
ENSG00000108666	C17orf75			ENSG00000261634	RP11-352D13.6			ENSG00000225180	AATK-AS1			ENSG00000124299	PEPD			ENSG00000157601	MX1
ENSG00000108669	CYTH1			ENSG00000265984	RP11-699A5.2			ENSG00000225914	XXbac-BPG154L12.4			ENSG00000124593	PRICKLE4			ENSG00000157617	C2CD2
ENSG00000108771	DHX58			ENSG00000266963	AC005625.1			ENSG00000225938	RP4-575N6.4			ENSG00000125266	EFNB2			ENSG00000157823	AP3S2
ENSG00000108819	PPP1R9B			ENSG00000267325	RP11-397A16.2			ENSG00000225946	RP11-395B7.2			ENSG00000125285	SOX21			ENSG00000157978	LDLRAP1
ENSG00000108852	MPP2			ENSG00000267605	CTD-3220F14.1			ENSG00000225950	NTF4			ENSG00000125384	PTGER2			ENSG00000158517	NCF1
ENSG00000109321	AREG			ENSG00000271707	ATP1B3P1			ENSG00000227128	LBX1-AS1			ENSG00000125744	RTN2			ENSG00000158856	DMTN
ENSG00000109452	INPP4B							ENSG00000227308	AC009502.4			ENSG00000125816	NKX2-4			ENSG00000159202	UBE2Z
ENSG00000110844	PRPF40B							ENSG00000227365	AC008060.5			ENSG00000125850	OVOL2			ENSG00000159788	RGS12
ENSG00000111077	TENC1							ENSG00000230873	STMND1			ENSG00000125869	LAMP5			ENSG00000159842	ABR
ENSG00000111196	MAGOHB							ENSG00000231802	AC009502.1			ENSG00000125878	TCF15			ENSG00000159915	ZNF233
ENSG00000111424	VDR							ENSG00000231806	PCAT7			ENSG00000126822	PLEKHG3			ENSG00000160013	PTGIR
ENSG00000111642	CHD4							ENSG00000235013	COX20P2			ENSG00000127152	BCL11B			ENSG00000160201	U2AF1
ENSG00000111644	ACRBP							ENSG00000235024	AC097468.7			ENSG00000127580	WDR24			ENSG00000160741	CRTC2
ENSG00000111652	COPS7A							ENSG00000236279	CLEC2L			ENSG00000127603	MACF1			ENSG00000161609	CCDC155
ENSG00000111801	BTN3A3							ENSG00000237087	AC068134.6			ENSG00000127824	TUBA4A			ENSG00000161681	SHANK1
ENSG00000111859	NEDD9							ENSG00000237341	SYP-AS1			ENSG00000127863	TNFRSF19			ENSG00000162086	ZNF75A
ENSG00000112759	SLC29A1							ENSG00000242732	RGAG4			ENSG00000128271	ADORA2A			ENSG00000162624	LHX8
ENSG00000112799	LY86							ENSG00000242943	NKAIN1P1			ENSG00000128342	LIF			ENSG00000163121	NEURL3
ENSG00000113262	GRM6							ENSG00000246627	CACNA1C-AS1			ENSG00000128567	PODXL			ENSG00000163347	CLDN1
ENSG00000113272	THG1L							ENSG00000247381	PDX1-AS1			ENSG00000128872	TMOD2			ENSG00000163597	SNHG16
ENSG00000113758	DBN1							ENSG00000248345	RP11-262D11.1			ENSG00000129159	KCNC1			ENSG00000163644	PPM1K
ENSG00000113810	SMC4							ENSG00000248540	RP11-247C2.2			ENSG00000129295	LRRC6			ENSG00000163975	MFI2
ENSG00000114279	FGF12							ENSG00000249116	CTD-2194D22.3			ENSG00000130720	FIBCD1			ENSG00000164011	ZNF691
ENSG00000114353	GNAI2							ENSG00000249131	CTB-35F21.2			ENSG00000131015	ULBP2			ENSG00000164093	PITX2
ENSG00000114859	CLCN2							ENSG00000252628	RNU6-453P			ENSG00000131044	TTLL9			ENSG00000164440	TXLNB
ENSG00000115221	ITGB6							ENSG00000253230	LINC00599			ENSG00000131188	PRR7			ENSG00000164674	SYTL3
ENSG00000115718	PROC							ENSG00000254602	AP000662.4			ENSG00000131242	RAB11FIP4			ENSG00000164904	ALDH7A1
ENSG00000116014	KISS1R							ENSG00000254906	RP11-701I24.3			ENSG00000133116	KL			ENSG00000164916	FOXK1
ENSG00000116017	ARID3A							ENSG00000257346	RP11-386G11.8			ENSG00000133937	GSC			ENSG00000164972	C9orf24
ENSG00000116584	ARHGEF2							ENSG00000257389	RP11-153F5.3			ENSG00000134202	GSTM3			ENSG00000165406	2018-03-08
ENSG00000116670	MAD2L2							ENSG00000264703	MIR4752			ENSG00000134247	PTGFRN			ENSG00000165516	KLHDC2
ENSG00000117114	LPHN2							ENSG00000264799	AC009892.1			ENSG00000134363	FST			ENSG00000165672	PRDX3
ENSG00000117305	HMGCL							ENSG00000265466	AL583842.2			ENSG00000134504	KCTD1			ENSG00000166002	SMCO4
ENSG00000117676	RPS6KA1							ENSG00000266778	hsa-mir-548ba			ENSG00000134595	SOX3			ENSG00000166428	PLD4
ENSG00000118492	ADGB							ENSG00000267472	LOC440461			ENSG00000134668	SPOCD1			ENSG00000166507	NDST2
ENSG00000118507	AKAP7							ENSG00000267659	RP11-118B18.1			ENSG00000135074	ADAM19			ENSG00000166743	ACSM1
ENSG00000119042	SATB2							ENSG00000267750	AC003102.3			ENSG00000135362	PRR5L			ENSG00000166888	STAT6
ENSG00000119185	ITGB1BP1							ENSG00000268108	CTB-60B18.12			ENSG00000135519	KCNH3			ENSG00000166949	SMAD3
ENSG00000119321	FKBP15							ENSG00000268287	CTB-60B18.18			ENSG00000135622	SEMA4F			ENSG00000167460	TPM4
ENSG00000119397	CNTRL							ENSG00000272442	RP11-444E17.6			ENSG00000135625	EGR4			ENSG00000167522	ANKRD11
ENSG00000119403	PHF19							ENSG00000272661	RP4-548D19.3			ENSG00000135698	MPHOSPH6			ENSG00000167562	ZNF701
ENSG00000119408	NEK6											ENSG00000135723	FHOD1			ENSG00000167601	AXL
ENSG00000119487	MAPKAP1											ENSG00000135740	SLC9A5			ENSG00000167766	ZNF83
ENSG00000120280	CXorf21											ENSG00000135916	ITM2C			ENSG00000168214	RBPJ
ENSG00000120690	ELF1											ENSG00000136026	CKAP4			ENSG00000168710	AHCYL1
ENSG00000121413	ZSCAN18											ENSG00000136040	PLXNC1			ENSG00000168734	PKIG
ENSG00000121552	CSTA											ENSG00000136378	ADAMTS7			ENSG00000168916	ZNF608
ENSG00000121764	HCRTR1											ENSG00000136848	DAB2IP			ENSG00000169064	ZBBX
ENSG00000121871	SLITRK3											ENSG00000137098	SPAG8			ENSG00000170458	CD14
ENSG00000122026	RPL21											ENSG00000137103	TMEM8B			ENSG00000170776	AKAP13
ENSG00000122085	MTERFD2											ENSG00000137133	HINT2			ENSG00000170791	CHCHD7
ENSG00000122223	CD244											ENSG00000137142	IGFBPL1			ENSG00000171045	TSNARE1
ENSG00000122386	ZNF205											ENSG00000137177	KIF13A			ENSG00000171509	RXFP1
ENSG00000122565	CBX3											ENSG00000137218	FRS3			ENSG00000172590	MRPL52
ENSG00000122566	HNRNPA2B1											ENSG00000137266	SLC22A23			ENSG00000172965	MIR4435-1HG
ENSG00000122674	CCZ1											ENSG00000137460	FHDC1			ENSG00000172977	KAT5
ENSG00000122877	EGR2											ENSG00000137507	LRRC32			ENSG00000173209	AHSA2
ENSG00000123131	PRDX4											ENSG00000137642	SORL1			ENSG00000173535	TNFRSF10C
ENSG00000123374	CDK2											ENSG00000137727	ARHGAP20			ENSG00000173559	NABP1
ENSG00000123562	MORF4L2											ENSG00000137821	LRRC49			ENSG00000174125	TLR1
ENSG00000123576	ESX1											ENSG00000137878	GCOM1			ENSG00000174652	ZNF266
ENSG00000123612	ACVR1C											ENSG00000138134	STAMBPL1			ENSG00000175356	SCUBE2
ENSG00000123643	SLC36A1											ENSG00000138193	PLCE1			ENSG00000175643	RMI2
ENSG00000123870	ZNF137P											ENSG00000138316	ADAMTS14			ENSG00000176155	CCDC57
ENSG00000123892	RAB38											ENSG00000138400	MDH1B			ENSG00000176444	CLK2
ENSG00000124006	OBSL1											ENSG00000138411	HECW2			ENSG00000176490	DIRAS1
ENSG00000124019	FAM124B											ENSG00000138741	TRPC3			ENSG00000176658	MYO1D
ENSG00000124224	PPP4R1L											ENSG00000139132	FGD4			ENSG00000178127	NDUFV2
ENSG00000125170	DOK4											ENSG00000139445	FOXN4			ENSG00000178222	RNF212
ENSG00000125962	ARMCX5											ENSG00000139546	TARBP2			ENSG00000178386	ZNF223
ENSG00000126012	KDM5C											ENSG00000139625	MAP3K12			ENSG00000181031	RPH3AL
ENSG00000126653	NSRP1											ENSG00000139926	FRMD6			ENSG00000181666	HKR1
ENSG00000126860	EVI2A											ENSG00000140280	LYSMD2			ENSG00000181896	ZNF101
ENSG00000126883	NUP214											ENSG00000140416	TPM1			ENSG00000182179	UBA7
ENSG00000126953	TIMM8A											ENSG00000140465	CYP1A1			ENSG00000182899	RPL35A
ENSG00000127054	CPSF3L											ENSG00000140488	CELF6			ENSG00000183486	MX2
ENSG00000127324	TSPAN8											ENSG00000140995	DEF8			ENSG00000184428	TOP1MT
ENSG00000127481	UBR4											ENSG00000141540	TTYH2			ENSG00000184515	BEX5
ENSG00000127533	F2RL3											ENSG00000141570	CBX8			ENSG00000184588	PDE4B
ENSG00000127564	PKMYT1											ENSG00000141873	SLC39A3			ENSG00000184792	OSBP2
ENSG00000127580	WDR24											ENSG00000142235	LMTK3			ENSG00000184922	FMNL1
ENSG00000127954	STEAP4											ENSG00000142279	WTIP			ENSG00000185053	SGCZ
ENSG00000128040	SPINK2											ENSG00000142538	PTH2			ENSG00000185482	STAC3
ENSG00000128340	RAC2											ENSG00000142920	ADC			ENSG00000185551	NR2F2
ENSG00000128513	POT1											ENSG00000143061	IGSF3			ENSG00000185745	IFIT1
ENSG00000129667	RHBDF2											ENSG00000143443	C1orf56			ENSG00000185917	SETD4
ENSG00000130332	LSM7											ENSG00000143590	EFNA3			ENSG00000185920	PTCH1
ENSG00000130720	FIBCD1											ENSG00000143842	SOX13			ENSG00000185962	LCE3A
ENSG00000130779	CLIP1											ENSG00000143845	ETNK2			ENSG00000186162	CIDECP
ENSG00000130803	ZNF317											ENSG00000143882	ATP6V1C2			ENSG00000186187	ZNRF1
ENSG00000130822	PNCK											ENSG00000143995	MEIS1			ENSG00000186810	CXCR3
ENSG00000130881	LRP3											ENSG00000144455	SUMF1			ENSG00000186862	PDZD7
ENSG00000131096	PYY											ENSG00000144648	ACKR2			ENSG00000187764	SEMA4D
ENSG00000131171	SH3BGRL											ENSG00000144730	IL17RD			ENSG00000188112	C6orf132
ENSG00000131400	NAPSA											ENSG00000144893	MED12L			ENSG00000188825	LINC00910
ENSG00000131788	PIAS3											ENSG00000144935	TRPC1			ENSG00000188850	RP11-159F24.2
ENSG00000131849	ZNF132											ENSG00000145506	NKD2			ENSG00000188868	ZNF563
ENSG00000132300	PTCD3											ENSG00000145555	MYO10			ENSG00000189091	SF3B3
ENSG00000132334	PTPRE											ENSG00000145623	OSMR			ENSG00000189144	ZNF573
ENSG00000132470	ITGB4											ENSG00000145642	FAM159B			ENSG00000196204	RNF216P1
ENSG00000132498	ANKRD20A3											ENSG00000145730	PAM			ENSG00000196353	CPNE4
ENSG00000132510	KDM6B											ENSG00000145777	TSLP			ENSG00000196418	ZNF124
ENSG00000132623	ANKEF1											ENSG00000145861	C1QTNF2			ENSG00000196458	ZNF605
ENSG00000132744	ACY3											ENSG00000145911	N4BP3			ENSG00000196498	NCOR2
ENSG00000132912	DCTN4											ENSG00000146828	SLC12A9			ENSG00000196588	MKL1
ENSG00000133055	MYBPH											ENSG00000147027	TMEM47			ENSG00000196646	ZNF136
ENSG00000133083	DCLK1											ENSG00000147862	NFIB			ENSG00000196670	ZFP62
ENSG00000133169	BEX1											ENSG00000148200	NR6A1			ENSG00000196724	ZNF418
ENSG00000133195	SLC39A11											ENSG00000148468	FAM171A1			ENSG00000197054	ZNF763
ENSG00000133243	BTBD2											ENSG00000148488	ST8SIA6			ENSG00000197646	PDCD1LG2
ENSG00000133665	DYDC2											ENSG00000148498	PARD3			ENSG00000197808	ZNF461
ENSG00000133773	CCDC59											ENSG00000148935	GAS2			ENSG00000198040	ZNF84
ENSG00000133805	AMPD3											ENSG00000149599	DUSP15			ENSG00000198400	NTRK1
ENSG00000133895	MEN1											ENSG00000149927	DOC2A			ENSG00000198466	ZNF587
ENSG00000133962	CATSPERB											ENSG00000150687	PRSS23			ENSG00000198723	C19orf45
ENSG00000134201	GSTM5											ENSG00000151025	GPR158			ENSG00000198796	ALPK2
ENSG00000134419	RPS15A											ENSG00000151135	C12orf23			ENSG00000198835	GJC2
ENSG00000134830	C5AR2											ENSG00000151322	NPAS3			ENSG00000199961	SNORD1B
ENSG00000135046	ANXA1											ENSG00000151612	ZNF827			ENSG00000200252	Y_RNA
ENSG00000135090	TAOK3											ENSG00000152784	PRDM8			ENSG00000200496	U8
ENSG00000135094	SDS											ENSG00000153162	BMP6			ENSG00000202385	Y_RNA
ENSG00000135213	POM121C											ENSG00000153317	ASAP1			ENSG00000202526	RNA5S13
ENSG00000135372	NAT10											ENSG00000153823	PID1			ENSG00000203446	AC004988.1
ENSG00000135439	AGAP2											ENSG00000154102	C16orf74			ENSG00000203709	C1orf132
ENSG00000135452	TSPAN31											ENSG00000154127	UBASH3B			ENSG00000204394	VARS
ENSG00000135744	AGT											ENSG00000154134	ROBO3			ENSG00000204472	AIF1
ENSG00000136315	RP11-84C10.2											ENSG00000154153	FAM134B			ENSG00000204514	ZNF814
ENSG00000136327	NKX2-8											ENSG00000154639	CXADR			ENSG00000206652	RNU1-1
ENSG00000136527	TRA2B											ENSG00000154928	EPHB1			ENSG00000211688	TRGJP2
ENSG00000136535	TBR1											ENSG00000155265	GOLGA7B			ENSG00000211697	TRGV5
ENSG00000136824	SMC2											ENSG00000155893	ACPL2			ENSG00000213246	SUPT4H1
ENSG00000136840	ST6GALNAC4											ENSG00000156298	TSPAN7			ENSG00000213904	LIPE-AS1
ENSG00000136866	ZFP37											ENSG00000157111	TMEM171			ENSG00000214174	AMZ2P1
ENSG00000136918	WDR38											ENSG00000157152	SYN2			ENSG00000215630	GUSBP9
ENSG00000137154	RPS6											ENSG00000157404	KIT			ENSG00000221686	AC096579.1
ENSG00000137338	PGBD1											ENSG00000157654	PALM2-AKAP2			ENSG00000222041	LINC00152
ENSG00000137343	ATAT1											ENSG00000157870	FAM213B			ENSG00000222320	RNU6-1050P
ENSG00000138002	IFT172											ENSG00000158055	GRHL3			ENSG00000223486	AC092198.1
ENSG00000138190	EXOC6											ENSG00000158856	DMTN			ENSG00000223612	RP11-289I10.2
ENSG00000138378	STAT4											ENSG00000159307	SCUBE1			ENSG00000224014	RP11-488L18.6
ENSG00000138641	HERC3											ENSG00000159387	IRX6			ENSG00000224127	RP11-510C10.2
ENSG00000138650	PCDH10											ENSG00000159712	ANKRD18CP			ENSG00000224149	RP11-510C10.3
ENSG00000138835	RGS3											ENSG00000159753	RLTPR			ENSG00000224276	RP11-336K24.5
ENSG00000138964	PARVG											ENSG00000159899	NPR2			ENSG00000224458	GUSBP6
ENSG00000139187	KLRG1											ENSG00000160439	RDH13			ENSG00000224579	AC012314.19
ENSG00000139269	INHBE											ENSG00000160460	SPTBN4			ENSG00000224957	AC090044.1
ENSG00000139292	LGR5											ENSG00000160471	COX6B2			ENSG00000225075	RP11-426L16.3
ENSG00000139537	CCDC65											ENSG00000160932	LY6E			ENSG00000225492	GBP1P1
ENSG00000139567	ACVRL1											ENSG00000161243	FBXO27			ENSG00000226312	CFLAR-AS1
ENSG00000139722	VPS37B											ENSG00000162373	BEND5			ENSG00000227110	LMCD1-AS1
ENSG00000140181	HERC2P2											ENSG00000162415	ZSWIM5			ENSG00000227484	XX-C283C717.1
ENSG00000140199	SLC12A6											ENSG00000162433	AK4			ENSG00000228478	RP1-290I10.3
ENSG00000140470	ADAMTS17											ENSG00000162437	RAVER2			ENSG00000228634	RP4-534N18.2
ENSG00000140795	MYLK3											ENSG00000162746	FCRLB			ENSG00000228848	AC105402.2
ENSG00000141141	DDX52											ENSG00000163071	SPATA18			ENSG00000229162	RP11-84D1.1
ENSG00000141505	ASGR1											ENSG00000163075	PCDP1			ENSG00000229727	AC013460.1
ENSG00000141736	ERBB2											ENSG00000163083	INHBB			ENSG00000230006	ANKRD36BP2
ENSG00000141994	DUS3L											ENSG00000163288	GABRB1			ENSG00000230104	AC018712.2
ENSG00000142227	EMP3											ENSG00000163293	NIPAL1			ENSG00000230638	RP11-486B10.4
ENSG00000142330	CAPN10											ENSG00000163364	LINC01116			ENSG00000231690	LINC00574
ENSG00000142405	NLRP12											ENSG00000163545	NUAK2			ENSG00000232124	AP001057.1
ENSG00000142733	MAP3K6											ENSG00000163629	PTPN13			ENSG00000232973	CYP1B1-AS1
ENSG00000143321	HDGF											ENSG00000163734	CXCL3			ENSG00000233096	RP11-520A21.1
ENSG00000144031	ANKRD53											ENSG00000163947	ARHGEF3			ENSG00000233529	HCG21
ENSG00000144136	SLC20A1											ENSG00000164061	BSN			ENSG00000235172	CTB-114C7.3
ENSG00000144158	RP11-395L14.17											ENSG00000164076	CAMKV			ENSG00000235480	RP11-363D14.1
ENSG00000144381	HSPD1											ENSG00000164151	KIAA0947			ENSG00000235513	RP4-756G23.5
ENSG00000144792	ZNF660											ENSG00000164181	ELOVL7			ENSG00000235568	NFAM1
ENSG00000145982	FARS2											ENSG00000164236	ANKRD33B			ENSG00000235641	LINC00484
ENSG00000147255	IGSF1											ENSG00000164237	CMBL			ENSG00000235749	RP11-634B7.4
ENSG00000147454	SLC25A37											ENSG00000164323	KIAA1430			ENSG00000235938	RP11-157L3.4
ENSG00000148180	GSN											ENSG00000164402	SEPT8			ENSG00000235947	EGOT
ENSG00000148290	SURF1											ENSG00000164663	USP49			ENSG00000235978	AC018816.3
ENSG00000148399	DPH7											ENSG00000164841	TMEM74			ENSG00000236308	RP11-316M21.7
ENSG00000148841	ITPRIP											ENSG00000165023	DIRAS2			ENSG00000236591	RP11-162J8.3
ENSG00000148908	RGS10											ENSG00000165124	SVEP1			ENSG00000236817	RP11-978I15.10
ENSG00000148948	LRRC4C											ENSG00000165140	FBP1			ENSG00000236985	RP5-1195D24.1
ENSG00000149054	ZNF215											ENSG00000165238	WNK2			ENSG00000237422	RP11-305L7.3
ENSG00000149115	TNKS1BP1											ENSG00000165633	VSTM4			ENSG00000237604	AP001056.1
ENSG00000149357	LAMTOR1											ENSG00000165795	NDRG2			ENSG00000238186	RP11-656D10.6
ENSG00000149781	FERMT3											ENSG00000165804	ZNF219			ENSG00000239396	RN7SL414P
ENSG00000149798	CDC42EP2											ENSG00000166016	ABTB2			ENSG00000239719	RP4-800G7.1
ENSG00000150093	ITGB1											ENSG00000166145	SPINT1			ENSG00000240280	TCAM1P
ENSG00000150722	PPP1R1C											ENSG00000166173	LARP6			ENSG00000240898	RP11-48B14.1
ENSG00000151240	DIP2C											ENSG00000166257	SCN3B			ENSG00000242244	ATP5G1P3
ENSG00000151835	SACS											ENSG00000166503	HDGFRP3			ENSG00000242829	RPS26P21
ENSG00000152433	ZNF547											ENSG00000166780	C16orf45			ENSG00000245680	ZNF585B
ENSG00000152439	ZNF773											ENSG00000166888	STAT6			ENSG00000245910	SNHG6
ENSG00000152578	GRIA4											ENSG00000167100	SAMD14			ENSG00000247011	RP11-700H6.1
ENSG00000152818	UTRN											ENSG00000167105	TMEM92			ENSG00000247809	NR2F2-AS1
ENSG00000153896	ZNF599											ENSG00000167194	C16orf92			ENSG00000249241	AC195454.1
ENSG00000154358	OBSCN											ENSG00000167535	CACNB3			ENSG00000250073	RP11-677M14.3
ENSG00000154645	CHODL											ENSG00000167646	DNAAF3			ENSG00000251139	RP11-701P16.2
ENSG00000155008	APOOL											ENSG00000168348	INSM2			ENSG00000251301	RP11-81H14.2
ENSG00000155465	SLC7A7											ENSG00000168502	SOGA2			ENSG00000251413	RP11-534L6.5
ENSG00000156030	ELMSAN1											ENSG00000168528	SERINC2			ENSG00000251665	RP11-700H6.2
ENSG00000156299	TIAM1											ENSG00000168675	LDLRAD4			ENSG00000252285	RNU7-5P
ENSG00000156858	PRR14											ENSG00000168758	SEMA4C			ENSG00000252516	RNA5SP82
ENSG00000157227	MMP14											ENSG00000168772	CXXC4			ENSG00000253125	RP11-459E5.1
ENSG00000157303	SUSD3											ENSG00000168913	ENHO			ENSG00000253485	PCDHGA5
ENSG00000157350	ST3GAL2											ENSG00000169116	PARM1			ENSG00000254246	CTB-120L21.1
ENSG00000157613	CREB3L1											ENSG00000169126	ARMC4			ENSG00000254328	CTC-308K20.4
ENSG00000158246	FAM46B											ENSG00000169302	STK32A			ENSG00000254341	SNORD87
ENSG00000158714	SLAMF8											ENSG00000169933	FRMPD4			ENSG00000254536	RP11-108K14.8
ENSG00000158859	ADAMTS4											ENSG00000169991	IFFO2			ENSG00000254859	RP11-661A12.5
ENSG00000158864	NDUFS2											ENSG00000170214	ADRA1B			ENSG00000254884	RP11-682B13.2
ENSG00000159625	CCDC135											ENSG00000170485	NPAS2			ENSG00000255144	RP11-589N15.1
ENSG00000159840	ZYX											ENSG00000170776	AKAP13			ENSG00000255274	TMPRSS4-AS1
ENSG00000160214	RRP1											ENSG00000171016	PYGO1			ENSG00000255363	RP11-672A2.5
ENSG00000160298	C21orf58											ENSG00000171453	POLR1C			ENSG00000256340	ABCC6P1
ENSG00000160325	CACFD1											ENSG00000171680	PLEKHG5			ENSG00000256751	RP11-695J4.2
ENSG00000160691	SHC1											ENSG00000171843	MLLT3			ENSG00000257477	LINC01154
ENSG00000160783	PMF1											ENSG00000171873	ADRA1D			ENSG00000257738	RP11-139E19.2
ENSG00000160799	CCDC12											ENSG00000172159	FRMD3			ENSG00000257923	CUX1
ENSG00000160951	PTGER1											ENSG00000172348	RCAN2			ENSG00000258131	RP11-541G9.1
ENSG00000161551	ZNF577											ENSG00000172380	GNG12			ENSG00000258405	ZNF578
ENSG00000161570	CCL5											ENSG00000172757	CFL1			ENSG00000258560	CTD-2376I20.1
ENSG00000161653	NAGS											ENSG00000172794	RAB37			ENSG00000258602	RP11-7F17.7
ENSG00000161996	WDR90											ENSG00000172803	SNX32			ENSG00000258843	RP11-286O18.1
ENSG00000162086	ZNF75A											ENSG00000172819	RARG			ENSG00000259354	RP11-519G16.3
ENSG00000162490	DRAXIN											ENSG00000172985	SH3RF3			ENSG00000259674	RP11-356M20.1
ENSG00000162670	BRINP3											ENSG00000172987	HPSE2			ENSG00000259711	CTD-3032H12.2
ENSG00000163060	TEKT4											ENSG00000173295	FAM86B3P			ENSG00000260177	RP4-536B24.3
ENSG00000163170	BOLA3											ENSG00000173698	GPR64			ENSG00000260550	RP11-457I16.2
ENSG00000163288	GABRB1											ENSG00000174307	PHLDA3			ENSG00000260907	AC008088.4
ENSG00000163466	ARPC2											ENSG00000175093	SPSB4			ENSG00000261118	RP11-104N10.1
ENSG00000163702	IL17RC											ENSG00000175556	LONRF3			ENSG00000261135	RP4-798A10.7
ENSG00000163884	KLF15											ENSG00000175832	ETV4			ENSG00000261253	AC137932.6
ENSG00000164054	SHISA5											ENSG00000175928	LRRN1			ENSG00000261588	AC002310.17
ENSG00000164124	TMEM144											ENSG00000176406	RIMS2			ENSG00000261664	RP11-275F13.1
ENSG00000164128	NPY1R											ENSG00000176595	KBTBD11			ENSG00000261790	AC005606.14
ENSG00000164251	F2RL1											ENSG00000176641	RNF152			ENSG00000262061	RP11-1260E13.4
ENSG00000164631	ZNF12											ENSG00000176658	MYO1D			ENSG00000262539	RP11-259G18.3
ENSG00000164880	INTS1											ENSG00000176845	METRNL			ENSG00000263506	MIR5193
ENSG00000164916	FOXK1											ENSG00000176984	AP000679.2			ENSG00000263717	RP11-466A19.6
ENSG00000165169	DYNLT3											ENSG00000176998	HCG4			ENSG00000263800	MIR5684
ENSG00000165171	WBSCR27											ENSG00000177098	SCN4B			ENSG00000263818	CTD-2206N4.4
ENSG00000165175	MID1IP1											ENSG00000177181	RIMKLA			ENSG00000263847	RP11-143J12.3
ENSG00000165240	ATP7A											ENSG00000177359	RP11-551L14.1			ENSG00000263875	AL353629.1
ENSG00000165458	INPPL1											ENSG00000177374	HIC1			ENSG00000264030	RN7SL66P
ENSG00000165689	SDCCAG3											ENSG00000177453	NIM1K			ENSG00000264984	MIR5691
ENSG00000165752	STK32C											ENSG00000177614	PGBD5			ENSG00000265438	MIR4751
ENSG00000165775	FUNDC2											ENSG00000178163	ZNF518B			ENSG00000265650	AC012627.1
ENSG00000165912	PACSIN3											ENSG00000179388	EGR3			ENSG00000265916	RP11-434D2.9
ENSG00000165915	SLC39A13											ENSG00000179636	TPPP2			ENSG00000266599	RP11-466A19.3
ENSG00000166441	RPL27A											ENSG00000180071	ANKRD18A			ENSG00000266718	RP11-466A19.1
ENSG00000166987	MBD6											ENSG00000180155	LYNX1			ENSG00000266849	AC083906.2
ENSG00000167005	NUDT21											ENSG00000180279	CTD-2568A17.5			ENSG00000266913	CTC-548K16.2
ENSG00000167178	ISLR2											ENSG00000180537	RNF182			ENSG00000267063	AC006130.3
ENSG00000167210	LOXHD1											ENSG00000180611	MB21D2			ENSG00000267091	CTBP2P7
ENSG00000167460	TPM4											ENSG00000180667	YOD1			ENSG00000267257	RP11-1151B14.4
ENSG00000167549	CORO6											ENSG00000180801	ARSJ			ENSG00000267265	CTC-550B14.7
ENSG00000167555	ZNF528											ENSG00000180828	BHLHE22			ENSG00000267279	RP11-879F14.2
ENSG00000167608	TMC4											ENSG00000181061	HIGD1A			ENSG00000267375	CTB-186G2.4
ENSG00000167613	LAIR1											ENSG00000181126	HLA-V			ENSG00000267517	CTD-2231E14.4
ENSG00000167658	EEF2											ENSG00000182134	TDRKH			ENSG00000267640	CTD-2554C21.2
ENSG00000167716	WDR81											ENSG00000182175	RGMA			ENSG00000267913	AP001055.1
ENSG00000167748	KLK1											ENSG00000182957	SPATA13			ENSG00000267943	CTD-2620I22.3
ENSG00000167945	PRR25											ENSG00000183087	GAS6			ENSG00000268605	CTB-50E14.4
ENSG00000168003	SLC3A2											ENSG00000183092	BEGAIN			ENSG00000268705	CTD-2561J22.6
ENSG00000168067	MAP4K2											ENSG00000183597	TANGO2			ENSG00000268970	CTD-3099C6.11
ENSG00000168310	IRF2											ENSG00000183655	KLHL25			ENSG00000269392	CTB-191K22.6
ENSG00000168575	SLC20A2											ENSG00000184203	PPP1R2			ENSG00000269540	CTD-2126E3.5
ENSG00000168661	ZNF30											ENSG00000184221	OLIG1			ENSG00000269867	CTD-2583A14.8
ENSG00000168772	CXXC4											ENSG00000184304	PRKD1			ENSG00000270773	RP13-685P2.7
ENSG00000168916	ZNF608											ENSG00000184371	CSF1			ENSG00000270804	CTD-2583A14.11
ENSG00000168936	TMEM129											ENSG00000184613	NELL2			ENSG00000271022	RP11-142I2.1
ENSG00000169047	IRS1											ENSG00000185046	ANKS1B			ENSG00000271314	RP11-435O5.6
ENSG00000169057	MECP2											ENSG00000185483	ROR1			ENSG00000271443	RP11-541E12.1
ENSG00000169220	RGS14											ENSG00000185737	NRG3			ENSG00000271751	RP11-110I1.14
ENSG00000169385	RNASE2											ENSG00000185787	MORF4L1			ENSG00000272255	CTD-3224K15.3
ENSG00000169567	HINT1											ENSG00000185800	DMWD			ENSG00000272774	RP11-433A10.3
ENSG00000169683	LRRC45											ENSG00000185920	PTCH1			ENSG00000272874	RP5-1103G7.10
ENSG00000169727	GPS1											ENSG00000186326	RGS9BP			ENSG00000273402	RP5-855D21.2
ENSG00000169884	WNT10B											ENSG00000186479	RGS7BP
ENSG00000169896	ITGAM											ENSG00000186530	XKR5
ENSG00000170161	RP11-262H14.4											ENSG00000186806	VSIG10L
ENSG00000170776	AKAP13											ENSG00000186907	RTN4RL2
ENSG00000170788	DYDC1											ENSG00000186918	ZNF395
ENSG00000170836	PPM1D											ENSG00000187479	C11orf96
ENSG00000170954	ZNF415											ENSG00000187556	NANOS3
ENSG00000171033	PKIA											ENSG00000187634	SAMD11
ENSG00000171291	ZNF439											ENSG00000187678	SPRY4
ENSG00000171777	RASGRP4											ENSG00000187824	TMEM220
ENSG00000171817	ZNF540											ENSG00000188290	HES4
ENSG00000171984	C20orf196											ENSG00000188523	C9orf171
ENSG00000172062	SMN1											ENSG00000189157	FAM47E
ENSG00000172366	FAM195A											ENSG00000196358	NTNG2
ENSG00000172497	ACOT12											ENSG00000196411	EPHB4
ENSG00000172613	RAD9A											ENSG00000196711	FAM150A
ENSG00000172725	CORO1B											ENSG00000196782	MAML3
ENSG00000172927	MYEOV											ENSG00000197183	C20orf112
ENSG00000173020	ADRBK1											ENSG00000197321	SVIL
ENSG00000173041	ZNF680											ENSG00000197410	DCHS2
ENSG00000173153	ESRRA											ENSG00000197594	ENPP1
ENSG00000173198	CYSLTR1											ENSG00000197763	TXNRD3
ENSG00000173327	MAP3K11											ENSG00000197852	FAM212B
ENSG00000173421	CCDC36											ENSG00000197977	ELOVL2
ENSG00000173511	VEGFB											ENSG00000198088	NUP62CL
ENSG00000173599	PC											ENSG00000198515	CNGA1
ENSG00000174100	MRPL45											ENSG00000198719	DLL1
ENSG00000174788	PCP2											ENSG00000198729	PPP1R14C
ENSG00000174808	BTC											ENSG00000198816	ZNF358
ENSG00000175294	CATSPER1											ENSG00000198914	POU3F3
ENSG00000175489	LRRC25											ENSG00000198929	NOS1AP
ENSG00000175793	SFN											ENSG00000203288	RP11-98D18.9
ENSG00000176155	CCDC57											ENSG00000203710	CR1
ENSG00000176248	ANAPC2											ENSG00000203722	RAET1G
ENSG00000176274	SLC25A53											ENSG00000204052	LRRC73
ENSG00000176371	ZSCAN2											ENSG00000204128	C2orf72
ENSG00000176896	TCEANC											ENSG00000204147	ASAH2B
ENSG00000176909	MAMSTR											ENSG00000204314	PRRT1
ENSG00000177025	C19orf18											ENSG00000204650	CRHR1-IT1
ENSG00000177051	FBXO46											ENSG00000204860	FAM201A
ENSG00000177200	CHD9											ENSG00000204909	SPINK9
ENSG00000177311	ZBTB38											ENSG00000205106	CTD-2210P24.4
ENSG00000177380	PPFIA3											ENSG00000205795	CYS1
ENSG00000177406	RP11-218M22.1											ENSG00000207647	MIR153-1
ENSG00000177519	RPRM											ENSG00000213023	SYT3
ENSG00000177830	CHID1											ENSG00000213213	CCDC183
ENSG00000177875	C12orf68											ENSG00000213420	GPC2
ENSG00000177963	RIC8A											ENSG00000213889	PPM1N
ENSG00000178053	MLF1											ENSG00000214357	NEURL1B
ENSG00000178078	STAP2											ENSG00000214530	STARD10
ENSG00000178104	PDE4DIP											ENSG00000215397	SCRT2
ENSG00000178209	PLEC											ENSG00000218358	RAET1K
ENSG00000178222	RNF212											ENSG00000218416	AC110619.2
ENSG00000178917	ZNF852											ENSG00000220161	RP1-37N7.3
ENSG00000179262	RAD23A											ENSG00000221818	EBF2
ENSG00000179284	DAND5											ENSG00000221988	PPT2
ENSG00000179304	FAM156B											ENSG00000223711	AC091633.3
ENSG00000179335	CLK3											ENSG00000224577	LINC01117
ENSG00000179526	SHARPIN											ENSG00000224818	RP11-134G8.8
ENSG00000179750	APOBEC3B											ENSG00000225280	RP11-227D2.3
ENSG00000179761	PIPOX											ENSG00000225362	CT62
ENSG00000180448	HMHA1											ENSG00000225764	LEPREL1-AS1
ENSG00000180458	CTD-3064H18.4											ENSG00000225988	RP5-1119D9.4
ENSG00000180871	CXCR2											ENSG00000226377	AC084809.2
ENSG00000180891	CUEDC1											ENSG00000226386	PARD3-AS1
ENSG00000181404	XXyac-YRM2039.2											ENSG00000226679	RP13-43E11.1
ENSG00000181652	ATG9B											ENSG00000226819	MEIS1-AS3
ENSG00000181982	CCDC149											ENSG00000226886	AC093787.1
ENSG00000182264	IZUMO1											ENSG00000226913	BSN-AS2
ENSG00000182502	ABHD17AP5											ENSG00000227356	LINC00866
ENSG00000182557	SPNS3											ENSG00000227640	SOX21-AS1
ENSG00000182568	SATB1											ENSG00000227757	AP000282.2
ENSG00000182896	TMEM95											ENSG00000227811	FAM212B-AS1
ENSG00000182957	SPATA13											ENSG00000227825	SLC9A7P1
ENSG00000183019	C19orf59											ENSG00000228322	RP11-358M14.2
ENSG00000183086	GATSL1											ENSG00000228973	AC009955.8
ENSG00000183260	ABHD16B											ENSG00000229262	RP4-726N1.2
ENSG00000183378	OVCH2											ENSG00000230314	ELOVL2-AS1
ENSG00000183474	GTF2H2C											ENSG00000230453	ANKRD18B
ENSG00000183576	SETD3											ENSG00000230729	RP11-296L22.8
ENSG00000183828	NUDT14											ENSG00000230749	MEIS1-AS2
ENSG00000183831	ANKRD45											ENSG00000231121	RP1-34H18.1
ENSG00000183840	GPR39											ENSG00000231185	AC005592.2
ENSG00000183929	DUSP5P1											ENSG00000231198	AC004987.10
ENSG00000184110	EIF3C											ENSG00000232034	AC092168.2
ENSG00000184319	RPL23AP82											ENSG00000232070	TMEM253
ENSG00000184428	TOP1MT											ENSG00000232284	GNG12-AS1
ENSG00000184785	SMIM10											ENSG00000232298	RP11-10N16.3
ENSG00000184939	ZFP90											ENSG00000232480	RP11-224O19.2
ENSG00000185010	F8											ENSG00000233225	AC004987.9
ENSG00000185164	NOMO2											ENSG00000233237	LINC00472
ENSG00000185222	WBP5											ENSG00000233255	AC019181.2
ENSG00000185324	CDK10											ENSG00000233472	RP11-218D6.4
ENSG00000185332	TMEM105											ENSG00000233642	GPR158-AS1
ENSG00000185504	C17orf70											ENSG00000235501	RP4-639F20.1
ENSG00000185567	AHNAK2											ENSG00000235725	AC007389.3
ENSG00000185630	PBX1											ENSG00000236466	RP11-795J1.1
ENSG00000185670	ZBTB3											ENSG00000236643	RP11-175D17.3
ENSG00000185825	BCAP31											ENSG00000236671	PRKG1-AS1
ENSG00000185829	ARL17A											ENSG00000236833	AC024560.2
ENSG00000186272	ZNF17											ENSG00000236914	RP11-1008C21.2
ENSG00000186470	BTN3A2											ENSG00000236943	RP11-640M9.1
ENSG00000186481	ANKRD20A5P											ENSG00000237461	RP11-554F20.1
ENSG00000186635	ARAP1											ENSG00000237732	AC010980.2
ENSG00000186866	POFUT2											ENSG00000237943	PRKCQ-AS1
ENSG00000187372	PCDHB13											ENSG00000239137	snoU13
ENSG00000187688	TRPV2											ENSG00000241978	AKAP2
ENSG00000187955	COL14A1											ENSG00000243018	RP5-1070G24.2
ENSG00000187987	ZSCAN23											ENSG00000243444	PALM2
ENSG00000188033	ZNF490											ENSG00000243910	TUBA4B
ENSG00000188070	C11orf95											ENSG00000244486	SCARF2
ENSG00000188095	MESP2											ENSG00000244522	AC092669.1
ENSG00000188153	COL4A5											ENSG00000244558	RP11-445H22.4
ENSG00000188321	ZNF559											ENSG00000244586	WNT5A-AS1
ENSG00000188419	CHM											ENSG00000245384	AC004053.1
ENSG00000188681	TEKT4P2											ENSG00000245857	GS1-24F4.2
ENSG00000188987	HIST1H4D											ENSG00000246214	RP11-260E18.1
ENSG00000189042	ZNF567											ENSG00000246334	PRR7-AS1
ENSG00000189149	CRYM-AS1											ENSG00000246640	RP11-1094H24.4
ENSG00000196141	SPATS2L											ENSG00000246790	RP11-730K11.1
ENSG00000196218	RYR1											ENSG00000247193	RP11-431M7.3
ENSG00000196295	AC005154.6											ENSG00000247317	RP11-273G15.2
ENSG00000196569	LAMA2											ENSG00000249693	THEGL
ENSG00000196576	PLXNB2											ENSG00000249740	CTD-2127H9.1
ENSG00000196605	ZNF846											ENSG00000249853	HS3ST5
ENSG00000196622	RIMBP3											ENSG00000250305	KIAA1456
ENSG00000196712	NF1											ENSG00000250343	CTC-255N20.1
ENSG00000196922	ZNF252P											ENSG00000250360	CTD-2089N3.1
ENSG00000196967	ZNF585A											ENSG00000250415	CTC-461F20.1
ENSG00000197061	HIST1H4C											ENSG00000250510	GPR162
ENSG00000197062	RP5-874C20.3											ENSG00000250588	IQCJ-SCHIP1
ENSG00000197182	FLJ27365											ENSG00000251450	CTC-459I6.1
ENSG00000197324	LRP10											ENSG00000252695	MIR2276
ENSG00000197360	ZNF98											ENSG00000253368	TRNP1
ENSG00000197405	C5AR1											ENSG00000253591	CTC-265N9.1
ENSG00000197461	PDGFA											ENSG00000253653	CTC-248O19.1
ENSG00000197497	ZNF665											ENSG00000253764	RP11-439C15.4
ENSG00000197565	COL4A6											ENSG00000253893	FAM85B
ENSG00000197697	HIST1H2BE											ENSG00000254102	RP11-21C4.1
ENSG00000197914	HIST1H4K											ENSG00000254333	CTC-367J11.1
ENSG00000197932	F8A1											ENSG00000254508	RP11-646J21.5
ENSG00000197935	ZNF311											ENSG00000254854	CTD-2523D13.2
ENSG00000197971	MBP											ENSG00000255136	CTD-2562J17.4
ENSG00000198082	H2AFB1											ENSG00000255272	RP11-646J21.6
ENSG00000198131	ZNF544											ENSG00000255529	POLR2M
ENSG00000198157	HMGN5											ENSG00000255735	AC110619.1
ENSG00000198160	MIER1											ENSG00000256248	RP11-123O10.4
ENSG00000198216	CACNA1E											ENSG00000257093	KIAA1147
ENSG00000198431	TXNRD1											ENSG00000258285	RP11-103B5.2
ENSG00000198466	ZNF587											ENSG00000258355	RP11-651L5.2
ENSG00000198521	ZNF43											ENSG00000258388	PPT2-EGFL8
ENSG00000198556	ZNF789											ENSG00000258576	CTD-2644I21.1
ENSG00000198821	CD247											ENSG00000258604	AL161668.5
ENSG00000198848	CES1											ENSG00000258655	ARHGAP5-AS1
ENSG00000198987	MIR16-2											ENSG00000259377	CTD-2308G16.1
ENSG00000199071	MIR423											ENSG00000259498	RP11-244F12.3
ENSG00000199334	RNA5S11											ENSG00000259863	SH3RF3-AS1
ENSG00000199352	RNA5S1											ENSG00000260329	RP11-412D9.4
ENSG00000199360	RNU6-1115P											ENSG00000260372	AQP4-AS1
ENSG00000199712	SNORD115-2											ENSG00000260681	CTA-363E6.5
ENSG00000199782	SNORD115-9											ENSG00000260876	RP11-345M22.1
ENSG00000199970	SNORD115-3											ENSG00000260992	DOCK9-AS2
ENSG00000200059	Y_RNA											ENSG00000261029	CTD-2588J6.2
ENSG00000200156	RNU5B-1											ENSG00000261183	RP11-532F12.5
ENSG00000200169	RNU5D-1											ENSG00000261390	RP11-345M22.2
ENSG00000200463	SNORD118											ENSG00000261594	TPBGL
ENSG00000200486	SNORD115-11											ENSG00000261659	LA16c-313D11.12
ENSG00000200503	SNORD115-5											ENSG00000261949	GFY
ENSG00000200680	SNORD115-4											ENSG00000262768	RP11-353N14.1
ENSG00000200726	SNORD115-8											ENSG00000263155	MYZAP
ENSG00000200812	SNORD115-6											ENSG00000263400	CTC-297N7.5
ENSG00000201264	SNORD73											ENSG00000263448	AL133410.1
ENSG00000201558	RNVU1-6											ENSG00000263715	RP11-105N13.4
ENSG00000201654	RNU6-7											ENSG00000265064	MIR4692
ENSG00000201741	Y_RNA											ENSG00000265489	RP11-1090M7.1
ENSG00000201800	Y_RNA											ENSG00000265962	RP11-674N23.1
ENSG00000201831	SNORD115-1											ENSG00000267001	AC006538.4
ENSG00000201943	SNORD115-10											ENSG00000267034	RP11-384O8.1
ENSG00000202056	RNA5SP19											ENSG00000267036	AC005559.3
ENSG00000202229	RNU6-1138P											ENSG00000267239	RP11-794M8.1
ENSG00000202337	RNU6-8											ENSG00000267747	RP11-392O1.4
ENSG00000202496	RNVU1-20											ENSG00000267905	CTD-2616J11.16
ENSG00000203618	GP1BB											ENSG00000267992	CTB-189B5.3
ENSG00000203667	COX20											ENSG00000268467	AP000889.3
ENSG00000204164	BMS1P5											ENSG00000268655	CTB-60B18.10
ENSG00000204316	MRPL38											ENSG00000268812	RP1-102K2.8
ENSG00000204351	SKIV2L											ENSG00000269169	AC004528.1
ENSG00000204389	HSPA1A											ENSG00000269800	PLEKHA3P1
ENSG00000204390	HSPA1L											ENSG00000269814	CTC-273B12.10
ENSG00000204514	ZNF814											ENSG00000270175	RP11-793H13.11
ENSG00000204571	KRTAP5-11											ENSG00000270299	RP5-850E9.3
ENSG00000204876	AC021218.2											ENSG00000270988	RP11-439C15.5
ENSG00000204920	ZNF155											ENSG00000271133	CTA-293F17.1
ENSG00000204946	ZNF783											ENSG00000271776	RP11-52L5.6
ENSG00000204977	TRIM13											ENSG00000271824	AC009014.3
ENSG00000204982	PRSS3P4											ENSG00000272082	AC093628.1
ENSG00000205246	RPSAP58											ENSG00000272202	RP11-157F20.3
ENSG00000205268	PDE7A											ENSG00000272414	FAM47E-STBD1
ENSG00000205571	SMN2											ENSG00000272512	RP11-54O7.17
ENSG00000205643	CDPF1											ENSG00000272679	RP11-216L13.18
ENSG00000205664	RP11-706O15.1											ENSG00000272695	GAS6-AS2
ENSG00000205744	DENND1C											ENSG00000272715	RP4-753F5.1
ENSG00000206053	HN1L											ENSG00000272944	CTD-2308L22.1
ENSG00000206140	TMEM191C											ENSG00000273025	CELF6
ENSG00000206176	AC023490.1											ENSG00000273066	RP11-216L13.19
ENSG00000206195	AP000525.9											ENSG00000273107	RP11-165A20.3
ENSG00000206775	SNORD37											ENSG00000273216	AC002059.10
ENSG00000206974	RNU6-1144P
ENSG00000207051	SNORA27
ENSG00000207063	SNORD116-1
ENSG00000207093	SNORD116-8
ENSG00000207133	SNORD116-7
ENSG00000207205	RNVU1-15
ENSG00000207500	SNORD102
ENSG00000207501	RNVU1-14
ENSG00000207779	MIR15B
ENSG00000207782	MIR150
ENSG00000207839	MIR33B
ENSG00000208797	SNORD73A
ENSG00000211482	AC092574.1
ENSG00000211691	TRGJP
ENSG00000212123	PRR22
ENSG00000212327	RNU6-882P
ENSG00000212335	Y_RNA
ENSG00000212533	SNORA75
ENSG00000212951	RP11-211N8.3
ENSG00000213096	ZNF254
ENSG00000213149	CNN2P9
ENSG00000213293	CTD-2666L21.3
ENSG00000213358	AC092933.4
ENSG00000213638	ADAT3
ENSG00000213683	AC002056.3
ENSG00000213793	ZNF888
ENSG00000214113	LYRM4
ENSG00000214185	XPOTP1
ENSG00000214530	STARD10
ENSG00000214702	RP11-247C2.1
ENSG00000214788	OOSP1
ENSG00000214796	RP11-480I12.5
ENSG00000214803	RP11-37N22.1
ENSG00000214820	MPRIPP1
ENSG00000215306	AL135998.1
ENSG00000215374	FAM66B
ENSG00000215458	AP001053.11
ENSG00000215795	RP11-488L18.3
ENSG00000215841	RP11-800A3.2
ENSG00000215979	AL021917.1
ENSG00000216004	AL359832.1
ENSG00000216863	LY86-AS1
ENSG00000220875	HIST1H3PS1
ENSG00000221222	AL139139.1
ENSG00000221343	AC010422.1
ENSG00000221533	MIR1184-1
ENSG00000221887	HMSD
ENSG00000221955	SLC12A8
ENSG00000221994	ZNF630
ENSG00000222012	AC005481.5
ENSG00000222335	Y_RNA
ENSG00000222701	Y_RNA
ENSG00000223382	RP1-65J11.1
ENSG00000223509	RP11-632K20.7
ENSG00000223705	NSUN5P1
ENSG00000223714	RP5-1172N10.2
ENSG00000224020	MIR181A2HG
ENSG00000224078	SNHG14
ENSG00000224595	AC073626.2
ENSG00000224897	POT1-AS1
ENSG00000225190	PLEKHM1
ENSG00000225331	AP001055.6
ENSG00000225470	JPX
ENSG00000225606	AC005281.2
ENSG00000225889	AC074289.1
ENSG00000225953	SATB2-AS1
ENSG00000226007	RP11-211N8.2
ENSG00000226051	ZNF503-AS1
ENSG00000226245	ZNF32-AS1
ENSG00000226314	ZNF192P1
ENSG00000226332	RP11-157P1.4
ENSG00000226675	RP11-666A1.3
ENSG00000226791	AC109826.1
ENSG00000226887	ERVMER34-1
ENSG00000227060	LINC00629
ENSG00000227141	RP11-545A16.3
ENSG00000227184	EPPK1
ENSG00000227500	SCAMP4
ENSG00000227508	RP5-894D12.3
ENSG00000227518	MIR1302-9
ENSG00000227781	GLUD1P2
ENSG00000227906	SNAP25-AS1
ENSG00000228007	AC011933.2
ENSG00000229116	RP11-20J15.3
ENSG00000229204	PTGES3P3
ENSG00000229388	RP11-442N24__B.1
ENSG00000229485	KSR1P1
ENSG00000229647	AC007879.7
ENSG00000229702	RP1-274L7.1
ENSG00000229789	RP11-391M20.1
ENSG00000230039	RP11-314A15.2
ENSG00000230832	RP11-325P15.2
ENSG00000230866	CTA-342B11.2
ENSG00000231079	AC105402.4
ENSG00000231081	RP4-760C5.3
ENSG00000231154	MORF4L2-AS1
ENSG00000231651	DLG3-AS1
ENSG00000232046	AC007392.3
ENSG00000232119	MCTS1
ENSG00000232151	RP11-353N4.8
ENSG00000232194	RP1-313L4.3
ENSG00000232388	LINC00493
ENSG00000232422	KNOP1P4
ENSG00000232434	C9orf172
ENSG00000232445	RP11-132A1.4
ENSG00000232721	RP11-403I13.5
ENSG00000232810	TNF
ENSG00000232866	AL513478.1
ENSG00000233038	AC011899.9
ENSG00000233117	LINC00702
ENSG00000233368	RP11-277L2.3
ENSG00000233396	RP11-458D21.1
ENSG00000233429	HOTAIRM1
ENSG00000233527	AC092295.7
ENSG00000233536	RP11-867G2.5
ENSG00000233836	RP11-255H23.2
ENSG00000234142	RP11-276E17.2
ENSG00000234292	RP11-213H15.1
ENSG00000234571	RP5-998N21.4
ENSG00000234665	RP11-262H14.3
ENSG00000234902	AC007879.2
ENSG00000235021	RP11-439E19.7
ENSG00000235109	ZSCAN31
ENSG00000235173	FAM203A
ENSG00000235301	HLA-Z
ENSG00000235437	RP11-357C3.3
ENSG00000235570	LINC00533
ENSG00000235704	AC023490.2
ENSG00000236008	AC011747.4
ENSG00000236081	AC074389.9
ENSG00000236310	AC005027.3
ENSG00000236471	AF127577.12
ENSG00000236536	AC003986.7
ENSG00000237253	RP11-666A1.5
ENSG00000237429	RP1-159A19.4
ENSG00000237457	RP11-547I7.2
ENSG00000237468	RP11-715G15.1
ENSG00000237594	AP000251.3
ENSG00000237803	LINC00211
ENSG00000237955	AC008746.10
ENSG00000237980	RP11-338C15.3
ENSG00000238132	CASC4P1
ENSG00000238774	AC009121.1
ENSG00000239367	RN7SL477P
ENSG00000239593	RP11-477J21.6
ENSG00000239617	RP11-302B13.1
ENSG00000240350	AC017002.1
ENSG00000240440	AC007879.3
ENSG00000240616	AD000092.3
ENSG00000240731	RP5-890O3.9
ENSG00000241505	RP11-161I10.1
ENSG00000241721	SUMO1P1
ENSG00000242516	LINC00960
ENSG00000242852	ZNF709
ENSG00000243150	RP11-538P18.2
ENSG00000243680	RPL37P23
ENSG00000244560	RP4-800G7.2
ENSG00000244676	AL109761.5
ENSG00000245526	LINC00461
ENSG00000245648	RP11-277P12.20
ENSG00000245748	RP11-367J11.2
ENSG00000247982	LINC00926
ENSG00000248126	CTD-2012J19.2
ENSG00000248243	RP11-93K22.13
ENSG00000248503	RP5-1000K24.2
ENSG00000248705	AC114812.10
ENSG00000249413	RP11-25H12.1
ENSG00000249417	RP11-438D8.2
ENSG00000249859	PVT1
ENSG00000250053	RARRES2P4
ENSG00000250101	RP11-1252I4.2
ENSG00000250155	CTD-2353F22.1
ENSG00000250241	RP11-9G1.3
ENSG00000250321	RP11-478C6.4
ENSG00000250397	RP11-1391J7.1
ENSG00000250510	GPR162
ENSG00000250523	RP11-756P10.1
ENSG00000250727	RP11-959I15.1
ENSG00000250762	RP1-313L4.4
ENSG00000250874	CTC-480C2.1
ENSG00000250892	RP11-1365D11.1
ENSG00000250934	RP11-71E19.1
ENSG00000251161	RP11-540O11.1
ENSG00000251169	AC005355.2
ENSG00000251287	ALG1L2
ENSG00000251417	RP11-1348G14.4
ENSG00000251432	RP11-420A23.1
ENSG00000251652	RP11-20I20.2
ENSG00000252097	RNU6-346P
ENSG00000252278	RNU6-866P
ENSG00000252557	SNORD112
ENSG00000252584	AC023050.1
ENSG00000252826	RNU1-92P
ENSG00000253024	RNU6-1238P
ENSG00000253144	RP11-281O15.7
ENSG00000253159	PCDHGA12
ENSG00000253474	RP11-10H3.1
ENSG00000253633	KB-1980E6.3
ENSG00000253844	RP11-546K22.1
ENSG00000254004	ZNF260
ENSG00000254165	RP11-503E24.2
ENSG00000254349	RP11-758M4.1
ENSG00000254489	RP5-1024C24.1
ENSG00000254910	RP11-326C3.7
ENSG00000255072	PIGY
ENSG00000255197	RP11-750H9.5
ENSG00000255408	PCDHA3
ENSG00000255491	RP11-1082L8.4
ENSG00000255737	AGAP2-AS1
ENSG00000255836	RP11-157G21.2
ENSG00000256269	HMBS
ENSG00000256323	AL049542.1
ENSG00000256442	RP11-705C15.4
ENSG00000256546	AC156455.1
ENSG00000256594	RP11-705C15.2
ENSG00000256616	RP11-815J4.6
ENSG00000257057	LINC01171
ENSG00000257256	RP3-405J10.4
ENSG00000257337	RP11-983P16.4
ENSG00000257499	RP11-571M6.8
ENSG00000257531	RP3-405J10.2
ENSG00000257878	RP11-256L6.3
ENSG00000258450	RP11-649E7.7
ENSG00000258515	RP11-203M5.7
ENSG00000258733	CTD-2341M24.1
ENSG00000259410	RP11-34F13.3
ENSG00000259660	DNM1P47
ENSG00000259712	CTD-2184D3.5
ENSG00000259890	DNM1P50
ENSG00000260077	RP11-254F7.2
ENSG00000260112	CTC-543D15.1
ENSG00000260128	ULK4P2
ENSG00000260193	RP11-83N9.5
ENSG00000260238	PMF1-BGLAP
ENSG00000260249	RP11-401P9.5
ENSG00000260282	EIF4EBP2P2
ENSG00000260479	RP11-556H2.3
ENSG00000260782	RP11-480G7.2
ENSG00000260861	RP4-576H24.4
ENSG00000260876	RP11-345M22.1
ENSG00000261055	RP11-195M16.3
ENSG00000261064	RP11-1000B6.3
ENSG00000261159	RP11-723O4.9
ENSG00000261192	RNF126P1
ENSG00000261392	RP11-473I1.6
ENSG00000261533	RP11-15N24.4
ENSG00000261546	CTD-2555A7.3
ENSG00000261727	RP11-1166P10.6
ENSG00000261829	RP11-223I10.1
ENSG00000261888	AC144831.1
ENSG00000262223	RP11-1055B8.3
ENSG00000262296	RP11-55L4.1
ENSG00000262468	RP11-95P2.1
ENSG00000262554	LA16c-360H6.2
ENSG00000262621	NAA60
ENSG00000262703	RP11-485G7.6
ENSG00000262877	RP11-1055B8.4
ENSG00000262899	LA16c-360H6.3
ENSG00000263171	RP11-542C16.1
ENSG00000263214	ZNF205-AS1
ENSG00000263470	RP11-160O5.1
ENSG00000263628	MIR3155A
ENSG00000263683	RP4-777O23.1
ENSG00000263749	OOSP1P2
ENSG00000263812	LINC00908
ENSG00000264075	MIR4783
ENSG00000265015	RP11-454P7.3
ENSG00000265118	CTD-2370N5.3
ENSG00000265178	MIR4728
ENSG00000265185	SNORD3B-1
ENSG00000265394	RP11-1148O4.2
ENSG00000265396	MIR3128
ENSG00000265403	AC015884.1
ENSG00000265474	AC010761.9
ENSG00000265700	MIR4647
ENSG00000265764	AL662890.3
ENSG00000265798	RP11-271K11.5
ENSG00000265840	AC010761.10
ENSG00000265867	MIR4516
ENSG00000265982	RP11-927P21.4
ENSG00000265987	RP11-16C1.3
ENSG00000266098	AL137127.1
ENSG00000266313	RP11-173M1.4
ENSG00000266581	MIR3166
ENSG00000266605	LONRF2P1
ENSG00000266656	AC104066.1
ENSG00000266919	MIR3184
ENSG00000266950	CTD-2623N2.5
ENSG00000266976	AC079466.1
ENSG00000266978	CTD-2369P2.5
ENSG00000267123	CTD-2357A8.3
ENSG00000267125	CTB-31O20.6
ENSG00000267157	CTB-54O9.9
ENSG00000267174	CTC-510F12.4
ENSG00000267274	CTD-2006C1.12
ENSG00000267470	ZNF571-AS1
ENSG00000267565	CTC-559E9.8
ENSG00000267605	CTD-3220F14.1
ENSG00000267668	RP11-697E22.2
ENSG00000267682	CTD-3220F14.2
ENSG00000267845	DKFZP434A062
ENSG00000267848	AL118506.1
ENSG00000268000	hsa-mir-150
ENSG00000268032	CTB-52I2.4
ENSG00000268095	CTC-429C10.2
ENSG00000268355	AC006129.1
ENSG00000268387	AL590714.1
ENSG00000268458	CTC-471J1.9
ENSG00000268544	RP11-277L2.4
ENSG00000268681	COX6CP7
ENSG00000268849	SIGLEC22P
ENSG00000268858	C20ORF135
ENSG00000268863	AC135048.1
ENSG00000269001	ZNF818P
ENSG00000269069	CTC-471F3.5
ENSG00000269074	AC099344.1
ENSG00000269235	HCCAT3
ENSG00000269399	CTD-3222D19.7
ENSG00000269416	CTB-175P5.4
ENSG00000269473	CTD-2619J13.19
ENSG00000269501	RP11-353N4.6
ENSG00000269604	AC005523.2
ENSG00000269711	CTD-3214H19.16
ENSG00000269720	CTD-2521M24.5
ENSG00000269796	AC011516.1
ENSG00000269834	CTD-3018O17.3
ENSG00000269919	RP1-134E15.3
ENSG00000270068	RP4-761J14.9
ENSG00000270069	RP6-99M1.2
ENSG00000270110	RP5-1139B12.4
ENSG00000270332	RP11-82L2.1
ENSG00000270346	RP1-90J20.12
ENSG00000270402	CTC-412M14.5
ENSG00000270814	TMEM261P1
ENSG00000270876	CTC-523E23.8
ENSG00000271002	RP11-599B13.8
ENSG00000271147	RP4-769N13.6
ENSG00000271752	RP11-269M20.3
ENSG00000271754	RP3-337H4.9
ENSG00000271820	RP5-894D12.5
ENSG00000271963	CTD-2140B24.6
ENSG00000272046	RP11-471M2.3
ENSG00000272056	RP11-503P10.1
ENSG00000272065	U91328.20
ENSG00000272233	RP11-503E24.3
ENSG00000272278	AL121932.1
ENSG00000272426	RP11-108M9.6
ENSG00000272462	U91328.19
ENSG00000272540	XXbac-BPG252P9.9
ENSG00000272885	RP11-2H3.6
ENSG00000273226	RP11-513M16.8
ENSG00000273297	RP11-38M8.1
ENSG00000273487	RP4-621B10.8
