# Supplementary material for: Decoding the spatial chromatin organization and dynamic epigenetic landscapes of macrophage cells during differentiation and immune activation
Source: Nat Commun. 2022 Oct 4;13:5857. doi: 10.1038/s41467-022-33558-5 (PMC9532393; doi:10.1038/s41467-022-33558-5)
Supplement: Supplementary file 7 — Supplementary Dataset 4 [file 41467_2022_33558_MOESM7_ESM.xlsx]

## Sheet: Sheet1
Weakened loop anchor gene				Strengthened loop anchor gene
ENSG00000001461	NIPAL3			ENSG00000000005	TNMD
ENSG00000002919	SNX11			ENSG00000000460	C1orf112
ENSG00000004059	ARF5			ENSG00000000971	CFH	immune-related gene
ENSG00000004866	ST7			ENSG00000001084	GCLC
ENSG00000005102	MEOX1			ENSG00000001460	STPG1
ENSG00000005206	SPPL2B			ENSG00000002330	BAD	immune-related gene
ENSG00000005483	KMT2E			ENSG00000002746	HECW1
ENSG00000005844	ITGAL	immune-related gene		ENSG00000002822	MAD1L1
ENSG00000006062	MAP3K14	immune-related gene		ENSG00000004848	ARX
ENSG00000006125	AP2B1	immune-related gene		ENSG00000004866	ST7
ENSG00000006555	TTC22			ENSG00000005108	THSD7A
ENSG00000007062	PROM1			ENSG00000005175	RPAP3
ENSG00000007129	CEACAM21			ENSG00000005486	RHBDD2
ENSG00000007306	CEACAM7			ENSG00000005810	MYCBP2
ENSG00000008516	MMP25			ENSG00000005893	LAMP2
ENSG00000008869	HEATR5B			ENSG00000006451	RALA
ENSG00000009307	CSDE1			ENSG00000006459	KDM7A
ENSG00000009954	BAZ1B			ENSG00000006576	PHTF2
ENSG00000010932	FMO1			ENSG00000006606	CCL26
ENSG00000011275	RNF216			ENSG00000006747	SCIN
ENSG00000012048	BRCA1			ENSG00000006837	CDKL3
ENSG00000012660	ELOVL5			ENSG00000007168	PAFAH1B1
ENSG00000013441	CLK1			ENSG00000007237	GAS7
ENSG00000014216	CAPN1			ENSG00000007341	ST7L
ENSG00000016490	CLCA1			ENSG00000007908	SELE	immune-related gene
ENSG00000018408	WWTR1			ENSG00000008083	JARID2
ENSG00000018699	TTC27			ENSG00000008256	CYTH3
ENSG00000019144	PHLDB1			ENSG00000008294	SPAG9
ENSG00000023171	GRAMD1B			ENSG00000008513	ST3GAL1
ENSG00000023228	NDUFS1			ENSG00000008869	HEATR5B
ENSG00000024422	EHD2			ENSG00000009307	CSDE1
ENSG00000028277	POU2F2			ENSG00000009413	REV3L
ENSG00000028839	TBPL1			ENSG00000010810	FYN	immune-related gene
ENSG00000029725	RABEP1			ENSG00000011052	NME2
ENSG00000030066	NUP160			ENSG00000011083	SLC6A7
ENSG00000031003	FAM13B			ENSG00000011275	RNF216
ENSG00000033627	ATP6V0A1			ENSG00000011426	ANLN
ENSG00000035664	DAPK2			ENSG00000011523	CEP68
ENSG00000037749	MFAP3			ENSG00000011566	MAP4K3
ENSG00000039319	ZFYVE16			ENSG00000012232	EXTL3
ENSG00000039537	C6	immune-related gene		ENSG00000012779	ALOX5
ENSG00000040731	CDH10			ENSG00000012963	UBR7
ENSG00000041515	MYO16			ENSG00000013364	MVP
ENSG00000043355	ZIC2			ENSG00000013583	HEBP1
ENSG00000044090	CUL7	immune-related gene		ENSG00000013588	GPRC5A
ENSG00000044115	CTNNA1			ENSG00000015285	WAS	immune-related gene
ENSG00000047315	POLR2B			ENSG00000018189	RUFY3
ENSG00000047410	TPR			ENSG00000020577	SAMD4A
ENSG00000048052	HDAC9			ENSG00000021574	SPAST
ENSG00000049768	FOXP3			ENSG00000021776	AQR
ENSG00000049769	PPP1R3F			ENSG00000023228	NDUFS1
ENSG00000049860	HEXB			ENSG00000023909	GCLM
ENSG00000050555	LAMC3			ENSG00000025423	HSD17B6
ENSG00000050767	COL23A1			ENSG00000026025	VIM
ENSG00000051108	HERPUD1			ENSG00000026652	AGPAT4
ENSG00000051128	HOMER3			ENSG00000027075	PRKCH
ENSG00000051620	HEBP2			ENSG00000028277	POU2F2
ENSG00000052795	FNIP2			ENSG00000029639	TFB1M
ENSG00000053524	MCF2L2			ENSG00000031081	ARHGAP31
ENSG00000054116	TRAPPC3			ENSG00000034063	UHRF1
ENSG00000054118	THRAP3			ENSG00000035403	VCL
ENSG00000054654	SYNE2			ENSG00000035664	DAPK2
ENSG00000055147	FAM114A2			ENSG00000035681	NSMAF
ENSG00000055917	PUM2			ENSG00000035862	TIMP2
ENSG00000059145	UNKL	immune-related gene		ENSG00000036828	CASR
ENSG00000060237	WNK1			ENSG00000037042	TUBG2
ENSG00000060558	GNA15			ENSG00000037637	FBXO42
ENSG00000061676	NCKAP1	immune-related gene		ENSG00000038210	PI4K2B
ENSG00000061936	SFSWAP			ENSG00000038382	TRIO
ENSG00000062650	WAPAL			ENSG00000038532	CLEC16A
ENSG00000063015	SEZ6			ENSG00000038945	MSR1	immune-related gene
ENSG00000063438	AHRR			ENSG00000039319	ZFYVE16
ENSG00000064419	TNPO3			ENSG00000039560	RAI14
ENSG00000064545	TMEM161A			ENSG00000040341	STAU2
ENSG00000064763	FAR2			ENSG00000042429	MED17
ENSG00000064989	CALCRL			ENSG00000042832	TG
ENSG00000065308	TRAM2			ENSG00000043355	ZIC2
ENSG00000065413	ANKRD44			ENSG00000044115	CTNNA1
ENSG00000065600	TMEM206			ENSG00000044446	PHKA2
ENSG00000065911	MTHFD2			ENSG00000046653	GPM6B
ENSG00000066084	DIP2B			ENSG00000047056	WDR37
ENSG00000066135	KDM4A			ENSG00000047249	ATP6V1H
ENSG00000066294	CD84			ENSG00000047410	TPR
ENSG00000066739	ATG2B			ENSG00000047579	DTNBP1
ENSG00000067057	PFKP			ENSG00000047932	GOPC	immune-related gene
ENSG00000067064	IDI1			ENSG00000048052	HDAC9
ENSG00000067225	PKM			ENSG00000048392	RRM2B
ENSG00000067704	IARS2			ENSG00000048707	VPS13D
ENSG00000068305	MEF2A	immune-related gene		ENSG00000048740	CELF2
ENSG00000069493	CLEC2D	immune-related gene		ENSG00000048828	FAM120A
ENSG00000070610	GBA2			ENSG00000049618	ARID1B
ENSG00000070808	CAMK2A	immune-related gene		ENSG00000049759	NEDD4L	immune-related gene
ENSG00000070831	CDC42	immune-related gene		ENSG00000050730	TNIP3	immune-related gene
ENSG00000071242	RPS6KA2	immune-related gene		ENSG00000050767	COL23A1
ENSG00000071246	VASH1			ENSG00000050820	BCAR1	immune-related gene
ENSG00000072110	ACTN1			ENSG00000051382	PIK3CB	immune-related gene
ENSG00000072182	ASIC4			ENSG00000052126	PLEKHA5
ENSG00000073711	PPP2R3A			ENSG00000053747	LAMA3
ENSG00000073803	MAP3K13			ENSG00000054277	OPN3
ENSG00000073910	FRY			ENSG00000054611	TBC1D22A
ENSG00000074054	CLASP1			ENSG00000054983	GALC
ENSG00000074201	CLNS1A			ENSG00000055070	SZRD1
ENSG00000074416	MGLL			ENSG00000055130	CUL1	immune-related gene
ENSG00000074603	DPP8			ENSG00000055208	TAB2	immune-related gene
ENSG00000074755	ZZEF1			ENSG00000055211	GINM1
ENSG00000075213	SEMA3A	immune-related gene		ENSG00000055332	EIF2AK2	immune-related gene
ENSG00000075884	ARHGAP15	immune-related gene		ENSG00000055917	PUM2
ENSG00000076258	FMO4			ENSG00000057252	SOAT1
ENSG00000076554	TPD52			ENSG00000057657	PRDM1
ENSG00000076928	ARHGEF1			ENSG00000057704	TMCC3
ENSG00000077232	DNAJC10			ENSG00000058063	ATP11B
ENSG00000077238	IL4R	immune-related gene		ENSG00000058091	CDK14
ENSG00000077264	PAK3	immune-related gene		ENSG00000058335	RASGRF1
ENSG00000077274	CAPN6			ENSG00000059377	TBXAS1
ENSG00000077312	SNRPA			ENSG00000059378	PARP12
ENSG00000077942	FBLN1			ENSG00000059728	MXD1
ENSG00000078098	FAP			ENSG00000060642	PIGV
ENSG00000078124	ACER3			ENSG00000060982	BCAT1
ENSG00000078269	SYNJ2			ENSG00000061936	SFSWAP
ENSG00000078487	ZCWPW1			ENSG00000062598	ELMO2	immune-related gene
ENSG00000078674	PCM1			ENSG00000062716	VMP1
ENSG00000078795	PKD2L2			ENSG00000063015	SEZ6
ENSG00000078900	TP73	immune-related gene		ENSG00000063169	GLTSCR1
ENSG00000078902	TOLLIP	immune-related gene		ENSG00000063438	AHRR
ENSG00000079101	CLUL1			ENSG00000064393	HIPK2
ENSG00000079689	SCGN			ENSG00000064687	ABCA7
ENSG00000080503	SMARCA2	immune-related gene		ENSG00000064703	DDX20
ENSG00000081051	AFP			ENSG00000064763	FAR2
ENSG00000081237	PTPRC	immune-related gene		ENSG00000064932	SBNO2
ENSG00000081479	LRP2			ENSG00000064995	TAF11
ENSG00000081913	PHLPP1	immune-related gene		ENSG00000064999	ANKS1A
ENSG00000082269	FAM135A			ENSG00000065320	NTN1	immune-related gene
ENSG00000082898	XPO1			ENSG00000065328	MCM10
ENSG00000083067	TRPM3			ENSG00000065413	ANKRD44
ENSG00000083123	BCKDHB			ENSG00000065518	NDUFB4
ENSG00000083312	TNPO1			ENSG00000065526	SPEN
ENSG00000083520	DIS3			ENSG00000065802	ASB1	immune-related gene
ENSG00000084072	PPIE			ENSG00000065809	FAM107B
ENSG00000085231	TAF9			ENSG00000065833	ME1
ENSG00000085433	WDR47			ENSG00000065882	TBC1D1
ENSG00000085644	ZNF213			ENSG00000065911	MTHFD2
ENSG00000085978	ATG16L1	immune-related gene		ENSG00000065923	SLC9A7
ENSG00000086102	NFX1			ENSG00000065989	PDE4A
ENSG00000086300	SNX10			ENSG00000066044	ELAVL1	immune-related gene
ENSG00000086475	SEPHS1			ENSG00000066697	MSANTD3
ENSG00000086544	ITPKC			ENSG00000066923	STAG3
ENSG00000086548	CEACAM6			ENSG00000067066	SP100
ENSG00000087237	CETP			ENSG00000067082	KLF6
ENSG00000089041	P2RX7	immune-related gene		ENSG00000067167	TRAM1
ENSG00000089127	OAS1	immune-related gene		ENSG00000067208	EVI5
ENSG00000089250	NOS1			ENSG00000067445	TRO
ENSG00000090060	PAPOLA			ENSG00000067533	RRP15
ENSG00000090447	TFAP4			ENSG00000068137	PLEKHH3
ENSG00000090534	THPO			ENSG00000068366	ACSL4
ENSG00000090565	RAB11FIP3			ENSG00000068796	KIF2A	immune-related gene
ENSG00000090581	GNPTG			ENSG00000069122	GPR116
ENSG00000090615	GOLGA3			ENSG00000069248	NUP133
ENSG00000091039	OSBPL8			ENSG00000069424	KCNAB2
ENSG00000091436	MLTK			ENSG00000069712	KIAA1107
ENSG00000091527	CDV3			ENSG00000069869	NEDD4	immune-related gene
ENSG00000092148	HECTD1	immune-related gene		ENSG00000069956	MAPK6
ENSG00000092199	HNRNPC			ENSG00000069966	GNB5
ENSG00000092201	SUPT16H			ENSG00000070193	FGF10	immune-related gene
ENSG00000092841	MYL6			ENSG00000070476	ZXDC
ENSG00000092931	MFSD11			ENSG00000070614	NDST1
ENSG00000092964	DPYSL2			ENSG00000070718	AP3M2
ENSG00000095139	ARCN1			ENSG00000070748	CHAT
ENSG00000095319	NUP188			ENSG00000070808	CAMK2A	immune-related gene
ENSG00000095637	SORBS1			ENSG00000070882	OSBPL3
ENSG00000096093	EFHC1			ENSG00000070961	ATP2B1
ENSG00000097007	ABL1	immune-related gene		ENSG00000071051	NCK2
ENSG00000097021	ACOT7			ENSG00000071073	MGAT4A
ENSG00000099814	CEP170B			ENSG00000071205	ARHGAP10
ENSG00000100024	UPB1			ENSG00000071991	CDH19
ENSG00000100058	CRYBB2P1			ENSG00000072042	RDH11
ENSG00000100077	ADRBK2			ENSG00000072364	AFF4
ENSG00000100092	SH3BP1			ENSG00000072952	MRVI1
ENSG00000100095	SEZ6L			ENSG00000072954	TMEM38A
ENSG00000100101	NOL12			ENSG00000073417	PDE8A
ENSG00000100106	TRIOBP			ENSG00000073734	ABCB11
ENSG00000100207	TCF20			ENSG00000073737	DHRS9
ENSG00000100280	AP1B1	immune-related gene		ENSG00000073849	ST6GAL1
ENSG00000100296	THOC5			ENSG00000073910	FRY
ENSG00000100380	ST13			ENSG00000074410	CA12
ENSG00000100393	EP300	immune-related gene		ENSG00000074657	ZNF532
ENSG00000100592	DAAM1			ENSG00000074706	IPCEF1
ENSG00000100596	SPTLC2			ENSG00000074771	NOX3
ENSG00000100603	SNW1			ENSG00000074935	TUBE1
ENSG00000100811	YY1	immune-related gene		ENSG00000075240	GRAMD4
ENSG00000100888	CHD8			ENSG00000075292	ZNF638
ENSG00000101052	IFT52			ENSG00000075391	RASAL2
ENSG00000101109	STK4			ENSG00000075624	ACTB	immune-related gene
ENSG00000101161	PRPF6			ENSG00000075785	RAB7A	immune-related gene
ENSG00000101331	CCM2L			ENSG00000075891	PAX2
ENSG00000101336	HCK	immune-related gene		ENSG00000075914	EXOSC7
ENSG00000101442	ACTR5			ENSG00000076641	PAG1	immune-related gene
ENSG00000101489	CELF4			ENSG00000076662	ICAM3	immune-related gene
ENSG00000101558	VAPA			ENSG00000076685	NT5C2
ENSG00000101639	CEP192			ENSG00000077092	RARB
ENSG00000101928	MOSPD1			ENSG00000077097	TOP2B
ENSG00000101935	AMMECR1			ENSG00000077238	IL4R	immune-related gene
ENSG00000101972	STAG2			ENSG00000077420	APBB1IP
ENSG00000102003	SYP	immune-related gene		ENSG00000077454	LRCH4
ENSG00000102471	NDFIP2			ENSG00000077549	CAPZB
ENSG00000102572	STK24			ENSG00000077782	FGFR1	immune-related gene
ENSG00000102710	SUPT20H			ENSG00000078070	MCCC1
ENSG00000102804	TSC22D1			ENSG00000078098	FAP
ENSG00000103507	BCKDK			ENSG00000078177	N4BP2
ENSG00000104043	ATP8B4			ENSG00000078269	SYNJ2
ENSG00000104388	RAB2A			ENSG00000078295	ADCY2	immune-related gene
ENSG00000104408	EIF3E			ENSG00000078304	PPP2R5C	immune-related gene
ENSG00000104415	WISP1			ENSG00000078399	HOXA9	immune-related gene
ENSG00000104419	NDRG1			ENSG00000078579	FGF20	immune-related gene
ENSG00000104723	TUSC3			ENSG00000078674	PCM1
ENSG00000104728	ARHGEF10			ENSG00000078747	ITCH	immune-related gene
ENSG00000104946	TBC1D17			ENSG00000079101	CLUL1
ENSG00000104951	IL4I1			ENSG00000079215	SLC1A3
ENSG00000105085	MED26			ENSG00000079263	SP140
ENSG00000105088	OLFM2			ENSG00000079308	TNS1
ENSG00000105357	MYH14			ENSG00000079332	SAR1A
ENSG00000105369	CD79A	immune-related gene		ENSG00000079459	FDFT1
ENSG00000105373	GLTSCR2			ENSG00000079616	KIF22	immune-related gene
ENSG00000105379	ETFB			ENSG00000080189	SLC35C2
ENSG00000105501	SIGLEC5	immune-related gene		ENSG00000080345	RIF1
ENSG00000105639	JAK3	immune-related gene		ENSG00000080371	RAB21
ENSG00000105676	ARMC6			ENSG00000080503	SMARCA2	immune-related gene
ENSG00000105875	WDR91			ENSG00000080546	SESN1
ENSG00000106003	LFNG			ENSG00000080815	PSEN1
ENSG00000106012	IQCE			ENSG00000080947	CROCCP3
ENSG00000106066	CPVL			ENSG00000081014	AP4E1
ENSG00000106069	CHN2			ENSG00000081154	PCNP
ENSG00000106080	FKBP14			ENSG00000081189	MEF2C	immune-related gene
ENSG00000106086	PLEKHA8			ENSG00000081237	PTPRC	immune-related gene
ENSG00000106105	GARS			ENSG00000081377	CDC14B
ENSG00000106211	HSPB1			ENSG00000081853	PCDHGA2
ENSG00000106328	FSCN3			ENSG00000081913	PHLPP1	immune-related gene
ENSG00000106330	MOSPD3			ENSG00000082781	ITGB5	immune-related gene
ENSG00000106355	LSM5			ENSG00000082898	XPO1
ENSG00000106635	BCL7B			ENSG00000083168	KAT6A
ENSG00000106733	NMRK1			ENSG00000083307	GRHL2
ENSG00000106991	ENG			ENSG00000083635	NUFIP1
ENSG00000106992	AK1			ENSG00000083720	OXCT1
ENSG00000107077	KDM4C			ENSG00000083799	CYLD	immune-related gene
ENSG00000107104	KANK1			ENSG00000084070	SMAP2	immune-related gene
ENSG00000107185	RGP1			ENSG00000084112	SSH1
ENSG00000107249	GLIS3			ENSG00000084234	APLP2
ENSG00000107290	SETX			ENSG00000084623	EIF3I
ENSG00000107562	CXCL12	immune-related gene		ENSG00000084731	KIF3C	immune-related gene
ENSG00000107651	SEC23IP			ENSG00000085365	SCAMP1
ENSG00000107719	PALD1			ENSG00000085449	WDFY1
ENSG00000107736	CDH23			ENSG00000085511	MAP3K4	immune-related gene
ENSG00000107798	LIPA			ENSG00000085831	TTC39A
ENSG00000107854	TNKS2			ENSG00000085872	CHERP
ENSG00000107897	ACBD5			ENSG00000086200	IPO11
ENSG00000107937	GTPBP4			ENSG00000086288	NME8
ENSG00000107959	PITRM1			ENSG00000086289	EPDR1
ENSG00000108239	TBC1D12			ENSG00000086730	LAT2	immune-related gene
ENSG00000108559	NUP88			ENSG00000086758	HUWE1	immune-related gene
ENSG00000108839	ALOX12			ENSG00000087338	GMCL1
ENSG00000109101	FOXN1			ENSG00000087502	ERGIC2
ENSG00000109193	SULT1E1			ENSG00000087510	TFAP2C
ENSG00000109511	ANXA10			ENSG00000087903	RFX2
ENSG00000109920	FNBP4			ENSG00000088298	EDEM2
ENSG00000110080	ST3GAL4			ENSG00000088387	DOCK9
ENSG00000110375	UPK2			ENSG00000088451	TGDS
ENSG00000110497	AMBRA1			ENSG00000088930	XRN2
ENSG00000110514	MADD			ENSG00000089053	ANAPC5	immune-related gene
ENSG00000110583	NAA40			ENSG00000089101	C20orf26
ENSG00000110713	NUP98			ENSG00000089154	GCN1L1
ENSG00000110851	PRDM4			ENSG00000089327	FXYD5
ENSG00000110906	KCTD10			ENSG00000089486	CDIP1
ENSG00000111186	WNT5B			ENSG00000089558	KCNH4
ENSG00000111231	GPN3			ENSG00000089902	RCOR1	immune-related gene
ENSG00000111237	VPS29			ENSG00000090104	RGS1
ENSG00000111331	OAS3	immune-related gene		ENSG00000090339	ICAM1	immune-related gene
ENSG00000111335	OAS2	immune-related gene		ENSG00000090565	RAB11FIP3
ENSG00000111344	RASAL1			ENSG00000090686	USP48
ENSG00000111540	RAB5B			ENSG00000091039	OSBPL8
ENSG00000111615	KRR1			ENSG00000091844	RGS17
ENSG00000111653	ING4	immune-related gene		ENSG00000091879	ANGPT2
ENSG00000111696	NT5DC3			ENSG00000091986	CCDC80
ENSG00000111879	FAM184A			ENSG00000092203	TOX4
ENSG00000111886	GABRR2			ENSG00000092607	TBX15
ENSG00000111906	HDDC2			ENSG00000092964	DPYSL2
ENSG00000111907	TPD52L1			ENSG00000092969	TGFB2
ENSG00000112096	SOD2			ENSG00000093072	CECR1
ENSG00000112159	MDN1			ENSG00000093144	ECHDC1
ENSG00000112182	BACH2			ENSG00000094631	HDAC6
ENSG00000112242	E2F3			ENSG00000095370	SH2D3C
ENSG00000112297	AIM1			ENSG00000095464	PDE6C
ENSG00000112309	B3GAT2			ENSG00000096070	BRPF3
ENSG00000112337	SLC17A2			ENSG00000096746	HNRNPH3
ENSG00000112651	MRPL2			ENSG00000096872	IFT74
ENSG00000112763	BTN2A1	immune-related gene		ENSG00000099204	ABLIM1
ENSG00000112936	C7	immune-related gene		ENSG00000099246	RAB18
ENSG00000113068	PFDN1			ENSG00000099365	STX1B
ENSG00000113296	THBS4			ENSG00000099377	HSD3B7
ENSG00000113615	SEC24A	immune-related gene		ENSG00000099812	MISP
ENSG00000113716	HMGXB3			ENSG00000099954	CECR2
ENSG00000113721	PDGFRB	immune-related gene		ENSG00000099968	BCL2L13
ENSG00000113758	DBN1			ENSG00000100014	SPECC1L
ENSG00000113916	BCL6			ENSG00000100024	UPB1
ENSG00000114026	OGG1			ENSG00000100101	NOL12
ENSG00000114316	USP4	immune-related gene		ENSG00000100106	TRIOBP
ENSG00000114439	BBX			ENSG00000100154	TTC28
ENSG00000114487	MORC1			ENSG00000100191	SLC5A4
ENSG00000114744	COMMD2			ENSG00000100220	RTCB
ENSG00000114745	GORASP1			ENSG00000100225	FBXO7	immune-related gene
ENSG00000114770	ABCC5			ENSG00000100280	AP1B1	immune-related gene
ENSG00000114861	FOXP1			ENSG00000100365	NCF4	immune-related gene
ENSG00000114933	INO80D			ENSG00000100368	CSF2RB	immune-related gene
ENSG00000114978	MOB1A			ENSG00000100413	POLR3H	immune-related gene
ENSG00000115020	PIKFYVE			ENSG00000100418	DESI1
ENSG00000115232	ITGA4	immune-related gene		ENSG00000100461	RBM23
ENSG00000115263	GCG			ENSG00000100478	AP4S1
ENSG00000115267	IFIH1	immune-related gene		ENSG00000100503	NIN
ENSG00000115290	GRB14			ENSG00000100568	VTI1B
ENSG00000115310	RTN4			ENSG00000100592	DAAM1
ENSG00000115318	LOXL3			ENSG00000100599	RIN3
ENSG00000115355	CCDC88A	immune-related gene		ENSG00000100605	ITPK1
ENSG00000115514	TXNDC9			ENSG00000100644	HIF1A	immune-related gene
ENSG00000115520	COQ10B			ENSG00000100697	DICER1	immune-related gene
ENSG00000115524	SF3B1			ENSG00000100714	MTHFD1
ENSG00000115590	IL1R2	immune-related gene		ENSG00000100731	PCNX
ENSG00000115594	IL1R1	immune-related gene		ENSG00000100749	VRK1
ENSG00000115919	KYNU			ENSG00000100784	RPS6KA5	immune-related gene
ENSG00000116044	NFE2L2	immune-related gene		ENSG00000100802	C14orf93
ENSG00000116183	PAPPA2			ENSG00000100888	CHD8
ENSG00000116213	WRAP73			ENSG00000100926	TM9SF1
ENSG00000116406	EDEM3			ENSG00000100941	PNN
ENSG00000116478	HDAC1	immune-related gene		ENSG00000100991	TRPC4AP
ENSG00000116698	SMG7			ENSG00000100997	ABHD12
ENSG00000116833	NR5A2			ENSG00000101040	ZMYND8
ENSG00000116852	KIF21B			ENSG00000101181	MTG2
ENSG00000116977	LGALS8	immune-related gene		ENSG00000101191	DIDO1
ENSG00000117298	ECE1			ENSG00000101251	SEL1L2
ENSG00000117410	ATP6V0B			ENSG00000101337	TM9SF4
ENSG00000117411	B4GALT2			ENSG00000101346	POFUT1
ENSG00000117586	TNFSF4			ENSG00000101413	RPRD1B
ENSG00000117643	MAN1C1			ENSG00000101444	AHCY
ENSG00000117697	NSL1			ENSG00000101493	ZNF516
ENSG00000117984	CTSD	immune-related gene		ENSG00000101558	VAPA
ENSG00000118094	TREH			ENSG00000101577	LPIN2
ENSG00000118308	LRMP			ENSG00000101605	MYOM1
ENSG00000118564	FBXL5	immune-related gene		ENSG00000101638	ST8SIA5
ENSG00000119203	CPSF3			ENSG00000101665	SMAD7	immune-related gene
ENSG00000119285	HEATR1			ENSG00000101695	RNF125	immune-related gene
ENSG00000119392	GLE1			ENSG00000101751	POLI
ENSG00000119396	RAB14			ENSG00000101773	RBBP8
ENSG00000119397	CNTRL			ENSG00000101868	POLA1
ENSG00000119487	MAPKAP1	immune-related gene		ENSG00000101966	XIAP	immune-related gene
ENSG00000119705	SLIRP			ENSG00000101972	STAG2
ENSG00000119707	RBM25			ENSG00000102145	GATA1
ENSG00000119771	KLHL29			ENSG00000102172	SMS
ENSG00000119906	FAM178A			ENSG00000102174	PHEX
ENSG00000119938	PPP1R3C			ENSG00000102181	CD99L2
ENSG00000119943	PYROXD2			ENSG00000102401	ARMCX3
ENSG00000120306	CYSTM1			ENSG00000102524	TNFSF13B
ENSG00000120526	NUDCD1			ENSG00000102606	ARHGEF7
ENSG00000120539	MASTL			ENSG00000102786	INTS6
ENSG00000120690	ELF1	immune-related gene		ENSG00000102858	MGRN1	immune-related gene
ENSG00000120694	HSPH1			ENSG00000102897	LYRM1
ENSG00000120733	KDM3B			ENSG00000102908	NFAT5	immune-related gene
ENSG00000120899	PTK2B	immune-related gene		ENSG00000102984	ZNF821
ENSG00000120948	TARDBP			ENSG00000103051	COG4
ENSG00000121716	PILRB			ENSG00000103184	SEC14L5
ENSG00000121851	POLR3GL	immune-related gene		ENSG00000103202	NME4
ENSG00000121892	PDS5A			ENSG00000103222	ABCC1
ENSG00000121940	CLCC1			ENSG00000103375	AQP8
ENSG00000122026	RPL21			ENSG00000103415	HMOX2
ENSG00000122033	MTIF3			ENSG00000103485	QPRT
ENSG00000122034	GTF3A			ENSG00000103495	MAZ
ENSG00000122068	FYTTD1			ENSG00000103502	CDIPT
ENSG00000122218	COPA			ENSG00000103507	BCKDK
ENSG00000122299	ZC3H7A			ENSG00000103642	LACTB
ENSG00000122417	ODF2L			ENSG00000103657	HERC1	immune-related gene
ENSG00000122550	KLHL7			ENSG00000103769	RAB11A	immune-related gene
ENSG00000122862	SRGN			ENSG00000103811	CTSH	immune-related gene
ENSG00000123213	NLN			ENSG00000103942	HOMER2
ENSG00000123352	SPATS2			ENSG00000104043	ATP8B4
ENSG00000123411	IKZF4			ENSG00000104133	SPG11
ENSG00000123815	ADCK4			ENSG00000104205	SGK3
ENSG00000123989	CHPF			ENSG00000104237	RP1
ENSG00000124208	TMEM189-UBE2V1			ENSG00000104324	CPQ
ENSG00000124486	USP9X			ENSG00000104388	RAB2A
ENSG00000124496	TRERF1			ENSG00000104447	TRPS1
ENSG00000124571	XPO5			ENSG00000104450	SPAG1
ENSG00000124587	PEX6			ENSG00000104517	UBR5
ENSG00000124678	TCP11			ENSG00000104537	ANXA13
ENSG00000124784	RIOK1			ENSG00000104549	SQLE
ENSG00000124812	CRISP1			ENSG00000104660	LEPROTL1
ENSG00000124818	OPN5			ENSG00000104687	GSR
ENSG00000125482	TTF1			ENSG00000104765	BNIP3L
ENSG00000125695	RP11-51F16.8			ENSG00000104980	TIMM44
ENSG00000125772	GPCPD1			ENSG00000105254	TBCB
ENSG00000125826	RBCK1	immune-related gene		ENSG00000105401	CDC37
ENSG00000125834	STK35			ENSG00000105514	RAB3D
ENSG00000125841	NRSN2			ENSG00000105518	TMEM205
ENSG00000125952	MAX			ENSG00000105610	KLF1
ENSG00000125954	CHURC1-FNTB			ENSG00000105612	DNASE2
ENSG00000125999	BPIFB1			ENSG00000105649	RAB3A
ENSG00000126091	ST3GAL3			ENSG00000105650	PDE4C
ENSG00000126261	UBA2			ENSG00000105698	USF2
ENSG00000127743	IL17B			ENSG00000105699	LSR
ENSG00000128245	YWHAH			ENSG00000105723	GSK3A	immune-related gene
ENSG00000128254	C22orf24			ENSG00000105750	ZNF85
ENSG00000128271	ADORA2A			ENSG00000105793	GTPBP10
ENSG00000128512	DOCK4			ENSG00000105810	CDK6	immune-related gene
ENSG00000128573	FOXP2			ENSG00000105819	PMPCB
ENSG00000128578	STRIP2			ENSG00000105821	DNAJC2
ENSG00000128595	CALU			ENSG00000105829	BET1
ENSG00000128602	SMO			ENSG00000105835	NAMPT	immune-related gene
ENSG00000128815	WDFY4			ENSG00000105851	PIK3CG	immune-related gene
ENSG00000128908	INO80			ENSG00000105889	STEAP1B
ENSG00000128915	NARG2			ENSG00000105929	ATP6V0A4
ENSG00000128918	ALDH1A2			ENSG00000105953	OGDH
ENSG00000128928	IVD			ENSG00000105967	TFEC
ENSG00000128951	DUT			ENSG00000106028	SSBP1
ENSG00000129116	PALLD			ENSG00000106049	HIBADH
ENSG00000129422	MTUS1			ENSG00000106144	CASP2
ENSG00000129534	MIS18BP1			ENSG00000106299	WASL	immune-related gene
ENSG00000129675	ARHGEF6			ENSG00000106333	PCOLCE
ENSG00000129696	TTI2			ENSG00000106336	FBXO24
ENSG00000130226	DPP6			ENSG00000106346	USP42
ENSG00000130332	LSM7			ENSG00000106366	SERPINE1	immune-related gene
ENSG00000130396	MLLT4			ENSG00000106462	EZH2
ENSG00000130511	SSBP4			ENSG00000106546	AHR	immune-related gene
ENSG00000130513	GDF15			ENSG00000106571	GLI3
ENSG00000130713	EXOSC2			ENSG00000106615	RHEB
ENSG00000131018	SYNE1			ENSG00000106617	PRKAG2
ENSG00000131051	RBM39			ENSG00000106682	EIF4H
ENSG00000131127	ZNF141			ENSG00000106683	LIMK1	immune-related gene
ENSG00000131188	PRR7			ENSG00000106853	PTGR1
ENSG00000131374	TBC1D5			ENSG00000106868	SUSD1
ENSG00000131375	CAPN7			ENSG00000106992	AK1
ENSG00000131386	GALNT15			ENSG00000107077	KDM4C
ENSG00000131398	KCNC3			ENSG00000107130	NCS1
ENSG00000131471	AOC3			ENSG00000107249	GLIS3
ENSG00000131503	ANKHD1			ENSG00000107263	RAPGEF1
ENSG00000131873	CHSY1			ENSG00000107338	SHB
ENSG00000131981	LGALS3	immune-related gene		ENSG00000107611	CUBN
ENSG00000132003	ZSWIM4			ENSG00000107736	CDH23
ENSG00000132139	GAS2L2			ENSG00000107738	C10orf54
ENSG00000132164	SLC6A11			ENSG00000107798	LIPA
ENSG00000132205	EMILIN2			ENSG00000107864	CPEB3
ENSG00000132256	TRIM5	immune-related gene		ENSG00000107890	ANKRD26
ENSG00000132530	XAF1			ENSG00000107968	MAP3K8	immune-related gene
ENSG00000132669	RIN2			ENSG00000108018	SORCS1
ENSG00000132702	HAPLN2			ENSG00000108100	CCNY
ENSG00000132716	DCAF8			ENSG00000108175	ZMIZ1
ENSG00000132819	RBM38			ENSG00000108179	PPIF
ENSG00000133019	CHRM3			ENSG00000108370	RGS9
ENSG00000133055	MYBPH			ENSG00000108395	TRIM37	immune-related gene
ENSG00000133422	MORC2			ENSG00000108474	PIGL
ENSG00000133424	LARGE			ENSG00000108578	BLMH	immune-related gene
ENSG00000133454	MYO18B			ENSG00000108582	CPD
ENSG00000133706	LARS			ENSG00000108702	CCL1	immune-related gene
ENSG00000133789	SWAP70	immune-related gene		ENSG00000109118	PHF12
ENSG00000133794	ARNTL			ENSG00000109320	NFKB1	immune-related gene
ENSG00000133816	MICAL2			ENSG00000109332	UBE2D3	immune-related gene
ENSG00000133874	RNF122			ENSG00000109390	NDUFC1
ENSG00000134030	CTIF			ENSG00000109756	RAPGEF2
ENSG00000134070	IRAK2	immune-related gene		ENSG00000109906	ZBTB16	immune-related gene
ENSG00000134108	ARL8B			ENSG00000110066	SUV420H1
ENSG00000134369	NAV1			ENSG00000110315	RNF141
ENSG00000134376	CRB1			ENSG00000110324	IL10RA
ENSG00000134815	DHX34			ENSG00000110367	DDX6
ENSG00000134882	UBAC2			ENSG00000110395	CBL	immune-related gene
ENSG00000134910	STT3A			ENSG00000110435	PDHX
ENSG00000134996	OSTF1			ENSG00000110484	SCGB2A2
ENSG00000135048	TMEM2			ENSG00000110497	AMBRA1
ENSG00000135144	DTX1			ENSG00000110619	CARS
ENSG00000135205	CCDC146			ENSG00000110713	NUP98
ENSG00000135250	SRPK2	immune-related gene		ENSG00000110721	CHKA
ENSG00000135253	KCP			ENSG00000110756	HPS5
ENSG00000135316	SYNCRIP			ENSG00000110768	GTF2H1
ENSG00000135334	AKIRIN2	immune-related gene		ENSG00000110841	PPFIBP1
ENSG00000135482	ZC3H10			ENSG00000110880	CORO1C
ENSG00000135525	MAP7			ENSG00000110911	SLC11A2
ENSG00000135631	RAB11FIP5			ENSG00000110934	BIN2
ENSG00000135698	MPHOSPH6			ENSG00000110958	PTGES3
ENSG00000135709	KIAA0513			ENSG00000111052	LIN7A
ENSG00000135747	ZNF670			ENSG00000111058	ACSS3
ENSG00000135829	DHX9	immune-related gene		ENSG00000111110	PPM1H
ENSG00000135838	NPL			ENSG00000111145	ELK3
ENSG00000135842	FAM129A			ENSG00000111249	CUX2
ENSG00000135870	RC3H1			ENSG00000111252	SH2B3
ENSG00000135898	GPR55			ENSG00000111300	NAA25
ENSG00000135916	ITM2C			ENSG00000111450	STX2
ENSG00000136040	PLXNC1			ENSG00000111452	GPR133
ENSG00000136045	PWP1			ENSG00000111537	IFNG	immune-related gene
ENSG00000136051	KIAA1033			ENSG00000111615	KRR1
ENSG00000136122	BORA			ENSG00000111684	LPCAT3
ENSG00000136156	ITM2B			ENSG00000111817	DSE
ENSG00000136193	SCRN1			ENSG00000111859	NEDD9
ENSG00000136490	LIMD2			ENSG00000111880	RNGTT
ENSG00000136574	GATA4	immune-related gene		ENSG00000111912	NCOA7
ENSG00000136628	EPRS			ENSG00000111962	UST
ENSG00000136653	RASSF5			ENSG00000112038	OPRM1
ENSG00000136802	LRRC8A			ENSG00000112079	STK38
ENSG00000136828	RALGPS1			ENSG00000112081	SRSF3
ENSG00000136895	GARNL3			ENSG00000112096	SOD2
ENSG00000136928	GABBR2			ENSG00000112149	CD83
ENSG00000136935	GOLGA1			ENSG00000112406	HECA
ENSG00000137076	TLN1			ENSG00000112419	PHACTR2
ENSG00000137098	SPAG8			ENSG00000112531	QKI
ENSG00000137103	TMEM8B			ENSG00000112658	SRF
ENSG00000137133	HINT2			ENSG00000112659	CUL9
ENSG00000137135	ARHGEF39			ENSG00000112667	DNPH1
ENSG00000137171	KLC4	immune-related gene		ENSG00000112759	SLC29A1
ENSG00000137274	BPHL			ENSG00000112852	PCDHB2
ENSG00000137449	CPEB2			ENSG00000112972	HMGCS1
ENSG00000137513	NARS2			ENSG00000112977	DAP
ENSG00000137817	PARP6			ENSG00000112996	MRPS30
ENSG00000137819	PAQR5			ENSG00000113163	COL4A3BP
ENSG00000137869	CYP19A1			ENSG00000113231	PDE8B
ENSG00000138061	CYP1B1			ENSG00000113318	MSH3
ENSG00000138119	MYOF			ENSG00000113319	RASGRF2
ENSG00000138135	CH25H			ENSG00000113391	FAM172A
ENSG00000138356	AOX1			ENSG00000113396	SLC27A6
ENSG00000138640	FAM13A			ENSG00000113448	PDE4D
ENSG00000138641	HERC3	immune-related gene		ENSG00000113494	PRLR
ENSG00000138642	HERC6	immune-related gene		ENSG00000113532	ST8SIA4
ENSG00000138764	CCNG2			ENSG00000113594	LIFR
ENSG00000138768	USO1			ENSG00000113600	C9	immune-related gene
ENSG00000139117	CPNE8			ENSG00000113615	SEC24A	immune-related gene
ENSG00000139278	GLIPR1			ENSG00000113645	WWC1
ENSG00000139318	DUSP6	immune-related gene		ENSG00000113648	H2AFY
ENSG00000139613	SMARCC2			ENSG00000113658	SMAD5
ENSG00000139641	ESYT1			ENSG00000113763	UNC5A
ENSG00000139832	RAB20			ENSG00000113924	HGD
ENSG00000140009	ESR2			ENSG00000113946	CLDN16
ENSG00000140105	WARS			ENSG00000114030	KPNA1	immune-related gene
ENSG00000140367	UBE2Q2	immune-related gene		ENSG00000114127	XRN1
ENSG00000140443	IGF1R	immune-related gene		ENSG00000114251	WNT5A
ENSG00000140519	RHCG			ENSG00000114302	PRKAR2A	immune-related gene
ENSG00000140718	FTO			ENSG00000114423	CBLB	immune-related gene
ENSG00000141040	ZNF287			ENSG00000114450	GNB4
ENSG00000141150	RASL10B			ENSG00000114738	MAPKAPK3	immune-related gene
ENSG00000141293	SKAP1			ENSG00000114861	FOXP1
ENSG00000141526	SLC16A3			ENSG00000114933	INO80D
ENSG00000141551	CSNK1D			ENSG00000114942	EEF1B2
ENSG00000141574	SECTM1			ENSG00000114956	DGUOK
ENSG00000141979	CTD-3222D19.2			ENSG00000114978	MOB1A
ENSG00000142208	AKT1	immune-related gene		ENSG00000115020	PIKFYVE
ENSG00000142224	IL19	immune-related gene		ENSG00000115129	TP53I3
ENSG00000142549	IGLON5			ENSG00000115165	CYTIP	immune-related gene
ENSG00000142655	PEX14			ENSG00000115232	ITGA4	immune-related gene
ENSG00000143149	ALDH9A1			ENSG00000115267	IFIH1	immune-related gene
ENSG00000143162	CREG1			ENSG00000115419	GLS
ENSG00000143167	GPA33			ENSG00000115421	PAPOLG
ENSG00000143179	UCK2			ENSG00000115425	PECR
ENSG00000143183	TMCO1			ENSG00000115464	USP34
ENSG00000143190	POU2F1			ENSG00000115541	HSPE1
ENSG00000143198	MGST3			ENSG00000115590	IL1R2	immune-related gene
ENSG00000143318	CASQ1			ENSG00000115594	IL1R1	immune-related gene
ENSG00000143355	LHX9			ENSG00000115738	ID2
ENSG00000143379	SETDB1			ENSG00000115756	HPCAL1
ENSG00000143418	CERS2			ENSG00000115761	NOL10
ENSG00000143486	EIF2D			ENSG00000115841	RMDN2
ENSG00000143502	SUSD4			ENSG00000115902	SLC1A4
ENSG00000143569	UBAP2L			ENSG00000115919	KYNU
ENSG00000143575	HAX1			ENSG00000115963	RND3
ENSG00000143669	LYST			ENSG00000115998	C2orf42
ENSG00000143740	SNAP47			ENSG00000116001	TIA1
ENSG00000143776	CDC42BPA			ENSG00000116016	EPAS1
ENSG00000143786	CNIH3			ENSG00000116044	NFE2L2	immune-related gene
ENSG00000143799	PARP1			ENSG00000116251	RPL22
ENSG00000143816	WNT9A			ENSG00000116260	QSOX1
ENSG00000143858	SYT2			ENSG00000116406	EDEM3
ENSG00000144036	EXOC6B			ENSG00000116473	RAP1A	immune-related gene
ENSG00000144136	SLC20A1			ENSG00000116478	HDAC1	immune-related gene
ENSG00000144218	AFF3			ENSG00000116489	CAPZA1	immune-related gene
ENSG00000144355	DLX1			ENSG00000116711	PLA2G4A	immune-related gene
ENSG00000144589	STK11IP			ENSG00000116783	TNNI3K
ENSG00000144711	IQSEC1			ENSG00000116830	TTF2
ENSG00000144724	PTPRG			ENSG00000116985	BMP8B
ENSG00000144730	IL17RD			ENSG00000116991	SIPA1L2
ENSG00000144893	MED12L			ENSG00000117009	KMO
ENSG00000145191	EIF2B5			ENSG00000117010	ZNF684
ENSG00000145337	PYURF			ENSG00000117020	AKT3	immune-related gene
ENSG00000145391	SETD7			ENSG00000117091	CD48
ENSG00000145416	2020-03-01			ENSG00000117153	KLHL12
ENSG00000145439	CBR4			ENSG00000117226	GBP3
ENSG00000145495	2020-03-06			ENSG00000117305	HMGCL
ENSG00000145703	IQGAP2			ENSG00000117360	PRPF3
ENSG00000145715	RASA1			ENSG00000117385	LEPRE1
ENSG00000145740	SLC30A5			ENSG00000117407	ARTN
ENSG00000145819	ARHGAP26			ENSG00000117461	PIK3R3	immune-related gene
ENSG00000146072	TNFRSF21			ENSG00000117475	BLZF1
ENSG00000146094	DOK3	immune-related gene		ENSG00000117477	CCDC181
ENSG00000146233	CYP39A1			ENSG00000117479	SLC19A2
ENSG00000146376	ARHGAP18			ENSG00000117523	PRRC2C
ENSG00000146409	SLC18B1			ENSG00000117528	ABCD3
ENSG00000146701	MDH2			ENSG00000117586	TNFSF4
ENSG00000147133	TAF1			ENSG00000117592	PRDX6
ENSG00000147162	OGT			ENSG00000117602	RCAN3
ENSG00000147224	PRPS1			ENSG00000117625	RCOR3
ENSG00000147234	FRMPD3			ENSG00000117697	NSL1
ENSG00000147274	RBMX			ENSG00000117713	ARID1A
ENSG00000147459	DOCK5			ENSG00000117758	STX12
ENSG00000147488	ST18			ENSG00000117791	MARC2
ENSG00000147536	GINS4			ENSG00000118017	A4GNT
ENSG00000147614	ATP6V0D2			ENSG00000118058	KMT2A
ENSG00000147650	LRP12			ENSG00000118242	MREG
ENSG00000147655	RSPO2			ENSG00000118257	NRP2
ENSG00000147852	VLDLR	immune-related gene		ENSG00000118263	KLF7
ENSG00000147854	UHRF2			ENSG00000118418	HMGN3
ENSG00000148180	GSN			ENSG00000118518	RNF146
ENSG00000148297	MED22			ENSG00000118620	ZNF430
ENSG00000148335	NTMT1			ENSG00000118655	DCLRE1B
ENSG00000148396	SEC16A			ENSG00000118689	FOXO3	immune-related gene
ENSG00000148468	FAM171A1			ENSG00000118705	RPN2
ENSG00000148680	HTR7			ENSG00000118785	SPP1	immune-related gene
ENSG00000148737	TCF7L2			ENSG00000118898	PPL	immune-related gene
ENSG00000148848	ADAM12			ENSG00000118900	UBN1
ENSG00000149084	HSD17B12			ENSG00000118965	WDR35
ENSG00000149187	CELF1			ENSG00000119048	UBE2B	immune-related gene
ENSG00000149269	PAK1	immune-related gene		ENSG00000119139	TJP2
ENSG00000149547	EI24			ENSG00000119321	FKBP15
ENSG00000149554	CHEK1			ENSG00000119333	WDR34	immune-related gene
ENSG00000149599	DUSP15			ENSG00000119487	MAPKAP1	immune-related gene
ENSG00000150540	HNMT			ENSG00000119541	VPS4B
ENSG00000150625	GPM6A			ENSG00000119636	CCDC176
ENSG00000150667	FSIP1			ENSG00000119669	IRF2BPL
ENSG00000151164	RAD9B			ENSG00000119685	TTLL5
ENSG00000151461	UPF2			ENSG00000119707	RBM25
ENSG00000151657	KIN			ENSG00000119715	ESRRB
ENSG00000151693	ASAP2			ENSG00000119844	AFTPH
ENSG00000151726	ACSL1			ENSG00000119899	SLC17A5
ENSG00000151834	GABRA2			ENSG00000119922	IFIT2	immune-related gene
ENSG00000151883	PARP8			ENSG00000119938	PPP1R3C
ENSG00000151923	TIAL1			ENSG00000120029	C10orf76
ENSG00000151929	BAG3			ENSG00000120162	MOB3B
ENSG00000152092	ASTN1			ENSG00000120254	MTHFD1L
ENSG00000152270	PDE3B			ENSG00000120539	MASTL
ENSG00000152455	SUV39H2			ENSG00000120549	KIAA1217
ENSG00000152464	RPP38			ENSG00000120594	PLXDC2
ENSG00000152465	NMT2			ENSG00000120659	TNFSF11	immune-related gene
ENSG00000152558	TMEM123			ENSG00000120675	DNAJC15
ENSG00000152583	SPARCL1			ENSG00000120690	ELF1	immune-related gene
ENSG00000152766	ANKRD22			ENSG00000120697	ALG5
ENSG00000152910	CNTNAP4			ENSG00000120699	EXOSC8
ENSG00000152942	RAD17			ENSG00000120833	SOCS2	immune-related gene
ENSG00000153002	CPB1			ENSG00000120899	PTK2B	immune-related gene
ENSG00000153064	BANK1			ENSG00000120903	CHRNA2
ENSG00000153157	SYCP2L			ENSG00000120915	EPHX2
ENSG00000153201	RANBP2			ENSG00000120963	ZNF706
ENSG00000153827	TRIP12	immune-related gene		ENSG00000121039	RDH10
ENSG00000153832	FBXO36			ENSG00000121104	FAM117A
ENSG00000153936	HS2ST1			ENSG00000121274	PAPD5
ENSG00000154027	AK5			ENSG00000121297	TSHZ3
ENSG00000154127	UBASH3B			ENSG00000121481	RNF2
ENSG00000154262	ABCA6			ENSG00000121486	TRMT1L
ENSG00000154328	NEIL2			ENSG00000121577	POPDC2
ENSG00000154438	ASZ1			ENSG00000121807	CCR2	immune-related gene
ENSG00000154678	PDE1C	immune-related gene		ENSG00000121858	TNFSF10	immune-related gene
ENSG00000155256	ZFYVE27			ENSG00000121879	PIK3CA	immune-related gene
ENSG00000155465	SLC7A7			ENSG00000122008	POLK
ENSG00000155511	GRIA1			ENSG00000122068	FYTTD1
ENSG00000155561	NUP205			ENSG00000122507	BBS9
ENSG00000155719	OTOA			ENSG00000122515	ZMIZ2
ENSG00000156011	PSD3			ENSG00000122547	EEPD1
ENSG00000156110	ADK			ENSG00000122691	TWIST1
ENSG00000156170	NDUFAF6			ENSG00000122694	GLIPR2
ENSG00000156453	PCDH1			ENSG00000122707	RECK
ENSG00000156500	FAM122C			ENSG00000122778	KIAA1549
ENSG00000156504	FAM122B			ENSG00000122779	TRIM24	immune-related gene
ENSG00000156931	VPS8			ENSG00000122786	CALD1
ENSG00000156973	PDE6D			ENSG00000122870	BICC1
ENSG00000157601	MX1	immune-related gene		ENSG00000122877	EGR2
ENSG00000157851	DPYSL5			ENSG00000123080	CDKN2C
ENSG00000158019	BRE			ENSG00000123091	RNF11
ENSG00000158092	NCK1	immune-related gene		ENSG00000123124	WWP1	immune-related gene
ENSG00000158163	DZIP1L			ENSG00000123130	ACOT9
ENSG00000158292	GPR153			ENSG00000123213	NLN
ENSG00000158321	AUTS2			ENSG00000123297	TSFM
ENSG00000158411	MITD1			ENSG00000123338	NCKAP1L	immune-related gene
ENSG00000158417	EIF5B			ENSG00000123352	SPATS2
ENSG00000158467	AHCYL2			ENSG00000123427	METTL21B
ENSG00000158470	B4GALT5			ENSG00000123505	AMD1
ENSG00000159217	IGF2BP1			ENSG00000123552	USP45
ENSG00000159307	SCUBE1			ENSG00000123636	BAZ2B
ENSG00000159374	M1AP			ENSG00000123643	SLC36A1
ENSG00000159450	TCHH			ENSG00000123684	LPGAT1
ENSG00000159579	RSPRY1			ENSG00000123737	EXOSC9
ENSG00000159712	ANKRD18CP			ENSG00000123908	AGO2	immune-related gene
ENSG00000159788	RGS12			ENSG00000123983	ACSL3
ENSG00000159884	CCDC107			ENSG00000124126	PREX1
ENSG00000160049	DFFA			ENSG00000124151	NCOA3
ENSG00000160058	BSDC1			ENSG00000124214	STAU1
ENSG00000160216	AGPAT3			ENSG00000124228	DDX27
ENSG00000160856	FCRL3			ENSG00000124356	STAMBP
ENSG00000161013	MGAT4B			ENSG00000124380	SNRNP27
ENSG00000161021	MAML1			ENSG00000124496	TRERF1
ENSG00000161243	FBXO27	immune-related gene		ENSG00000124587	PEX6
ENSG00000161547	SRSF2			ENSG00000124731	TREM1	immune-related gene
ENSG00000161572	LYZL6			ENSG00000124749	COL21A1
ENSG00000161647	MPP3			ENSG00000124766	SOX4
ENSG00000161791	FMNL3			ENSG00000124782	RREB1
ENSG00000161939	RNASEK-C17orf49			ENSG00000124788	ATXN1
ENSG00000162039	MEIOB			ENSG00000124789	NUP153	immune-related gene
ENSG00000162129	CLPB			ENSG00000124813	RUNX2
ENSG00000162341	TPCN2			ENSG00000124818	OPN5
ENSG00000162398	C1orf177			ENSG00000125084	WNT1
ENSG00000162430	SEPN1			ENSG00000125148	MT2A
ENSG00000162433	AK4			ENSG00000125245	GPR18
ENSG00000162631	NTNG1			ENSG00000125355	TMEM255A
ENSG00000162641	AKNAD1			ENSG00000125384	PTGER2
ENSG00000162711	NLRP3	immune-related gene		ENSG00000125454	SLC25A19
ENSG00000162735	PEX19			ENSG00000125485	DDX31
ENSG00000162772	ATF3	immune-related gene		ENSG00000125492	BARHL1
ENSG00000162897	FCAMR			ENSG00000125686	MED1
ENSG00000163171	CDC42EP3			ENSG00000125772	GPCPD1
ENSG00000163191	S100A11			ENSG00000125812	GZF1
ENSG00000163288	GABRB1			ENSG00000125814	NAPB
ENSG00000163453	IGFBP7			ENSG00000125952	MAX
ENSG00000163485	ADORA1			ENSG00000125954	CHURC1-FNTB
ENSG00000163518	FCRL4			ENSG00000126003	PLAGL2
ENSG00000163635	ATXN7			ENSG00000126010	GRPR
ENSG00000163661	PTX3	immune-related gene		ENSG00000126067	PSMB2	immune-related gene
ENSG00000163673	DCLK3			ENSG00000126091	ST3GAL3
ENSG00000163697	APBB2			ENSG00000126353	CCR7	immune-related gene
ENSG00000163710	PCOLCE2			ENSG00000126453	BCL2L12
ENSG00000163719	MTMR14			ENSG00000126457	PRMT1	immune-related gene
ENSG00000163743	RCHY1	immune-related gene		ENSG00000126460	PRRG2
ENSG00000163755	HPS3			ENSG00000126464	PRR12
ENSG00000163781	TOPBP1			ENSG00000126581	BECN1	immune-related gene
ENSG00000163803	PLB1			ENSG00000126583	PRKCG	immune-related gene
ENSG00000163817	SLC6A20			ENSG00000126709	IFI6	immune-related gene
ENSG00000163864	NMNAT3			ENSG00000126749	EMG1
ENSG00000163882	POLR2H	immune-related gene		ENSG00000126775	ATG14
ENSG00000163946	FAM208A			ENSG00000127084	FGD3
ENSG00000163947	ARHGEF3			ENSG00000127124	HIVEP3
ENSG00000164039	BDH2			ENSG00000127314	RAP1B	immune-related gene
ENSG00000164086	DUSP7	immune-related gene		ENSG00000127324	TSPAN8
ENSG00000164087	POC1A			ENSG00000127419	TMEM175
ENSG00000164100	NDST3			ENSG00000127481	UBR4	immune-related gene
ENSG00000164151	KIAA0947			ENSG00000127526	SLC35E1
ENSG00000164163	ABCE1			ENSG00000127527	EPS15L1
ENSG00000164164	OTUD4			ENSG00000127528	KLF2
ENSG00000164180	TMEM161B			ENSG00000127603	MACF1
ENSG00000164199	GPR98			ENSG00000127663	KDM4B
ENSG00000164237	CMBL			ENSG00000127947	PTPN12
ENSG00000164305	CASP3			ENSG00000128284	APOL3
ENSG00000164308	ERAP2	immune-related gene		ENSG00000128512	DOCK4
ENSG00000164442	CITED2			ENSG00000128573	FOXP2
ENSG00000164506	STXBP5			ENSG00000128585	MKLN1
ENSG00000164611	PTTG1			ENSG00000128607	KLHDC10
ENSG00000164626	KCNK5			ENSG00000128609	NDUFA5
ENSG00000164691	TAGAP			ENSG00000128805	ARHGAP22
ENSG00000164756	SLC30A8			ENSG00000128915	NARG2
ENSG00000164841	TMEM74			ENSG00000128918	ALDH1A2
ENSG00000164902	PHAX			ENSG00000129084	PSMA1	immune-related gene
ENSG00000164904	ALDH7A1			ENSG00000129116	PALLD
ENSG00000164961	KIAA0196			ENSG00000129474	AJUBA
ENSG00000164985	PSIP1			ENSG00000129493	HEATR5A
ENSG00000164989	CCDC171			ENSG00000129515	SNX6
ENSG00000165115	KIF27			ENSG00000129562	DAD1
ENSG00000165138	ANKS6			ENSG00000129595	EPB41L4A
ENSG00000165338	HECTD2	immune-related gene		ENSG00000129673	AANAT
ENSG00000165392	WRN			ENSG00000130024	PHF10
ENSG00000165548	TMEM63C			ENSG00000130066	SAT1
ENSG00000165629	ATP5C1			ENSG00000130167	TSPAN16
ENSG00000165682	CLEC1B	immune-related gene		ENSG00000130309	COLGALT1
ENSG00000165688	PMPCA			ENSG00000130313	PGLS
ENSG00000165886	UBTD1			ENSG00000130377	ACSBG2
ENSG00000165887	ANKRD2			ENSG00000130382	MLLT1
ENSG00000166004	KIAA1731			ENSG00000130449	ZSWIM6
ENSG00000166012	TAF1D			ENSG00000130475	FCHO1
ENSG00000166035	LIPC			ENSG00000130511	SSBP4
ENSG00000166073	GPR176			ENSG00000130517	PGPEP1
ENSG00000166272	WBP1L			ENSG00000130520	LSM4
ENSG00000166278	C2	immune-related gene		ENSG00000130559	CAMSAP1
ENSG00000166402	TUB			ENSG00000130560	UBAC1	immune-related gene
ENSG00000166532	RIMKLB			ENSG00000130638	ATXN10
ENSG00000166535	A2ML1			ENSG00000130669	PAK4
ENSG00000166598	HSP90B1	immune-related gene		ENSG00000130695	CEP85
ENSG00000166748	AGBL1			ENSG00000130703	OSBPL2
ENSG00000166780	C16orf45			ENSG00000130723	PRRC2B
ENSG00000166855	CLPX			ENSG00000130956	HABP4
ENSG00000166862	CACNG2			ENSG00000130958	SLC35D2
ENSG00000166960	CCDC178			ENSG00000131089	ARHGEF9
ENSG00000167355	AC104389.28			ENSG00000131115	ZNF227
ENSG00000167528	ZNF641			ENSG00000131236	CAP1
ENSG00000167693	NXN	immune-related gene		ENSG00000131238	PPT1
ENSG00000167740	CYB5D2			ENSG00000131355	EMR3
ENSG00000167861	HID1			ENSG00000131370	SH3BP5
ENSG00000167862	ICT1			ENSG00000131373	HACL1
ENSG00000168016	TRANK1			ENSG00000131375	CAPN7
ENSG00000168026	TTC21A			ENSG00000131462	TUBG1
ENSG00000168137	SETD5			ENSG00000131475	VPS25
ENSG00000168243	GNG4			ENSG00000131504	DIAPH1
ENSG00000168259	DNAJC7			ENSG00000131778	CHD1L
ENSG00000168314	MOBP			ENSG00000131797	CLUHP3
ENSG00000168334	XIRP1			ENSG00000131873	CHSY1
ENSG00000168461	RAB31			ENSG00000131966	ACTR10
ENSG00000168566	SNRNP48			ENSG00000131979	GCH1
ENSG00000168675	LDLRAD4			ENSG00000132199	ENOSF1
ENSG00000168918	INPP5D	immune-related gene		ENSG00000132205	EMILIN2
ENSG00000168994	PXDC1			ENSG00000132256	TRIM5	immune-related gene
ENSG00000169045	HNRNPH1			ENSG00000132359	RAP1GAP2	immune-related gene
ENSG00000169071	ROR2			ENSG00000132376	INPP5K
ENSG00000169136	ATF5			ENSG00000132388	UBE2G1	immune-related gene
ENSG00000169189	NSMCE1			ENSG00000132405	TBC1D14
ENSG00000169251	NMD3			ENSG00000132434	LANCL2
ENSG00000169499	PLEKHA2			ENSG00000132463	GRSF1
ENSG00000169621	APLF			ENSG00000132464	ENAM
ENSG00000169696	ASPSCR1			ENSG00000132467	UTP3
ENSG00000169756	LIMS1			ENSG00000132604	TERF2
ENSG00000169758	C15orf27			ENSG00000132824	SERINC3
ENSG00000169855	ROBO1			ENSG00000132854	KANK4
ENSG00000169946	ZFPM2	immune-related gene		ENSG00000132912	DCTN4	immune-related gene
ENSG00000170291	ELP5			ENSG00000132965	ALOX5AP
ENSG00000170322	NFRKB			ENSG00000132972	RNF17
ENSG00000170423	KRT78			ENSG00000133104	SPG20
ENSG00000170502	NUDT9			ENSG00000133106	EPSTI1
ENSG00000170579	DLGAP1			ENSG00000133318	RTN3
ENSG00000170653	ATF7			ENSG00000133393	FOPNL
ENSG00000170689	HOXB9			ENSG00000133424	LARGE
ENSG00000170871	KIAA0232			ENSG00000133687	TMTC1
ENSG00000170927	PKHD1			ENSG00000133805	AMPD3
ENSG00000170989	S1PR1			ENSG00000133818	RRAS2
ENSG00000171097	CCBL1			ENSG00000133858	ZFC3H1
ENSG00000171174	RBKS			ENSG00000134030	CTIF
ENSG00000171310	CHST11			ENSG00000134046	MBD2
ENSG00000171408	PDE7B			ENSG00000134049	IER3IP1
ENSG00000171428	NAT1			ENSG00000134077	THUMPD3
ENSG00000171435	KSR2			ENSG00000134186	PRPF38B
ENSG00000171453	POLR1C	immune-related gene		ENSG00000134215	VAV3	immune-related gene
ENSG00000171469	ZNF561			ENSG00000134247	PTGFRN
ENSG00000171490	RSL1D1			ENSG00000134262	AP4B1
ENSG00000171497	PPID			ENSG00000134287	ARF3
ENSG00000171522	PTGER4	immune-related gene		ENSG00000134324	LPIN1
ENSG00000171574	ZNF584			ENSG00000134363	FST
ENSG00000171617	ENC1			ENSG00000134490	TMEM241
ENSG00000171631	P2RY6			ENSG00000134504	KCTD1
ENSG00000171823	FBXL14	immune-related gene		ENSG00000134602	MST4
ENSG00000171824	EXOSC10			ENSG00000134769	DTNA
ENSG00000172197	MBOAT1			ENSG00000134775	FHOD3
ENSG00000172348	RCAN2			ENSG00000134851	TMEM165
ENSG00000172380	GNG12			ENSG00000134852	CLOCK
ENSG00000172456	FGGY			ENSG00000134871	COL4A2
ENSG00000172590	MRPL52			ENSG00000134882	UBAC2
ENSG00000172653	C17orf66			ENSG00000134954	ETS1	immune-related gene
ENSG00000172660	TAF15			ENSG00000135090	TAOK3
ENSG00000172775	FAM192A			ENSG00000135114	OASL
ENSG00000172840	PDP2			ENSG00000135124	P2RX4
ENSG00000172878	METAP1D			ENSG00000135148	TRAFD1	immune-related gene
ENSG00000173093	CCDC63			ENSG00000135211	TMEM60
ENSG00000173145	NOC3L			ENSG00000135272	MDFIC
ENSG00000173535	TNFRSF10C			ENSG00000135297	MTO1
ENSG00000173611	SCAI			ENSG00000135318	NT5E
ENSG00000173762	CD7			ENSG00000135341	MAP3K7	immune-related gene
ENSG00000173786	CNP			ENSG00000135372	NAT10
ENSG00000173821	RNF213	immune-related gene		ENSG00000135387	CAPRIN1	immune-related gene
ENSG00000174109	C16orf91			ENSG00000135407	AVIL
ENSG00000174527	MYO1H			ENSG00000135535	CD164
ENSG00000174564	IL20RB			ENSG00000135541	AHI1
ENSG00000174780	SRP72			ENSG00000135740	SLC9A5
ENSG00000174792	C4orf26			ENSG00000135747	ZNF670
ENSG00000174796	THAP6			ENSG00000135766	EGLN1
ENSG00000174840	PDE12	immune-related gene		ENSG00000135837	CEP350
ENSG00000174844	DNAH12			ENSG00000135838	NPL
ENSG00000174944	P2RY14	immune-related gene		ENSG00000135842	FAM129A
ENSG00000175003	SLC22A1			ENSG00000135845	PIGC
ENSG00000175279	APITD1			ENSG00000135862	LAMC1
ENSG00000175390	EIF3F			ENSG00000135870	RC3H1
ENSG00000175471	MCTP1			ENSG00000135898	GPR55
ENSG00000175806	MSRA			ENSG00000135899	SP110
ENSG00000175826	CTDNEP1			ENSG00000135900	MRPL44
ENSG00000176058	TPRN			ENSG00000135905	DOCK10
ENSG00000176095	IP6K1	immune-related gene		ENSG00000135919	SERPINE2
ENSG00000176105	YES1	immune-related gene		ENSG00000135931	ARMC9
ENSG00000176236	C10orf111			ENSG00000135932	CAB39
ENSG00000176244	ACBD7			ENSG00000136051	KIAA1033
ENSG00000176473	WDR25			ENSG00000136111	TBC1D4
ENSG00000176597	B3GNT5			ENSG00000136147	PHF11
ENSG00000176912	C18orf56			ENSG00000136153	LMO7	immune-related gene
ENSG00000176915	ANKLE2			ENSG00000136156	ITM2B
ENSG00000176994	SMCR8			ENSG00000136158	SPRY2
ENSG00000177034	MTX3			ENSG00000136169	SETDB2
ENSG00000177200	CHD9			ENSG00000136205	TNS3
ENSG00000177302	TOP3A			ENSG00000136238	RAC1	immune-related gene
ENSG00000177427	MIEF2			ENSG00000136244	IL6	immune-related gene
ENSG00000177570	SAMD12			ENSG00000136305	CIDEB
ENSG00000177731	FLII			ENSG00000136379	ABHD17C
ENSG00000178226	PRSS36			ENSG00000136383	ALPK3
ENSG00000178297	TMPRSS9			ENSG00000136504	KAT7
ENSG00000178538	CA8			ENSG00000136560	TANK	immune-related gene
ENSG00000178573	MAF			ENSG00000136631	VPS45	immune-related gene
ENSG00000178764	ZHX2			ENSG00000136643	RPS6KC1
ENSG00000178803	ADORA2A-AS1			ENSG00000136689	IL1RN
ENSG00000179364	PACS2			ENSG00000136758	YME1L1
ENSG00000179562	GCC1			ENSG00000136807	CDK9	immune-related gene
ENSG00000179588	ZFPM1	immune-related gene		ENSG00000136811	ODF2
ENSG00000179761	PIPOX			ENSG00000136867	SLC31A2
ENSG00000179772	FOXS1			ENSG00000136868	SLC31A1
ENSG00000179913	B3GNT3			ENSG00000136891	TEX10
ENSG00000179918	SEPHS2			ENSG00000136929	HEMGN
ENSG00000180044	C3orf80			ENSG00000136932	C9orf156
ENSG00000180104	EXOC3			ENSG00000136938	ANP32B
ENSG00000180182	MED14			ENSG00000136960	ENPP2
ENSG00000180376	CCDC66			ENSG00000137142	IGFBPL1
ENSG00000180481	GLIPR1L2			ENSG00000137161	CNPY3	immune-related gene
ENSG00000180611	MB21D2			ENSG00000137177	KIF13A
ENSG00000180628	PCGF5			ENSG00000137225	CAPN11
ENSG00000180758	GPR157			ENSG00000137449	CPEB2
ENSG00000181035	SLC25A42			ENSG00000137497	NUMA1
ENSG00000181038	METTL23			ENSG00000137507	LRRC32
ENSG00000181135	ZNF707			ENSG00000137522	RNF121
ENSG00000181381	DDX60L			ENSG00000137558	PI15
ENSG00000181690	PLAG1			ENSG00000137575	SDCBP
ENSG00000182185	RAD51B			ENSG00000137628	DDX60	immune-related gene
ENSG00000182197	EXT1			ENSG00000137674	MMP20
ENSG00000182220	ATP6AP2			ENSG00000137714	FDX1
ENSG00000182240	BACE2			ENSG00000137752	CASP1	immune-related gene
ENSG00000182557	SPNS3			ENSG00000137760	ALKBH8
ENSG00000182621	PLCB1			ENSG00000137802	MAPKBP1
ENSG00000182667	NTM			ENSG00000137804	NUSAP1
ENSG00000182718	ANXA2	immune-related gene		ENSG00000137857	DUOX1	immune-related gene
ENSG00000182871	COL18A1			ENSG00000137860	SLC28A2
ENSG00000182903	ZNF721			ENSG00000137869	CYP19A1
ENSG00000182919	C11orf54			ENSG00000137959	IFI44L
ENSG00000183010	PYCR1			ENSG00000138018	EPT1
ENSG00000183023	SLC8A1			ENSG00000138032	PPM1B
ENSG00000183117	CSMD1			ENSG00000138061	CYP1B1
ENSG00000183258	DDX41	immune-related gene		ENSG00000138078	PREPL
ENSG00000183309	ZNF623			ENSG00000138119	MYOF
ENSG00000183346	C10orf107			ENSG00000138138	ATAD1
ENSG00000183378	OVCH2			ENSG00000138166	DUSP5
ENSG00000183535	COL18A1-AS1			ENSG00000138185	ENTPD1
ENSG00000183625	CCR3	immune-related gene		ENSG00000138190	EXOC6
ENSG00000183775	KCTD16			ENSG00000138311	ZNF365
ENSG00000183914	DNAH2			ENSG00000138395	CDK15
ENSG00000184012	TMPRSS2			ENSG00000138399	FASTKD1
ENSG00000184293	CLECL1			ENSG00000138430	OLA1
ENSG00000184313	MROH7			ENSG00000138442	WDR12
ENSG00000184574	LPAR5			ENSG00000138468	SENP7
ENSG00000184608	C8orf12			ENSG00000138496	PARP9
ENSG00000184640	SEPT9			ENSG00000138604	GLCE
ENSG00000184719	RNLS			ENSG00000138606	SHF
ENSG00000184990	SIVA1	immune-related gene		ENSG00000138613	APH1B
ENSG00000185009	AP3M1			ENSG00000138629	UBL7
ENSG00000185033	SEMA4B			ENSG00000138642	HERC6	immune-related gene
ENSG00000185105	MYADML2			ENSG00000138646	HERC5	immune-related gene
ENSG00000185246	PRPF39			ENSG00000138650	PCDH10
ENSG00000185261	KIAA0825			ENSG00000138670	RASGEF1B	immune-related gene
ENSG00000185414	MRPL30			ENSG00000138685	FGF2	immune-related gene
ENSG00000185442	FAM174B			ENSG00000138835	RGS3
ENSG00000185518	SV2B			ENSG00000139083	ETV6
ENSG00000185658	BRWD1			ENSG00000139154	AEBP2
ENSG00000185722	ANKFY1			ENSG00000139163	ETNK1
ENSG00000185739	SRL			ENSG00000139174	PRICKLE1
ENSG00000185753	CXorf38			ENSG00000139278	GLIPR1
ENSG00000185774	KCNIP4	immune-related gene		ENSG00000139304	PTPRQ
ENSG00000185875	THNSL1			ENSG00000139318	DUSP6	immune-related gene
ENSG00000185947	ZNF267			ENSG00000139610	CELA1
ENSG00000185989	RASA3			ENSG00000139668	WDFY2
ENSG00000186001	LRCH3			ENSG00000139684	ESD
ENSG00000186088	GSAP			ENSG00000139687	RB1	immune-related gene
ENSG00000186094	AGBL4			ENSG00000139722	VPS37B
ENSG00000186153	WWOX			ENSG00000139746	RBM26
ENSG00000186187	ZNRF1	immune-related gene		ENSG00000139793	MBNL2
ENSG00000186191	BPIFB4			ENSG00000139826	ABHD13
ENSG00000186314	PRELID2			ENSG00000139832	RAB20
ENSG00000186350	RXRA	immune-related gene		ENSG00000139865	TTC6	immune-related gene
ENSG00000186417	GLDN			ENSG00000139908	TSSK4
ENSG00000186432	KPNA4			ENSG00000139971	C14orf37
ENSG00000186442	KRT3			ENSG00000140320	BAHD1
ENSG00000186628	FSD2			ENSG00000140379	BCL2A1	immune-related gene
ENSG00000186716	BCR			ENSG00000140382	HMG20A
ENSG00000186806	VSIG10L			ENSG00000140391	TSPAN3
ENSG00000187164	KIAA1598			ENSG00000140396	NCOA2
ENSG00000187323	DCC			ENSG00000140443	IGF1R	immune-related gene
ENSG00000187498	COL4A1			ENSG00000140526	ABHD2
ENSG00000187522	HSPA14	immune-related gene		ENSG00000140545	MFGE8
ENSG00000187554	TLR5	immune-related gene		ENSG00000140563	MCTP2
ENSG00000187555	USP7	immune-related gene		ENSG00000140564	FURIN
ENSG00000187713	TMEM203			ENSG00000140632	GLYR1
ENSG00000187957	DNER			ENSG00000140807	NKD1
ENSG00000188001	TPRG1			ENSG00000140836	ZFHX3
ENSG00000188039	NWD1			ENSG00000140853	NLRC5	immune-related gene
ENSG00000188158	NHS			ENSG00000140968	IRF8	immune-related gene
ENSG00000188452	CERKL			ENSG00000141252	VPS53
ENSG00000188493	C19orf54			ENSG00000141380	SS18
ENSG00000188760	TMEM198			ENSG00000141447	OSBPL1A	immune-related gene
ENSG00000188801	ZNF322P1			ENSG00000141552	ANAPC11	immune-related gene
ENSG00000196139	AKR1C3			ENSG00000141564	RPTOR
ENSG00000196150	ZNF250			ENSG00000141627	DYM
ENSG00000196290	NIF3L1			ENSG00000141682	PMAIP1	immune-related gene
ENSG00000196305	IARS			ENSG00000141699	FAM134C
ENSG00000196353	CPNE4			ENSG00000141753	IGFBP4
ENSG00000196366	C9orf163			ENSG00000141979	CTD-3222D19.2
ENSG00000196367	TRRAP			ENSG00000142178	SIK1
ENSG00000196418	ZNF124			ENSG00000142230	SAE1
ENSG00000196482	ESRRG			ENSG00000142546	NOSIP
ENSG00000196504	PRPF40A			ENSG00000142621	FHAD1
ENSG00000196565	HBG2			ENSG00000142684	ZNF593
ENSG00000196591	HDAC2	immune-related gene		ENSG00000143028	SYPL2
ENSG00000196597	ZNF782			ENSG00000143033	MTF2
ENSG00000196639	HRH1			ENSG00000143079	CTTNBP2NL
ENSG00000196660	SLC30A10			ENSG00000143106	PSMA5	immune-related gene
ENSG00000196700	ZNF512B			ENSG00000143107	FNDC7
ENSG00000196730	DAPK1			ENSG00000143156	NME7
ENSG00000197006	METTL9			ENSG00000143162	CREG1
ENSG00000197102	DYNC1H1	immune-related gene		ENSG00000143164	DCAF6
ENSG00000197119	SLC25A29			ENSG00000143179	UCK2
ENSG00000197241	SLC2A7			ENSG00000143337	TOR1AIP1
ENSG00000197302	ZNF720			ENSG00000143341	HMCN1
ENSG00000197405	C5AR1	immune-related gene		ENSG00000143344	RGL1
ENSG00000197415	VEPH1			ENSG00000143353	LYPLAL1
ENSG00000197472	ZNF695			ENSG00000143387	CTSK	immune-related gene
ENSG00000197548	ATG7	immune-related gene		ENSG00000143437	ARNT
ENSG00000197566	ZNF624			ENSG00000143494	VASH2
ENSG00000197694	SPTAN1			ENSG00000143507	DUSP10	immune-related gene
ENSG00000198000	NOL8			ENSG00000143514	TP53BP2
ENSG00000198040	ZNF84			ENSG00000143614	GATAD2B
ENSG00000198089	SFI1			ENSG00000143641	GALNT2
ENSG00000198121	LPAR1			ENSG00000143643	TTC13
ENSG00000198301	SDAD1			ENSG00000143653	SCCPDH
ENSG00000198431	TXNRD1			ENSG00000143674	MLK4
ENSG00000198467	TPM2			ENSG00000143751	SDE2
ENSG00000198563	DDX39B			ENSG00000143756	FBXO28
ENSG00000198670	LPA			ENSG00000143761	ARF1	immune-related gene
ENSG00000198722	UNC13B			ENSG00000143774	GUK1
ENSG00000198730	CTR9			ENSG00000143801	PSEN2
ENSG00000198734	F5			ENSG00000143889	HNRNPLL
ENSG00000198736	MSRB1	immune-related gene		ENSG00000143891	GALM
ENSG00000198793	MTOR	immune-related gene		ENSG00000144357	UBR3
ENSG00000198797	BRINP2			ENSG00000144381	HSPD1	immune-related gene
ENSG00000198799	LRIG2			ENSG00000144426	NBEAL1
ENSG00000198814	GK			ENSG00000144455	SUMF1
ENSG00000198833	UBE2J1	immune-related gene		ENSG00000144619	CNTN4
ENSG00000198839	ZNF277			ENSG00000144648	ACKR2	immune-related gene
ENSG00000198842	DUSP27			ENSG00000144655	CSRNP1
ENSG00000198954	KIAA1279			ENSG00000144724	PTPRG
ENSG00000199368	RNU6-1084P			ENSG00000144736	SHQ1
ENSG00000199529	RNU6-462P			ENSG00000144840	RABL3
ENSG00000199716	Y_RNA			ENSG00000144843	ADPRH
ENSG00000199846	RNU1-72P			ENSG00000144868	TMEM108
ENSG00000200347	RNU6-963P			ENSG00000145012	LPP	immune-related gene
ENSG00000200755	RNA5SP68			ENSG00000145016	KIAA0226	immune-related gene
ENSG00000201179	RNU6-1322P			ENSG00000145191	EIF2B5
ENSG00000201548	Y_RNA			ENSG00000145194	ECE2
ENSG00000202386	RNA5SP211			ENSG00000145198	VWA5B2
ENSG00000203279	RP11-498P14.5			ENSG00000145214	DGKQ
ENSG00000203602	AL137059.1			ENSG00000145217	SLC26A1
ENSG00000203724	C1orf53			ENSG00000145354	CISD2
ENSG00000203780	FANK1			ENSG00000145388	METTL14
ENSG00000203799	CCDC162P			ENSG00000145390	USP53
ENSG00000203867	RBM20			ENSG00000145416	2020-03-01
ENSG00000204022	LIPJ			ENSG00000145545	SRD5A1
ENSG00000204161	C10orf128			ENSG00000145555	MYO10	immune-related gene
ENSG00000204310	AGPAT1			ENSG00000145604	SKP2	immune-related gene
ENSG00000204315	FKBPL			ENSG00000145685	LHFPL2
ENSG00000204356	NELFE			ENSG00000145725	PPIP5K2
ENSG00000204366	ZBTB12			ENSG00000145779	TNFAIP8
ENSG00000204371	EHMT2	immune-related gene		ENSG00000145819	ARHGAP26
ENSG00000204469	PRRC2A			ENSG00000145833	DDX46
ENSG00000204472	AIF1			ENSG00000145863	GABRA6
ENSG00000204498	NFKBIL1			ENSG00000145864	GABRB2
ENSG00000204673	AKT1S1	immune-related gene		ENSG00000145920	CPLX2
ENSG00000204754	CTC-281M20.1			ENSG00000145934	TENM2
ENSG00000204876	AC021218.2			ENSG00000146147	MLIP
ENSG00000204929	AC074391.1			ENSG00000146247	PHIP
ENSG00000204930	FAM221B			ENSG00000146278	PNRC1
ENSG00000204954	C12orf73			ENSG00000146374	RSPO3
ENSG00000205189	ZBTB10			ENSG00000146376	ARHGAP18
ENSG00000206199	ANKUB1			ENSG00000146426	TIAM2
ENSG00000206531	CD200R1L			ENSG00000146457	WTAP
ENSG00000206815	RNU6-483P			ENSG00000146535	GNA12
ENSG00000206979	SNORD61			ENSG00000146678	IGFBP1
ENSG00000206990	Y_RNA			ENSG00000146809	ASB15	immune-related gene
ENSG00000207129	RNA5SP187			ENSG00000146830	GIGYF1
ENSG00000207185	RNU6-1157P			ENSG00000147010	SH3KBP1	immune-related gene
ENSG00000207390	Y_RNA			ENSG00000147119	CHST7
ENSG00000207395	Y_RNA			ENSG00000147140	NONO
ENSG00000207401	Y_RNA			ENSG00000147166	ITGB1BP2
ENSG00000207462	RNU6-376P			ENSG00000147206	NXF3
ENSG00000207556	MIR636			ENSG00000147251	DOCK11
ENSG00000207705	MIR129-1			ENSG00000147257	GPC3
ENSG00000208035	MIR143			ENSG00000147316	MCPH1
ENSG00000210741	MIR196A1			ENSG00000147324	MFHAS1
ENSG00000211813	TRAV34			ENSG00000147454	SLC25A37
ENSG00000211814	TRAV35			ENSG00000147459	DOCK5
ENSG00000211815	TRAV36DV7			ENSG00000147481	SNTG1
ENSG00000211996	Z97352.1			ENSG00000147488	ST18
ENSG00000213023	SYT3			ENSG00000147509	RGS20
ENSG00000213024	NUP62			ENSG00000147526	TACC1
ENSG00000213111	COX5BP2			ENSG00000147576	ADHFE1
ENSG00000213316	LTC4S			ENSG00000147592	LACTB2
ENSG00000213676	ATF6B			ENSG00000147894	C9orf72
ENSG00000213760	ATP6V1G2			ENSG00000147896	IFNK	immune-related gene
ENSG00000213790	OLA1P1			ENSG00000147905	ZCCHC7
ENSG00000213931	HBE1			ENSG00000147912	FBXO10	immune-related gene
ENSG00000213963	AC074286.1			ENSG00000148090	AUH
ENSG00000213964	CHCHD4P4			ENSG00000148123	LPPR1
ENSG00000214093	RP11-247I13.3			ENSG00000148200	NR6A1
ENSG00000214198	RP11-642P15.1			ENSG00000148219	ASTN2
ENSG00000214216	IQCJ			ENSG00000148248	SURF4
ENSG00000214278	CTD-2228K2.2			ENSG00000148291	SURF2
ENSG00000214871	AC005082.1			ENSG00000148300	REXO4
ENSG00000215067	AC027763.2			ENSG00000148308	GTF3C5
ENSG00000215267	AKR1C7P			ENSG00000148339	SLC25A25
ENSG00000215458	AP001053.11			ENSG00000148358	GPR107
ENSG00000215838	RP11-466F5.6			ENSG00000148377	IDI2
ENSG00000218510	LINC00339			ENSG00000148481	FAM188A
ENSG00000219200	RNASEK			ENSG00000148634	HERC4	immune-related gene
ENSG00000219410	RP4-761J14.8			ENSG00000148690	FRA10AC1
ENSG00000221403	AC096633.1			ENSG00000148737	TCF7L2
ENSG00000221523	AC079080.1			ENSG00000148842	CNNM2
ENSG00000221633	U3			ENSG00000149084	HSD17B12
ENSG00000221639	SNORA3			ENSG00000149177	PTPRJ	immune-related gene
ENSG00000221990	C5orf55			ENSG00000149212	SESN3
ENSG00000222042	AP000233.4			ENSG00000149289	ZC3H12C
ENSG00000222266	RNU6-757P			ENSG00000149294	NCAM1
ENSG00000222297	RNU6-1156P			ENSG00000149781	FERMT3
ENSG00000222421	Y_RNA			ENSG00000149930	TAOK2
ENSG00000224063	AC007319.1			ENSG00000149932	TMEM219
ENSG00000224116	INHBA-AS1			ENSG00000150051	MKX
ENSG00000224184	AC096559.1			ENSG00000150093	ITGB1	immune-related gene
ENSG00000224273	AC005077.7			ENSG00000150316	CWC15
ENSG00000224342	AC007879.1			ENSG00000150347	ARID5B
ENSG00000224358	RP11-466F5.8			ENSG00000150401	DCUN1D2
ENSG00000224418	STK24-AS1			ENSG00000150403	TMCO3
ENSG00000224609	RP11-470E16.1			ENSG00000150526	MIA2
ENSG00000224795	AP003039.3			ENSG00000150938	CRIM1
ENSG00000224812	TMEM72-AS1			ENSG00000150961	SEC24D	immune-related gene
ENSG00000225135	RP11-361F15.2			ENSG00000150967	ABCB9
ENSG00000225231	AC091814.2			ENSG00000151006	PRSS53
ENSG00000225329	RP11-325F22.5			ENSG00000151012	SLC7A11
ENSG00000225331	AP001055.6			ENSG00000151090	THRB	immune-related gene
ENSG00000225400	RP11-1114A5.5			ENSG00000151116	UEVLD
ENSG00000225938	RP4-575N6.4			ENSG00000151136	BTBD11
ENSG00000226174	TEX22			ENSG00000151150	ANK3
ENSG00000226239	RP1-310O13.7			ENSG00000151376	ME3
ENSG00000226301	PDCL3P1			ENSG00000151468	CCDC3
ENSG00000226309	SMARCE1P2			ENSG00000151491	EPS8	immune-related gene
ENSG00000226320	AC018359.1			ENSG00000151693	ASAP2
ENSG00000226367	ST7-AS2			ENSG00000151718	WWC2
ENSG00000226380	MIR29A	immune-related gene		ENSG00000151726	ACSL1
ENSG00000226397	C12orf77			ENSG00000151748	SAV1
ENSG00000226450	CYP2D8P			ENSG00000151789	ZNF385D
ENSG00000226576	RP11-523O18.1			ENSG00000151790	TDO2
ENSG00000226851	AC004112.4			ENSG00000152061	RABGAP1L
ENSG00000226877	RP11-575L7.2			ENSG00000152217	SETBP1
ENSG00000226983	AP000235.2			ENSG00000152229	PSTPIP2
ENSG00000227014	AC007285.6			ENSG00000152270	PDE3B
ENSG00000227028	SLC8A1-AS1			ENSG00000152348	ATG10
ENSG00000227136	LINC00595			ENSG00000152359	POC5
ENSG00000227217	RP11-367J7.3			ENSG00000152380	FAM151B
ENSG00000227355	RP11-162D16.2			ENSG00000152413	HOMER1
ENSG00000227610	FRMPD3-AS1			ENSG00000152475	ZNF837
ENSG00000227671	MIR3916			ENSG00000152492	CCDC50
ENSG00000227803	RP11-239H6.2			ENSG00000152558	TMEM123
ENSG00000228000	RPL7AP65			ENSG00000152582	SPEF2
ENSG00000228067	RP11-61J19.3			ENSG00000152601	MBNL1
ENSG00000228223	HCG11			ENSG00000152611	CAPSL
ENSG00000228312	GAPDHP45			ENSG00000152822	GRM1
ENSG00000228355	BX322559.3			ENSG00000153029	MR1	immune-related gene
ENSG00000228395	RP11-216B9.6			ENSG00000153064	BANK1
ENSG00000228397	RP1-224A6.3			ENSG00000153066	TXNDC11
ENSG00000228487	RP13-225O21.2			ENSG00000153071	DAB2
ENSG00000228624	RP3-399L15.3			ENSG00000153187	HNRNPU
ENSG00000228651	RP11-556E13.1			ENSG00000153233	PTPRR
ENSG00000228783	RP11-147I11.1			ENSG00000153292	GPR110
ENSG00000228829	AC005077.5			ENSG00000153317	ASAP1
ENSG00000228930	MTCO1P3			ENSG00000153443	UBALD1
ENSG00000229021	NBPF18P			ENSG00000153707	PTPRD
ENSG00000229191	RP11-168O16.1			ENSG00000153767	GTF2E1
ENSG00000229213	RP1-118J21.24			ENSG00000153774	CFDP1
ENSG00000229220	RP11-47A17.2			ENSG00000153814	JAZF1
ENSG00000229512	AC068580.5			ENSG00000153898	MCOLN2
ENSG00000229543	RP11-90J7.2			ENSG00000153976	HS3ST3A1
ENSG00000229557	LINC00379			ENSG00000154122	ANKH
ENSG00000229611	RP11-390F4.10			ENSG00000154127	UBASH3B
ENSG00000230064	RP11-244N20.7			ENSG00000154229	PRKCA	immune-related gene
ENSG00000230314	ELOVL2-AS1			ENSG00000154240	CEP112
ENSG00000230325	RP11-385F5.4			ENSG00000154258	ABCA9
ENSG00000230337	RP4-635E18.6			ENSG00000154309	DISP1
ENSG00000230417	LINC00856			ENSG00000154310	TNIK
ENSG00000230484	OR51A10P			ENSG00000154328	NEIL2
ENSG00000230633	RP11-37E23.5			ENSG00000154370	TRIM11	immune-related gene
ENSG00000230658	KLHL7-AS1			ENSG00000154429	CCSAP
ENSG00000230989	HSBP1			ENSG00000154447	SH3RF1	immune-related gene
ENSG00000231027	AC079325.6			ENSG00000154451	GBP5
ENSG00000231105	RP5-1071N3.1			ENSG00000154678	PDE1C	immune-related gene
ENSG00000231424	RP1-45C12.1			ENSG00000154721	JAM2
ENSG00000231616	RP11-575L7.4			ENSG00000154760	SLFN13
ENSG00000231721	LINC-PINT			ENSG00000154783	FGD5
ENSG00000231776	RP1-90L14.1			ENSG00000154975	CA10
ENSG00000231871	IPO9-AS1			ENSG00000155093	PTPRN2
ENSG00000232648	RP11-367N14.2			ENSG00000155096	AZIN1
ENSG00000232656	IDI2-AS1			ENSG00000155111	CDK19
ENSG00000232973	CYP1B1-AS1			ENSG00000155189	AGPAT5
ENSG00000233041	PHGR1			ENSG00000155307	SAMSN1
ENSG00000233360	Z83844.1			ENSG00000155329	ZCCHC10
ENSG00000233409	FANK1-AS1			ENSG00000155363	MOV10	immune-related gene
ENSG00000233441	CYP2AB1P			ENSG00000155366	RHOC
ENSG00000233559	AC016831.7			ENSG00000155367	PPM1J
ENSG00000233665	RP11-523O18.5			ENSG00000155393	HEATR3
ENSG00000233670	PIRT			ENSG00000155465	SLC7A7
ENSG00000233719	GOT2P3			ENSG00000155761	SPAG17
ENSG00000233895	RP1-122P22.2			ENSG00000155846	PPARGC1B	immune-related gene
ENSG00000233896	RP4-684O24.5			ENSG00000155849	ELMO1	immune-related gene
ENSG00000233901	RP11-65J3.1			ENSG00000155926	SLA
ENSG00000233912	AC026202.3			ENSG00000156011	PSD3
ENSG00000233933	RP11-63P12.2			ENSG00000156103	MMP16
ENSG00000234006	DDX39B-AS1			ENSG00000156110	ADK
ENSG00000234062	RP11-308D16.4			ENSG00000156113	KCNMA1
ENSG00000234208	CTA-256D12.11			ENSG00000156170	NDUFAF6
ENSG00000234309	SLC25A18P1			ENSG00000156219	ART3
ENSG00000234425	RP11-528G1.2			ENSG00000156232	WHAMM
ENSG00000234572	AC007880.1			ENSG00000156265	MAP3K7CL
ENSG00000234688	RP1-293L6.1			ENSG00000156273	BACH1
ENSG00000234902	AC007879.2			ENSG00000156463	SH3RF2
ENSG00000235027	AC068580.6			ENSG00000156509	FBXO43
ENSG00000235034	C19orf81			ENSG00000156639	ZFAND3
ENSG00000235131	RP5-1092A11.2			ENSG00000156787	TBC1D31
ENSG00000235296	AC137723.5			ENSG00000156795	WDYHV1
ENSG00000235333	PVRIG2P			ENSG00000156804	FBXO32	immune-related gene
ENSG00000235554	AC005822.1			ENSG00000156831	NSMCE2
ENSG00000235834	RP1-60N8.1			ENSG00000156990	RPUSD3
ENSG00000236199	RP11-264I13.2			ENSG00000157106	SMG1
ENSG00000236200	KDM4A-AS1			ENSG00000157181	C1orf27
ENSG00000236404	RP11-125B21.2			ENSG00000157193	LRP8
ENSG00000236452	AC123023.1			ENSG00000157224	CLDN12
ENSG00000236607	RP11-691L4.2			ENSG00000157350	ST3GAL2
ENSG00000236671	PRKG1-AS1			ENSG00000157379	DHRS1
ENSG00000236846	RP11-239E10.2			ENSG00000157404	KIT	immune-related gene
ENSG00000236990	RP11-433J20.1			ENSG00000157450	RNF111	immune-related gene
ENSG00000237009	GLIS3-AS1			ENSG00000157483	MYO1E
ENSG00000237037	NDUFA6-AS1			ENSG00000157538	DSCR3
ENSG00000237178	AC019080.1			ENSG00000157540	DYRK1A
ENSG00000237341	SYP-AS1			ENSG00000157557	ETS2
ENSG00000237382	RPL21P121			ENSG00000157570	TSPAN18
ENSG00000237399	PITRM1-AS1			ENSG00000157601	MX1	immune-related gene
ENSG00000237453	RP11-67L3.2			ENSG00000157613	CREB3L1
ENSG00000237470	DCLRE1CP1			ENSG00000157654	PALM2-AKAP2
ENSG00000237655	AC073834.3			ENSG00000157657	ZNF618
ENSG00000237738	RNF216-IT1			ENSG00000157800	SLC37A3
ENSG00000237765	FAM200B			ENSG00000157823	AP3S2
ENSG00000238098	ABCA17P			ENSG00000157856	DRC1
ENSG00000238133	MLK7-AS1			ENSG00000157985	AGAP1
ENSG00000238185	RP11-252M21.6			ENSG00000158008	EXTL1
ENSG00000238260	RP11-46F15.2			ENSG00000158014	SLC30A2
ENSG00000238295	snoU13			ENSG00000158019	BRE
ENSG00000238406	RNU7-171P			ENSG00000158022	TRIM63	immune-related gene
ENSG00000238486	snoU13			ENSG00000158161	EYA3
ENSG00000238541	snoU13			ENSG00000158163	DZIP1L
ENSG00000238588	snoU13			ENSG00000158195	WASF2	immune-related gene
ENSG00000238741	SCARNA7			ENSG00000158286	RNF207
ENSG00000238824	snoU13			ENSG00000158296	SLC13A3
ENSG00000238910	snoU13			ENSG00000158321	AUTS2
ENSG00000238924	RNU7-163P			ENSG00000158470	B4GALT5
ENSG00000239039	SNORD13			ENSG00000158486	DNAH3
ENSG00000239213	RP11-85F14.5			ENSG00000158560	DYNC1I1	immune-related gene
ENSG00000239726	RN7SL688P			ENSG00000158578	ALAS2
ENSG00000239919	SNRPGP3			ENSG00000158773	USF1
ENSG00000240233	RN7SL587P			ENSG00000159200	RCAN1	immune-related gene
ENSG00000240470	RN7SL346P			ENSG00000159216	RUNX1
ENSG00000240484	RP11-386M24.1			ENSG00000159399	HK2
ENSG00000240521	RP11-680B3.2			ENSG00000159708	LRRC36
ENSG00000240790	AC073934.6			ENSG00000159840	ZYX
ENSG00000240849	TMEM189			ENSG00000159882	ZNF230
ENSG00000240893	RP11-572C15.5			ENSG00000159917	ZNF235
ENSG00000240980	RP11-734K21.4			ENSG00000160055	TMEM234
ENSG00000241150	RP11-308D16.2			ENSG00000160124	CCDC58
ENSG00000241553	ARPC4	immune-related gene		ENSG00000160145	KALRN
ENSG00000241770	RP11-555M1.3			ENSG00000160179	ABCG1	immune-related gene
ENSG00000241886	RP11-242C19.2			ENSG00000160190	SLC37A1
ENSG00000241933	RP11-755B10.3			ENSG00000160207	HSF2BP
ENSG00000241962	C2orf15			ENSG00000160214	RRP1
ENSG00000242207	HOXB-AS4			ENSG00000160216	AGPAT3
ENSG00000242294	STAG3L5P			ENSG00000160271	RALGDS
ENSG00000242770	RP11-180K7.1			ENSG00000160323	ADAMTS13
ENSG00000242976	RN7SL177P			ENSG00000160325	CACFD1
ENSG00000243055	GK-AS1			ENSG00000160326	SLC2A6
ENSG00000243147	MRPL33			ENSG00000160408	ST6GALNAC6
ENSG00000243230	RP11-286H14.8			ENSG00000160593	AMICA1	immune-related gene
ENSG00000243389	AC012442.5			ENSG00000160683	CXCR5
ENSG00000243469	RPL7P51			ENSG00000160746	ANO10
ENSG00000243478	AOX2P			ENSG00000160844	GATS
ENSG00000243587	C6orf183			ENSG00000160963	COL26A1
ENSG00000243649	CFB	immune-related gene		ENSG00000161011	SQSTM1	immune-related gene
ENSG00000243978	RGAG1			ENSG00000161013	MGAT4B
ENSG00000244040	IL12A-AS1			ENSG00000161021	MAML1
ENSG00000244078	RP11-431I8.1			ENSG00000161057	PSMC2	immune-related gene
ENSG00000244218	RN7SL81P			ENSG00000161202	DVL3
ENSG00000244255	CFB	immune-related gene		ENSG00000161610	HCRT
ENSG00000244283	RPL23AP73			ENSG00000161847	RAVER1
ENSG00000244301	AOX3P			ENSG00000162129	CLPB
ENSG00000244326	RN7SL814P			ENSG00000162139	NEU3
ENSG00000244515	KRT18P34			ENSG00000162290	DCP1A
ENSG00000244687	UBE2V1	immune-related gene		ENSG00000162366	PDZK1IP1
ENSG00000244730	RP13-1056D16.2			ENSG00000162407	PPAP2B
ENSG00000245067	IGFBP7-AS1			ENSG00000162419	GMEB1
ENSG00000245526	LINC00461			ENSG00000162433	AK4
ENSG00000245768	RP11-410D17.2			ENSG00000162434	JAK1	immune-related gene
ENSG00000245864	CTC-467M3.1			ENSG00000162496	DHRS3
ENSG00000245904	RP11-796E2.4			ENSG00000162517	PEF1
ENSG00000247121	CTD-2260A17.2			ENSG00000162599	NFIA
ENSG00000247199	RP11-373N22.3			ENSG00000162600	OMA1
ENSG00000247570	SDCBPP2			ENSG00000162613	FUBP1
ENSG00000247828	TMEM161B-AS1			ENSG00000162621	LRRC53
ENSG00000248278	SUMO2P17			ENSG00000162645	GBP2	immune-related gene
ENSG00000248332	RP11-236J17.5			ENSG00000162650	ATXN7L2
ENSG00000248360	LINC00504			ENSG00000162654	GBP4
ENSG00000248440	RP11-231G15.1			ENSG00000162692	VCAM1	immune-related gene
ENSG00000248459	RP11-93K22.1			ENSG00000162714	ZNF496
ENSG00000248505	RP11-319E12.1			ENSG00000162755	KLHDC9
ENSG00000248517	RP11-386B13.4			ENSG00000162772	ATF3	immune-related gene
ENSG00000248553	OR52H2P			ENSG00000162779	AXDND1
ENSG00000248574	ADAM20P2			ENSG00000162849	KIF26B
ENSG00000248973	RP11-445O3.2			ENSG00000162923	WDR26
ENSG00000248996	RP11-1334A24.6			ENSG00000162924	REL	immune-related gene
ENSG00000249042	CTD-2015H6.3			ENSG00000162927	PUS10
ENSG00000249061	RP11-72L22.1			ENSG00000162931	TRIM17
ENSG00000249240	AC069368.3			ENSG00000162944	RFTN2
ENSG00000249252	RP11-665G4.1			ENSG00000162971	TYW5
ENSG00000249343	CTD-2275D24.2			ENSG00000162972	C2orf47
ENSG00000249407	IL20RB-AS1			ENSG00000163029	SMC6
ENSG00000249669	MIR143HG			ENSG00000163050	ADCK3
ENSG00000249755	RP11-466G12.2			ENSG00000163093	BBS5
ENSG00000249825	CTD-2201I18.1			ENSG00000163113	OTUD7B
ENSG00000249853	HS3ST5			ENSG00000163125	RPRD2
ENSG00000249915	PDCD6			ENSG00000163131	CTSS	immune-related gene
ENSG00000249941	CTD-2046I8.1			ENSG00000163166	IWS1
ENSG00000250061	RP11-541P9.3			ENSG00000163171	CDC42EP3
ENSG00000250151	ARPC4-TTLL3			ENSG00000163202	LCE3D
ENSG00000250220	RP11-692D12.1			ENSG00000163297	ANTXR2
ENSG00000250305	KIAA1456			ENSG00000163347	CLDN1
ENSG00000250384	UBE2CP3			ENSG00000163349	HIPK1
ENSG00000250446	CTD-2275D24.3			ENSG00000163393	SLC22A15
ENSG00000250514	RP11-96P7.1			ENSG00000163399	ATP1A1
ENSG00000250572	RP11-529H2.1			ENSG00000163539	CLASP2
ENSG00000250588	IQCJ-SCHIP1			ENSG00000163558	PRKCI
ENSG00000250644	RP11-295K3.1			ENSG00000163602	RYBP
ENSG00000250748	RP11-230G5.2			ENSG00000163633	C4orf36
ENSG00000250771	RP11-153M7.3			ENSG00000163635	ATXN7
ENSG00000250988	RP11-752G15.6			ENSG00000163644	PPM1K
ENSG00000250999	RP11-1379J22.5			ENSG00000163655	GMPS
ENSG00000251002	AE000661.37			ENSG00000163681	SLMAP
ENSG00000251041	CTD-2275D24.1			ENSG00000163694	RBM47
ENSG00000251184	RP11-101E3.5			ENSG00000163697	APBB2
ENSG00000251396	RP11-163N6.2			ENSG00000163701	IL17RE	immune-related gene
ENSG00000251461	RP11-501C14.6			ENSG00000163702	IL17RC
ENSG00000251503	APITD1-CORT			ENSG00000163788	SNRK
ENSG00000251556	RP11-118M9.3			ENSG00000163803	PLB1
ENSG00000251595	ABCA11P			ENSG00000163807	KIAA1143
ENSG00000251957	RNU6-1095P			ENSG00000163808	KIF15	immune-related gene
ENSG00000252051	RN7SKP276			ENSG00000163815	CLEC3B
ENSG00000252222	RNU7-13P			ENSG00000163848	ZNF148
ENSG00000252372	SNORD112			ENSG00000163877	SNIP1
ENSG00000252485	Vault			ENSG00000163885	CCDC37
ENSG00000252690	SCARNA15			ENSG00000164008	C1orf50
ENSG00000252889	RNU6-1236P			ENSG00000164056	SPRY1
ENSG00000252994	RNU6-1231P			ENSG00000164099	PRSS12
ENSG00000253098	RNU7-161P			ENSG00000164111	ANXA5
ENSG00000253111	RP11-136O12.2			ENSG00000164124	TMEM144
ENSG00000253133	RP11-360L9.4			ENSG00000164142	FAM160A1
ENSG00000253174	RP11-360L9.7			ENSG00000164163	ABCE1
ENSG00000253175	RP11-267M23.6			ENSG00000164164	OTUD4
ENSG00000253194	RP11-351A11.1			ENSG00000164187	LMBRD2
ENSG00000253204	RP5-1009N12.1			ENSG00000164188	RANBP3L
ENSG00000253230	LINC00599			ENSG00000164236	ANKRD33B
ENSG00000253261	CTC-280C13.1			ENSG00000164258	NDUFS4
ENSG00000253271	RP11-1059L18.1			ENSG00000164292	RHOBTB3
ENSG00000253287	RP11-281N10.1			ENSG00000164327	RICTOR	immune-related gene
ENSG00000253379	RP11-1102P16.1			ENSG00000164329	PAPD4
ENSG00000253669	KB-1732A1.1			ENSG00000164330	EBF1
ENSG00000253704	RP11-267M23.4			ENSG00000164430	MB21D1	immune-related gene
ENSG00000253773	KB-1047C11.2			ENSG00000164440	TXLNB
ENSG00000253796	RP11-1084E5.1			ENSG00000164465	DCBLD1
ENSG00000253844	RP11-546K22.1			ENSG00000164535	DAGLB
ENSG00000253944	RP11-156K13.1			ENSG00000164543	STK17A
ENSG00000253954	HMGN1P38			ENSG00000164604	GPR85
ENSG00000254014	RP11-363E6.1			ENSG00000164619	BMPER
ENSG00000254015	CTD-2547L16.2			ENSG00000164675	IQUB
ENSG00000254087	LYN	immune-related gene		ENSG00000164691	TAGAP
ENSG00000254415	SIGLEC14	immune-related gene		ENSG00000164715	LMTK2
ENSG00000254420	RP11-452H21.1			ENSG00000164733	CTSB	immune-related gene
ENSG00000254531	AP001816.1			ENSG00000164749	HNF4G
ENSG00000254608	RP11-56A10.1			ENSG00000164796	CSMD3
ENSG00000254614	AP003068.23			ENSG00000164808	SPIDR
ENSG00000254671	STT3A-AS1			ENSG00000164823	OSGIN2
ENSG00000254870	ATP6V1G2-DDX39B			ENSG00000164879	CA3
ENSG00000254871	RP11-702F3.2			ENSG00000164916	FOXK1
ENSG00000254996	ANKHD1-EIF4EBP3			ENSG00000164951	PDP1
ENSG00000255072	PIGY			ENSG00000164961	KIAA0196
ENSG00000255084	RP11-843A23.1			ENSG00000165030	NFIL3	immune-related gene
ENSG00000255188	RP11-507F16.1			ENSG00000165046	LETM2
ENSG00000255239	AP002954.6			ENSG00000165102	HGSNAT
ENSG00000255346	NOX5			ENSG00000165181	C9orf84
ENSG00000255394	C8orf49			ENSG00000165185	KIAA1958
ENSG00000255529	POLR2M			ENSG00000165219	GAPVD1
ENSG00000255741	RP11-757G1.5			ENSG00000165233	C9orf89
ENSG00000255990	AC034102.1			ENSG00000165244	ZNF367
ENSG00000256004	RP11-20D14.4			ENSG00000165312	OTUD1
ENSG00000256268	RP11-221N13.3			ENSG00000165406	2020-03-08
ENSG00000256280	RP11-466C23.5			ENSG00000165443	PHYHIPL
ENSG00000256347	OR8R1P			ENSG00000165568	AKR1E2
ENSG00000256403	RP11-7N14.1			ENSG00000165637	VDAC2
ENSG00000256442	RP11-705C15.4			ENSG00000165644	COMTD1
ENSG00000256582	RP11-75L1.1			ENSG00000165695	AK8
ENSG00000256594	RP11-705C15.2			ENSG00000165806	CASP7	immune-related gene
ENSG00000256915	RP11-221N13.4			ENSG00000165819	METTL3
ENSG00000257027	RP11-705C15.3			ENSG00000165891	E2F7
ENSG00000257156	RP11-13A1.3			ENSG00000165899	OTOGL
ENSG00000257268	RP1-74B13.2			ENSG00000165914	TTC7B
ENSG00000257322	RP11-511B23.2			ENSG00000165959	CLMN
ENSG00000257327	RP11-650K20.3			ENSG00000166012	TAF1D
ENSG00000257365	FNTB			ENSG00000166016	ABTB2
ENSG00000257389	RP11-153F5.3			ENSG00000166025	AMOTL1
ENSG00000257449	RP11-603J24.4			ENSG00000166035	LIPC
ENSG00000257452	RP1-71H24.1			ENSG00000166128	RAB8B
ENSG00000258119	RP11-804F13.1			ENSG00000166272	WBP1L
ENSG00000258136	RP11-864J10.4			ENSG00000166377	ATP9B
ENSG00000258171	RP11-511B23.3			ENSG00000166435	XRRA1
ENSG00000258199	RP11-977G19.5			ENSG00000166471	TMEM41B
ENSG00000258315	C17orf49			ENSG00000166510	CCDC68
ENSG00000258317	RP11-603J24.5			ENSG00000166529	ZSCAN21
ENSG00000258394	CTD-2307P3.1			ENSG00000166569	CPLX4
ENSG00000258430	RP11-982M15.2			ENSG00000166582	CENPV
ENSG00000258465	DCAF8			ENSG00000166669	ATF7IP2
ENSG00000258472	RP11-192H23.4			ENSG00000166825	ANPEP
ENSG00000258504	RP11-638I2.6			ENSG00000166949	SMAD3	immune-related gene
ENSG00000258555	SPECC1L-ADORA2A			ENSG00000166974	MAPRE2
ENSG00000258569	RP11-99E15.2			ENSG00000167193	CRK	immune-related gene
ENSG00000258570	RP11-452K20.1			ENSG00000167202	TBC1D2B
ENSG00000258700	LINC00871			ENSG00000167220	HDHD2
ENSG00000258726	DUXAP6			ENSG00000167232	ZNF91
ENSG00000258741	RP11-386M24.4			ENSG00000167258	CDK12
ENSG00000259052	AL157871.2			ENSG00000167371	PRRT2
ENSG00000259062	ACTN1-AS1			ENSG00000167397	VKORC1
ENSG00000259124	RP11-187O7.3			ENSG00000167468	GPX4
ENSG00000259164	RP11-463C8.4			ENSG00000167522	ANKRD11
ENSG00000259275	RP11-522B15.3			ENSG00000167552	TUBA1A
ENSG00000259285	CTD-2330J20.2			ENSG00000167553	TUBA1C
ENSG00000259293	RP11-355N15.1			ENSG00000167625	ZNF526
ENSG00000259426	RP11-253M7.1			ENSG00000167703	SLC43A2
ENSG00000259476	RP11-50C13.2			ENSG00000167904	TMEM68
ENSG00000259580	RP11-37C7.1			ENSG00000167925	GHDC
ENSG00000259802	CTD-2256P15.2			ENSG00000168016	TRANK1
ENSG00000259865	RP11-488L18.10			ENSG00000168026	TTC21A
ENSG00000259867	RP11-525K10.3			ENSG00000168036	CTNNB1	immune-related gene
ENSG00000260027	HOXB7			ENSG00000168038	ULK4
ENSG00000260030	RP11-686F15.2			ENSG00000168137	SETD5
ENSG00000260072	CTD-2313J23.1			ENSG00000168228	ZCCHC4
ENSG00000260105	AOC4P			ENSG00000168256	NKIRAS2	immune-related gene
ENSG00000260132	LA16c-312E8.2			ENSG00000168367	LINC00917
ENSG00000260209	RP11-680F20.10			ENSG00000168374	ARF4
ENSG00000260228	RP11-483P21.2			ENSG00000168421	RHOH
ENSG00000260425	LA16c-316G12.2			ENSG00000168439	STIP1
ENSG00000260473	RP11-923I11.4			ENSG00000168461	RAB31
ENSG00000260479	RP11-556H2.3			ENSG00000168477	TNXB
ENSG00000260492	RP11-686F15.3			ENSG00000168556	ING2
ENSG00000260661	RP11-152L20.3			ENSG00000168564	CDKN2AIP
ENSG00000261000	RP11-534L20.5			ENSG00000168575	SLC20A2
ENSG00000261049	RP11-357N13.1			ENSG00000168615	ADAM9
ENSG00000261088	RP11-61A14.3			ENSG00000168621	GDNF
ENSG00000261114	RP11-325K4.2			ENSG00000168658	VWA3B
ENSG00000261130	RP11-1021N1.1			ENSG00000168685	IL7R
ENSG00000261136	RP11-37C7.3			ENSG00000168734	PKIG
ENSG00000261222	CTD-2006K23.1			ENSG00000168818	STX18
ENSG00000261270	RP11-325K4.3			ENSG00000168917	SLC35G2
ENSG00000261308	RP11-923I11.7			ENSG00000168955	TM4SF20
ENSG00000261346	RP11-297C4.2			ENSG00000168959	GRM5
ENSG00000261353	CTA-14H9.5			ENSG00000169083	AR
ENSG00000261586	RP11-923I11.6			ENSG00000169105	CHST14
ENSG00000261705	RP11-61A14.2			ENSG00000169122	FAM110B
ENSG00000261744	RP11-21B21.4			ENSG00000169169	CPT1C
ENSG00000262003	RP11-676J12.7			ENSG00000169189	NSMCE1
ENSG00000262302	RP1-4G17.5			ENSG00000169248	CXCL11	immune-related gene
ENSG00000262468	RP11-95P2.1			ENSG00000169403	PTAFR	immune-related gene
ENSG00000262990	CTC-281F24.2			ENSG00000169429	IL8	immune-related gene
ENSG00000263069	CTD-2047H16.4			ENSG00000169436	COL22A1
ENSG00000263072	RP11-473M20.14			ENSG00000169442	CD52
ENSG00000263105	RP11-95P2.3			ENSG00000169499	PLEKHA2
ENSG00000263220	RP11-420A6.2			ENSG00000169504	CLIC4
ENSG00000263400	CTC-297N7.5			ENSG00000169564	PCBP1	immune-related gene
ENSG00000263412	RP5-890E16.2			ENSG00000169599	NFU1
ENSG00000263441	AC012181.1			ENSG00000169604	ANTXR1
ENSG00000263448	AL133410.1			ENSG00000169688	MT1B
ENSG00000263527	MIR4526			ENSG00000169813	HNRNPF
ENSG00000264036	RN7SL198P			ENSG00000169814	BTD
ENSG00000264324	RP11-287D1.3			ENSG00000169871	TRIM56	immune-related gene
ENSG00000264480	MIR4714			ENSG00000169884	WNT10B
ENSG00000264483	MIR5008			ENSG00000169918	OTUD7A
ENSG00000264523	RP11-158I9.7			ENSG00000169926	KLF13
ENSG00000264590	RN7SL512P			ENSG00000169994	MYO7B
ENSG00000264800	MIR4294			ENSG00000170037	CNTROB
ENSG00000264802	MIR5191			ENSG00000170043	TRAPPC1
ENSG00000264929	RN7SL348P			ENSG00000170142	UBE2E1	immune-related gene
ENSG00000265467	AC090559.1			ENSG00000170144	HNRNPA3
ENSG00000265559	RN7SL652P			ENSG00000170270	C14orf142
ENSG00000265587	AC068580.1			ENSG00000170310	STX8
ENSG00000266173	STRADA			ENSG00000170442	KRT86
ENSG00000266335	RP11-25O3.1			ENSG00000170523	KRT83
ENSG00000266376	AC093165.1			ENSG00000170615	SLC26A5
ENSG00000266513	RP11-874J12.3			ENSG00000170627	GTSF1
ENSG00000266803	RP1-77H15.1			ENSG00000170633	RNF34	immune-related gene
ENSG00000266813	AF196779.1			ENSG00000170743	SYT9
ENSG00000266969	RP11-773H22.4			ENSG00000170776	AKAP13
ENSG00000267047	RP11-589P10.7			ENSG00000170871	KIAA0232
ENSG00000267106	C19orf82			ENSG00000170927	PKHD1
ENSG00000267168	RP11-318A15.7			ENSG00000171044	XKR6
ENSG00000267281	RP11-793H13.10			ENSG00000171109	MFN1	immune-related gene
ENSG00000267320	AC005780.1			ENSG00000171121	KCNMB3
ENSG00000267326	AC015849.14			ENSG00000171169	NAIF1
ENSG00000267337	CTC-782O7.1			ENSG00000171241	SHCBP1
ENSG00000267446	CTB-39G8.2			ENSG00000171310	CHST11
ENSG00000267503	RP11-53B2.4			ENSG00000171385	KCND3
ENSG00000267532	MIR497HG			ENSG00000171471	MAP1LC3B2
ENSG00000267561	RP5-1052I5.2			ENSG00000171488	LRRC8C
ENSG00000267582	CTD-3252C9.2			ENSG00000171492	LRRC8D
ENSG00000267623	AC022153.1			ENSG00000171517	LPAR3
ENSG00000267747	RP11-392O1.4			ENSG00000171604	CXXC5
ENSG00000267764	RP11-484L8.1			ENSG00000171611	PTCRA
ENSG00000267815	CTB-191K22.5			ENSG00000171729	TMEM51
ENSG00000267881	CEA			ENSG00000171791	BCL2	immune-related gene
ENSG00000267905	CTD-2616J11.16			ENSG00000171984	C20orf196
ENSG00000267984	CTD-2616J11.9			ENSG00000171988	JMJD1C
ENSG00000268087	CTC-429P9.2			ENSG00000172006	ZNF554
ENSG00000268193	AC002985.3			ENSG00000172031	EPHX4
ENSG00000268500	SIGLEC5	immune-related gene		ENSG00000172123	SLFN12
ENSG00000268635	DKFZP434E1119			ENSG00000172164	SNTB1
ENSG00000268746	CTD-2571L23.8			ENSG00000172167	MTBP
ENSG00000268788	AC110615.1			ENSG00000172175	MALT1	immune-related gene
ENSG00000268790	CTC-429P9.4			ENSG00000172244	C5orf34
ENSG00000268852	AC132872.2			ENSG00000172262	ZNF131
ENSG00000269179	CTC-326K19.6			ENSG00000172292	CERS6
ENSG00000269190	FBXO17	immune-related gene		ENSG00000172315	TP53RK
ENSG00000269197	AC090574.1			ENSG00000172354	GNB2	immune-related gene
ENSG00000269419	CTD-2538G9.3			ENSG00000172379	ARNT2
ENSG00000269619	CTD-3023J11.2			ENSG00000172403	SYNPO2
ENSG00000269800	PLEKHA3P1			ENSG00000172456	FGGY
ENSG00000269871	AC040977.1			ENSG00000172493	AFF1
ENSG00000269900	RMRP			ENSG00000172500	FIBP
ENSG00000269936	MIR145			ENSG00000172590	MRPL52
ENSG00000270012	LL0XNC01-7P3.1			ENSG00000172716	SLFN11
ENSG00000270114	RP5-1048B16.1			ENSG00000172775	FAM192A
ENSG00000270133	CTC-303L1.2			ENSG00000172817	CYP7B1
ENSG00000270690	RP11-349G13.3			ENSG00000172888	ZNF621
ENSG00000270820	RP11-355B11.2			ENSG00000172890	NADSYN1
ENSG00000271166	RP11-409O11.3			ENSG00000172893	DHCR7
ENSG00000271723	MROH7-TTC4			ENSG00000172915	NBEA
ENSG00000271738	RP11-137H2.6			ENSG00000172977	KAT5
ENSG00000271752	RP11-269M20.3			ENSG00000173068	BNC2
ENSG00000271793	RP11-321N4.5			ENSG00000173120	KDM2A
ENSG00000271913	RP1-111C20.4			ENSG00000173153	ESRRA
ENSG00000271989	RP4-736L20.3			ENSG00000173221	GLRX	immune-related gene
ENSG00000272043	RP11-44N11.3			ENSG00000173239	LIPM
ENSG00000272298	RP11-386M24.8			ENSG00000173264	GPR137
ENSG00000272324	CTD-2154B17.4			ENSG00000173334	TRIB1
ENSG00000272384	RP11-44N11.2			ENSG00000173401	GLIPR1L1
ENSG00000272635	LLNLF-65H9.1			ENSG00000173404	INSM1
ENSG00000272752	STAG3L5P-PVRIG2P-PILRB			ENSG00000173406	DAB1
ENSG00000272853	RP11-398C13.6			ENSG00000173409	ARV1
ENSG00000272856	RP11-710E1.2			ENSG00000173451	THAP2
ENSG00000272917	RP11-705C15.5			ENSG00000173517	PEAK1
ENSG00000272977	CTA-390C10.10			ENSG00000173546	CSPG4
ENSG00000273155	MRPL30			ENSG00000173567	GPR113
ENSG00000273355	RP11-672L10.6			ENSG00000173575	CHD2
				ENSG00000173698	GPR64
				ENSG00000173706	HEG1
				ENSG00000173821	RNF213	immune-related gene
				ENSG00000173848	NET1
				ENSG00000173926	2020-03-03
				ENSG00000173960	UBXN2A
				ENSG00000174106	LEMD3
				ENSG00000174125	TLR1	immune-related gene
				ENSG00000174130	TLR6	immune-related gene
				ENSG00000174197	MGA
				ENSG00000174243	DDX23
				ENSG00000174405	LIG4
				ENSG00000174429	ABRA
				ENSG00000174564	IL20RB
				ENSG00000174606	ANGEL2
				ENSG00000174705	SH3PXD2B
				ENSG00000174837	EMR1
				ENSG00000174839	DENND6A
				ENSG00000174840	PDE12	immune-related gene
				ENSG00000174842	GLMN
				ENSG00000174844	DNAH12
				ENSG00000174945	AMZ1
				ENSG00000175040	CHST2
				ENSG00000175130	MARCKSL1
				ENSG00000175155	YPEL2
				ENSG00000175175	PPM1E
				ENSG00000175198	PCCA
				ENSG00000175221	MED16
				ENSG00000175224	ATG13
				ENSG00000175354	PTPN2	immune-related gene
				ENSG00000175471	MCTP1
				ENSG00000175592	FOSL1
				ENSG00000175600	SUGCT
				ENSG00000175602	CCDC85B
				ENSG00000175643	RMI2
				ENSG00000175691	ZNF77
				ENSG00000175768	TOMM5
				ENSG00000175773	RP11-121M22.1
				ENSG00000175857	GAPT
				ENSG00000175895	PLEKHF2
				ENSG00000175931	UBE2O	immune-related gene
				ENSG00000176092	AIM1L
				ENSG00000176124	DLEU1
				ENSG00000176209	SMIM19
				ENSG00000176407	KCMF1
				ENSG00000176571	CNBD1
				ENSG00000176624	MEX3C	immune-related gene
				ENSG00000176788	BASP1
				ENSG00000176890	TYMS
				ENSG00000176912	C18orf56
				ENSG00000177103	DSCAML1
				ENSG00000177409	SAMD9L
				ENSG00000177453	NIM1K
				ENSG00000177485	ZBTB33
				ENSG00000177519	RPRM
				ENSG00000177669	MBOAT4
				ENSG00000177694	NAALADL2
				ENSG00000177699	RP11-16K12.1
				ENSG00000177733	HNRNPA0
				ENSG00000177752	YIPF7
				ENSG00000177842	ZNF620
				ENSG00000177873	ZNF619
				ENSG00000177885	GRB2	immune-related gene
				ENSG00000177917	ARL6IP6
				ENSG00000177993	ZNRF3-AS1
				ENSG00000178074	C2orf69
				ENSG00000178104	PDE4DIP
				ENSG00000178146	RP1-232L22__B.1
				ENSG00000178175	ZNF366
				ENSG00000178209	PLEC	immune-related gene
				ENSG00000178295	GEN1
				ENSG00000178394	HTR1A
				ENSG00000178445	GLDC
				ENSG00000178568	ERBB4	immune-related gene
				ENSG00000178636	RP11-455G16.1
				ENSG00000178685	PARP10
				ENSG00000178950	GAK
				ENSG00000178974	FBXO34
				ENSG00000178988	MRFAP1L1
				ENSG00000178997	EXD1
				ENSG00000179010	MRFAP1
				ENSG00000179119	SPTY2D1
				ENSG00000179151	EDC3
				ENSG00000179163	FUCA1
				ENSG00000179262	RAD23A	immune-related gene
				ENSG00000179271	GADD45GIP1
				ENSG00000179335	CLK3
				ENSG00000179397	C1orf101
				ENSG00000179542	SLITRK4
				ENSG00000179761	PIPOX
				ENSG00000179796	LRRC3B
				ENSG00000179818	PCBP1-AS1
				ENSG00000180316	PNPLA1
				ENSG00000180423	HARBI1
				ENSG00000180481	GLIPR1L2
				ENSG00000180611	MB21D2
				ENSG00000180771	SRSF8
				ENSG00000180817	PPA1
				ENSG00000180881	CAPS2
				ENSG00000180953	ST20
				ENSG00000181045	SLC26A11
				ENSG00000181061	HIGD1A
				ENSG00000181092	ADIPOQ	immune-related gene
				ENSG00000181218	HIST3H2A
				ENSG00000181374	CCL13
				ENSG00000181381	DDX60L
				ENSG00000181523	SGSH
				ENSG00000181634	TNFSF15
				ENSG00000181649	PHLDA2
				ENSG00000181741	FDX1P1
				ENSG00000182095	TNRC18
				ENSG00000182118	FAM89A
				ENSG00000182149	IST1
				ENSG00000182185	RAD51B
				ENSG00000182247	UBE2E2	immune-related gene
				ENSG00000182271	TMIGD1
				ENSG00000182318	ZSCAN22
				ENSG00000182326	C1S	immune-related gene
				ENSG00000182389	CACNB4
				ENSG00000182450	KCNK4
				ENSG00000182606	TRAK1
				ENSG00000182621	PLCB1
				ENSG00000182718	ANXA2	immune-related gene
				ENSG00000182919	C11orf54
				ENSG00000182973	CNOT10
				ENSG00000183049	CAMK1D
				ENSG00000183155	RABIF
				ENSG00000183255	PTTG1IP
				ENSG00000183401	CCDC159
				ENSG00000183486	MX2	immune-related gene
				ENSG00000183578	TNFAIP8L3
				ENSG00000183579	ZNRF3
				ENSG00000183625	CCR3	immune-related gene
				ENSG00000183684	ALYREF
				ENSG00000183723	CMTM4
				ENSG00000183735	TBK1	immune-related gene
				ENSG00000183780	SLC35F3
				ENSG00000183783	KCTD8
				ENSG00000183801	OLFML1
				ENSG00000183822	CTA-833B7.2
				ENSG00000183856	IQGAP3
				ENSG00000183876	ARSI
				ENSG00000184014	DENND5A
				ENSG00000184060	ADAP2
				ENSG00000184106	TREML3P
				ENSG00000184221	OLIG1
				ENSG00000184349	EFNA5
				ENSG00000184374	COLEC10
				ENSG00000184384	MAML2
				ENSG00000184454	NCMAP
				ENSG00000184459	BPIFC
				ENSG00000184465	WDR27
				ENSG00000184575	XPOT
				ENSG00000184588	PDE4B
				ENSG00000184599	FAM19A3
				ENSG00000184661	CDCA2
				ENSG00000184719	RNLS
				ENSG00000184743	ATL3
				ENSG00000184900	SUMO3
				ENSG00000184979	USP18
				ENSG00000185002	RFX6
				ENSG00000185008	ROBO2
				ENSG00000185009	AP3M1
				ENSG00000185052	SLC24A3
				ENSG00000185070	FLRT2
				ENSG00000185088	RPS27L
				ENSG00000185104	FAF1
				ENSG00000185127	C6orf120
				ENSG00000185201	IFITM2	immune-related gene
				ENSG00000185250	PPIL6
				ENSG00000185338	SOCS1	immune-related gene
				ENSG00000185340	GAS2L1
				ENSG00000185420	SMYD3
				ENSG00000185627	PSMD13	immune-related gene
				ENSG00000185630	PBX1
				ENSG00000185658	BRWD1
				ENSG00000185722	ANKFY1
				ENSG00000185737	NRG3	immune-related gene
				ENSG00000185842	DNAH14
				ENSG00000185896	LAMP1
				ENSG00000185900	POMK
				ENSG00000185947	ZNF267
				ENSG00000185972	CCIN
				ENSG00000186019	AC084219.4
				ENSG00000186106	ANKRD46
				ENSG00000186205	MARC1
				ENSG00000186280	KDM4D
				ENSG00000186300	ZNF555
				ENSG00000186409	CCDC30
				ENSG00000186439	TRDN
				ENSG00000186517	ARHGAP30
				ENSG00000186583	SPATC1
				ENSG00000186625	KATNA1
				ENSG00000186815	TPCN1
				ENSG00000187008	PKD1L3
				ENSG00000187037	GPR141
				ENSG00000187391	MAGI2
				ENSG00000187446	CHP1
				ENSG00000187595	ZNF385C
				ENSG00000187605	TET3
				ENSG00000187672	ERC2
				ENSG00000187735	TCEA1
				ENSG00000187741	FANCA
				ENSG00000187783	TMEM72
				ENSG00000187812	RP11-24M17.5
				ENSG00000187912	CLEC17A
				ENSG00000187950	OVCH1
				ENSG00000188186	LAMTOR4
				ENSG00000188282	RUFY4
				ENSG00000188404	SELL	immune-related gene
				ENSG00000188505	NCCRP1
				ENSG00000188554	NBR1
				ENSG00000188641	DPYD
				ENSG00000188676	IDO2
				ENSG00000188687	SLC4A5
				ENSG00000188729	OSTN
				ENSG00000188818	ZDHHC11
				ENSG00000188822	CNR2
				ENSG00000188831	DPPA3P2
				ENSG00000188846	RPL14
				ENSG00000188886	ASTL
				ENSG00000188897	CTD-3088G3.8
				ENSG00000188906	LRRK2	immune-related gene
				ENSG00000188938	FAM120AOS
				ENSG00000188994	ZNF292
				ENSG00000189067	LITAF
				ENSG00000189091	SF3B3
				ENSG00000189298	ZKSCAN3
				ENSG00000189319	FAM53B
				ENSG00000189403	HMGB1	immune-related gene
				ENSG00000196081	ZNF724P
				ENSG00000196092	PAX5
				ENSG00000196182	STK40
				ENSG00000196220	SRGAP3
				ENSG00000196323	ZBTB44
				ENSG00000196405	EVL	immune-related gene
				ENSG00000196497	IPO4
				ENSG00000196498	NCOR2
				ENSG00000196504	PRPF40A
				ENSG00000196533	C1orf186
				ENSG00000196535	MYO18A
				ENSG00000196562	SULF2
				ENSG00000196565	HBG2
				ENSG00000196588	MKL1
				ENSG00000196597	ZNF782
				ENSG00000196611	MMP1
				ENSG00000196628	TCF4	immune-related gene
				ENSG00000196711	FAM150A
				ENSG00000196743	GM2A
				ENSG00000196792	STRN3
				ENSG00000196814	MVB12B
				ENSG00000196826	ZNF709
				ENSG00000196872	KIAA1211L
				ENSG00000196890	HIST3H2BB
				ENSG00000196914	ARHGEF12
				ENSG00000196917	HCAR1
				ENSG00000196943	NOP9
				ENSG00000196975	ANXA4	immune-related gene
				ENSG00000197013	ZNF429
				ENSG00000197043	ANXA6
				ENSG00000197057	DTHD1
				ENSG00000197062	RP5-874C20.3
				ENSG00000197063	MAFG
				ENSG00000197085	NPSR1-AS1
				ENSG00000197102	DYNC1H1	immune-related gene
				ENSG00000197121	PGAP1
				ENSG00000197136	PCNXL3
				ENSG00000197245	FAM110D
				ENSG00000197265	GTF2E2
				ENSG00000197299	BLM
				ENSG00000197312	DDI2
				ENSG00000197321	SVIL
				ENSG00000197410	DCHS2
				ENSG00000197442	MAP3K5	immune-related gene
				ENSG00000197444	OGDHL
				ENSG00000197467	COL13A1
				ENSG00000197472	ZNF695
				ENSG00000197561	ELANE	immune-related gene
				ENSG00000197641	SERPINB13
				ENSG00000197694	SPTAN1
				ENSG00000197747	S100A10	immune-related gene
				ENSG00000197766	CFD	immune-related gene
				ENSG00000197818	SLC9A8
				ENSG00000197852	FAM212B
				ENSG00000197872	FAM49A
				ENSG00000197880	MDS2
				ENSG00000197943	PLCG2	immune-related gene
				ENSG00000197959	DNM3	immune-related gene
				ENSG00000197965	MPZL1
				ENSG00000197971	MBP
				ENSG00000198015	MRPL42
				ENSG00000198056	PRIM1
				ENSG00000198092	TMPRSS11F
				ENSG00000198108	CHSY3
				ENSG00000198133	TMEM229B
				ENSG00000198189	HSD17B11
				ENSG00000198270	TMEM116
				ENSG00000198369	SPRED2
				ENSG00000198380	GFPT1
				ENSG00000198382	UVRAG
				ENSG00000198492	YTHDF2
				ENSG00000198570	RD3
				ENSG00000198604	BAZ1A
				ENSG00000198624	CCDC69
				ENSG00000198682	PAPSS2
				ENSG00000198691	ABCA4
				ENSG00000198771	RCSD1
				ENSG00000198795	ZNF521
				ENSG00000198796	ALPK2
				ENSG00000198818	SFT2D1
				ENSG00000198839	ZNF277
				ENSG00000198846	TOX
				ENSG00000198853	RUSC2
				ENSG00000198870	C9orf96
				ENSG00000198890	PRMT6
				ENSG00000198919	DZIP3	immune-related gene
				ENSG00000198945	L3MBTL3
				ENSG00000198954	KIAA1279
				ENSG00000198959	TGM2
				ENSG00000199279	RNU6-661P
				ENSG00000199283	RNU1-58P
				ENSG00000199556	RNA5SP361
				ENSG00000199598	RNU6-859P
				ENSG00000199944	RNU6-653P
				ENSG00000200175	RNU6-1309P
				ENSG00000200247	RNU6-254P
				ENSG00000200303	RNU6-940P
				ENSG00000200469	RNU6-112P
				ENSG00000200483	RNU6-1017P
				ENSG00000200516	RNA5SP378
				ENSG00000200525	RNU6-1209P
				ENSG00000200677	SNORD18
				ENSG00000200980	Y_RNA
				ENSG00000200991	SNORA25
				ENSG00000201076	RNU4-51P
				ENSG00000201415	RNA5SP204
				ENSG00000201483	Y_RNA
				ENSG00000201499	RNU6-312P
				ENSG00000201535	Y_RNA
				ENSG00000201548	Y_RNA
				ENSG00000202081	RNU6-1280P
				ENSG00000202124	RNY4P3
				ENSG00000202125	RNU1-100P
				ENSG00000202272	Y_RNA
				ENSG00000202310	Y_RNA
				ENSG00000202385	Y_RNA
				ENSG00000203356	RP11-296A18.3
				ENSG00000203414	BTBD7P1
				ENSG00000203416	FAM32B
				ENSG00000203446	AC004988.1
				ENSG00000203546	RP11-176H8.1
				ENSG00000203666	EFCAB2
				ENSG00000203739	RP11-296O14.3
				ENSG00000203778	FAM229B
				ENSG00000203871	C6orf164
				ENSG00000203875	SNHG5
				ENSG00000203930	LINC00632
				ENSG00000204022	LIPJ
				ENSG00000204104	TRAF3IP1
				ENSG00000204173	LRRC37A5P
				ENSG00000204290	BTNL2	immune-related gene
				ENSG00000204362	RP11-380J14.1
				ENSG00000204397	CARD16	immune-related gene
				ENSG00000204442	FAM155A
				ENSG00000204569	PPP1R10
				ENSG00000204574	ABCF1
				ENSG00000204590	GNL1
				ENSG00000204628	GNB2L1	immune-related gene
				ENSG00000204634	TBC1D8
				ENSG00000204792	AC104135.3
				ENSG00000204842	ATXN2
				ENSG00000204929	AC074391.1
				ENSG00000204956	PCDHGA1
				ENSG00000204957	AC006486.1
				ENSG00000204977	TRIM13	immune-related gene
				ENSG00000204991	SPIRE2
				ENSG00000205212	CCDC144NL
				ENSG00000205581	HMGN1
				ENSG00000205622	AF064858.6
				ENSG00000205629	LCMT1
				ENSG00000205784	ARRDC5
				ENSG00000205794	RP11-333E13.4
				ENSG00000205795	CYS1
				ENSG00000205832	C16orf96
				ENSG00000205856	C22orf42
				ENSG00000206077	ZDHHC11B
				ENSG00000206527	PTPLB
				ENSG00000206531	CD200R1L
				ENSG00000206560	ANKRD28
				ENSG00000206573	SETD5-AS1
				ENSG00000206652	RNU1-1
				ENSG00000206749	RNU6-1083P
				ENSG00000206920	RNY1P6
				ENSG00000207024	Y_RNA
				ENSG00000207058	RNU6-784P
				ENSG00000207132	Y_RNA
				ENSG00000207233	SNORA37
				ENSG00000207291	RNU6-30P
				ENSG00000207359	RNU6-925P
				ENSG00000207386	Y_RNA
				ENSG00000207448	RNU6-520P
				ENSG00000207583	MIR606
				ENSG00000207817	MIR614
				ENSG00000207963	MIR569
				ENSG00000207997	MIR644A
				ENSG00000208022	MIR618
				ENSG00000211672	IGLV4-3
				ENSG00000212070	AC112219.1
				ENSG00000212273	SNORA40
				ENSG00000213047	DENND1B
				ENSG00000213064	SFT2D2
				ENSG00000213066	FGFR1OP
				ENSG00000213079	SCAF8
				ENSG00000213204	C6orf165
				ENSG00000213210	AC005229.5
				ENSG00000213277	MARCKSL1P1
				ENSG00000213315	CTD-3035D6.1
				ENSG00000213495	RP11-416L21.1
				ENSG00000213512	GBP7
				ENSG00000213547	VN1R64P
				ENSG00000213639	PPP1CB
				ENSG00000213676	ATF6B
				ENSG00000213719	CLIC1
				ENSG00000213722	DDAH2
				ENSG00000213906	LTB4R2
				ENSG00000213971	RP11-15H20.6
				ENSG00000214021	TTLL3
				ENSG00000214046	SMIM7
				ENSG00000214102	WEE2
				ENSG00000214160	ALG3
				ENSG00000214188	ST7-OT4
				ENSG00000214278	CTD-2228K2.2
				ENSG00000214407	RP11-221J22.1
				ENSG00000214533	KRT18P33
[truncated: 963 more rows]
